# Supplementary material
Source: Research Square preprint supplement (doi:10.21203/rs.3.rs-9461961/v1)
Supplement: Supplementary file 1 [file 20250707室内型应急避难场所平急转换技术要求 体育场馆(草案稿-接收稿).pdf › Supplementary materias/20250707室内型应急避难场所平急转换技术要求 体育场馆(草案稿-接收稿).pdf]

ICS

CCS 点击此处添加 CCS 号

DB 11

北京市地方标准

DB 11/T XXXX—XXXX

# 室内型应急避难场所平急转换技术要求 体育场馆

Technical requirements for emergency conversion of indoor emergency shelters—  
Gymnasuim

（工作组讨论稿）

在提交反馈意见时，请将您知道的相关专利连同支持性文件一并附上。

XXXX – XX – XX 发布

XXXX – XX – XX 实施

北京市市场监督管理局 发布

目 次

前 言 ..... II

引 言 ..... III

1 范围 ..... 1

2 规范性引用文件 ..... 1

3 术语和定义 ..... 1

4 总体要求 ..... 2

5 调查与评估 ..... 2

6 转换要求 ..... 4

附 录 A （资料性） 体育场馆资源调查单 ..... 10

附 录 B （资料性） 体育场馆资源评估单 ..... 25

附 录 C （资料性） 体育场馆平急转换设施设备表 ..... 30

# 前 言

本文件按照GB/T 1.1—2020《标准化工作导则 第1部分：标准化文件的结构和起草规则》的规定起草。

本文件由××××提出。  
本文件由××××归口。  
本文件起草单位：  
本文件主要起草人：

# 引 言

为贯彻落实国务院办公厅《**关于积极稳步推进超大特大城市“平急两用”公共基础设施建设的指导意见**》和应急管理部等12部门《关于加强应急避难场所建设的指导意见》的相关要求，解决北京市室内型应急避难场所数量不足的现实需求，统筹推进北京市符合应急避难功能需求的体育场馆类应急避难资源有序实现平急功能转换，保障突发事件发生时可以快速启用，制定本文件。

本文件依据有关法律、法规及标准，结合北京市特点和应急工作需求，并广泛征求意见的基础上制定而成。

设置格式[IEEWW]: 字体: 加粗, 字体颜色: 蓝色

# 室内型应急避难场所平急转换技术要求 体育场馆

## 1 范围

本文件提出了体育场馆转换为室内型应急避难场所的总体要求、平急转换前评估和转换技术要求等内容。**【运维？】****【预案+方案】**

本文件适用于体育场馆转换为室内型应急避难场所的活动。

其他大跨空间结构的室内公共场馆用作室内型应急避难场所进行平急转换时，可参考本标准技术内容执行。

**【平急范畴】**：“平疫”“平灾”“平赛”“平假”“平战”

## 2 规范性引用文件**【卫生文件？】**

下列文件中的内容通过文中的规范性引用而构成本文件必不可少的条款。其中，注日期的引用文件，仅该日期对应的版本适用于本文件；不注日期的引用文件，其最新版本（包括所有的修改单）适用于本文件。

- GB5749 生活饮用水卫生标准
- GB/T 44012 应急避难场所 术语
- GB 50140 建筑灭火器配置设计规范
- GB 50763 无障碍设计规范
- GB 55019 建筑与市政工程无障碍通用规范
- GB 51143 防灾避难场所设计规范
- GB 55019 建筑与市政工程无障碍通用规范**
- MH 5013 民用直升机场飞行场地技术标准
- DB11/T 2141 应急避难场所 分级和分类
- DB11/T 2142 应急避难场所 场址及配套设施

设置格式[IEEWW]: 字体颜色: 红色

## 3 术语和定义

GB/T 44012 界定的以及下列术语和定义适用于本文件。

### 3.1

#### 体育场馆 Gymnasuim

为满足体育竞赛、运动训练、体育教学、全民健身等活动需要而专门修建的室内型公共场所。

注1：本文件所指体育场馆所不包含体育场馆内全封闭的地下空间。

注2：按照空间类型可分为在室外进行比赛训练的体育场和在室内进行比赛训练的体育馆；按照使用性质可分为比赛场馆和练习场馆；按照体育项目可分为篮球馆、羽毛球馆、游泳馆、健身房等；按照面积可分为大、中、小三类。

注3：又称全民健身活动中心、体育中心等。

4 总体要求

- 4.1 体育场馆场址安全应符合 DB11/T 2142 相关要求。
- 4.2 体育场馆室内外可使用面积应不低于 5000 平方米。
- 4.3 体育场馆周边交通应便于应急状态下人员、物资快速集散。
- 4.4 体育场馆应具备水、电、排污、供暖、通讯等基础设施条件，便于接入应急设施设备。
- 4.5 体育场馆日常经营功能应与应急避难功能无冲突设计。
- 4.6 体育场馆经评估认定为应急避难场所前，应开展资源调查与评估。/体育场馆在平急转换前应开展资源调查与评估，确定是否具备转换条件。

5 调查与评估

5.1 调查方法

- 5.1.1 应采用文档资料收集与现场勘查相结合的方法开展资源调查。
- 5.1.2 文档资料应收集体育场馆的基本信息、自然灾害和事故灾难风险以及设防要求等材料。**【不通】**
- 5.1.3 现场勘查应开展现场测量、拍照、数据采集等工作，校核建筑和场地的空间等信息。

5.2 调查重点

- 5.2.1 资源调查主要围绕基本信息、场址安全、设防情况、结构安全、配套设施情况、周边环境情况 5 个方面展开：
  - a) 基本信息。主要调查体育场馆名称、场馆类型、观众容量、是否为室外型避难场所、场馆整体情况、场馆详情、地下空间、对外开放情况、室外空旷面积、出入口数量及方向、出入口道路分布图、功能布局、周边河湖情况、预留供水设施接口、预留供水设施接口等信息；
  - b) 场址安全。主要调查体育场馆场址面临的洪涝灾害、地震灾害、地质灾害、森林火灾风险、易燃易爆及其他潜在风险等；**【风灾】**
  - c) 设防情况。主要调查体育场馆建筑所采用的抗震、防雷、防火、防洪和排水要求等情况；**【风灾】**
  - d) 结构安全。主要调查体育场馆是否开展过结构安全相关检查或专业鉴定工作。
  - e) 配套设施情况。主要调查体育场馆内医疗救治、通讯、供水、供电、照明、消防、停车、餐饮、物资储备、无障碍、文化活动、室内通风、公共服务等设施配置情况；
  - f) 周边环境情况。主要调查体育场馆周边主干道、次干道数量，以及 1.5km 范围内应急避难场所、医疗服务设施、消防站、物资储备库、超市、派出所、小区（村）、通讯铁塔（基站）等情况。
- 5.2.2 体育场馆资源调查单可参考附录 A。**【缺应预案、人员管理制度、智能化】**

5.3 评估内容

- 5.3.1 资源调查信息汇集后，应组织地震、应急、住建、消防、水利等相关领域专家**【卫健、发改】**，对体育场馆是否具备转换为室内型应急避难场所条件展开评估，具体评估指标项和判定要求见附录 B。
- 5.3.2 主要评估内容包括但不限于下列内容：
  - g) 结构安全。主要评估体育场馆的结构安全是否符合应急避难场所运行要求。
  - h) 场址安全。主要评估体育场馆存在的自然灾害风险、事故灾难风险以及建筑设防情况。

- i) 应急交通及资源可达性。主要评估体育场馆出入口以及周边可供调用的消防、公安、医疗、物资储备、通信、应急避难等资源情况。
- j) 有效避难容量。主要评估体育场馆作为室内应急避难场所的有效避难面积和可容纳避难人数。
- k) 设施设备配置情况。主要评估供电、供水、医疗服务等基本设施以及通讯、物资储备、餐饮、消防、温度控制、通风等其他设施配置情况的功能运转情况。

5.4 技术要求

5.4.1 体育场馆调查评估应对场地和建筑进行全面、系统的检查与分析，重点关注在灾害发生时是否能安全、有效地容纳避难人员，并提供基本的生活保障和服务支持。

5.4.2 对体育场馆场地的调查评估应按照下列要求开展：

- a) 查看区域风险评估资料，核实地位于灾害风险较低区域，避开洪水淹没区、滑坡、崩塌、泥石流、活动断层带、液化土区、危险品设施、易燃易爆辐射范围等，远离次生灾害源；
- b) 对场地坡度、平整度和通风度进行技术检测，保障室外场地地形平坦、排水良好、空气流通；
- c) 测量场地地面标高，核实整体标高高于周边洪水设防水位，场地内部排水坡度合理；
- d) 现场查勘场地周边道路情况，保障场地与主要居民区、物资供应点的有效连接，便于人员转运与物资配送；
- e) 询问体育场馆相关人员或现场查勘场地内市政设施配套情况，核实是否具备快速接入应急设施设备条件；
- f) 现场查勘场地出入口，保障出入口设置不少于 2 处，宽度满足该人员密集型公共场所疏散要求；
- g) 现场查勘场地功能布局情况，核实是否具备预留扩展空间条件；
- h) 现场查勘场地无与周边建构筑物距离，核实地无坍塌、临时搭建设施倒塌、悬挂物掉落等风险；
- i) 现场查勘场地内部有无古树或重要文物建筑保护区域；
- j) 现场查勘场地与高压线走廊影响风险，仪器测量与风险区域距离；
- k) 现场查勘或查看相关资料，核实地内有无地下管廊穿行；
- l) 现场查勘、测量场地主要通道宽度和高度，保障主要通道净宽度和净空高度不小于 4.0 m；消防车道的净宽度和净空高度不小于 4.0 m。

5.4.3 对体育场馆建筑的调查评估应按照下列要求开展：

- a) 查看体育场馆竣工验收材料，核实建筑主体结构抗震设防烈度不低于当地设防烈度；
- b) 现场查勘体育场馆主体建筑结构外观，核实结构现状良好，无明显损伤、裂缝、沉降；
- c) 查看体育场馆竣工验收材料及房屋安全鉴定报告，核实大跨度空间的屋盖结构安全性符合避难场所运行要求；
- d) 查看消防验收材料中建筑耐火等级，核实其是否不低于二级，是否符合 GB 55037 中关于人员密集场所的有关规定；防火分区划分合理，防火分隔完整有效；
- e) 查看体育场馆建筑内部空间布局或平面图，核实用于避难的空间便于分割、组合以适应不同应急功能需要；
- f) 现场查勘建筑内部主要通道、楼梯的宽度、数量、位置，核实是否满足紧急疏散要求，保障疏散路线清晰，疏散门为平开门且向疏散方向开启。
- g) 现场查勘看台边缘、楼梯口、舞台边缘、下沉式场地边缘等是否存在跌落风险。

设置格式[IEEWW]: 下划线, 字体颜色: 深红

5.5 评估结论

5.5.1 依据评估要求参考依据对评估指标项进行符合程度判定，指标项判定结果分为“符合”、“部

分符合”、“不符合”三种情况，判定结果应符合下列要求：

- a) 满足所有或相应指标要求的判定为“符合”；
- b) 满足任一指标要求或不完全满足指标要求的判定为“部分符合”；
- c) 不满足所有指标要求或不满足特定指标要求的判定为“不符合”。

5.5.2 评估内容及指标中结构安全风险、自然灾害风险及抗震设防、防洪要求设为否决项。

5.5.3 资源评估结论应汇总各指标项判定结果，并按照下列规则进行综合判定：

- a) 对于评估指标全部符合评估要求的，宜优先转换为室内型应急避难场所；
- b) 对于关键指标符合评估要求，其他指标有不符合评估要求的，宜作为室内型应急避难场所潜在资源；
- c) 对于关键指标不符合评估要求的，不宜转换为室内型应急避难场所。

5.5.4 整体评估结论应给出体育场馆是否可作为室内型应急避难场所开展平急转换、适用应对灾种、可容纳避难人数等判定。

5.5.5 评定结论为宜作为室内型应急避难场所进行转换的体育场馆，应按照本文件第 6 章开展相应转换。

6 转换要求

6.1 一般要求

6.1.1 体育场馆平急转换应快速、便捷。

6.1.2 应制定体育场馆平急转换方案，明确实施方案、人员安排、工作职责以及时间进度。

6.1.3 体育场馆进行平急转换时，应结合与利用现状空间划分合理设计应急避难场所功能区，尽量不改动或少改动，必要时可结合建筑主体开展部分结构性改造。

6.1.4 灾害发生后，应根据房屋建筑安全应急评估结论对体育场馆开展平急转换。地震发生后??评估为可以使用的建筑，**当地震为孤立型或主震—余震型地震时，可开展平急转换**；当余震对体育场馆建筑造成新的损伤或破坏时，对已经应急评估为安全和待定的建筑，应重新进行应急评估。

设置格式[IEEWW]: 字体颜色: 深红

6.2 功能区转换要求

6.2.1 概述

体育场馆平时功能区与应急避难场所应急功能区平急转换应便捷、迅速，应按照避难时长转换不同功能空间，功能区转换宜参考表1进行转换。

表 1 体育场馆平急转换时主要功能区转换要求

| 避难场所应急功能区      | 体育场馆平时功能区                    |
|----------------|------------------------------|
| 应急集散区          | 室外场地、运动区域、看台                 |
| 应急宿住区          | 运动区域、贵宾用房、运动员用房、其他全民健身综合服务用房 |
| 指挥管理区          | 、管理用房、媒体用房、消防中控用房            |
| 医疗救治区          | 医疗救治室、辅助用房                   |
| <b>防疫隔离区??</b> | 辅助用房、室外空地                    |
| 物资储备区          | 、体育设备用房                      |
| 餐饮服务区          | 餐厅、其他全民健身综合服务用房              |

设置格式[IEEWW]: 字体颜色: 深红



|           |                          |
|-----------|--------------------------|
| 避难场所应急功能区 | 体育场馆平时功能区                |
| 临时教学区     | 贵宾用房、管理用房                |
| 卫生盥洗区     | 卫生间                      |
| 垃圾储运区     | 垃圾储运点、固定垃圾站、垃圾收集点        |
| 应急停车区     | 停车场                      |
| 直升机起降区??  | 室外空旷区域                   |
| 公共服务区     | 观众服务用房、其他全民健身综合服务用房、公共区域 |
| 文体活动区     | 观众服务用房、其他全民健身综合服务用房、公共区域 |

设置格式[IEEWW]: 字体颜色: 深红

6.2.2 应急集散区

- 6.2.2.1 应急集散区宜利用体育场馆室外场地、运动区域、看台等进行转换，增设或预留应急集散设施（桌椅板凳等）、标志位置等。
- 6.2.2.2 应急集散区应至少有一条道路连接应急宿住区和避难场所主要出入口。
- 6.2.2.3 当有充足室外场地时宜优先使用室外场地进行转换。

6.2.3 应急宿住区

- 6.2.3.1 应急宿住区宜利用运动区域、贵宾用房、运动员用房或其他全民健身综合服务用房等进行转换。
- 6.2.3.2 宿住区内应按照性别、家庭、特殊群体等划分不同的宿住组，宿主组之间应采取物理隔离措施，相互独立、互不干扰，保障避难人员休息和安全隐私。
- 6.2.3.3 不同宿住组之间应利用通道进行间隔，其间隔距离应不低于 1.5 米，每个床位之间应保持 0.5 米的间隔距离。
- 6.2.3.4 应急宿住区应按运动区域、贵宾用房、运动员用房或其他全民健身综合服务用房等室内有效避难面积和人均有效避难面积的比值确定单个建筑空间可容纳避难人数，人均有效避难面积应不低于 3m²。
- 6.2.3.5 应按照可容纳避难人数配置临时床，设置空间隔断、围挡功能，配置临时隔断板或隔档纱帘。
- 6.2.3.6 应按照可避难人数储备或协议储备防潮垫、被褥等宿住用品，保障紧急情况下可随时调用。
- 6.2.3.7 应急宿住区应设置疏散通道，保持行走畅通，严禁封闭、占用或堵塞。
- 6.2.3.8 地震时应优先利用室外运动区域转换为应急宿住区，经有关部门对体育场馆房屋建筑进行安全鉴定后，方可使用室内空间转换为应急宿住区。

6.2.4 指挥管理区

- 6.2.4.1 指挥管理区宜利用管理用房、媒体用房、消防中控用房等进行转换。
- 6.2.4.2 指挥管理区应具备指挥、综合控制、图像监控、网络通信、管理调度等功能，方便各方工作人员开展应急指挥和避难场所运行管理等。具体功能要求包括但不限于下列：
  - a) 广播系统应覆盖整个避难场所，图像监控系统应覆盖避难场所内的主要通道；
  - b) 应急通信应覆盖主要功能区，保障应急联络；
  - c) 信息发布设施设备可采用信息发布栏、电子显示屏、广播等进行设置。

6.2.5 医疗救治区

- 6.2.5.1 医疗救治室宜转换成医疗救治区，不具备医疗救治室的体育场馆宜将具备供水能力的辅助用房转换为医疗救治区。

- 6.2.5.2 医疗救治区应具备独立供水、垃圾收集和独立卫生间等条件。
- 6.2.5.3 医疗救治区应配置医疗器械、药品等基本设备及物资，具备紧急医疗处置的条件。

6.2.6 防疫隔离区

设置格式[IEEWW]: 字体颜色: 红色

- 6.2.6.1 防疫隔离区宜由具有供水、供电、通风良好的辅助用房或室外空地转换，配置防疫消杀设施设备，储备医用口罩和消毒液等卫生防疫物资。
- 6.2.6.2 防疫隔离区应设置在医疗救治区附近，按照卫生防疫要求与医疗救治区之间采取有效的防疫隔离措施，或根据实际情况需要合理设计“三区两通道”。
- 6.2.6.3 位于室外的防疫隔离区应位于应急避难场所下风向位置。

6.2.7 物资储备区

- 6.2.7.1 体育设备用房宜转换成物资储备区，用于存放床单被褥、洗漱用品、医疗救治用品、食物、饮用水、救灾工具等物资。
- 6.2.7.2 物资储备区应设置在干燥、通风的场地空间内，具备多层货架按照用途进行有序摆放。
- 6.2.7.3 物资储备区应采取防火措施，安装自动灭火系统和火灾自动报警系统，设置醒目禁火标识。
- 6.2.7.4 物资储备区的电气装置应符合国家现行的有关电气设计和施工安装验收标准规范的规定。
- 6.2.7.5 物资储备区应视情况设计或预留防洪、排水设施。
- 6.2.7.6 物资可采用体育场馆实物储备、协议储备和政府应急物资保障等方式进行储备。对于不宜大量存储和不易长期保存的物资，主要通过协议储备和政府应急物资保障相结合方式满足应急避难需要。物资储备具体要求宜参考下列要求：
  - a) 食品储存按照每人每日 500g~900g 食品的标准进行储备；
  - b) 医疗药品、器材按 2%受伤者比率的需求量进行储备。

6.2.8 餐饮服务区

餐厅或其他全民健身综合服务用房等宜转换成餐饮服务区，餐饮服务区应具有供水和洗消设施，设置人员就餐区等或提供送餐服务。

6.2.9 临时教学区

贵宾用房、管理用房等宜转换为临时教学区，配置教具、电脑、屏幕显示器、桌椅板凳等设施设备。

6.2.10 卫生盥洗区

- 6.2.10.1 观众区和运动员用房内的卫生间、淋浴间等宜转换成卫生盥洗区。
- 6.2.10.2 卫生盥洗区应设置盥洗区、男女卫生间、男女淋浴间。
- 6.2.10.3 男厕宜每 20 人配备一个蹲位和一个小便斗，女厕宜每 10 人配备一个蹲位。
- 6.2.10.4 当体育场馆内已设置卫生间不满足应急避难人员需求时，可按可避难人员比例新增移动厕所，临时搭建的移动厕所应满足环境保护和卫生防疫要求。
- 6.2.10.5 室外设置临时性卫生间，其位置应位于应急避难场所主要风向的下风向位置，自然通风不良的应增设排风扇。

6.2.11 垃圾储运区

- 6.2.11.1 垃圾储运点、固定垃圾站、垃圾收集点等宜转换为垃圾储运区。

6.2.11.2 生活垃圾和医疗垃圾应分类处理。生活垃圾应按可回收垃圾、有害垃圾、厨余垃圾、其他垃圾四种进行分类处理；医疗垃圾应设置单独的存放点，严格进行医疗废物收集、运送、贮存、处置等工作。

6.2.11.3 垃圾储运区一个配置垃圾桶、垃圾车，配套垃圾清扫工具、垃圾袋等基本设备及物资。

6.2.11.4 具体要求包括但不限于以下方面：

- a) 垃圾收集设施应干、湿分离，采取通风、除湿、防蚊蝇等措施；
- b) 室外型场所的垃圾储运设施应位于应急宿住区下风向，并与应急宿住区保持 8 m 以上距离；
- c) 应急功能区出入口或附近应设置垃圾箱，医疗救治区应单独设置应急垃圾储运设施。

6.2.12 应急停车区

6.2.12.1 停车场宜转换成应急停车区，配置车辆停放场地、停车棚、交通管理等设施设备。

6.2.12.2 车辆停放场地的设置可利用避难场所内原有的停车位，也可利用避难场所周边 500 米范围内的停车场、停车位。

6.2.12.3 应急停车区应具有清晰的线路引导，设置交通标志，规划交通标线。

6.2.12.4 停车场车位指标大于 50 个时，出入口不得少于 2 个；大于 500 个时，出入口不得少于 3 个。

6.2.12.5 出入口之间的净距须大于 10 米，出入口宽度不得小于 7 米。

6.2.12.6 停车场内的停车面积应设置应急救护、应急救援、物资运输车辆专用停车位。

6.2.13 直升机起降区

6.2.13.1 室外广场或开阔无遮挡空地宜转换成直升机起降区，用于直升机临时起降停靠。

6.2.13.2 直升机起降区的使用面积、宽度及周边环境要求应按照 MH 5013 要求进行设置。

6.2.14 公共服务区

6.2.14.1 观众服务用房、其他全民健身综合服务用房或公共区域等宜转换成公共服务区。

6.2.14.2 公共服务区应与文化活动区、应急宿住区或临时教学区临近，设置问询台、母婴室、商品售卖点等。

6.2.15 文体活动区

观众服务用房、其他全民健身综合服务用房或公共区域等宜转换为图书阅览室或健身活动区，文化活动区宜根据配套服务保障需要搭设货架、健身器材设施等，配置图书、报刊、杂志、棋牌等物资，为受灾人员提供文化和健身活动的服务保障。

6.3 设施设备转换要求

6.3.1 应急供电

6.3.1.1 体育场馆内的市政供电设施应保障基本生活用电，急时调配汽应急备用电源或预留应急供电接口，满足应急避难场所内指挥管理、医疗救治等关键负荷用电需求。

6.3.1.2 应急备用电源宜采用室外防雨静音型箱式柴油发电机组或应急移动柴油发电车。柴油发电机组，在市电停电时，15s 内自动启动并供电，容量应满足所有一级负荷和二级负荷用电要求，应自带日用油箱，并留有供油接口，连续供电时间不小 24h。

6.3.1.3 应急供电接口具体要求应满足下列要求：

- a) 急时可直接与汽柴油发电机或应急发电车连接，保证断电时可随时启用；
- b) 各级配电柜（箱）的设计，应根据转换前后的需要预留足够容量和回路。

6.3.1.4 应急供电线路、插座、照明设备不存在裸露电线、短路风险,集中充电区域应远离易燃物。

6.3.2 应急供水

6.3.2.1 体育场馆内市政供水设施应保障基本生活用水,急时调配储水罐(袋)、应急水箱、净(滤)水器、供水车等,保障饮用及非饮用水量。

6.3.2.2 “三断”情况下应保障基本生活用水,可利用瓶装水、自备井、河道等提供紧急供水。

6.3.2.3 生活给水水质应符合 GB5749 的有关规定。

6.3.2.4 洗浴区生活热水系统宜采用集中供应系统。加热方式宜采用空气源热泵,当采用电热水器时,必须带有保证使用安全的装置。

6.3.2.5 集中热水供应系统水加热器的出水温度应为 60℃~65℃。当出水温度不应满足要求时,系统应设置灭菌消毒设施。配水点的温度不应低于 45℃。

6.3.2.6 应急宿住区应单独设置饮用水供水点,宜采用电开水器。

6.3.3 应急供暖

6.3.3.1 体育场馆内市政供暖设施应保障冬季室内取暖需要,急时调配电热毯、电暖器等,满足应急避难人员取暖需要。

6.3.3.2 室内温度宜控制在 18~28 摄氏度。

6.3.4 应急通讯

6.3.4.1 体育场馆内通讯设备应转换为应急通讯设施,增配卫星电话、对讲机、短波电台等通讯设备。

6.3.5 应急排污

6.3.5.1 体育场馆内排污设施应保障日常排污需求,平急转换时可按需增设污水井、化粪池等,急时调配污水吸运设备,保障应急排污需求。

6.3.5.2 应妥善处理废水、废弃物,满足卫生防护和环境安全要求。

6.3.5.3 排水系统应采取防止水封破坏的技术措施,漏水封应有补水措施,当附近有洗手盆时,可采用洗手盆排水给地漏水封补水方式。

6.3.5.4 新增设备和系统宜施工方便、快捷且便于后期拆除、恢复。

6.3.6 应急通风

6.3.6.1 体育场馆内换气扇、送风机、门窗等宜转换为应急通风设施,可视情况增加空气净化器等设备移除污染物和增加氧气含量。

6.3.6.2 通风空调系统中不应安装对人体有损害的臭氧、紫外线等消毒装置。

6.3.6.3 应急通风宜充分利用自然条件,合理组织自然通风。

6.3.6.4 采用自然通风时,平面布置应保证气流畅通,避免死角和短路,尽量减少风口和气流通路的阻力。

6.3.6.5 当采用机械通风时,新风量按不小于 30 m<sup>3</sup>/h 确定。

6.3.7 应急消防

6.3.7.1 体育场馆内应合理设置消防通道,配置消防设施和消防器材。

6.3.7.2 明显位置应设置安全疏散指示图,疏散指示图上应标明疏散路线、安全出口和疏散门、人员所在位置和必要的文字说明。

6.3.7.3 建筑灭火器应按照 GB 50140 进行配置。

6.3.7.4 消防用水量及消防通道应符合 GB 51143 要求。

6.3.7.5 在新增生活给水系统上设置消防软管卷盘，其布置应满足至少有 1 股水柱到达室内任何部位的要求。

6.3.8 无障碍设施

应结合建筑结构实际情况设置无障碍坡道、无障碍通道、无障碍楼梯、无障碍卫生间等设施 and 字幕等获取信息无障碍设备，无障碍设施按照GB 55019和GB 50763设计。

6.3.9 抢修抢建设施

抢修抢建设施宜利用体育场馆内原有可用工具设施进行转换，当需求无法满足时应新增或具备紧急调用能力。

6.3.10 安全保卫设施

体育场馆内现有安全保卫设施宜转换为应急避难场所安全保卫设施，当需求无法满足时应新增或具备紧急调用能力。

6.3.11 标志标识

6.3.11.1 应配置应急避难场所主标志、功能区标志、设施设备标志、指向标志等。

6.3.11.2 宜将体育场馆的标志标识与应急避难场所的设施设备标识融合设计或提前预留设置接口，合体育场馆内原有标志标识牌位置设置应急避难场所标志标识点位，方便平时与急时使用的快速切换。

附 录 A  
(资料性)  
体育场馆资源调查单

| 序号     | 调查指标项    | 调查内容 | 填写要求   | 调查指标解释                               | 实施方式 | 调查指标参考来源                                          |
|--------|----------|------|--------|--------------------------------------|------|---------------------------------------------------|
| 一、基本情况 |          |      |        |                                      |      |                                                   |
| 1      | 体育场馆名称   |      | (文字说明) | 指直接负责体育场地日常管理及运营并经有关部门批准正式使用的单位的全称。  | 资料调查 | FXPC/YJ G-10《公共服务设施调查技术规范》一附表 A07 公共服务设施(体育场馆)调查表 |
| 1      | 体育场馆详细地址 |      | (文字说明) | 填写所在地详细地址信息,包括所在乡镇村或街道(路)等,尽量精确到门牌号。 | 资料调查 | FXPC/YJ G-10《公共服务设施调查技术规范》一附表 A07 公共服务设施(体育场      |

|   |                  |                                                                                                                                                                                                                                              |            |                                                                                                                                            |                     |       |
|---|------------------|----------------------------------------------------------------------------------------------------------------------------------------------------------------------------------------------------------------------------------------------|------------|--------------------------------------------------------------------------------------------------------------------------------------------|---------------------|-------|
|   |                  |                                                                                                                                                                                                                                              |            |                                                                                                                                            |                     | 馆)调查表 |
| 2 | 场馆类型             | 按空间类型： <input type="checkbox"/> 体育场 <input type="checkbox"/> 体育馆<br>按体育项目： <input type="checkbox"/> 篮球馆 <input type="checkbox"/> 羽毛球馆 <input type="checkbox"/><br>游 泳 馆 <input type="checkbox"/> 健 身 房 <input type="checkbox"/> 其 他<br>_____ | (单选)       | 指体育场馆具体的类型，如按照空间类型分类的体育场、体育馆，或按照体育项目分类的篮球馆、羽毛球馆、游泳馆等。                                                                                      | 资 料 调<br>查/现场<br>勘察 | ——    |
| 3 | 观众容量             | 观众容量总数：_____人<br>室外体育场观众容量：_____人<br>室内体育馆观众容量：_____人                                                                                                                                                                                        | (文字<br>说明) | 指体育场馆的观众容量。                                                                                                                                | 资 料 调<br>查/现场<br>勘察 | ——    |
| 4 | 是否是室外型<br>应急避难场所 | <input type="checkbox"/> 是 <input type="checkbox"/> 否<br>若 是 ， 则 避 难 场 所 名 称 为 ：<br>_____                                                                                                                                                    | (单选)       | 指该体育场馆是否已经在《全国应急避难场所<br>辅助调度系统》中进行登记备案为室外型应急<br>避难场所，若已登记，则进一步说明应急避难<br>场所名称，需与系统中登记名称保持一致。                                                | 资 料 调<br>查          | ——    |
| 5 | 场馆整体情况           | 体育场馆总幢数：_____幢<br>室内训练/比赛场地（具有较大开敞空间）<br>总个数：_____个<br>室内场地总使用面积：_____平方米<br>室内场地座位看台总数（不可拆卸）：<br>_____位                                                                                                                                     | (文字<br>说明) | 指可用于灾时应急避难人员疏散安置的体育场<br>馆整体情况，包括总幢数、场地个数、使用面<br>积、看台总数等，其中，室内场地总使用面积=<br>所有场馆室内场地的“使用面积”之和。室内<br>场地座位看台总数（不可拆卸）=所有场馆室内<br>场地的不可拆卸的“看台数”之和。 | 资 料 调<br>查/现场<br>勘察 | ——    |
| 6 | 场馆详情             | 若体育场馆幢数≥2个，下面分别填写：<br>体育场馆名称：_____<br>室内训练/比赛场地（具有较大开敞空间）<br>总个数：_____个<br>场地使用总面积：_____ m <sup>2</sup><br>若活动场地≥2个，下面分别填写：<br>场地1名称：_____<br>场地1所在楼层：_____层<br>场地1用途：_____                                                                  | (文字<br>说明) | 指单个体育场馆的详细配置情况，包括场馆建<br>筑名称、场地个数、场地使用总面积，其中，<br>场地使用总面积为所有场地使用面积与看台拆<br>卸后面积之和。                                                            | 资 料 调<br>查/现场<br>勘察 | ——    |

|   |                    |                                                                                                                                                                                                                                                                                                                                                                                                                                                                                                                                                                                                         |        |                                                                 |           |    |
|---|--------------------|---------------------------------------------------------------------------------------------------------------------------------------------------------------------------------------------------------------------------------------------------------------------------------------------------------------------------------------------------------------------------------------------------------------------------------------------------------------------------------------------------------------------------------------------------------------------------------------------------------|--------|-----------------------------------------------------------------|-----------|----|
|   |                    | 场地1使用面积：_____ m <sup>2</sup><br>场地1是否有配套座位看台： <input type="checkbox"/> 是 <input type="checkbox"/> 否，<br>若有，则看台数：____位；<br>是否能伸缩/拆卸： <input type="checkbox"/> 是 <input type="checkbox"/> 否，若可拆卸，<br>则看台拆卸后面积：_____ m <sup>2</sup><br>(注：若场地≥2个，需新增)                                                                                                                                                                                                                                                                                                                                                      |        |                                                                 |           |    |
| 7 | 地下空间（注：非全封闭型的地下空间） | 所在位置：_____<br>地下____层<br>建筑面积：_____ m <sup>2</sup><br>现状用途： <input type="checkbox"/> 停车场 车位数_____个 <input type="checkbox"/><br>仓储用房 <input type="checkbox"/> 其他_____<br>是否是人防工程设施：<br><input type="checkbox"/> 未知 <input type="checkbox"/> 是 <input type="checkbox"/> 否<br>防护等级： <input type="checkbox"/> 甲类 <input type="checkbox"/> 乙类<br>防常规武器抗力级别：<br><input type="checkbox"/> 5级 <input type="checkbox"/> 6级<br>防核武器抗力级别：<br><input type="checkbox"/> 4级 <input type="checkbox"/> 4B级 <input type="checkbox"/> 5级<br><input type="checkbox"/> 6级 <input type="checkbox"/> 6B级<br>(注：若地下空间数≥2个，需新增) | (文字说明) | 指地下可用空间所在位置，具体描述其依附在哪个建筑楼体下进行的设计，包括地下层数、建筑面积，是否是人防工程设施及防护等级等。   | 资料调查/现场勘察 | —— |
| 8 | 对外开放情况             | <input type="checkbox"/> 不开放 <input type="checkbox"/> 部分时段开放 <input type="checkbox"/> 全天开放                                                                                                                                                                                                                                                                                                                                                                                                                                                                                                              | (单选)   | 指体育场馆对社会公众开放情况，如不开放、部分时段开放、全天开放。                                | 资料调查/现场勘察 | —— |
| 9 | 室外空旷场地面积           | <input type="checkbox"/> 室外空旷场地 _____ 处<br>_____平方米<br>场地1名称：_____ (简称)                                                                                                                                                                                                                                                                                                                                                                                                                                                                                                                                 | (文字说明) | 指可用于急时应急避难人员疏散安置的场馆室外空旷区域面积，主要指室外运动场地、广场等空旷区域， <b>不含停车位区域</b> 。 | 资料调查/现场勘察 | —— |



|        |              |                                                                                                                                                                     |              |                                                           |                     |                                                 |
|--------|--------------|---------------------------------------------------------------------------------------------------------------------------------------------------------------------|--------------|-----------------------------------------------------------|---------------------|-------------------------------------------------|
|        |              | 场地1面积：_____ m <sup>2</sup><br>(注：若场地≥2个，需新增)                                                                                                                        |              |                                                           |                     |                                                 |
| 10     | 出入口数量        | ____个                                                                                                                                                               | /            | 指体育场馆出入口数量                                                | 资 料 调<br>查/现场<br>勘察 | DB11/T<br>2142《应急<br>避 难 场 所<br>场 址 及 配<br>套设施》 |
| 11     | 出入口方向        | _____                                                                                                                                                               | ( 文 字<br>说明) | 指体育场馆出入口门的方向，如南门、北门等。                                     | 资 料 调<br>查/现场<br>勘察 | DB11/T<br>2142《应急<br>避 难 场 所<br>场 址 及 配<br>套设施》 |
| 12     | 出入口道路分<br>布图 | <input type="checkbox"/> 出入口道路分布图<br><input type="checkbox"/> 现场效果图                                                                                                 | ( 多 选 )      | 指体育场馆周边主干道、次干道分布相关资料<br>情况。                               | 资 料 调<br>查          | ——                                              |
| 13     | 功能布局         | <input type="checkbox"/> 无资料 <input type="checkbox"/> 功能分布图<br><input type="checkbox"/> 示意效果图 <input type="checkbox"/> 应急疏散示意图 <input type="checkbox"/> 其<br>他_____ | ( 多 选 )      | 指体育场馆是否具备总体的功能分布图、示意<br>效果图、应急疏散示意图等，便于直观概览场<br>馆的总体分布情况。 | 资 料 调<br>查          | ——                                              |
| 14     | 周边河湖情况       | 周边是否有河/湖： <input type="checkbox"/> 河道 <input type="checkbox"/> 湖水<br>距离河道_____米，名称：_____<br>距离湖水_____米，名称：_____                                                     | ( 多 选 )      | 周边河道分布情况。                                                 | 资 料 调<br>查/现场<br>勘察 | ——                                              |
| 15     | 预留供水设施<br>接口 | 是否预留水管接口： <input type="checkbox"/> 是 <input type="checkbox"/> 否                                                                                                     | ( 单 选 )      | 指体育场馆预留水管接口或水管龙头等可接入<br>应急供水车等应急水源情况。                     | 资 料 调<br>查/现场<br>勘察 | ——                                              |
| 16     | 预留供电设施<br>接口 | 是否预留配电箱接口： <input type="checkbox"/> 是 <input type="checkbox"/> 否                                                                                                    | ( 单 选 )      | 指体育场馆预留配电箱接口可接入柴油发电机<br>组或应急供电车等应急电源情况。                   | 资 料 调<br>查/现场<br>勘察 | ——                                              |
| 二、场址安全 |              |                                                                                                                                                                     |              |                                                           |                     |                                                 |

|    |         |                                                                                                                                                                                                                                                               |      |                                                                                   |           |                                                                     |
|----|---------|---------------------------------------------------------------------------------------------------------------------------------------------------------------------------------------------------------------------------------------------------------------|------|-----------------------------------------------------------------------------------|-----------|---------------------------------------------------------------------|
| 17 | ★洪涝灾害风险 | 是否邻近河道（500m范围内）：<br><input type="checkbox"/> 是 <input type="checkbox"/> 否<br>是否处于洪泛区/蓄滞洪区：<br><input type="checkbox"/> 是 <input type="checkbox"/> 否，若处于洪泛区/蓄滞洪区内，是否开展过相关洪水影响评价工作且审查结果符合相关建设要求： <input type="checkbox"/> 是 <input type="checkbox"/> 否 其他：_____ | （单选） | 指体育场馆是否邻近河道，是否处于洪泛区、蓄滞洪区，若处于洪泛区、蓄滞洪区范围内，则进一步调查是否开展过相关洪水影响评价工作且审查结果符合相关建设要求。       | 资料调查/现场勘察 | GB 55028<br>《特殊设施工程项目规范》<br>《水利部关于加强非防洪建设项目洪水影响评价工作的通知》水汛（2017）359号 |
| 18 | ★地震灾害风险 | 是否避开地震断裂带等威胁区域： <input type="checkbox"/> 是 <input type="checkbox"/> 否                                                                                                                                                                                         | （单选） | 指体育场馆是否避开地震断裂等威胁区域。                                                               | 资料调查      | GB 50413<br>《城市抗震防灾规划标准》                                            |
| 19 | ★地质灾害风险 | 是否避开地质灾害易发地段影响区： <input type="checkbox"/> 是 <input type="checkbox"/> 否<br>若处于影响区内，则是否制定相关防护应对措施： <input type="checkbox"/> 是，并且实施防治措施后满足避险场地选址要求 <input type="checkbox"/> 否                                                                                    | （单选） | 指体育场馆是否避开地质灾害易发地段影响区，避开可能发生滑坡、崩塌、地陷、地裂、泥石流等严重地质灾害的地区。若处于影响区内，则进一步调查是否已制定相关防护应对措施。 | 资料调查      | GB 51143<br>《防灾避难场所设计规范》                                            |
| 20 | ★森林火灾风险 | 是否邻近林区（500m范围内）：<br><input type="checkbox"/> 是 <input type="checkbox"/> 否，若邻近林区是否开展了防火隔离措施： <input type="checkbox"/> 是 <input type="checkbox"/> 否                                                                                                             | （单选） | 指体育场馆是否邻近林区，若邻近林区，则进一步调查是否做好防火措施。                                                 | 资料调查/现场勘察 | ——                                                                  |
| 21 | 易燃易爆风险  | 是否邻近易燃易爆危险源（≤1km）：<br><input type="checkbox"/> 无 <input type="checkbox"/> 工厂 <input type="checkbox"/> 仓库 <input type="checkbox"/> 供气厂 <input type="checkbox"/> 储                                                                                              | （单选） | 指体育场馆周边易燃易爆物分布情况，包含易燃易爆工厂、仓库、供气厂、储气站等重大火                                          | 资料调查/现场   | GB 51143<br>《防灾避                                                    |

|        |          |                                                                                                                                                                       |        |                                                   |           |                          |
|--------|----------|-----------------------------------------------------------------------------------------------------------------------------------------------------------------------|--------|---------------------------------------------------|-----------|--------------------------|
|        |          | 气站 <input type="checkbox"/> 其他_____                                                                                                                                   |        | 灾或爆炸危险源，需调查与上述危险源的间距及防火隔离带设置情况。                   | 勘察        | 难场所设计规范》                 |
| 22     | 其他潜在风险调查 | 若邻近周围易燃建筑等一般火灾危险源，则与火灾危险源之间防火隔离设置情况：<br><input type="checkbox"/> 无 <input type="checkbox"/> ＜30m隔离带 <input type="checkbox"/> ≥30m隔离带                                  | (单选)   | 指体育场馆位于长输天然气管道、输油管道铺设区情况，是否已避开。                   | 资料调查/现场勘察 | GB 51143<br>《防灾避难场所设计规范》 |
| 三、设防情况 |          |                                                                                                                                                                       |        |                                                   |           |                          |
| 23     | ★抗震设防    | <input type="checkbox"/> 6度设防 <input type="checkbox"/> 7度设防 <input type="checkbox"/> 8度设防 <input type="checkbox"/> 9度设防                                               | (单选)   | 指体育场馆建筑的抗震设防烈度等级。                                 | 资料调查      | GB/T 50011<br>《建筑抗震设计标准》 |
| 24     | 防雷设防     | <input type="checkbox"/> 第一类 <input type="checkbox"/> 第二类 <input type="checkbox"/> 第三类                                                                                | (单选)   | 指体育场馆建筑的防雷分类。                                     | 资料调查      | GB 50057<br>《建筑物防雷设计规范》  |
| 25     | 防火设防     | 室外通道及消防空间、室内消防措施是否符合建筑场地人员合理疏散的要求，及是否定期开展安全消防检查： <input type="checkbox"/> 是 <input type="checkbox"/> 否                                                                | (单选)   | 指室外通道及消防空间、室内消防措施是否符合建筑场地人员合理疏散的要求，以及是否开展了安全消防检查。 | 现场勘察      | ——                       |
| 26     |          | 场馆是否开展火灾安全隐患相关消防检查工作： <input type="checkbox"/> 是 <input type="checkbox"/> 否，若是，则相关检查报告名称_____且结果合格并符合运营要求情况： <input type="checkbox"/> 合格 <input type="checkbox"/> 不合格 | (文字说明) | 指调查体育场馆内火灾隐患相关消防安全检查情况。                           | 资料调查/现场勘察 | ——                       |
| 27     | ★防洪要求    | 是否处于所在区的流域超标准洪水淹没范围： <input type="checkbox"/> 是 <input type="checkbox"/> 否                                                                                            | (单选)   | 是指体育场馆室内建筑场地是否处于所在区的流域超标准洪水（100年一遇）淹没范围内，若        | 资料调查      | ——                       |

|            |        |                                                                                                                                                                                                                     |      |                                                                  |               |                                                                                    |
|------------|--------|---------------------------------------------------------------------------------------------------------------------------------------------------------------------------------------------------------------------|------|------------------------------------------------------------------|---------------|------------------------------------------------------------------------------------|
|            |        | 若是，则场所所在地的防洪标准设计是否符合所在区域的防洪标准要求： <input type="checkbox"/> 是 <input type="checkbox"/> 否                                                                                                                              |      | 处于，则进一步调查场所所在地的防洪标准设计是否符合所在区域的防洪标准要求。                            |               |                                                                                    |
| 28         | 排水要求   | 是否邻近典型历史内涝点（500m范围内）：<br><input type="checkbox"/> 是 <input type="checkbox"/> 否<br>场地及周边区域的排水设计是否符合所在区域的排水标准要求： <input type="checkbox"/> 是 <input type="checkbox"/> 否                                                | （单选） | 指调查体育场馆室内建筑场地是否邻所在区域的典型历史内涝点，以及室内建筑场地及其周边区域的排水设计是否符合所在区域的排水标准要求。 | 资 料 调 查       | _____                                                                              |
| 四、结构安全     |        |                                                                                                                                                                                                                     |      |                                                                  |               |                                                                                    |
|            | 结构安全情况 | 场馆是否开展结构安全相关检查/专业鉴定工作： <input type="checkbox"/> 是 <input type="checkbox"/> 否 <input type="checkbox"/> 未知，若是，则相关检 查 / 专 业 鉴 定 报 告 名 称 _____ 且结果合格并符合运营要求情况： <input type="checkbox"/> 合格 <input type="checkbox"/> 不合格 | （单选） | 指调查体育场馆是否开展结构安全相关检查/专业鉴定工作情况。                                    | 资 料 调 查       | GB 50292-2015《民用建筑可靠性鉴定标准》、GB 50023-2009《建筑抗震鉴定标准》、《房屋结构综合安全性鉴定标准》（DB11/T637-2024） |
| 五、配套设施设备情况 |        |                                                                                                                                                                                                                     |      |                                                                  |               |                                                                                    |
| 30         | 医疗救治设施 | <input type="checkbox"/> 无 <input type="checkbox"/> 医务室 <input type="checkbox"/> 其他_____                                                                                                                            | （多选） | 指是否具备临时医疗救治点的能力及名称，如体育场馆医务室等。                                    | 资 料 调 查/现场 勘察 | YJ/T 26-2024《应急避                                                                   |

|    |  |                                                                                                                                        |      |                                   |                     |                                                                                                            |
|----|--|----------------------------------------------------------------------------------------------------------------------------------------|------|-----------------------------------|---------------------|------------------------------------------------------------------------------------------------------------|
|    |  |                                                                                                                                        |      |                                   |                     | 难场所 设<br>施 设 备 及<br>物资配置》<br>DB11/T<br>2142《应急<br>避 难 场 所<br>场 址 及 配<br>套设施》                               |
| 31 |  | <input type="checkbox"/> 无 <input type="checkbox"/> 医疗急救包/箱 ____个 <input type="checkbox"/> 担架<br>____个 <input type="checkbox"/> 其他____ | (多选) | 指是否具备储备医疗救治物资，如医疗急救包/<br>箱、担架等储备。 | 资 料 调<br>查/现场<br>勘察 | YJ/T<br>26-2024<br>《 应 急 避<br>难场所 设<br>施 设 备 及<br>物资配置》<br>DB11/T<br>2142《应急<br>避 难 场 所<br>场 址 及 配<br>套设施》 |
| 32 |  | <input type="checkbox"/> 无 <input type="checkbox"/> 口罩 <input type="checkbox"/> 消毒液 <input type="checkbox"/> 其他____                    | (多选) | 指是否储备卫生防疫用品，如口罩、消毒液等。             | 资 料 调<br>查/现场<br>勘察 | YJ/T<br>26-2024<br>《 应 急 避<br>难场所 设<br>施 设 备 及<br>物资配置》<br>DB11/T<br>2142《应急                               |

|    |      |                                                                                                                                                                                                                                                              |      |                                         |                     |                                                                                                              |
|----|------|--------------------------------------------------------------------------------------------------------------------------------------------------------------------------------------------------------------------------------------------------------------|------|-----------------------------------------|---------------------|--------------------------------------------------------------------------------------------------------------|
|    |      |                                                                                                                                                                                                                                                              |      |                                         |                     | 避 难 场 所<br>场 址 及 配<br>套 设 施》                                                                                 |
| 33 | 通讯设施 | <input type="checkbox"/> 无 <input type="checkbox"/> 广播设备 <input type="checkbox"/> 图像监控 <input type="checkbox"/> 有线网络 <input type="checkbox"/> 无线网络 <input type="checkbox"/> 对讲机_____个 <input type="checkbox"/> 应急卫星电话_____个 <input type="checkbox"/> 其他_____ | (多选) | 指是否具备广播设备、图像监控、有线网络、无线网络、对讲机、应急卫星电话等设备。 | 资 料 调<br>查/现场<br>勘察 | YJ/T<br>26-2024<br>《 应 急 避<br>难场所 设<br>施 设 备 及<br>物资配置》<br>DB11/T<br>2142《应急<br>避 难 场 所<br>场 址 及 配<br>套 设 施》 |
| 34 | 供水设施 | <input type="checkbox"/> 市政供水 <input type="checkbox"/> 水井 <input type="checkbox"/> 储水罐<br><input type="checkbox"/> 储水桶 <input type="checkbox"/> 其他_____                                                                                                      | (多选) | 指是否具备市政供水、水井、储水罐、储水桶等供水方式。              | 资 料 调<br>查/现场<br>勘察 | YJ/T<br>26-2024<br>《 应 急 避<br>难场所 设<br>施 设 备 及<br>物资配置》<br>DB11/T<br>2142《应急<br>避 难 场 所<br>场 址 及 配<br>套 设 施》 |
| 35 | 供电设施 | 市政供电 ( <input type="checkbox"/> 单路供电 <input type="checkbox"/> 双路供电 <input type="checkbox"/> 多路供电 ) <input type="checkbox"/> 发电车   _____辆 <input type="checkbox"/> 发电                                                                                         | (多选) | 指供电系统是否为市政供电，是否具备发电车、发电机组、应急电源等设施。      | 资 料 调<br>查/现场       | YJ/T<br>26-2024                                                                                              |

|    |        |                                                                                                                               |      |                                    |                     |                                                                                                            |
|----|--------|-------------------------------------------------------------------------------------------------------------------------------|------|------------------------------------|---------------------|------------------------------------------------------------------------------------------------------------|
|    |        | 机组（）千瓦 <input type="checkbox"/> 应急电源 ____个                                                                                    |      |                                    | 勘察                  | 《 应 急 避<br>难场所 设<br>施 设 备 及<br>物资配置》<br>DB11/T<br>2142《应急<br>避 难 场 所<br>场 址 及 配<br>套设施》                    |
| 36 | 应急照明设施 | <input type="checkbox"/> 无 <input type="checkbox"/> 具备应急照明灯 ____个                                                             | （单选） | 指是否具备应急照明设备。                       | 资 料 调<br>查/现场<br>勘察 | YJ/T<br>26-2024<br>《 应 急 避<br>难场所 设<br>施 设 备 及<br>物资配置》<br>DB11/T<br>2142《应急<br>避 难 场 所<br>场 址 及 配<br>套设施》 |
| 37 | 温度控制设施 | <input type="checkbox"/> 暖气片 <input type="checkbox"/> （冷暖）空调 <input type="checkbox"/> 电风扇 <input type="checkbox"/><br>其他_____ | （多选） | 指实现控制室内温度的设施，如暖气片、（冷<br>暖）空调、电风扇等。 | 资 料 调<br>查/现场<br>勘察 | YJ/T<br>26-2024<br>《 应 急 避<br>难场所 设<br>施 设 备 及<br>物资配置》<br>DB11/T                                          |

|    |        |                                                                                                                                                      |      |                                        |           |                                                                         |
|----|--------|------------------------------------------------------------------------------------------------------------------------------------------------------|------|----------------------------------------|-----------|-------------------------------------------------------------------------|
|    |        |                                                                                                                                                      |      |                                        |           | 2142《应急避难场所场址及配套设施》                                                     |
| 38 | 消防设施   | <input type="checkbox"/> 灭火器 <input type="checkbox"/> 消火栓 <input type="checkbox"/> 消防给水系统 <input type="checkbox"/> 火灾自动报警器                           | (多选) | 指是否具备灭火器、消火栓、消防给水系统、火灾自动报警器等相关设施。      | 资料调查/现场勘察 | YJ/T<br>26-2024<br>《应急避难场所设施设备 & 物资配置》<br>DB11/T<br>2142《应急避难场所场址及配套设施》 |
| 39 | 停车设施   | <input type="checkbox"/> 无 <input type="checkbox"/> 停车场：____个<br>停车车位数：____位<br><input type="checkbox"/> 地上____位<br><input type="checkbox"/> 地下____位 | (单选) | 指校园内是否具备日常机动车辆停放的停车位，处于地上还是地下，以及停车车位数。 | 资料调查/现场勘察 | YJ/T<br>26-2024<br>《应急避难场所设施设备 & 物资配置》<br>DB11/T<br>2142《应急避难场所场址及配套设施》 |
| 40 | 餐饮服务设施 | <input type="checkbox"/> 无 <input type="checkbox"/> 厨房 <input type="checkbox"/> 就餐区 <input type="checkbox"/> 清洁消毒设                                   | (多选) | 指是否具备厨房、就餐区、清洁消毒设备、食                   | 资料调       | YJ/T                                                                    |



|    |       |                                                                                                                                                                   |      |                                                                 |                     |                                                                                                           |
|----|-------|-------------------------------------------------------------------------------------------------------------------------------------------------------------------|------|-----------------------------------------------------------------|---------------------|-----------------------------------------------------------------------------------------------------------|
|    |       | 备 <input type="checkbox"/> 食物储备设备 <input type="checkbox"/> 通风排烟及废弃物排放设备                                                                                           |      | 物储备设备、通风排烟及废弃物排放设备等。                                            | 查/现场<br>勘察          | 26-2024<br>《 应 急 避<br>难场所 设<br>施 设备 及<br>物资配置》<br>DB11/T<br>2142《应急<br>避 难 场 所<br>场 址 及 配<br>套设施》         |
| 41 | 物资储备  | 是否储备物资： <input type="checkbox"/> 是 <input type="checkbox"/> 否<br>若是，则储备方式： <input type="checkbox"/> 实物储备 <input type="checkbox"/> 协议<br>储备<br>实物储备量能满足：_____人/d食用 | (单选) | 指体育场馆餐厅是否具备餐饮食品类物资储备<br>及其储备方式、能满足的人员食用情况，如能<br>够满足3000人/5d食用量。 | 资 料 调<br>查/现场<br>勘察 | YJ/T<br>26-2024<br>《 应 急 避<br>难场所 设<br>施 设备 及<br>物资配置》<br>DB11/T<br>2142《应急<br>避 难 场 所<br>场 址 及 配<br>套设施》 |
| 42 | 无障碍设施 | <input type="checkbox"/> 无障碍坡道 <input type="checkbox"/> 无障碍通道 <input type="checkbox"/> 无障碍<br>楼梯 <input type="checkbox"/> 无障碍卫生间 <input type="checkbox"/> 其他_____ | (多选) | 指是否具备无障碍坡道、无障碍通道、无障碍<br>楼梯、无障碍卫生间等设施。                           | 资 料 调<br>查/现场<br>勘察 | YJ/T<br>26-2024<br>《 应 急 避<br>难场所 设<br>施 设备 及<br>物资配置》                                                    |

|    |        |                                                                                                                                                       |      |                             |                     |                                                                                                              |
|----|--------|-------------------------------------------------------------------------------------------------------------------------------------------------------|------|-----------------------------|---------------------|--------------------------------------------------------------------------------------------------------------|
|    |        |                                                                                                                                                       |      |                             |                     | DB11/T<br>2142《应急<br>避 难 场 所<br>场 址 及 配<br>套 设 施》                                                            |
| 43 | 室内通风设施 | <input type="checkbox"/> 自然通风 <input type="checkbox"/> 新风设备通风                                                                                         | (单选) | 指是否具备室内通风设施。                | 资 料 调<br>查/现场<br>勘察 | YJ/T<br>26-2024<br>《 应 急 避<br>难场所 设<br>施 设 备 及<br>物资配置》<br>DB11/T<br>2142《应急<br>避 难 场 所<br>场 址 及 配<br>套 设 施》 |
| 44 | 公共服务设施 | <input type="checkbox"/> 无 <input type="checkbox"/> 售货点 <input type="checkbox"/> 洗衣房 <input type="checkbox"/> 警卫室 <input type="checkbox"/><br>其他_____ | (多选) | 指是否有售货站、洗衣房、警卫室等公共服务<br>设施。 | 资 料 调<br>查/现场<br>勘察 | YJ/T<br>26-2024<br>《 应 急 避<br>难场所 设<br>施 设 备 及<br>物资配置》<br>DB11/T<br>2142《应急<br>避 难 场 所<br>场 址 及 配<br>套 设 施》 |

| 六、周边环境情况 |                         |                                                                                                                                                                                                                                                                                                                                                                                                                  |             |                                                                                           |                     |                                                   |
|----------|-------------------------|------------------------------------------------------------------------------------------------------------------------------------------------------------------------------------------------------------------------------------------------------------------------------------------------------------------------------------------------------------------------------------------------------------------|-------------|-------------------------------------------------------------------------------------------|---------------------|---------------------------------------------------|
| 45       | 周边交通情况                  | <input type="checkbox"/> 是 <input type="checkbox"/> 否                                                                                                                                                                                                                                                                                                                                                            | (单选)        | 指体育场馆周边是否有主干道                                                                             | 资 料 调<br>查/现场<br>勘察 | DB11/T<br>2142《应急<br>避 难 场 所<br>场 址 及 配<br>套 设 施》 |
| 46       |                         | _____条                                                                                                                                                                                                                                                                                                                                                                                                           | (文 字<br>说明) | 指体育场馆周边主干道数量                                                                              | 资 料 调<br>查/现场<br>勘察 |                                                   |
| 47       |                         | <input type="checkbox"/> 是 <input type="checkbox"/> 否                                                                                                                                                                                                                                                                                                                                                            | (单选)        | 指体育场馆周边是否有次干道                                                                             | 资 料 调<br>查/现场<br>勘察 |                                                   |
| 48       |                         | _____条                                                                                                                                                                                                                                                                                                                                                                                                           | (文 字<br>说明) | 指体育场馆周边次干道数量                                                                              | 资 料 调<br>查/现场<br>勘察 |                                                   |
| 49       | 周 边 环 境 情 况<br>(≤1.5公里) | <input type="checkbox"/> 是 <input type="checkbox"/> 否<br>若是,则避难场所_____个其中, <input type="checkbox"/> 室内__个 <input type="checkbox"/> 室外____个<br>避难场所名称: _____                                                                                                                                                                                                                                                      | (单选)        | 指体育场馆周边是否有应急避难场所,如有,则说明避难场所数量、类型、名称信息。                                                    | 现 场 勘<br>察          | _____                                             |
| 50       |                         | <input type="checkbox"/> 是 <input type="checkbox"/> 否<br>若是,则 <input type="checkbox"/> 医院_____个<br>医院类型:( <input type="checkbox"/> 综合医院 <input type="checkbox"/> 中医医院 <input type="checkbox"/> 中西医结合医院 <input type="checkbox"/> 民族医院 <input type="checkbox"/> 专科医院 <input type="checkbox"/> 护理院)<br>医院名称: _____<br><br><input type="checkbox"/> 卫生室_____个<br>卫生室名称: _____<br><input type="checkbox"/> 社区医院_____个 | (单选)        | 指体育场馆周边是否有医院、卫生室或者社区医院,如有,则说明对应数量、类型及名称。其中,医院类型(包含①综合医院;②中医医院;③中西医结合医院;④民族医院;⑤专科医院;⑥护理院)。 | 现 场 勘<br>察          | _____                                             |

|                   |  |                                                                                                                  |      |                                                  |         |       |
|-------------------|--|------------------------------------------------------------------------------------------------------------------|------|--------------------------------------------------|---------|-------|
|                   |  | 社区医院名称：_____                                                                                                     |      |                                                  |         |       |
| 51                |  | <input type="checkbox"/> 是 <input type="checkbox"/> 否<br>若是，则消防站_____个<br>消防站名称：_____                            | (单选) | 指周边是否有消防站点，若有，则说明消防站的数量、名称信息。                    | 现 场 勘 察 | _____ |
| 52                |  | <input type="checkbox"/> 是 <input type="checkbox"/> 否<br>若是，则物资储备库_____个<br>储备库名称：_____<br>超市_____个<br>超市名称_____ | (单选) | 指周边是否有具备物资储备性质的储备库、仓库点或超市等，若有，则说明储备库及超市的数量、名称信息。 | 现 场 勘 察 | _____ |
| 53                |  | <input type="checkbox"/> 是 <input type="checkbox"/> 否<br>若是，则派出所_____个<br>派出所名称：_____                            | (单选) | 指周边是否有派出所，若有，则说明派出所的数量、名称信息。                     | 现 场 勘 察 | _____ |
| 54                |  | <input type="checkbox"/> 是 <input type="checkbox"/> 否<br>若是，则小区（村）_____个<br>小区（村）名称：_____                        | (单选) | 指周边是否有小区（村），若有则说明小区（村）的数量、名称信息。                  | 现 场 勘 察 | _____ |
| 55                |  | <input type="checkbox"/> 是 <input type="checkbox"/> 否<br>若是，则通讯铁塔（基站）_____个<br>隶属运营商：_____                       | (单选) | 指周边是否有铁塔（基站），若有，则说明数量、隶属运营商信息。                   | 现 场 勘 察 | _____ |
| 注：标注“★”的指标为“关键指标” |  |                                                                                                                  |      |                                                  |         |       |

附 录 B  
(资料性)  
体育场馆资源评估单

| 序号       | 单 项<br>评 估<br>内 容 | 评估<br>指标项 | 指标要求                                           | 评估方法        | 评估档级判定规则         |                |              | 指标评估<br>档级结果                                                                     | 评估要求参考依据                                           |
|----------|-------------------|-----------|------------------------------------------------|-------------|------------------|----------------|--------------|----------------------------------------------------------------------------------|----------------------------------------------------|
|          |                   |           |                                                |             | 符 合<br>(A)       | 部 分 符 合<br>(B) | 不 符 合<br>(C) |                                                                                  |                                                    |
| 一、结构安全风险 |                   |           |                                                |             |                  |                |              |                                                                                  |                                                    |
| 1        | 结 构<br>安 全<br>风险  | ★结构承载力安全  | 场馆建筑开展结构安全相关检查/专业鉴定工作，且相关检查/专业鉴定报告结果合格并符合运营要求。 | 调查结果分析、专家会商 | 符 合<br>指 标<br>要求 | /              | 不符合指标要求      | <input type="checkbox"/> A <input type="checkbox"/> B <input type="checkbox"/> C | GB 50292-2015《民用建筑可靠性鉴定标准》、GB 50023-2009《建筑抗震鉴定标准》 |
| 二、场址安全   |                   |           |                                                |             |                  |                |              |                                                                                  |                                                    |
| 2        | 自 然<br>灾 害<br>风险  | ★洪涝灾害风险   | 避开洪涝易发地段。若未避开，则开展了相关洪水影响评价工作且审查结果符合建设要求。       | 调查结果分析、专家会商 | 符 合<br>指 标<br>要求 | /              | 不符合指标要求      | <input type="checkbox"/> A <input type="checkbox"/> B <input type="checkbox"/> C | GB 55028《特殊设施工程项目规范》                               |
| 3        |                   | ★地震灾害风险   | 避开地震断裂带等威胁区。                                   | 调查结果分析、专家会商 | 符 合<br>指 标<br>要求 | /              | 不符合指标要求      | <input type="checkbox"/> A <input type="checkbox"/> B <input type="checkbox"/> C | DB11/T 2142《应急避难场所 场址及配套设施》、GB 50413《城市抗震防灾规划标准》   |
| 4        |                   | ★地质灾害风险   | 避开地质灾害易发地段影响区。                                 | 调查结果分析、专家会商 | 符 合<br>指 标       | /              | 不符合指标要求      | <input type="checkbox"/> A <input type="checkbox"/> B <input type="checkbox"/> C | GB 51143《防灾避难场所设计规范》                               |

|   |        |         |                                                                                          |             |        |   |         |                                                                                  |                      |
|---|--------|---------|------------------------------------------------------------------------------------------|-------------|--------|---|---------|----------------------------------------------------------------------------------|----------------------|
|   |        |         |                                                                                          |             | 要求     |   |         |                                                                                  |                      |
| 5 |        | ★森林火灾风险 | 避开森林火灾风险影响区或做好防火措施。                                                                      | 调查结果分析、专家会商 | 符合指标要求 | / | 不符合指标要求 | <input type="checkbox"/> A <input type="checkbox"/> B <input type="checkbox"/> C | GB 51143《防灾避难场所设计规范》 |
| 6 | 事故灾难风险 | 易燃易爆风险  | 避开易燃易爆工厂、仓库、供气厂、储气站等重大火灾或爆炸危险源，避开距离不小于1000m。若邻近则需设置不小于30m的防火隔离带。                         | 调查结果分析、专家会商 | 符合指标要求 | / | 不符合指标要求 | <input type="checkbox"/> A <input type="checkbox"/> B <input type="checkbox"/> C | GB 51143《防灾避难场所设计规范》 |
| 7 |        | 其他潜在风险  | 避开长输天然气管道、输油管道，或采取安全防护措施。                                                                | 调查结果分析、专家会商 | 符合指标要求 | / | 不符合指标要求 | <input type="checkbox"/> A <input type="checkbox"/> B <input type="checkbox"/> C | GB 55028《特殊设施工程项目规范》 |
| 8 | 设防要求   | ★抗震设防   | 针对特大型体育场，大型、观众容量很多的中型体育场和体育馆（含游泳馆），用作地震避难场所抗震设防不低于重点设防类；<br>非地震避难场所抗震设防符合GB/T 50011相关要求。 | 调查结果分析、专家会商 | 符合指标要求 | / | 不符合指标要求 | <input type="checkbox"/> A <input type="checkbox"/> B <input type="checkbox"/> C | GB/T 50011《建筑抗震设计标准》 |
| 9 |        | 防雷设防    | 符合建筑物防雷设计要求。                                                                             | 调查结果分析、专家会商 | 符合指标要求 | / | 不符合指标要求 | <input type="checkbox"/> A <input type="checkbox"/> B <input type="checkbox"/> C | GB 50057《建筑物防雷设计规范》  |

|              |                      |                                                                                                                                                                                               |                                            |             |            |           |         |                                                                                  |                             |
|--------------|----------------------|-----------------------------------------------------------------------------------------------------------------------------------------------------------------------------------------------|--------------------------------------------|-------------|------------|-----------|---------|----------------------------------------------------------------------------------|-----------------------------|
| 10           |                      | 防火设防                                                                                                                                                                                          | 室外通道及消防空间、室内消防措施应符合建筑场地人员合理疏散的要求。          | 调查结果分析、专家会商 | 符合指标要求     | /         | 不符合指标要求 | <input type="checkbox"/> A <input type="checkbox"/> B <input type="checkbox"/> C | ——                          |
| 11           |                      | ★防洪要求                                                                                                                                                                                         | 针对处于流域超标准洪水淹没范围内的场所，其防洪标准设计应符合所在区域的防洪标准要求。 | 调查结果分析、专家会商 | 符合指标要求     | /         | 不符合指标要求 | <input type="checkbox"/> A <input type="checkbox"/> B <input type="checkbox"/> C | ——                          |
| 12           |                      | 排水要求                                                                                                                                                                                          | 避开所在地的典型历史内涝点；场地及周边区域的排水设计符合所在区域的排水标准要求。   | 调查结果分析、专家会商 | 符合指标要求     | /         | 不符合指标要求 | <input type="checkbox"/> A <input type="checkbox"/> B <input type="checkbox"/> C | ——                          |
| 三、应急交通及资源可达性 |                      |                                                                                                                                                                                               |                                            |             |            |           |         |                                                                                  |                             |
| 13           | 出入口数量                | 具备2个及2个以上出入口，判定为“符合”；具备1个出入口，判定为“部分符合”。                                                                                                                                                       | 调查结果分析                                     | 符合指标要求      | 符合部分指标要求   | /         |         | <input type="checkbox"/> A <input type="checkbox"/> B <input type="checkbox"/> C | DB11/T 2142《应急避难场所 场址及配套设施》 |
| 14           | 资源可达性                | 周边环境情况：<br><input type="checkbox"/> 应急避难 <input type="checkbox"/> 医疗救治 <input type="checkbox"/> 消防灭火 <input type="checkbox"/> 派出所 <input type="checkbox"/> 物资储备 <input type="checkbox"/> 通信资源 | 调查结果分析                                     | 具备全部指标资源    | 具备3-5类指标资源 | 具备≤2类指标资源 |         | <input type="checkbox"/> A <input type="checkbox"/> B <input type="checkbox"/> C | ——                          |
| 四、有效避难容量     |                      |                                                                                                                                                                                               |                                            |             |            |           |         |                                                                                  |                             |
| 15           | 室内有效避难面积：<br>_____m² | 最小有效避难面积需≥100m²                                                                                                                                                                               | 室内有效避难面积=“场地总使用面                           | 符合指标        | /          | 不符合指标要求   |         | <input type="checkbox"/> A <input type="checkbox"/> B <input type="checkbox"/> C | ——                          |

|                                                                                                                                                                                                                                                                       |                      |                           |                                                                                                                                                                                                                                                                                                                                                                                                                                 |                                                             |                          |                          |             |                                                                                  |    |
|-----------------------------------------------------------------------------------------------------------------------------------------------------------------------------------------------------------------------------------------------------------------------|----------------------|---------------------------|---------------------------------------------------------------------------------------------------------------------------------------------------------------------------------------------------------------------------------------------------------------------------------------------------------------------------------------------------------------------------------------------------------------------------------|-------------------------------------------------------------|--------------------------|--------------------------|-------------|----------------------------------------------------------------------------------|----|
|                                                                                                                                                                                                                                                                       |                      |                           | 积”                                                                                                                                                                                                                                                                                                                                                                                                                              | 要求                                                          |                          |                          |             |                                                                                  |    |
| 16                                                                                                                                                                                                                                                                    | 室内可容纳避难人数：<br>_____人 |                           | /                                                                                                                                                                                                                                                                                                                                                                                                                               | 为室内有效避难面积的80%（其中，20%为物资储备、应急设备设施、停车场等占用面积）除以2，按照人均2.0平方米计算。 | /                        | /                        | /           | /                                                                                | —— |
| 17                                                                                                                                                                                                                                                                    | 其他技术指标               | 场地座位看台总数（不可拆卸）：<br>_____位 | /                                                                                                                                                                                                                                                                                                                                                                                                                               | /                                                           | /                        | /                        | /           | /                                                                                | —— |
| 五、设施配置情况                                                                                                                                                                                                                                                              |                      |                           |                                                                                                                                                                                                                                                                                                                                                                                                                                 |                                                             |                          |                          |             |                                                                                  |    |
| 18                                                                                                                                                                                                                                                                    | 设施配置情况               |                           | 现状具备设施配置情况：<br><b>基础类：</b> <input type="checkbox"/> 供水设施<br><input type="checkbox"/> 供电设施 <input type="checkbox"/> 通讯设施 <input type="checkbox"/> 应急照明设施 <input type="checkbox"/> 消防设施 <input type="checkbox"/> 室内通风设施 <input type="checkbox"/> 无障碍设施<br><b>综合类：</b> <input type="checkbox"/> 餐饮服务设施 <input type="checkbox"/> 物资储备 <input type="checkbox"/> 文化活动设施 <input type="checkbox"/> 医疗救治设施 <input type="checkbox"/> 停车设施 | 调查结果分析、专家会商                                                 | 基础类设施配置部具备且综合类设施配置具备3种以上 | 基础类设施配置部具备且综合类设施配置具备1-2种 | 基础类设施配置全部具备 | <input type="checkbox"/> A <input type="checkbox"/> B <input type="checkbox"/> C | —— |
| 评估结论                                                                                                                                                                                                                                                                  |                      |                           |                                                                                                                                                                                                                                                                                                                                                                                                                                 |                                                             |                          |                          |             |                                                                                  |    |
| <input type="checkbox"/> 宜优先转换为室内型应急避难场所,适宜应对 <input type="checkbox"/> 地震灾害 <input type="checkbox"/> 地质灾害 <input type="checkbox"/> 洪涝灾害 <input type="checkbox"/> 暴雨灾害 <input type="checkbox"/> 低温冷冻与雪灾 <input type="checkbox"/> 森林草原火灾 <input type="checkbox"/> 生产安全事 |                      |                           |                                                                                                                                                                                                                                                                                                                                                                                                                                 |                                                             |                          |                          |             |                                                                                  |    |



|                                                                                                                                                                                                                                                     |
|-----------------------------------------------------------------------------------------------------------------------------------------------------------------------------------------------------------------------------------------------------|
| <p>故 <input type="checkbox"/>生态环境事件类型突发事件发生后的人员避险或避难安置，_____m<sup>2</sup>有效避难面积，可容纳_____人避险和避难安置。</p> <p><input type="checkbox"/>宜作为室内型应急避难资源，需按照_____相关标准规范要求，对_____方面进行改造。</p> <p><input type="checkbox"/>不宜转换为室内型应急避难场所，主要因为:不符合_____场址选择要求。</p> |
|-----------------------------------------------------------------------------------------------------------------------------------------------------------------------------------------------------------------------------------------------------|

附 录 C  
(资料性)  
体育场馆平急转换设施设备表

体育场馆平急转换设施设备配置形式与转换要求见表C. 1

表 C. 1 体育场馆平急转换设施设备表

| 序号             | 应急避难场所所需设施设备 | 内容与要求                                              | 转换要求           |
|----------------|--------------|----------------------------------------------------|----------------|
| 一、一次性安装到位的设施设备 |              |                                                    |                |
| 1              | 应急供水         | 按人员避难区设置的供水管网、供水龙头、洗消龙头                            | 主要共用           |
| 2              | 应急水源         | 包括应急水源（水井）、净、滤水设施                                  | 独立设置           |
| 3              | 应急厕所         | 按照避难人员数量和男女比例确定的在室外构筑的简易厕所                         | 独立设置           |
| 4              | 应急排污         | 按照应急避难场所设计要求的污水管网、污水井、化粪池                          | 主要共用           |
| 5              | 应急广播         | 避难场所设施的广播线路和喇叭                                     | 宜独立设置、供应室应独立控制 |
| 6              | 应急供电         | 指避难场所增设的应急供电线裤、配电开关、照明设备，避难场所按平时加强设置。提供应急发电机组的配电设施 | 独立设置或与供应场馆发电机组 |
| 7              | 应急通风         |                                                    | 主要共用           |
| 8              | 指挥管理设施       | 指挥管理区需安装铺设到位的有线、无线、网络接口、交换柜、应急监控等                  | 独立设置、有条件共用     |
| 9              | 应急消防         | 按照灾时避难人数，结合平时增设                                    | 主要共用           |
| 10             | 应急标志         | 结合体育场馆标志牌位置设置                                      | 独立设置           |
| 二、临时构筑设施设备     |              |                                                    |                |
| 11             | 安全保卫         | 按照应急功能区设置                                          | 有条件共用          |
| 12             | 防疫隔离         | 按照应急功能区设置                                          | 独立设置           |
| 13             | 食品加工         | 增加食品加工设施                                           | 有条件共用          |
| 三、临时增添设施       |              |                                                    |                |
| 14             | 移动厕所         | 拖挂式、复合结构型、单体结构型等                                   | 独立设置           |
| 15             | 应急发电机组       | 柴油发电机组或应急移动柴油发电车                                   | 独立设置           |
| 16             | 应急生活用品       | 帐篷、防潮垫、洗脸盆等                                        | 独立设置           |
| 17             | 抢修抢建设备       | 锤子、扳手、救援绳等                                         | 有条件共用          |
| 四、灾时引入设施设备     |              |                                                    |                |
| 18             | 应急指挥设施设备     | 指灾时指挥通信必要的的全套指挥通信设施设备，包括流动指挥车                      | 灾时场所启用前保障到位    |
| 19             | 应急医疗设施设备     | 包括抢救伤病员的基础医药设备                                     | 灾时场所启用前保障到位    |
