# Supplementary material
Source: Research Square preprint supplement (doi:10.21203/rs.3.rs-9461961/v1)
Supplement: Supplementary file 2 [file 《平急两用公共基础设施转向规划与其他规划建设实施衔接路径研究》.pdf › Supplementary materias/《平急两用公共基础设施转向规划与其他规划建设实施衔接路径研究》.pdf]

住房和城乡建设部课题

# “平急两用”公共基础设施专项规划与 其他规划建设实施衔接路径研究 研究报告

课题名称：“平急两用”公共基础设施专项规划与其他规划建设  
实施路径研究

课题承担单位：中规院（北京）规划设计有限公司

课题起止时间：2025 年 4 月 25 日~2024 年 11 月 30 日

课题验收时间：2024 年 11 月 24 日

# 目录

|                                   |    |
|-----------------------------------|----|
| 1.概述.....                         | 1  |
| 1.1 研究背景.....                     | 1  |
| 1.2 研究意义.....                     | 3  |
| 1.3 研究对象和范围.....                  | 5  |
| 1.4 总体目标与重点任务.....                | 7  |
| 1.5 研究方法.....                     | 9  |
| 1.6 技术路线.....                     | 9  |
| 2.文献综述.....                       | 12 |
| 2.1 相关政策梳理及关于规划衔接解读.....          | 12 |
| 2.2 国内研究现状与评述.....                | 15 |
| 2.3 外相关经验.....                    | 25 |
| 2.4 “平急两用”专项规划案例解析.....           | 31 |
| 2.5 “平急两用”项目调研.....               | 35 |
| 2.6 现状问题.....                     | 37 |
| 3. “平急两用”公共基础设施专项规划概括及衔接理论框架..... | 38 |
| 3.1 “平急两用”公共基础设施.....             | 38 |
| 3.2 “平急两用”公共基础设施专项规划的定位.....      | 40 |
| 3.3 “平急两用”公共基础设施专项规划的内容.....      | 41 |

|                                       |     |
|---------------------------------------|-----|
| 3.4 理论框架.....                         | 49  |
| 4. “平急两用”公共基础设施专项规划与其他规划编制内容衔接.....   | 56  |
| 4.1 落实发展规划目标指标.....                   | 56  |
| 4.2 与总体规划衔接重构设施体系和完善空间布局.....         | 58  |
| 4.3 协同其他专项规划的内容.....                  | 72  |
| 4.4 指导详细规划编制控制性指标、布局、控制线等.....        | 81  |
| 4.5 编制内容衔接小结.....                     | 86  |
| 5. “平急两用”公共基础设施专项规划建设实施和评估反馈的衔接.....  | 87  |
| 5.1 建设实施衔接：从规划方案到项目落地.....            | 87  |
| 5.2 评估反馈重点：形成“编制-建设实施-评估”的流程衔接闭环..... | 93  |
| 6. 政策建议.....                          | 101 |
| 6.1 完善体制机制.....                       | 102 |
| 6.2 创新国土空间保障模式.....                   | 103 |
| 6.3 创新多元化资金与投融资体系.....                | 104 |
| 6.4 强化建设实施与运行治理联动.....                | 105 |
| 参考文献.....                             | 108 |
| 附表.....                               | 111 |

附件.....121

## 1. 概述

### 1.1 研究背景

#### 1.1.1 政策驱动：平急两用公共基础设施专项规划需要衔接现有规划体系

当前，国家高度重视“平急两用”公共基础设施体系建设，将其作为提升城市治理现代化水平和建设韧性城市的重要抓手。《国务院办公厅关于积极稳步推进超大特大城市“平急两用”公共基础设施建设的指导意见（国办发〔2023〕24号）》

（下简称《指导意见》）确定开展建设的“平急两用”公共服务设施，主要包括旅游居住设施、医疗应急服务点、城郊大仓基地、市政、旅游等配套设施等。这些设施在日常生活中承担着重要的社会和经济功能，而在紧急情况下，如公共卫生事件发生时，它们需迅速转换为应急隔离、救治和物资保障设施，以满足保障城市正常运转的需求。因此，确保这些设施能够在平时可持续运转、应急时高效运转是城市提前准备的重要内容。2023年，住房和城乡建设部印发的《“平急两用”公共基础设施建设专项规划编制技术指南（试行）》（以下简称《技术指南》），首次从国家层面对“平急两用”设施的功能定位、设施分类、编制内容、空间布局、转换机制等进行了系统阐释，提出通过“专项规划+设施布点+应急转换”三位一体的制度设计路径，推动“平时服务、急时应急”的功能融合。并且，此前在2022年国家发改委在《关于加强城市韧性建设的指导意见》中亦明确要求“推进‘平急两用’基础设施

和公共服务设施规划布局”，以提升城市系统整体的防灾减灾能力和应急响应效率。

上述政策文件不仅构建了“平急两用”设施建设与规划的顶层制度体系，也对专项规划如何与国土空间总体规划、市政基础设施、人防工程、医疗卫生、交通运输等相关规划实现高效衔接提出了明确要求，形成推动本课题研究的直接政策动因。

### **1.1.2 现实需求：提升城市应对复杂突发事件的能力**

在城市化快速发展的背景下，我国超大特大城市的综合风险暴露度显著提升。自然灾害、公共卫生突发事件、能源或水资源中断、城市内涝等风险频发，倒逼城市系统强化韧性支撑和转换能力。“平急两用”公共基础设施作为应急管理体系与公共服务体系的结合点，承载着在常态下提供市政、医疗、交通、物流等公共服务，在非常态时实现快速转换用于应急避难、物资储备、医疗救助等功能的双重使命。

### **1.1.3 规划衔接挑战：“多规融合”背景下的制度适配难题**

从当前实践看，各地虽已初步启动“平急两用”专项规划的编制，但仍普遍面临与现有市政、人防、交通、旅游、仓储、医疗等专项规划目标重叠、空间冲突、编制机制不统一等问题，导致规划难以有效整合，落地执行阻力较大。部分“平急两用”设施缺乏明晰的职责分工和投资机制，既无统一

标准，也缺制度保障，出现“规划有名无实、项目难以落地、设施功能虚化”等问题，影响城市基础设施系统的一体化建设与高效运维。

现实中，不少城市基础设施在设计与布局阶段未充分考虑“平急转换”需求，存在设施空间冗余不足、资源配置碎片化、应急响应链条不完整等短板，难以实现统一调配与高效响应。特别是在核心城区、人口密集区或功能复合区，基础设施一地多用、“平急两用”理念尚未系统嵌入法定规划体系，进一步凸显本课题的研究迫切性。尤其在国土空间规划深入推进的背景下，如何将“平急两用”设施有效嵌入法定国土空间规划体系(李燕，张垒，等,2025)，推动其与其他相关专项规划在功能目标、布局结构、指标约束、实施机制等方面的系统融合，成为当前城市治理和空间管理面临的重要命题。

因此，深入开展“平急两用”公共基础设施专项规划与其他规划建设实施的衔接路径研究，不仅是落实国家战略部署、推进城市高质量发展的关键任务，更是健全城市基础设施综合承载与应急转换能力、构建现代化城市安全韧性体系的核心路径。

## **1.2 研究意义**

本课题的研究具有重要的理论价值、现实指导意义与政策支撑作用，是推动“平急两用”公共基础设施建设与现有规划体系高效衔接、构建高水平城市韧性系统的重要路径。

### 1.2.1 理论层面

拓展“平急两用”基础设施规划研究，丰富多规融合的理论体系。当前，关于“平急两用”公共基础设施的研究仍处于起步阶段，尤其在其与国土空间规划及其他相关专项规划的系统融合方面，理论体系尚不健全、研究成果相对匮乏。本课题将在总结国内外基础设施应急与常态功能耦合理论的基础上，构建“平急融合”视角下的规划衔接分析框架，探索“功能协同—空间协同—机制协同”的多维路径，从而填补“平急两用”设施专项规划与其他规划间衔接研究的理论空白，推动城市规划理论在韧性治理和综合调配机制方面的深化。

### 1.2.2 实践层面

提供专项规划与相关规划有效衔接的路径范式，提升“平急两用”设施建设的可操作性。在实践层面，课题将针对当前“平急两用”设施规划面临的目标冲突、标准不一、实施脱节等突出问题，梳理典型城市在设施嵌入、编制流程、建设机制、转换实施等方面的实践经验，提炼可复制、可推广的规划衔接范式与策略建议，提升地方规划部门编制与实施专项规划的科学性、系统性与执行力。同时，通过构建跨部门、跨层级的协同机制模型，助力地方在多规融合背景下理顺职责体系、优化资源配置，提升“平急”功能的真正实现度和调度效率，推动公共基础设施安全韧性提升。



### 1.2.3 政策层面

为政策制定和创新提供思路和建议。当前国家层面虽已出台多项政策和技术文件，推动“平急两用”设施体系建设，但尚缺乏专项规划衔接路径的系统研究和可量化标准。课题研究成果将在“规划逻辑衔接—实施路径协同—管理机制适配”三方面提出操作性强的政策建议，为后续完善《“平急两用”公共基础设施建设专项规划编制技术指南》、制定相关国家或行业标准，以及地方推进配套法规政策体系建设提供理论基础与实证支撑。同时，也有助于推动构建统一协调、动态更新的“平急两用”基础设施治理机制，支撑国家在突发事件防控和韧性城市建设方面的制度创新与政策落地。

综上所述，本课题通过理论与实践探索并重，将为构建“平战结合、系统集成、空间协同、转换高效”的“平急两用”公共基础设施规划体系提供关键支撑，对于提升城市综合承载与应急转换能力，推进城市治理体系和治理能力现代化，具有重要战略意义与现实价值。

### 1.3 研究对象和范围

本课题聚焦市级“平急两用”公共基础设施专项规划，研究其在城市应急韧性体系中的定位、设施边界与规划衔接机制。

以《指导意见》中的设施类型为基础，并根据不同类型的突发事件需求，参考应急和公共服务设施体系，扩展为避

难安置设施、医疗应急服务点、城郊大型仓储基地、市政旅游配套基础设施、其他类型“平急两用”公共基础设施等 5 类设施。平时可服务民生、灾时可快速转换用于应急避难、医疗救治、物资集散等的公共基础设施，构成城市有效应对重大突发事件的韧性支撑体系。

本课题聚焦扩展的“平急两用”公共基础设施类型与空间适用范围，明确研究边界如下：

### （1）类型范围

研究对象主要包括以下四类具有“平急兼容”特征的基础设施：避难安置设施：分为以隔离为主的旅游居住设施，集中避难为主的集中避难安置场所；医疗应急服务点：如发热门诊、监测哨点、定点医院，灾时可快速扩容用于疫情处置；城郊大型仓储基地：承担应急物资集散与配送功能；市政、旅游配套设施：具备灵活改造能力，服务市民日常亦可应对突发需求；其他类型：包括社区服务点等。

上述设施是为应对突发公共卫生事件、自然灾害等重大事件而设的“平时—急时”可切换型基础设施体系。

### （2）空间范围

依据《技术指南》，本研究重点面向超大特大城市编制“平急两用”公共基础设施专项规划的适用需求，同时为其他城市提供可复制、可借鉴的规划路径和技术框架。

## 1.4 总体目标与重点任务

本课题为提升超大特大城市基础设施应对突发事件的“平急转换”统筹规划与实施能力，通过机制创新与路径优化，推动“平急两用”公共基础设施规划体系与城市治理体系深度融合，具体目标如下：

（1）构建“平急两用”专项规划与相关规划之间的系统衔接机制。明晰“平急两用”专项规划在城市规划体系中的定位，研究其与国土空间规划、公共服务、市政、应急等专项规划之间的目标协同、内容统筹和流程接口，实现规划内容互认与成果共享。

（2）建立“规-建-治”全过程中“平急两用”设施的实施衔接机制。贯通设施从规划预留、工程建设到运营管理的全过程环节，推动土地、资金、管理、演练等方面的协同联动，确保“平急”功能在关键时刻可切换、能响应、可落地。

研究重点为以下两个方面：

本课题围绕“平急两用”公共基础设施在规划、建设与治理过程中的协同衔接问题展开，旨在厘清相关规划体系内外部机制关系，构建具备可操作性的政策路径与衔接机制。研究将重点聚焦于“规划体系衔接不顺畅”、“‘规-建-治’闭环尚未建立”以及“多部门协同难度大”等关键现实问题，明确“平急两用”基础设施专项规划在国家规划体系中的地位与类型归属，并探索规划、建设、治理全过程高效衔接的

实现路径。

(1) “平急两用”专项规划在规划体系中的地位，以及与其他规划的衔接路径

当前“平急两用”基础设施专项规划在国家规划体系中的定位尚不明确，缺乏与发展规划、空间规划及其他各类专项规划之间的系统衔接路径。依据中央《关于建立国土空间规划体系并监督实施的若干意见》（即 44 号文），国家已构建以发展规划为统领、空间规划为基础、专项与区域规划为支撑的统一规划体系。然而，在该体系下，“平急两用”专项规划如何嵌入发展规划、与空间规划的总体规划和详细规划如何衔接，与现有防灾减灾、公共卫生、地下空间与旅游等领域专项规划进行分类协同，仍面临路径模糊与功能重复等问题，亟待从顶层设计层面明晰其在规划体系中的地位以及明确与前面所提及的三类规划之间的衔接路径。

(2) “平急两用”公共基础设施项目如何实现“规-建-治”的衔接，保障落地。

现阶段“平急两用”基础设施的“规-建-治”尚未形成完整的闭环体系。大量项目在规划设计阶段考虑应急功能，但在建设及后续管理环节中缺乏制度性支撑，导致转化路径难以落地。如何规划、建设、治理中一体化推进“平急两用”公共基础设施项目落地，在供地计划、资金安排、项目审批、运营管理等关键环节实现连续性设计与同步部署，成为破解

实施障碍的关键。本研究拟从主体和要素角度出发，关注土地供应、资金、转换管理及监督评估等方面，提出可行的“规建治”一体化衔接机制，以增强基础设施在日常运营与应急转换之间的灵活适配能力。

## **1.5 研究方法**

为系统推进“平急两用”公共基础设施专项规划与其他规划之间的衔接机制研究，课题将综合采用以下三种研究方法：

### **（1）文献综述与政策梳理**

系统整理国内外关于“平急两用”设施及其规划管理、衔接机制等方面的政策文件与研究成果，梳理其演进脉络、分类标准和典型路径，为后续分析提供理论基础与政策依据。

### **（2）案例比较分析**

选取国内外具有代表性的超大特大城市或典型区域作为案例对象，从空间规划、功能配置、实施机制等多个维度展开对比，归纳总结可借鉴的实践经验与适用路径。

### **（3）专家访谈与实地调研**

组织政府主管部门、规划设计单位、应急管理等领域的专家开展访谈，结合实地调研获取一手资料，补充数据盲点，验证规划衔接中的实际问题与应用难点。

## **1.6 技术路线**

技术路线总体上遵循“提出问题—分析问题—政策建议”

的逻辑主线，围绕“平急两用”公共基础设施专项规划与其他规划的衔接机制，构建以“编制—实施—反馈”不同流程的衔接重点进行研究，保证从规划编制到项目落地、再到运行管理的顺畅。

（1）在研究概述阶段，重点明确研究问题、对象与范围，梳理政策背景与规划实践中的主要矛盾，构建以“主体—内容—流程”为核心的三维分析框架，厘清“平急两用”专项规划在国家规划体系中的地位和功能边界，为后续衔接研究奠定理论基础。

（2）在“平急两用”公共基础设施专项规划与其他规划衔接研究方面，以“平急两用”专项规划为核心纽带，对发展规划、国土空间总体与详细规划以及其他专项规划（如旅游、仓储、医疗、应急避难等）在编制内容方面对接。主要涉及在目标指标、结构体系、控制边界等多方面的具体衔接。

（3）在建设实施和反馈方面衔接研究方面，研究重点转向“平急两用”专项规划从文本到项目的落地路径。在建设实施层面，核心是打通从规划到项目的落地路径，通过项目清单化、资金保障与审批优化确保设施建成落地；在运营反馈层面，关键在于建立“监测-评估-优化”的动态机制，通过量化评估设施的转换效率与运营效益，驱动规划与管理的持续迭代，最终形成一个从编制、实施到反馈的全流程韧性治理体系。

(4) 在政策建议上，从制度机制、内容技术和实施落地三个层面提出系统性对策。制度上，强化专项规划的法定地位和多部门协同工作机制；技术上，编制相关标准和明确规划重点内容；实施上，完善从规划到建设再到运维的全流程衔接体系，打通规划审批与应急管理的政策通道，建立常态化评估与激励机制。

整体而言，该技术路线以问题为导向、以框架为支撑、以路径为核心，推动“平急两用”专项规划与发展规划、国土空间规划及各类专项规划的协同衔接，并实现规划到项目的落地，提升“平急两用”公共基础设施专项规划的落地能力，为构建“平时服务、急时应急”的城市韧性空间治理新格局提供助力。

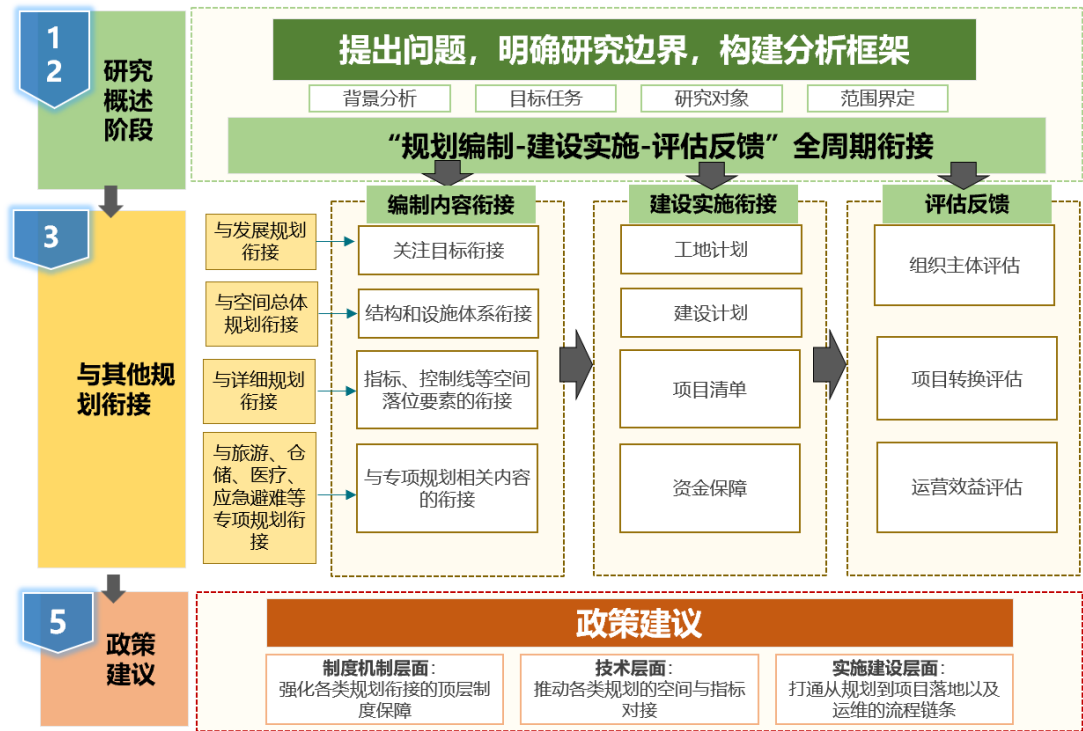

图 1-1 技术路线

## 2. 文献综述

### 2.1 相关政策梳理及关于规划衔接解读

各部门积极推进“1+N+X”配套政策体系搭建工作。目前，围绕贯彻落实《指导意见》，已出台配套政策文件共 21 项。

财政资金方面，财政部印发了《关于贯彻落实规划建设保障性住房等三项工作的意见》，对财政支持“平急两用”公共基础设施建设等工作提出明确要求。

建设用地方面，自然资源部印发了《关于统筹做好“平急两用”公共基础设施国土空间规划和用地保障工作的通知》，明确优先保障“平急两用”用地计划，完善用地支持政策。并在 2024 年自然资源部印发《平急功能复合的韧性城市规划与土地政策指引》提出的“转接场景”理念，需要在不同规划间建立标准化的对接界面。具体而言包括：与综合防灾规划协调，共享灾害风险评估结果，统筹应急空间布局；与公共卫生规划对接，协同布局应急医疗设施，统一建设标准；与旅游产业规划融合，在旅游设施设计中预留应急转换条件。

金融支持方面，经国务院同意，金融监管总局等 10 部门印发了《超大特大城市“平急两用”公共基础设施建设贷款管理办法》，明确支持国家开发银行等政策性银行向中国人民银行申请提供抵押补充贷款（PSL）等低成本资金。国家开



发银行印发了《关于支持积极稳步推进超大特大城市“平急两用”公共基础设施建设的指导意见（2023年版）》，中国农业发展银行印发了《中国农业发展银行超大特大城市“平急两用”公共基础设施建设贷款管理办法（试行）》，细化项目的金融支持政策。环境整治方面，国家发展改革委联合有关部门印发了《关于补齐公共卫生环境设施短板 开展城乡环境卫生清理整治的通知》，积极推广浙江“千万工程”经验，组织有关市县开展城乡环境卫生“大扫除”。

项目建设方面，国家发展改革委与住房城乡建设部联合印发了《关于加强超大特大城市“平急两用”公共基础设施项目清单管理的通知》，对项目审核原则、要求以及正面和负面清单作出规定。住房城乡建设部印发了《住房城乡建设部贯彻落实〈国务院办公厅关于积极稳步推进超大特大城市“平急两用”公共基础设施建设的指导意见〉的实施方案》、《住房城乡建设部办公厅关于加强“平急两用”公共基础设施质量安全监督管理的通知》，指导加强项目规划、建设、管理、转换，并对依法开工建设、加强质量安全管理和监管等提出要求。

配套条件方面，住房城乡建设部印发了《关于加强“平急两用”公共基础设施配套市政设施建设管理的意见》，明确配套市政设施建设管理重点任务；印发了《关于在“平急两用”公共基础设施建设中加强摸底调查用好存量房屋资源的

通知》，强调坚持存量优先、加强摸底调查。国家卫生健康委印发了《国家卫生健康委贯彻落实〈国务院办公厅关于积极稳步推进超大特大城市“平急两用”公共基础设施建设的指导意见〉的实施方案》，提出建立健全“平急两用”设施建设标准规范体系等要求。交通运输部印发了《交通运输部贯彻落实〈国务院办公厅关于积极稳步推进超大特大城市“平急两用”公共基础设施建设的指导意见〉的实施方案》，指导做好交通支持和保障工作。商务部印发了《超大特大城市商务领域“平急两用”公共基础设施建设实施方案》，支持物流配送等市政配套设施方面与“平急两用”主体设施统筹规划布局。生态环境部印发了《生态环境部贯彻落实〈国务院办公厅关于积极稳步推进超大特大城市“平急两用”公共基础设施建设的指导意见〉的实施方案》。技术指南方面，住房城乡建设部印发了《“平急两用”公共基础设施建设专项规划编制技术指南（试行）》。旅游居住设施方面，文化和旅游部印发了《文化和旅游部贯彻落实〈国务院办公厅关于积极稳步推进超大特大城市“平急两用”公共基础设施建设的指导意见〉的实施方案》，指导乡村旅游民宿、山区星级旅游饭店等布局建设。城郊大仓基地方面，国家发展改革委印发了《城郊大仓基地建设实施方案》，对城郊大仓基地建设给予专项支持。

以上政策对“平急两用”公共基础设施专项规划的衔接要求主要体现在三个层面：

与国土空间规划体系的衔接：专项规划必须在国土空间总体规划的框架下编制，落实总体规划确定的韧性城市目标、空间格局和设施布局要求。同时，通过详细规划将“平急两用”要求转化为具体地块的管控指标和空间安排，确保设施落地实施。

与其他专项规划的协调：加强与综合防灾规划、公共卫生应急规划、旅游发展规划等相关专项规划的对接，在设施布局、建设标准、管理要求等方面保持协调一致，避免冲突和重复建设。

实施保障机制的建立：通过项目清单管理、部门责任分工、资金保障等措施，将规划内容转化为具体行动。建立规划实施的监测评估机制，定期对设施建设、维护管理和功能转换情况进行评估，确保规划目标的实现。

这一政策体系的特点是以国土空间规划为基础，以多部门协作为支撑，以全周期管理为保障，构建了从规划编制到实施管理的完整制度框架，为“平急两用”设施建设提供了有力的政策支持。

## **2.2 国内研究现状与评述**

### **2.2.1 我国城市应急空间规划研究演进脉络**

我国城市应急空间规划研究的发展历程大体可分为三个阶段：综合防灾的标准化奠基阶段（2018 年前）、韧性与公共卫生引领的系统转向阶段（2019—2022 年）以及“平急

两用”与规划体系深度融合阶段（2023 年至今）。这一演进体现了从以工程防御为核心的静态抗灾模式，逐步转向以系统韧性与平急协同为导向的综合治理模式，是我国城市安全体系理念、技术与制度多维演化的集中体现。

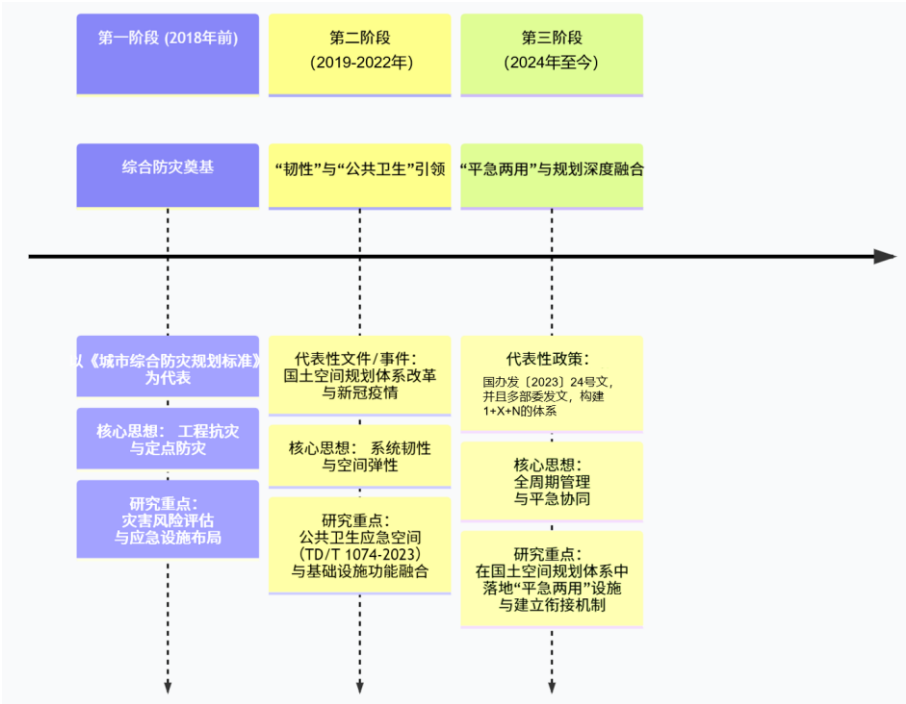

图 1-2 我国应急规划研究研究脉络

综合防灾的标准化奠基（2018 年前）。我国城市应急空间规划的起点主要基于综合防灾领域的制度建设与技术规范化探索。此阶段的核心标志是《城市综合防灾规划标准》（GB/T 51327-2018）的颁布与实施。该标准提出了“依据灾害风险评估配置应急资源”的基本原则，对应急指挥、救援、避难等设施的空间布局、分级体系与服务半径进行了系统性规定（中华人民共和国住房和城乡建设部，2018）。

这一时期的研究以“工程抗灾”和“定点防灾”为核心思想，

着重于通过空间分析与风险识别来优化防灾设施布局，构建静态化的安全防御体系。王后雄（2015）提出的“灾害类型—空间匹配”模型以及张小雷（2017）基于 GIS 的防灾空间适宜性分析，为后续韧性研究奠定了方法基础。总体上，该阶段实现了应急空间从概念认知到标准体系的初步构建，标志着我国城市防灾规划从经验性防御迈入了标准化、规范化阶段。

韧性与公共卫生引领的系统转向（2019—2022 年）。第二阶段的转折点在于 2019 年国土空间规划体系改革与新冠疫情的爆发，这两大事件共同推动了城市应急空间研究从单一防灾向系统韧性和公共卫生方向的拓展。国家层面发布的《城乡公共卫生应急空间规划规范（试行）》（TD/T 1074-2023）明确了公共卫生事件应对空间的类型、转换原则与布局要求（中华人民共和国自然资源部，2023），标志着应急空间正式纳入法定规划体系。

学界在此背景下强化了“系统韧性”与“空间弹性”的理论框架。如何青菁（2022）通过武汉案例研究指出，在公共服务设施规划阶段预留“空间与功能接口”能够显著提升城市对突发公共卫生事件的响应能力；陆玉麒（2021）强调应急空间应与国土空间规划体系协同推进，构建从战略布局到专项实施的多层级体系；吴志强（2020）则提出基于城市信息模型（CIM）的应急空间动态监测与评估机制。该阶段实现了研究对象的显著扩展，从传统自然灾害防御转向多类型突发事

件响应，从静态设施布局转向动态系统管理，为“平急两用”理念的孕育提供了直接的技术与制度基础。

“平急两用”与规划体系深度融合（2023 年至今）。进入 2023 年后，“平急两用”成为国家层面城市安全体系建设的重要方向。2023 年 7 月，国务院办公厅印发《关于积极稳步推进超大特大城市“平急两用”公共基础设施建设的指导意见》，明确要求在民宿、旅游酒店、医疗机构等设施中嵌入应急功能。自然资源部发布的《平急功能复合的韧性城市规划与土地政策指引》（2024）首次在政策文件中提出“平急功能复合”概念，要求在国土空间规划体系中统筹考虑公共设施、基础设施的“平战转换”功能，实现“规划嵌入—制度衔接—管理协同”的一体化推进。

该阶段的核心思想是“全周期管理与平急协同”。研究重点从单体设施的功能复合，转向规划体系、治理机制和管理流程的系统嵌入。郭璐宇与翟国方（2024）提出的“时间转换—空间复用”模型为“平急两用”设施提供了微观层面的理论框架，强调以情景模拟、功能映射实现基础设施的时空弹性；王凯（2022）与陈静等（2023）则以北京、上海为例，探索在公园绿地、体育场馆等公共空间中嵌入应急避难与医疗救援功能的实践路径。

这一阶段标志着我国应急空间研究从“系统韧性”走向“平急协同”，从设施技术走向规划制度。未来的发展趋势是

以国土空间规划体系为载体，通过标准规范、平台化管理与多主体协同，实现“平时可用、急时能转、灾后可复”的空间治理新格局。

### 2.2.2 “多规合一”与规划衔接机制研究

国土空间规划体系改革是强调“一张蓝图干到底”，是新时代我国空间治理体系和治理能力现代化的重要制度创新。它以统一底图、统一标准、统一规划、统一平台为基础，实现了规划编制、实施、监管的全过程协同。对于“平急两用”公共基础设施而言，这一体系不仅提供了制度入口，更重塑了其城市发展、资源保护及风险防控之间的空间关系与治理逻辑（刘彦随，2020；陆玉麒，2021）。通过在“多规合一”格局下嵌入“平急转换”机制，城市空间实现了从技术整合到治理变革的跨越。

国土空间规划体系的最大制度创新在于其空间信息的“一体化管理”与资源约束的“刚性化表达”。自然资源部建设的国土空间规划“一张图”实施监督信息系统，是实现“多规协同”的核心技术支撑平台（中华人民共和国自然资源部，2022）。该系统以统一的坐标基准、地类分类与空间编码体系为基础，整合各类规划数据，实现了国土空间要素的分层叠加、冲突检测与动态更新，从根本上解决了过去部门分割、图层割裂的问题（王金南等，2021）。

在此框架下，“一张图”不仅是规划数据的展示平台，更

是跨部门协同决策的技术底座。系统通过与审批、监测、评估等业务模块的衔接，实现了从规划编制、实施到监督的闭环管理。例如，生态保护红线、永久基本农田和城镇开发边界等“三区三线”作为空间管控的刚性约束条件，被直接嵌入系统数据库，实现了与新增建设项目和专项规划的实时比对（周乾，2023）。这种技术架构为“平急两用”设施的空间布局提供了制度化的冲突检测与兼容性审查路径，使其能够在遵守生态安全底线和空间刚性约束的前提下，实现功能复合与动态转换。

2024年出台的《平急功能复合的韧性城市规划与土地政策指引》进一步强化了这一机制。文件明确要求将“平急两用”设施纳入“一张图”信息系统，实施全周期动态监管与空间预警，推动“平急功能”从专项建设行为转向法定规划层面的可持续治理（中华人民共和国自然资源部，2024）。这一要求的提出，意味着“平急两用”设施的选址、布局、审批和后期转换均需在同一空间信息体系下运行，实现了从规划编制到实施监督的法定化、数字化管理。

在研究层面，李志刚等（2023）指出，“一张图”系统的本质是国家空间治理数字基础设施，它通过构建统一的数据语言与标准规范，重塑了空间要素之间的逻辑关系，为包括“平急两用”设施在内的多类型基础设施提供了整合性治理平台。沈体雁（2022）则从制度层面论证了“三区三线”作为国



土空间刚性边界的调控功能，认为其核心价值在于实现发展与安全、生态与韧性之间的动态平衡。由此可见，国土空间规划技术体系的演进，不仅提供了“平急两用”设施嵌入的技术基础，也为其规划合法性与空间协调性提供了刚性支撑。

### 2.2.3 “规-建-治”全生命周期衔接研究

“规—建—治”一体化是近年来我国空间治理体系创新的核心议题，旨在打破规划、建设、管理之间的阶段割裂，实现从空间管控到实施治理的全链条衔接（张尚武，2022）。在“平急两用”公共基础设施的研究与实践中，这一理念为设施从规划设计到建设实施、再到运营管理的“平急转换”提供了系统性支撑。国内研究逐渐从传统的规划实施评估拓展到全过程管理与复合治理的维度，形成了较为系统的理论与方法体系。

一是“规—建—治”一体化的提出与理论逻辑。“规—建—治”一体化源于国土空间治理改革背景下的规划执行问题反思。长期以来，我国城市规划存在“重编轻管、重批轻评、重规划轻实施”的结构性矛盾（吴志强，2020）。随着国土空间规划体系确立与“多规合一”实践推进，规划部门与建设、管理部门之间的关系开始被重新定义。“规—建—治”理念强调以规划为统领，建设为载体，治理为目标，构建从规划编制、工程建设到空间治理的全生命周期闭环（李志刚与胡滨，2023）。

理论上，“规—建—治”的衔接具有三层逻辑：

**制度逻辑：**通过统一的规划体系与法律框架，实现规划与建设、运营间的权责联动与成果传导；

**技术逻辑：**依托数字化平台（如“国土空间规划一张图”和 CIM 系统）实现数据互通、规则对齐与动态监督；

**治理逻辑：**以多主体协同为核心，推动政府部门、企事业单位与公众在城市运营中的共治共享。

“平急两用”衔接启示在于，“规划-建设-治理”之间的衔接不仅是流程整合，更是功能耦合。通过规划阶段预留空间与接口、建设阶段落实可转换设施、治理阶段实施运行监测和绩效评估，可实现“平时可用、急时可转、灾后可复”的全周期管理体系。

二是规划阶段的衔接研究。规划阶段的衔接研究主要聚焦于“规划编制—实施管理”之间的落地问题。研究认为，规划成果要真正进入建设环节，需具备项目生成机制、指标传导机制和制度嵌入机制（陆玉麒，2021；刘彦随，2020）。

在“平急两用”情境下，学者主张通过规划前置性与空间统筹性实现“规”的主动嵌入。陈露（2021）以广州为例提出，应在总体规划阶段明确公共服务设施的“平急转换潜力区”，并在专项规划与控规阶段落实具体布局与设计参数。吴志强（2020）提出利用 CIM 模型进行场景化推演，在规划阶段预

判应急转换对交通、通信、能源系统的影响，实现动态可行性校核。

近年来，自然资源部与多地规划部门提出的“规划条件书制”与“图则动态维护机制”也为“规”的落地提供了制度保障。通过在规划条件书中明示“平急转换功能要求”，实现从指标到项目、从图纸到建设的无缝衔接。这种制度安排使“平急两用”设施不再是专项规划的附属内容，而成为法定规划约束中的组成部分。

对于“平急两用”建设实施的启示在于“平急两用”规划阶段的核心在于法定性+接口化。**法定性**确保“平急两用”专项规划成果能够纳入国土空间规划体系并依法执行，成为建设和管理环节的刚性约束；而**接口化**则通过建立统一的数据标准、技术接口与管理规则，实现规划成果与建设实施、运行治理之间的顺畅衔接，使规划意图能够在工程建设和运营管理中得到有效落地。

三是建设阶段的衔接研究。建设阶段的衔接研究强调“规划实施”的工程落地与标准化转换。研究普遍认为，传统建设过程存在“规划设计脱节、部门审批分割、建设管理断层”等问题，难以形成闭环（王凯，2022；郝兵，2022）。为此，学者提出“建设环节的规划再嵌入”理念，即在项目立项、设计审查、施工监管等阶段嵌入规划要求，实现“规划意图—设计落实—施工校核”三位一体的过程控制。

在应急与平急两用领域，建设阶段的重点在于可转换性设计实践。例如，《上海市综合防灾减灾安全韧性分区建设导则》（2023）要求所有公共建筑在设计阶段预留独立排风、应急电源及可分区疏散通道，具备应急转化条件；《广东省“平急两用”公共基础设施建设设计指引（试行）》（2024）则提出“平时功能最优、急时功能可靠”的双目标设计原则，通过界面控制、模块化结构与多功能接口实现空间转换。

此外，学界探索了多种工程化路径：

模块化与装配化技术：提升公共建筑和基础设施快速改造能力（陈静等，2023）；

城市信息模型嵌入（BIM+GIS+CIM）：实现设计—施工—运维全过程数据贯通（吴志强，2020）；

数字监管平台：对建设进度、质量和转换接口实施实时监控（郝兵，2022）。

对“平急两用”而言，建设阶段的衔接关键在于把规划转化为可实施工程条件，并通过数字化手段形成全过程可追溯体系，从而确保设计理念在工程层面落地。

四是治理阶段的衔接研究。“治”的环节标志着从规划建设向运行治理的过渡。国内研究将治理阶段的衔接视为“城市运行—风险响应—绩效评估”的闭环（沈体雁，2022；李志刚与胡滨，2023）。

学界提出三种主要治理模式：

数字孪生驱动的动态治理：基于 CIM 平台构建城市运行“一张图”，实现应急设施状态监测、容量调度与情景推演（吴志强，2020）；

多主体协同治理：建立政府主导、企业参与、公众共治的设施管理网络，实现日常服务与应急响应的联动（张尚武，2022）；

绩效导向的评估反馈机制：通过国土空间体检评估制度，将“平急转换效率、应急可达性、恢复时效”等指标纳入评估体系，形成规划调整与项目更新的动态触发机制（自然资源部，2023）。

在地方实践中，深圳、成都等地已在数字城管系统中嵌入“平急设施状态监测模块”，实现物联网感知数据与规划数据库的实时联通，形成了“规划—建设—运维”一体化的治理雏形。学者普遍认为，治理阶段的关键是从“静态管理”走向“韧性治理”，通过数据驱动和绩效考核实现持续优化。

对“平急两用”公共基础设施而言，治理阶段衔接的关键在于运行监测与反馈闭环。规划和建设成果只有在治理端被动态调用与反馈，才能实现真正意义上的“全生命周期协同”。

## 2.3 外相关经验

在全球应对灾害风险和城市安全挑战日益严峻的背景

下，发达国家普遍将“平急两用”理念纳入国家韧性基础设施体系，通过制度设计、规划引导与工程实践相结合，推动城市公共设施实现多功能、可转换的综合利用。这些经验对我国“平急两用”公共基础设施专项规划的构建具有重要参考价值。

国际上，空间规划体系普遍经历了从部门分割到综合统筹、从工程抗灾到系统韧性的演变。发达国家在长期防灾减灾与应急治理实践中，形成了较为成熟的“规划—建设—治理”全周期衔接机制。其核心特征是：通过多层级目标传导机制实现纵向政策一致；通过空间叠图与一致性审查制度实现横向规划对齐；通过韧性导向的设计与评估标准推动规划成果工程化落实。

英国、美国、荷兰和日本在不同制度背景下探索出了各具特色的衔接路径，对我国“平急两用”设施的规划体系建设具有重要启示。

### **2.3.1 英国：目标分层与政策传导机制**

英国的空间规划体系以政策导向和目标指标传导为核心特征，形成了从国家到地方的多层级协调机制（田颖、耿慧志，2019）。该机制确保国家战略目标能够被层层细化并落实至具体项目，实现规划体系的法定衔接与落地转化。

英国空间规划体系由《国家规划政策框架》（NPPF, 2021）统领，强调“通过政策制定与目标细化，将上位规划意图传导

至下位规划与项目实施”。其层级结构包括：

国家层面：确定总体目标与指导原则，如“繁荣经济、保障居住、保护自然与文化环境”；

区域层面：重在战略协同与空间协调，不提供具体用地方案（除大伦敦外）；

地方层面：注重实施性与项目引导，明确开发边界、用途控制与空间品质要求。

这一结构使规划目标具备“由上而下”的传导路径和“由下而上”的反馈机制，形成动态协同的空间治理体系。

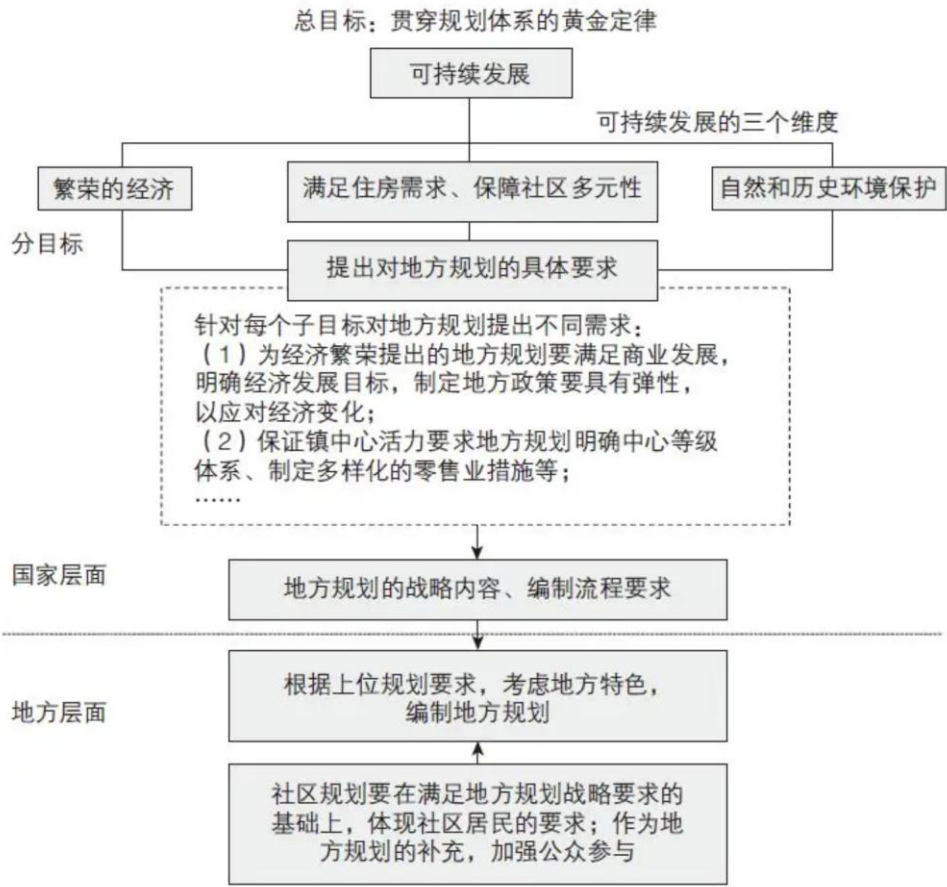

图 2-1 英国各级空间规划衔接示意

资料来源：田颖,耿慧志. 英国空间规划体系各层级衔接问题探讨——以大伦敦地区规划实践为例 [J]. 国际城市规划, 2019, 34 (02): 86-93.

就大伦敦为例,说明其目标分层与实施衔接。伦敦《The London Plan》(2021)以国家 NPPF 为指导,提出“建设一个可持续、包容和具备韧性的城市”三大核心目标。该规划通过目标分层与空间传导机制实现以下路径:

城市层面:设立韧性、气候适应与应急网络等量化指标;

区级层面:由各区编制《Local Development Framework》,细化公共绿地、避难空间与应急通道布局;

项目层面:如“泰晤士河应急走廊计划”(Thames Resilience Corridor),通过多功能堤岸、公园与地下通道的复合利用,实现“平时休闲—急时防灾”的空间复用。

英国经验说明,规划衔接的实质是“目标的法定化与分层细化”。建立自上而下的目标链与评估机制,可保证“平急两用”设施在不同规划层级间保持一致性与可执行性。

### 2.3.2 美国:一致性审查与空间叠图评估

美国与荷兰更侧重通过规划一致性审查(Plan Consistency Review)与空间叠图技术(Spatial Overlay Analysis)实现多规划间的横向衔接。二者在韧性规划与应急体系建设方面具有代表性。

美国的 PIRS 一致性评估机制。美国联邦紧急事务管理署



（FEMA）提出的“PIRS”（Plan Integration for Resilience Scorecard）方法，是空间规划一致性评估的典型工具（FEMA, 2021）。该方法通过建立量化评分卡体系，检验综合规划与各专项规划（交通、住房、公共设施、应急等）之间在空间上的一致性与风险协调性。其流程包括：

利用 GIS 叠层分析，将各类规划的目标、用地与设施数据叠加；

检验应急规划与发展规划在空间布局上是否协调；

对发现的冲突或遗漏进行“空间一致性评分”与改进反馈。

该制度已被纳入《国家减灾规划指南》（National Mitigation Framework, 2020），成为联邦政府评估地方规划绩效的核心工具。

以迈阿密的 PIRS 实施为例。迈阿密作为气候风险极高的沿海城市，采用 PIRS 框架将防洪规划、住房规划与土地利用规划进行空间比对。评估发现部分沿海低洼区存在开发过密与避险设施缺失问题，随后通过修订土地利用控制图，将这些区域转化为“应急转换空间”（Emergency Adaptation Zone）。这一机制实现了政策与空间的双向校核，使规划从文本协调转向空间一致。

### 2.3.3 荷兰：国家空间一致性审查制度

荷兰在《国家空间与环境战略》（NOVI, 2020）中建立了

“空间一致性检查”（Spatial Consistency Check）制度。地方政府在编制规划时，需通过国家空间信息平台与上位战略比对，确保政策目标、用地分区和风险防控的一致性，特别在防洪安全、生态连通与应急通道布局方面实现空间嵌合。

鹿特丹的“蓝-绿基础设施网络”为例。鹿特丹市通过“Room for the River”和“Rotterdam Climate Proof”项目，将防洪堤、雨水调蓄池、公园绿带等要素叠合为多功能系统，实现了城市日常生态空间与应急滞洪空间的复合使用。项目全过程由国家到市级规划部门联合评估，实现了“规划一致性—建设集成—应急可用”的空间闭环。

美国和荷兰经验表明，规划衔接的关键不在于形式一致，而在于空间数据与政策逻辑的可验证一致性。通过 GIS 叠加分析、指标比对与评分反馈，可形成跨部门、跨层级的“规划一致性检查制度”，确保“平急两用”设施在国土空间体系中的协同合法性。

### 2.3.4 日本：防灾规划与城市规划的法定融合

日本是最早在国家层面系统化推动“平战结合”基础设施建设的国家之一。《国土强化基本法》（2013）提出基础设施必须兼具“多功能性”与“双重使用性”，强调在平时服务市民生活的设施，在灾时应可转为避难所、物资集散地、应急医疗点等关键节点<sup>1</sup>。例如，部分学校、公园及停车场在设计时即

---

<sup>1</sup> “多功能性”“双重使用性”是日本法律术语，意指一项设施在满足日常使用的同时，在灾时具备应急转

预留供水、供电、通信等接口，以便灾害发生后可迅速转换用途，构建具有韧性的城市空间格局。

2.3.5 国际经验总结

综上，国外经验表明，“平急两用”理念的有效落地离不开国家层面制度引导、城市规划体系嵌入、多部门协同支持及技术规范的预置安排。这为我国制定“平急两用”公共基础设施专项规划提供了系统性参考。

表 2-1 国际经验对我国“平急两用”的启示

| 经验维度   | 国外代表机制       | 主要做法                | 对我国的启示                               |
|--------|--------------|---------------------|--------------------------------------|
| 纵向衔接机制 | 英国“目标分层传导”   | 国家—区域—地方多级目标细化、法定约束 | 建立“国家标准—专项规划—项目实施”三级指标链，形成平急目标传导体系   |
| 横向衔接机制 | 美国/荷兰“一致性审查” | 以 GIS 叠图检验规划间空间协调性  | 建立基于“一张图”的规划叠加与一致性校核制度               |
| 实施工程机制 | 日本“复合空间设计”   | 公共设施“平时—急时”可转换设计    | 将平急功能写入设计导则和建设许可制度，实现工程化落地           |
| 治理反馈机制 | 欧盟“韧性主流化评估”  | 将韧性指标纳入规划绩效评估体系     | 在国土空间体检中引入“平急转换效率”与“恢复时效”指标，形成动态反馈闭环 |

2.4 “平急两用”专项规划案例解析

从北京、成都、西安等地的“平急两用”公共基础设施专项规划实践来看，规划体系的衔接已逐步形成由总体规划统领、专项规划细化、技术标准支撑、实施方案落地的多层联动机制，体现出从规划编制到建设实施的闭环衔接逻辑。

化能力。

### 2.4.1 北京：构建“总规—专项—技术—实施”的全链条衔接体系

北京市在“平急两用”领域率先实现了由顶层战略规划—专项行动方案—技术标准规范—区县项目衔接组成的完整体系。《北京市韧性城市空间专项规划（2022—2035年）》将“平急两用”纳入韧性城市顶层设计，通过“空间分层、设施复合、政策工具、数字支撑”的系统布局，形成对国土空间总体规划的战略呼应。《实施方案》进一步提出“1+3+5”空间布局结构（先行区、重建区、安置区），实现专项规划目标与市级建设任务、用地安排、资金投入的衔接。《公共服务设施嵌入‘平急两用’功能设计指南》则将专项规划目标细化为设计层面的可操作要求，为控规和项目设计提供技术依据。门头沟区灾后重建专项规划将上位战略目标转化为工程建设清单，完成了从“规划文本”到“项目落地”的转译。北京的经验表明，其规划衔接机制主要体现在“三个统一”：

①统一空间体系——专项规划嵌入总体规划空间框架，形成法定化嵌合；

②统一指标传导——多规共享指标库，确保分级目标一致；

③统一成果落地——规划条件、用地审批与项目建设一体衔接，实现“从图纸到工程”的闭环。

### 2.4.2 成都：以数据和标准为支撑的统筹衔接机制

成都市的“平急两用”专项规划以量化分析和标准体系为核心，通过多源数据支撑、部门协同统筹、技术标准导引实现规划间的高效衔接。专项规划在现状分析阶段整合了用地、交通、市政和互联网大数据，建立多维度的需求评估体系，增强了规划编制与城市总体规划、应急体系规划的衔接精准性。通过“功能—空间—设施—资源”四大统筹策略，实现了规划与建设实施的动态协调。《成都市“平急两用”公共基础设施建设技术指南（2024 版）》以及三类建设导则（医疗应急点、城郊大仓、旅游居住设施）共同形成“1+3”技术标准体系，明确了平急转换的设计、结构、机电与运行要求，使专项规划成果能够直接进入项目设计与审查环节。这种以数据驱动、标准贯通的模式，构建了“规划目标—指标体系—工程标准”的衔接通道，确保从空间布局到工程实施的连续性。

### 2.4.3 西安：以制度嵌入和分级布局实现规划与项目衔接

西安市在“平急两用”专项规划中，重点强化与《西安市国土空间总体规划（2021—2035 年）》的衔接，实现了政策导向、空间布局和实施分级的系统统一。其做法是：一方面，在总体规划层面确立“平急两用”公共基础设施的功能定位和用地管理要求，纳入“一张图”管理体系；另一方面，在专项规划层面，将旅游居住、医疗应急、城郊大仓、政旅配套等五

大类设施体系纳入城市公共服务系统，形成市区（县）—乡镇（街道）—社区（村）三级布局。同时建立冗余与需求测算机制，对设施容量、服务半径和承灾能力进行动态评估，实现项目储备清单与规划编制的实时对接。这种“分级衔接+动态更新”的模式，保证了专项规划成果在控规与项目建设阶段的可操作性与可调整性。

#### 2.4.4 启示

综上，北京注重顶层统筹与制度闭环，成都突出数据驱动与标准引导，西安强调层级划分与动态更新，三者共同展示了“平急两用”专项规划与其他规划、建设实施衔接的三种有效路径：

一是嵌入式法定衔接——在总体规划中明确定义“平急两用”功能区与指标要求，实现空间与政策层面的制度嵌合；

二是标准化技术衔接——通过技术导则与设计指南，把专项规划要求细化为工程标准和设计参数；

三是数字化动态衔接——以“一张图”信息平台为载体，建立规划目标、项目实施、运行评估的实时反馈机制。

这为全国范围内推动“平急两用”专项规划与国土空间总体规划、专项规划以及建设实施之间的有机衔接提供了系统化范式。

## 2.5 “平急两用”项目调研

为系统掌握我国“平急两用”公共基础设施在不同类型城市中的建设实践与运行模式，课题组选取了上海、杭州、桐庐三地作为调研对象，围绕医疗设施、物流仓储、旅游居住等多个领域，开展了涵盖7个代表性项目的实地调研。其中，上海市重点考察了上海交通大学医学院附属瑞金医院（北院）、复旦大学附属儿科医院以及西郊国际仓储项目，主要关注其在应急医疗保障与城郊大仓的功能和转化机制；杭州市则围绕东郊仓配一体化中心项目展开调研，关注其在城市物流和物资集散方面的平急转换；桐庐县调研内容涵盖梅蓉村乡村旅游综合体、杭新景高速桐庐服务区、杭州市第一人民医院桐庐院区项目以及桐庐农副产品批发市场，涉及交通节点、区域医疗与农产品保供等多元场景。

调研结果显示，一是当前“平急两用”基础设施建设普遍呈现以具体项目为载体、快速推进的特征，各地在建设中积极引入新型运作模式和多功能融合理念。以杭州东郊仓配一体化中心与桐庐农副产品批发市场项目为例，相关设施在空间布局、功能配置及运营机制方面均体现出较强的应急转化潜力，为实现“平战结合”提供了物质基础与制度空间。同时，调研也发现，“平急两用”项目的实施需多部门密切协同配合，涵盖发展改革、卫生健康、自然资源、住房建设、纪检监察等多个职能单位，在项目规划、建设审批及运行管理过程中

形成合力，这对于构建高效有序的平急统筹机制提出了更高要求。

二是，从运行机制来看，大部分项目在平时以市场主导运营模式为主，但其在应急状态下的功能转化路径尚不统一，案例之间存在明显差异。以桐庐农副产品批发市场为例，其应急保供转化方案较为明确，具备较强的执行基础；而杭州东郊仓配一体化中心项目功能上具备转化潜力，但尚未形成系统化的应急预案与演练机制，说明部分项目在转化深度和操作层面仍有待进一步提升。

三是调研表明，“平急两用”基础设施项目在实际推进过程中高度依赖多部门之间的协同配合。由于此类项目通常涉及跨行业、跨领域的功能集成，其在政策制定、审批流程、建设实施及监督管理等各环节均需多方参与、统筹协调。例如，杭州东郊仓配一体化中心项目从政策发布到实质性开工仅历时一年，充分体现了多部门协同机制在推动“平急两用”项目中的重要作用。该项目在推进过程中，得到了发展改革、自然资源、住房建设、卫生健康以及纪检监察等部门的多维支持，涵盖了从前期立项、规划审批、建设条件保障，到后期运行监管等全链条流程。这种多部门协同推进机制不仅提高了项目建设效率，也为构建高效响应的“平急”功能转换体系提供了制度保障和实践样本。

总体而言，本轮调研反映出“平急两用”基础设施建设在



城市不同层级和功能类型中已初具探索基础，但在机制集成、转化路径与实际操作层面仍存在不确定性，有待通过标准化引导、制度优化与实践反馈不断深化与完善。

## 2.6 现状问题

“平急两用”公共基础设施专项规划是一类新兴的规划类型，近年来受到越来越多关注，部分城市也已开展了初步探索实践。然而，目前这类规划在与现有各类规划的衔接和实际操作中仍面临不少问题，缺乏系统性的理论研究和实践机制。具体表现在以下几个方面：

一是规划体系衔接不顺畅。“平急两用”专项规划尚未纳入现有法定规划体系，不同类型规划（如国土空间总体规划、城市更新、市政基础设施、应急管理）在设施分类、空间表达、服务范围、应急等级等方面各用各的标准，缺少统一的“平急转换”评估指标和空间匹配方法，导致“平急两用”设施在不同规划中难以形成一致表达和复用。规划与用地管理、专项建设之间缺乏有效衔接。

二是平急两用公共基础设施的“规-建-治”尚未建立全流程的闭环。目前“平急两用”专项规划多以试点形式推动，尚未纳入法定审批流程，编制与实施缺乏制度保障。同时，规划之间缺乏数据共享和编制协同，导致平时为应急预留的资源在实际灾时难以高效启用。虽然部分城市在公共建筑、公园绿地、市政管廊等领域尝试了“平急”功能预留或改造，

但整体仍缺乏统一规划部署，土地保障、财政支持、责任分工和运营管理等关键环节未系统落实，规划难以真正落地实施。

**三是“平急两用”公共基础设施跨多部门，协调较困难。**“平急两用”设施具有跨部门、跨周期、跨场景的特点，涉及住建、应急、发改、自然资源等多个部门，目前缺少明确的责任分工和协调机制，容易出现职责重叠、功能冲突或管理空白的情況。

因此，亟需围绕“平急两用”专项规划与现有规划体系的有效衔接，重点推进以下研究突破：

建立统一的“平急转换”设施分类和表达体系，支撑多规协同和平台集成；明确专项规划与法定规划之间的流程接口和协同机制；

构建覆盖“平急两用”设施全生命周期的实施管理机制，涵盖土地、资金、标准和责任体系等关键要素。探索“平急两用”专项规划与应急管理体系融合的空间表达方式，推动规划成果从“纸面文件”向“应急工具”转化，切实提升实际应用价值。

### **3. “平急两用”公共基础设施专项规划概括及衔接理论框架**

#### **3.1 “平急两用”公共基础设施**

根据《指导意见》，“平急两用”公共基础设施是一个有

明确目标、类型和功能边界的概念，是一套可有效响应、抵御和消化吸收重大疫情和突发公共事件等冲击的韧性体系，平时具备旅游、康养、休闲等服务功能设施，应急情况可转为应急隔离、临时安置、物资保障、医疗救治等功能。

从城市安全视角看，“平急两用”公共基础设施是建设安全韧性城市所需城市应急基础设施的一个重要组成部分，是面向新发重大疫情和突发公共事件所储备的体系化设施、制度和人员能力。

按照功能，“平急两用”设施将平时使用和应急使用有机结合，打造一个既具备日常运营功能，又具备应急响应能力的基础设施系统。在遇到新发重大疫情或突发公共事件的第一时间，将受影响的人群转移到“平急两用”公共基础设施体系中开展隔离、救治，并提供相应物资保障，形成“第一道防火墙”，以保障城市整体正常运转。

具体分为旅游居住设施、医疗应急服务点、城郊大型仓储基地三类主体设施，及市政、旅游配套基础设施。“平急两用”公共基础设施要求坚守健康安全底线和应对不确定性，综合了韧性城市、健康城市、卫生城市等城市建设理念，在旅游、酒店、仓储、医疗等领域植入相应的应急处置能力，实现城市健康安全治理关口前移、从被动应对到主动防御转变的基本策略。

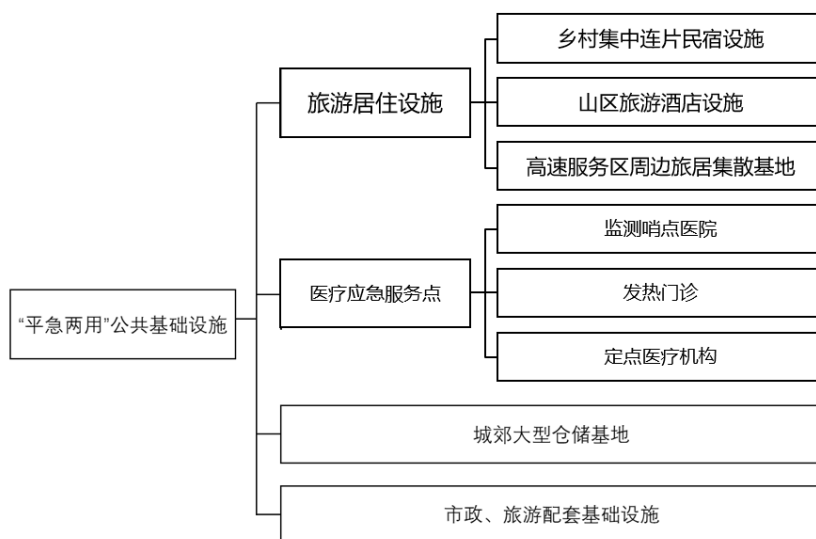

图 3-1 《指导意见》关于“平急两用”公共基础设施的分类

### 3.2 “平急两用”公共基础设施专项规划的定位

“平急两用”公共基础设施专项规划，是指在一定时期内，针对城市“平急两用”公共基础设施的应用场景、设施体系、规划目标、配置标准、设施布局及转换利用等内容所进行的综合性统筹安排与实施管理。《国务院办公厅关于积极稳步推进超大特大城市“平急两用”公共基础设施建设的指导意见》（国办发〔2023〕24号）首次明确提出，应在城市规划建设中统筹兼顾平时服务与急时应急功能，形成安全、宜居、韧性的城市空间体系。

随后，《“平急两用”公共基础设施建设专项规划编制技术指南（试行）》对专项规划的核心任务进行了系统界定，强调该规划应在国土空间总体规划的框架下，统筹不同类型设施的布局与转换关系，实现城市设施“平时可用、急时可转”

的空间治理目标。由此可见，“平急两用”专项规划既是城市基础设施体系规划的深化拓展，也是落实城市韧性发展战略的重要支撑。

可以看到“平急两用”公共基础设施专项规划与城市发展规划、国土空间总体规划和详细规划、其他专项规划（尤其设计其设施体系相关的规划）具有衔接关系，需要关注。

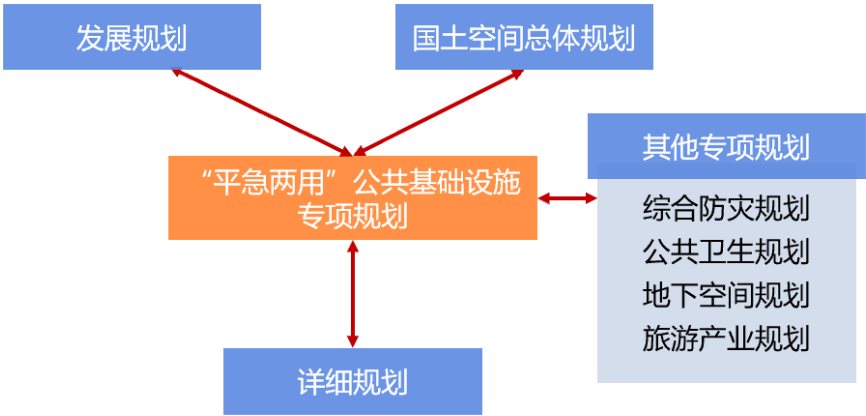

图 3-1 “平急两用”公共基础规划专项规划及其相关规划构成

### 3.3 “平急两用”公共基础设施专项规划的内容

#### 3.3.1 《“平急两用”公共基础设施建设专项规划编制技术指南（试行）》规定的编制内容

住房和城乡建设部办公厅特制定《“平急两用”公共基础设施建设专项规划编制技术指南（试行）》。该指南为专项规划的编制提供了全面的技术框架与实施路径，其核心编制内容可概括为以下方面：

首先，规划确立了明确的顶层设计原则与目标。规划期

限锚定 2027 年，并设 2025 年为近期节点，要求遵循“统筹规划、集约发展”、“平急结合、着眼长远”及“因地制宜，稳步有序”三大基本原则。其根本目标是构建一个既能满足日常公共服务需求，又能在应急状态下快速、高效转换为隔离安置、医疗救治与物资保障核心节点的设施网络，并设定了隔离房源储备、医疗救治能力等关键量化指标，为规划实施提供了清晰的考核依据。

其次，规划编制建立在科学的“双评估”基础之上。一是开展“设施需求评估”，通过综合分析“急时”应急场景下的规模需求与“平时”旅游、医疗、物流等正常运营需求，进行精准匹配与规模测算，旨在避免资源浪费。二是进行“选址安全评估”，要求规避各类灾害高风险区与城市防灾薄弱环节，从源头保障设施自身的安全性与可靠性。

再次，规划构建了以四大类型为核心的“平急两用”公共基础设施体系。该体系主要包括：具备快速腾挪转换能力的**旅游居住设施**（如乡村民宿、山区酒店）；承担监测、筛查与集中救治任务的**医疗应急服务点**（如哨点医院、发热门诊）；服务城市物资中转分拨、急时转为应急物流枢纽的**城郊大型仓储基地**；以及确保系统运行的**配套基础设施**（如韧性道路、应急通信、污水与医疗废物专项处理设施）。对于各类设施，指南均从规划布局、功能配置及建设标准层面，详细阐述了其“平急”功能融合与快速转换的具体要求。

最后，规划强调实施过程中的全生命周期管控与多维度保障。指南创新性地提出以“设施分布一张图”和“启用次序一张表”为核心工具，对设施实行从规划、建设、运维到转换、优化的闭环管理。在保障机制上，要求明确编制主体与责任分工，强化土地、资金等政策支持，建立公众参与机制，并依托城市体检进行动态监测与评估，确保专项规划能够有效传导至项目落地，并根据实践反馈持续优化，最终形成一个真正高效、韧性的城市安全防护体系。

### **3.3.2 团标“平急两用公共基础设施专项规划编制指南”规定的编制内容**

**一是设施需求分析。**依托国土调查、地籍调查、不动产登记、资源资产清查等法定数据成果，梳理社区服务设施、公共管理与公共服务设施、商业服务业设施、绿地与开敞空间等符合转换条件的存量空间、潜在资源，明确平急功能复合的设施载体，因地制宜构建“平急两用”公共基础设施体系。并且以平疫结合的应用场景为基础，结合城市韧性评估结果，研究确认各类“平急两用”公共基础设施的“平时”功能、适宜的“急时”应用场景与功能、服务能级与启用条件。

**二是设施规模测算。**分级分类测算“急时”需求。综合考虑城市人口规模、城市韧性评估结果，参考相关防灾设施建设标准，面向各类“平急两用”应用场景，对“急时”集

中安置与隔离、物资储存与保供、公共卫生应急等需求进行分析。衔接相关规划“平时”需求。充分衔接旅游、仓储物流、医疗、市政等相关专项规划文件，结合城市体检相关结论，分析确认“平急两用”旅游居住设施、医疗应急服务点、城郊大仓基地等设施的“平时”需求规模。根据平急不同要求测算各类设施的需求。

**三是规划目标与空间布局。**(1) 目标指标制定。结合城市韧性评估，研究提出城市平急功能复合的总体要求，从提升灾害风险预防应对能力出发，合理确定“平急两用”公共基础设施建设、管理的规划目标和要求。统筹综合防灾、公共卫生、地下空间、旅居设施、物流体系、市政设施体系等专项规划的目标与指标，结合地方发展阶段和特征，从功能类型、空间结构、建设规模、转换标准等方面，确定“平急两用”公共基础设施建设、管理等方面的量化指标。设施选址指引，根据不同设施选址要求，提出选址原则。(2) 规划空间布局。结合城乡生活圈规划构建城市健康安全单元和安全基础设施网络，明确适应不同灾种、城乡一体、分级响应的“平急两用”公共基础设施的空间布局方案，构建规模适宜、选址安全、平急功能兼备、空间相对独立的“平急两用”功能组团。(3) 并细化总体要求，形成各类设施的总体要求，规划布局要求、功能配套要求。

**四是实施保障与“平急转换”指引。**包括(1)近期实施



规划，提出近期建设目标、指标、安排、分工等。以及（2）平急转换指引。涉及转换要求，启用次序等内容。

### 3.3.3 专项规划核心内容总结

“平急两用”专项规划的基本结构包括六个核心要素：应用场景、设施体系、需求分析、规划目标、配置标准与设施布局、转换部署及实施管理。

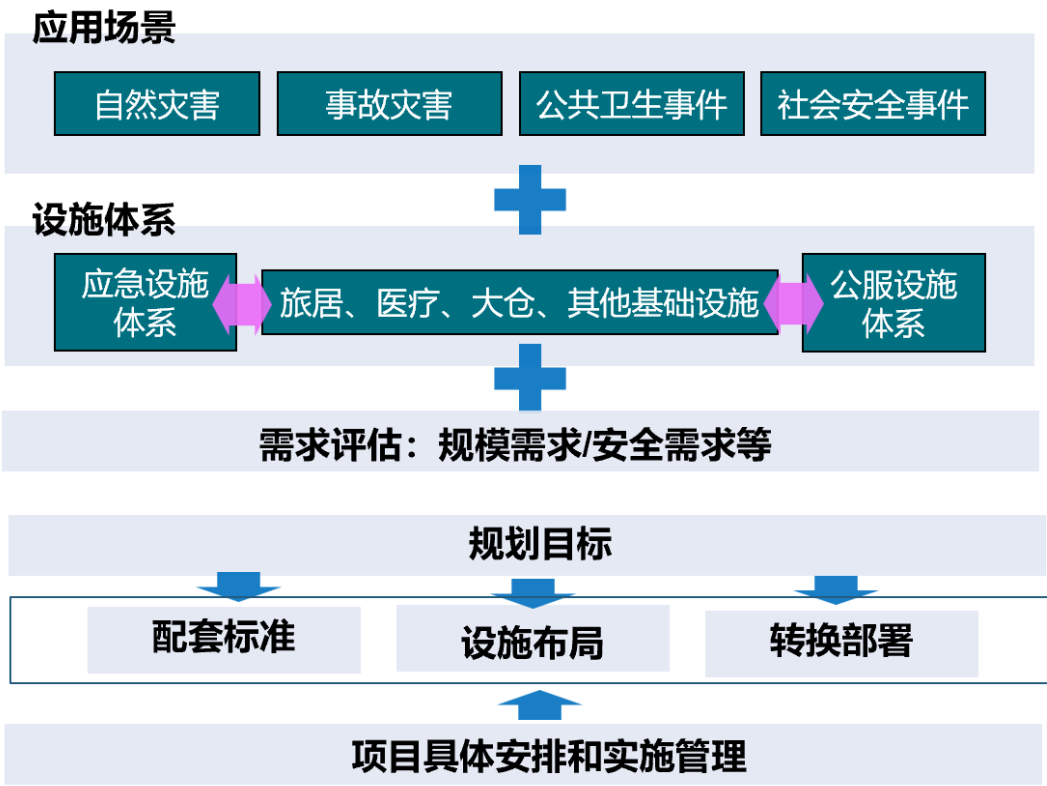

图 3-2 “平急两用”公共基础设施专项规划内容示意

#### a 应用场景

专项规划需基于城市综合风险评估，全面识别可能触发“平急两用”机制的应急情景。主要涵盖自然灾害、事故灾害、公共卫生事件和社会安全事件四大类。

不同类型的风险场景决定了设施类型与空间布局的差异，例如：洪涝灾害需要重点考虑高地避难与排水设施；公共卫生事件则需强化医疗资源的应急调配与隔离空间布局。应用场景的科学识别，是后续设施体系构建与转换机制设计的基础。

## **b 设施体系**

“平急两用”设施体系由应急设施体系与公共服务设施体系两部分构成。

应急设施体系包括医疗救治、物资储备、应急避难、指挥调度等功能设施；公共服务设施体系涵盖旅游居住、文体场馆、教育建筑、商业综合体等具备应急转换潜力的设施类型。

两者通过功能复合、空间预留与转换设计形成互补关系，实现“平时服务社会、急时应对灾害”的双重目标。例如，大型体育馆、会展中心可在灾时改造为临时避难中心；城郊物流园区可临时转为应急物资转运枢纽。

## **c 需求评估**

开展“平急两用”公共基础设施需求评估，需构建涵盖规模、安全与支撑的三方面进行评估：**(1) 设施需求评估**。通过“平急匹配”综合测算设施规模，即基于灾害情景模拟“急时”隔离、医疗与物资的峰值需求，并衔接相关规划分析“平时”

旅游、仓储与医疗的常态需求，以预留留白或功能转换实现集约平衡；**(2) 选址安全评估**，依据自然灾害风险普查成果避开灾害高风险区与敏感区域，确保设施自身安全；**(3) 市政配套需求**，分析交通、水务、能源等生命线系统的承载能力缺口与韧性提升要求，为设施高效运行提供全面支撑。

#### **d 规划目标**

专项规划的总体目标是构建安全韧性、功能复合、运行高效的城市基础设施体系。结合城市韧性评估，研究提出城市平急功能复合的总体要求，从提升灾害风险预防应对能力出发，合理确定“平急两用”公共基础设施建设、管理的规划目标和要求。其中超大特大城市至 2027 年具备隔离功能的房源不少于 2 万间和 1 万间，疫情监测哨点医院覆盖辖区所有区二级以上医院具备快速扩容发热门诊条件，承担主要救治任务的三级重症监护病区床位比例不低于 10%，各地可结合城市实际情况提出适宜指标。

并根据目标要求提出相应的指标体系，参考团标要求（见附表 1），可以根据城市自身特色要求完善指标体系。

#### **e 配置标准与设施布局**

规划需明确不同类型“平急两用”设施的建设标准、服务半径、覆盖人口及空间分布密度。

应结合城市功能分区、人口密度和交通可达性等因素，

科学配置设施布局。

在城市中心区，应重点布局具备高集约性和高转换效率的设施；在郊区及乡村地区，应强化物资储备、应急避难等支撑性功能。此外，应结合“15分钟生活圈”与“城市健康安全单元”等理念，形成分级配置、分区保障的设施体系结构。

## **f 转换部署**

“平急转换”是“平急两用”专项规划的核心环节。规划需明确平时与急时的功能切换路径，包括启动程序、责任体系、技术接口及时限要求。

在设施建设阶段，应预留必要的接口条件（如供能、排水、通信与交通通道）；在管理阶段，应建立常态化维护、应急演练与动态评估机制，确保设施在“急时”能够快速响应。

同时，专项规划应形成项目清单与行动计划，将规划目标具体化、工程化，实现“规—建—治”全过程管理。

从总体逻辑上看，“平急两用”公共基础设施专项规划呈现出“风险识别—设施统筹—目标落实—项目落地”的系统结构。其上层是以风险识别为导向的应用场景体系，中层是以空间统筹为核心的设施与布局体系，下层则是以项目化实施为抓手的执行与管理体系。通过三层体系联动，规划实现了从战略统筹到实施落地的全链条设计，为应对突发事件提

供制度化保障。

专项规划的根本功能在于实现“平时服务—急时应急”的动态平衡。它不仅通过规划引导形成空间布局的合理性，更通过机制设计确保转换过程的可操作性。

### **3.4 理论框架**

#### **3.4.1 理论来源和逻辑基础**

“平急两用”公共基础设施的规划与建设，具有跨部门、跨层级、跨阶段的典型特征。其核心难点在于如何在规划体系中实现从战略目标到工程实施、再到运维治理的连续衔接。本研究以治理体系的系统论为总体框架，结合规划整合理论、协同治理理论与全生命周期管理理论，构建了“主体—内容—流程”三维衔接框架，以系统性地解决“谁来衔接、衔接什么、如何衔接”的关键问题。

##### **（1）系统论：提供整体性分析的逻辑基础**

系统论（Bertalanffy, 1968）强调，任何复杂系统都由要素、结构与过程构成，通过分析它们之间的关系，可以理解系统如何实现整体功能。

在“平急两用”规划的情境中，系统论帮助我们复杂的衔接问题分解为三个维度：

主体维（Structure）：确定规划、建设、治理等不同层级和部门的参与关系与责任分工；

内容维 (Function): 界定衔接的核心要素, 包括空间布局、指标体系、政策工具和技术标准;

流程维 (Process): 明确衔接的运行路径与动态反馈机制, 实现规划、建设、运维的循环传导。

系统论为本研究提供了整体分析的逻辑框架, 使“平急两用”体系的多主体协作与多环节衔接具备结构化的解释基础。

## (2) 规划整合理论: 强调目标一致与空间兼容

规划整合理论 (Berke & Godschalk, 2009) 认为, 城市韧性建设的关键在于不同规划之间的目标一致性与空间兼容性。

在多规合一背景下, 该理论为“平急两用”规划的衔接提供了方法依据:

一方面, 通过统一的空间底图和数据标准, 实现国土空间总体规划、专项规划及各类应急规划的“共图叠加与冲突检验”; 另一方面, 通过指标体系的上下贯通, 实现总体目标—专项布局—项目实施之间的量化传导。

因此, 该理论主要支撑本研究框架中的内容维, 强调以空间和指标为纽带, 实现规划内容在不同层级间的衔接与协同。

## (3) 协同治理理论: 关注多主体合作与制度嵌合

协同治理理论 (Ansell & Gash, 2008) 强调在复杂公共事

务中建立政府、社会与市场主体的合作决策与联合执行机制，以提升治理效能。

“平急两用”设施的实施涉及自然资源、住建、应急、卫健、交通等多个部门，其成功依赖于跨部门的信息共享、职能协同与联合管理。

因此，该理论主要支撑主体维的建构，强调通过制度化的责任链条（如联合审查、跨部门专班、任务清单制）和数字化支撑平台，形成“政府统筹—部门协同—社会参与”的多元共治格局。

#### （4）全生命周期管理理论：实现规划到运维的闭环

全生命周期管理理论（Pressman & Wildavsky, 1973）指出，政策的有效实施依赖于将目标嵌入项目储备、审批、建设、运维等全过程，实现“从图纸到地面”的连续闭环。

在“平急两用”体系中，这一理论帮助建立了从规划编制到运行评估的动态传导机制：

在规划阶段，将可转换空间、应急接口、转换条件等要求写入规划文本与审批条件；

在建设阶段，将专项规划要求细化为工程技术标准和设计导则；

在运维阶段，利用数字孪生平台进行状态监测和应急演练，并基于评估结果滚动修编规划。

因此，该理论支撑了流程维的设计，使“平急两用”规划具备持续优化与反馈能力。

### 3.4.2 “主体-内容-流程”理论框架

为解决“平急两用”公共基础设施专项规划与其他规划、建设实施之间的多部门、多阶段衔接问题，本研究构建了以“主体-内容-流程”为核心的三维衔接框架。该框架以系统论为总体逻辑，强调通过主体协同、内容对齐与流程贯通，形成“规划协同—实施贯通”的双重衔接体系，确保“平急两用”体系的连续性与可执行性。

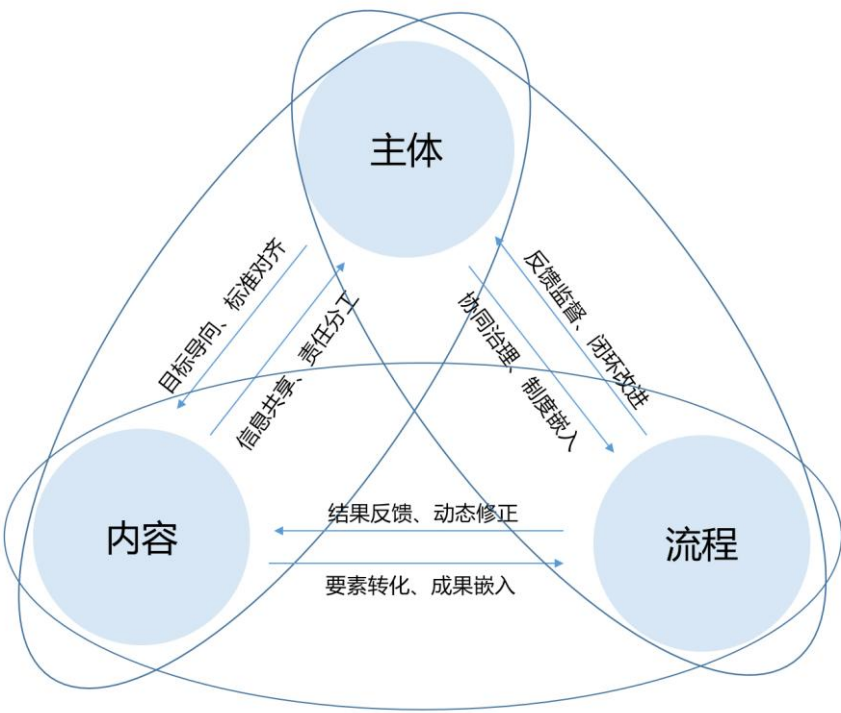

图 3-3 三维理论框架示意

（1）主体维：多元协同与分层分工

主体维关注规划、建设、管理等不同层级和部门之间的



协同关系。在“平急两用”体系中，主体既包括政府各职能部门（如自然资源、住建、应急、卫健、交通等），也包括社会资本、科研机构 and 社区组织。

通过建立信息共享、联合审查、协同决策等机制，实现从“单部门管理”向“跨部门共治”的转变。

主体维的核心目标是形成清晰的责任链与沟通链：即“谁参与、谁负责、如何协同”，为规划衔接提供组织基础。

## （2）内容维：目标导向与要素对齐

内容维关注不同规划与建设环节中涉及的目标指标、空间、标准、政策、项目等核心要素的协调一致。

在多规合一背景下，不同规划往往存在指标冲突和空间重叠问题，因此需建立目标共识、标准对齐、要素转化的内容衔接机制。

“平急两用”专项规划通过对上位规划（发展规划、国土空间总体规划等）的目标承接，对下位建设项目（如防灾设施、应急仓储、医疗服务点）的要素嵌入，实现从战略目标到工程落地的连续传导。

## （3）流程维：全周期管理与动态反馈

流程维强调规划与建设、运维之间的过程衔接。

“平急两用”体系的运行过程包括规划编制、审查审批、

建设实施、运行维护和绩效评估等环节，各阶段需形成信息反馈和动态调整机制。

通过在规划阶段预设接口、在建设阶段落实标准、在运维阶段监测评估，实现“前端嵌入—中端落实—后端反馈”的闭环运行。

数字孪生和智慧管理平台在其中发挥关键作用，能够对设施状态进行实时监测，对应急转换、空间适配、物资储备等进行动态优化。

流程维的核心在于反向修正与滚动更新，确保规划体系在城市运行变化与风险冲击中保持弹性。

#### （4）三维互动与双重衔接机制

三维框架并非孤立运行，而是通过互动耦合形成“规划协同—实施贯通”的双重衔接机制：

主体-内容互动：通过信息共享和任务分工，推动不同主体在共同目标下协同行动；

内容-流程互动：通过指标转化和结果反馈，使规划内容在实施过程中不断修正与完善；

流程-主体互动：通过制度嵌入与演练反馈，促进多主体在动态过程中形成共治机制。

这种多维互动使“平急两用”规划体系具备了跨部门协同、跨层级联动、跨阶段闭环的特征，从而实现从规划方案到工

程实践、再到应急治理的全过程衔接。

### **3.4.3 理论框架应用**

“平急两用”公共基础设施建设涉及多个部门、多层次规划和多个实施阶段，其规划衔接与落地实施长期面临两类突出问题：一是规划体系内部“多规分立”，不同部门、不同类型规划之间目标不一致、边界不衔接；二是规划成果与项目建设、运维管理之间存在“断链”，难以形成从规划到实施的连续传导机制。为此，本研究构建了以“主体—内容—流程”为核心的三维衔接框架，用以系统解决规划体系的横向协同与纵向贯通问题，确保“平急两用”设施从规划到建设、从建设到管理的全链条衔接顺畅。

不过针对在“平急两用”公共基础设施专项规划编制、建设实施、运营反馈不同环节衔接重点不同，本研究从实际效果出发，聚焦三个环节的主要矛盾进行分析，解决衔接问题：

- （1）规划编制衔接——强调重点内容衔接**
- （2）建设实施衔接——强调主体，流程的衔接**
- （3）评估反馈衔接——强调流程衔接**

## 4. “平急两用”公共基础设施专项规划与其他规划编制内容衔接

### 4.1 落实发展规划目标指标

城市发展规划作为城市发展的战略总纲，确立了未来五年的总体方向、核心目标与重大任务，是各类专项规划的顶层依据。“平急两用”公共基础设施专项规划的核心使命，即是主动承接发展规划的战略意图，将其中关于“安全”与“韧性”的纲领性要求，系统性地转化为可落地、可考核的空间蓝图、项目清单与技术标准，为城市的高质量发展与高水平安全提供坚实的物质空间保障。二者的衔接具体体现在以下四个层面：

#### （1）落实发展规划的战略导向：从“安全理念”到“韧性指标”

发展规划从顶层设计层面强调“统筹发展与安全”、“树立安全发展理念、增强城市安全韧性”。“平急两用”专项规划则将这些宏观战略目标具体化、指标化。例如，通过设定“到2027年，储备具备隔离功能的房源不少于X万间”、“城郊大型仓储基地应急物资储备能力达到Y万吨”等量化指标，将“韧性城市”的抽象概念，落实为一系列清晰可考核的建设任务，确保安全发展的底线拥有明确的衡量基准。

#### （2）价值理念衔接：从“人民中心”到“设施保障”

发展规划秉持“以人民为中心”的发展思想，提出涉及居

民生福祉目标。“平急两用”专项规划通过予以响应。例如一方面，通过布局“监测哨点医院-发热门诊-定点医疗机构”三级医疗应急服务网络，将公共卫生防护网实体化；另一方面，通过在城区、乡村及重点区域均衡布局各类“平急两用”设施，确保在应急状态下能为全域人口提供及时、公平的安全庇护与生活保障，将发展成果惠及全体市民。

### **（3）空间格局衔接：从“宏观布局”到“精准落位”**

发展规划通常会提出“构建‘多中心、网络化’的城镇空间结构”、“推动城乡融合”等空间战略。“平急两用”专项规划则通过布局协同与集约节约原则，将应急设施体系精准嵌入城市空间骨架。具体而言，专项规划的设施布局将与发展规划确定的城市副中心、重点新城及城乡接合部等功能区域紧密结合，划定“平急两用功能区”，形成与城市空间结构相匹配的分级响应网络。同时，坚决贯彻集约节约要求，优先利用存量建筑和低效用地进行改造升级，严格控制新增建设用地规模，实现安全效益与空间效益的统一。

总结而言，“十五五”发展规划指导“平急两用”公共基础设施专项规划的目标指标和空间格局。发展规划是提出安全愿景的“战略总纲”，回答“建设一个什么样安全城市”的问题；而“平急两用”专项规划则是实现安全愿景的“行动方案”，回答“如何通过具体设施建设来保障安全”的问题。专项规划的编制过程，本质上是一个持续回溯和落实发展规划战略要求的

过程，确保每一处“平急两用”设施都成为支撑城市长远发展战略的坚实基础。

## **4.2 与总体规划衔接重构设施体系和完善空间布局**

### **4.2.1 “平急两用”公共基础设施体系重构**

在城市现代化治理背景下，“平急两用”设施体系的构建，既要满足常态下的服务需求，又要在突发事件中快速转换为应急功能，实现“平时可用、急时能转、战时顶用”。为此，体系需要对接总体规划中对应急设施体系和公共服务设施体系得到要求，在应用场景拓展、设施类型、应急体系衔接方面完善。

#### **(1) 拓展“急时”场景**

在“平急两用”公共基础设施政策谋划之初，将公共卫生事件（尤其是疫情防控）作为主要应用场景，随着 2024 年《关于进一步提升基层应急管理能力的意见》、《关于推进新型城市基础设施建设打造韧性城市的意见》、2025 年《中共中央、国务院关于推动城市高质量发展的意见》发布，政策要求增强城市综合防灾减灾救灾能力。构建城市安全风险谱系，优化城市防灾减灾空间格局，统筹利用地上地下空间，加强“平急两用”公共基础设施建设，构建总量充足、布局合理的应急避难场所体系。

未来“平急两用”公共基础设施应急场景可拓展至五大类：一是洪涝、地震、台风等自然灾害；二是危化品事故、

交通事故、火灾等事故灾难；三是传染病暴发等公共卫生事件；四是群体性事件和重大安保任务等社会安全事件；五是展会、赛事、旅游旺季等重大公共活动。通过场景拓展，确保设施体系能够形成“全灾种、多场景”的响应能力。

随着应对场景的扩展，应考虑已有相关设施的利用，通过调研和场景分析，其相关性较强的为应急设施体系和公共服务设施体系，“平急两用”公共服务设施体系的构建考虑基于两者进行扩展和衔接。

**(2) 重构设施体系**

**a.城市应急设施体系**

总体规划中会强调应急设施布局与风险空间分布，例如应急通道等。根据总规以及应急规划中的要求，总结应急设施分类如下表。

**表 4-1 “平急两用”相关城市应急设施分类表**

| 设施类型    | 典型设施                             | 对应应急模块            |
|---------|----------------------------------|-------------------|
| 应急交通通道  | 航运码头、机场、高铁站、<br>高速出入口            | 物资投<br>送、<br>人员疏散 |
| 避难安置设施  | 中小学校园、体育馆、公园绿<br>地、<br>星级酒店、会议中心 | 避险安置              |
| 应急医疗设施  | 哨点医院、发热门诊、方舱预<br>留地              | 医疗救治              |
| 物资储备与配送 | 城郊物流仓库、商超配送中心                    | 物资保障              |
| 应急指挥设施  | 政务服务中心、会展中心、<br>大型酒店会场           | 指挥调度              |
| 应急救援中心  | 消防特勤站、武警驻地、<br>社会救援力量            | 救援力量              |
| 生命线保障设施 | 水厂、变电站、燃气调压站、                    | 运行保障              |

|          |                 |      |
|----------|-----------------|------|
| 交通枢纽     |                 |      |
| 应急通信保障设施 | 通信基站、卫星地面站、数据中心 | 通信保障 |

## b 公共服务设施体系

总体规划中规定分级的公共服务设施体系，按照服务层级可划分为三级体系结构。市级设施承担服务全市的功能，具有规模大、功能综合的特点，如市图书馆、市体育中心和市级综合医院；区级设施服务于特定片区或行政区域，功能多样且数量适中，包括区级文化馆、区级医院等；社区级设施则紧密贴近居民日常生活，布局密集且便捷可达，如社区服务中心、社区卫生站和文化活动室。这种“市—区—社区”三级结构形成了分层供给、均衡覆盖的公共服务体系，有效满足了不同层级、不同区域的差异化服务需求。

公共服务设施体系的分为五大类：

**(1) 公共文化设施体系**以图书馆、文化馆、博物馆、展览馆、群众文化中心和演艺剧场等为核心组成，正经历从“文化供给型”向“生活体验型”的转变，逐步形成“文化走廊—城市书房—文化驿站”的网络化布局。规划重点在于强化公共文化空间的开放性与复合利用，推动文化活动中心与社区服务中心等设施共建共享。

**(2) 教育设施体系**涵盖幼儿园、小学、初中、高中、职业学校和特殊教育学校等多种类型，依据人口规模和适龄人口分布进行分级配置。规划中特别强调步行可达性与均衡布局，推广校区联合体模式，实现体育场地、图书馆等教育资



源的开放共享。

**(3) 公共体育设施体系**包括市区级体育中心、体育馆、体育公园和社区运动场地等，强调全民健身、普惠共享，并与城市绿地系统有机融合。规划重点在于推动"15 分钟健身圈"建设，形成从大型赛事场馆到社区健身场所的多层次网络布局。

**(4) 医疗卫生设施体系**由综合医院、专科医院、基层卫生服务中心、村卫生室和疾控中心等组成，正从以医疗机构为中心向"公共卫生+医疗+康养"综合体系转型。规划中注重强化医联体建设与区域医疗协同，积极推进分级诊疗制度实施。

**(5) 社会福利设施体系**以老年人服务设施、儿童福利机构和残疾人康复中心为核心，构建了以社区为基础、居家为依托、机构为支撑的服务网络。规划重点在于发展嵌入式小微养老设施、托育点和残障无障碍空间，提升弱势群体照护水平。

### **(3) “平急两用”公共基础设施体系构建**

依据《指导意见》、住房和城乡建设部《“平急两用”公共基础设施建设专项规划编制技术指南》、自然资源部《城乡公共卫生应急空间规划规范》等相关文件标准，并参考总体规划中对应急设施和公共服务设施的要求，可以总结为 5 大类，13 中类设施，每个城市可根据自己的设施体系进行微调。

其中，避难安置设施包括旅游居住设施、集中避难设施

2 中类；医疗应急服务点包括疾控中心、监测哨点医院、发热门诊、定点医疗机构 4 中类；城郊大型仓储基地包括末端分拨站、城际接驳站、区域级枢纽 3 中类；市政、旅游配套基础设施包括应急道路交通设施、应急公用设施 2 中类；其他类型“平急两用”设施包括社区服务点、信息中心等其他类型设施。

一个合理的“平急两用”设施体系，本质上是一个“城市功能冗余备份系统”。它不需要全部新建，而是以战略眼光，将城市中现有的大量设施进行“功能赋能”和“协议锁定”，确保它们在危机时刻能被迅速激活，形成一个有机的整体，从而极大地提升城市的综合承灾能力和恢复力。因而结合应急需要，以及城市现有的公共服务设施体系构成。

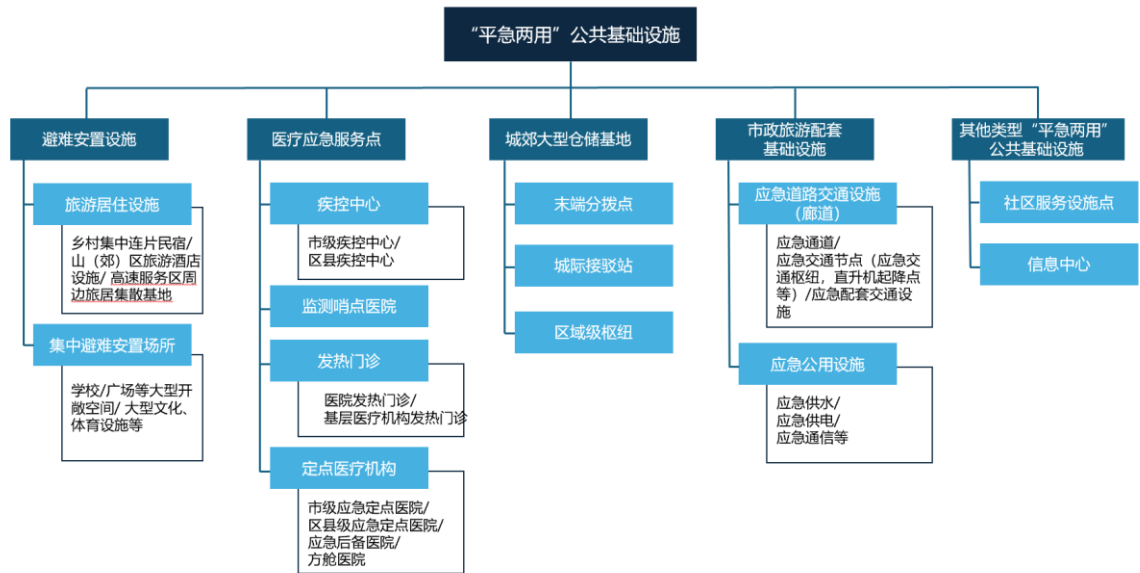

图 2-2 “平急两用”公共基础设施类型图

(4) 设施体系衔接机制

“平急两用”设施体系并不是孤立存在的，而是要嵌入

到应急管理的功能链条之中。每类设施应与应急设施体系模块衔接。应急交通通道服务于“物资保障与救援投送”，避难安置设施对应“避险安置”，医疗设施对应“医疗救治”，物资储备与配送体系强化“物资保障”，指挥设施保障“指挥调度”，救援中心构成“救援力量”，训练演练基地检验和完善“演练预案”，宣教科普设施承担“社会动员”。这种一一对应的关系，既明确了各类设施在应急体系中的功能定位，也避免了职能重叠和资源浪费。

衔接全市应急响应机制，建立“平急两用”公共基础设施分区分类分级应急响应、启用机制。

例如《九江市突发事件总体应急预案》中结合突发事件分级明确分级响应机制，按照其性质、严重程度、可控性和影响范围等因素，一般分为四级：特别重大、重大、较大、一般。市级层面应急响应由低到高分四级：四级、三级、二级、一级。

四级响应：超出县级政府应对能力的一般突发事件处置响应，原则上由县级政府指挥，跨县域由市级牵头部门协调。突发事件处置牵头部门迅速对突发事件发展趋势做出研判，组织调动应急资源和力量，协助属地政府开展突发事件的应对工作。必要时，可成立突发事件现场应对工作指导小组或应急处置专家组，指导突发事件的应急处置工作。按照应急预案相关要求，突发事件牵头处置部门要加强与应急预案成

员单位之间的联系，积极组织联防联控和应对行动，及时向上级党委、政府报告突发事件处置进展情况，适时提出响应级别调整的意见建议。

三级响应：突发事件达到较大级别，需要统筹多个市级部门共同处置并调动市级主要应急资源和力量等条件时，启动市级三级响应，成立专项指挥部，全面负责突发事件的应对工作。依法依规组织突发事件应对工作，及时向本级主要领导和上级报告突发事件处置进展情况，提出突发事件处置资源力量和响应级别调整的意见建议。

二级响应：当突发事件的事态发展持续蔓延、危害影响继续扩大、需要继续补充应急资源和力量，或突发事件达到重大以上级别，启动市级二级响应。突发事件涉及跨市级行政区域，或超出市政府应对能力，因此由市委、市政府主要负责同志或指定的负责同志组织指挥先期处置，并报省委、省政府组织指挥或指导协调处置。

一级响应：主要是指特别重大、重大突发事件处置响应，由市委、市政府主要负责同志组织指挥先期处置，并报省委、省政府组织指挥处置（必要时报请国务院或国家相关部门组织指导协调）。

突发事件应对遵循分级负责、属地为主、分类应对、协调联动的原则。县（市、区）人民政府负责应对的各类突发事件，由九江市人民政府相关部门牵头响应支援，具体在专

项应急预案中予以明确。县级以上人民政府应急管理、卫生健康、公安等部门在各自职责范围内做好自然灾害、事故灾难、公共卫生事件、社会安全事件等突发事件应对工作，并指导、协调下级人民政府及其相关部门做好有关突发事件的应对工作。

分区调度指引。明确市域内分区域调度方向与内容。结合人口规模与空间分布、“平急两用”公共基础设施规划储备情况，以区（县）、街道（镇）为基本单元，分析属地内各类“平急两用”公共基础设施的供需对比情况，针对各“平急两用”应用场景，明确“急时”各基本单元所需承担外溢和需对外转移的应急保障任务、对应“平急两用”公共基础设施启用清单与次序、各单元间的对口调度方向。

“平急两用”公共基础设施可以重点考虑现有的体育设施、教育设施、文化设施和医疗设施，并充分利用现状资源。

**与公共体育设施体系的衔接。**公共体育设施是“平急两用”体系的核心载体。其衔接路径在于充分利用其空间开阔、结构坚固和配套设施齐全的优势。平时，这些设施服务于全民健身与赛事活动；急时，市级大型体育中心可快速转换为方舱医院、应急物资枢纽或救援人员驻地，而社区级体育公园与健身中心则可作为临时避难所或社区物资分发点。实现衔接的关键，是在设计中预埋水电、通风与网络接口，并采用灵活隔断，以满足应急功能对空间与基础设施的特定需求。

**与教育设施体系的衔接。**教育设施布局广泛、贴近社区，是构建基层应急响应网络的关键节点。其衔接路径侧重于将校园转化为社区的“安全岛”。平时，学校履行教育教学职能；急时，中小学校和职业院校的操场、体育馆及部分教室可转换为应急避难场所或社区指挥中心，其固有的网络与设备资源还能支撑线上教学与信息传递。实现这一转换，需在校园规划中预先划定应急功能区，并制定与教学日程无缝衔接的启用预案。

**与公共文化设施体系的衔接。**公共文化设施的衔接路径，在于发挥其空间品质高与公共性强的特点。平时，图书馆、展览馆、文化馆是市民进行文化活动和信息获取的场所；急时，其宽敞、安静的室内空间可迅速转换为临时物资仓储站、信息发布与咨询中心或心理疏导空间。为此，在设施设计中需提前考虑楼面荷载能力以应对物资堆放，并强化数字化基础设施以确保紧急状态下的信息畅通。

**与医疗卫生设施体系的衔接。**医疗卫生设施自身就是应急前沿，其“平急两用”衔接路径的核心在于增强弹性与扩展能力。平时，综合医院与社区卫生服务中心提供日常诊疗与服务；急时，通过“可转换病房”的模块化设计，医院能快速将普通病区改造为传染病隔离病区，社区卫生服务中心则可转变为分级诊疗的前沿哨点。衔接的关键在于推广“三区两通道”的标准化设计，并加强医联体内部的资源协同与统一调度能

力。

## 4.2.2 “平急两用”公共基础设施空间布局

### (1) 总体规划进行网络规划并预留弹性用地

总体规划中增加“平急两用”功能复合利用的要求，指导“平急两用”专项规划的设施空间布局。国土空间总体规划中进行全域统筹。依据主要灾害类型与平急复合需求，在总体空间结构中提出安全网络，明确防护格局、救援走廊与安置节点；在城市更新、产业与居住布局中预留“急时”弹性空间，作为应急转换与扩展区域，如集散广场、临时安置地、物资前置点。

具体而言，规划应基于城市面临的主要灾害类型及其空间分布特征，结合“平急复合功能需求，在总体空间结构中构建完善的安全韧性网络。这一网络应包括三个核心要素：

- 防护格局：依据灾害风险评估结果，划定不同等级的防灾分区，明确生态隔离带、防洪排涝区等防护空间，形成多层次的城市安全屏障体系；
- 救援走廊：结合城市干路网系统，构建分级分类的应急通道网络，确保救援力量能够快速抵达灾害现场，保障应急物资的高效运输；
- 安置节点：建立“市级-区级-社区级”三级应急避难场所体系，明确各级别避难场所的空间布局和服务范围。

同时，规划应在城市更新区域、产业园区和居住区等不同类型的功能区内，前瞻性地预留“急时”弹性空间。这些空间包括但不限于集散广场、临时安置场地、物资前置储备点等，为应急状态下的功能转换和空间扩展提供必要的用地保障。

## **(2) “平急两用”公共基础设施专项规划深化总体规划的底线管控和空间结构要求**

“平急两用”公共基础设施专项规划在空间布局层面，必须严格遵循国土空间总体规划确立的底线管控要求，并参考总体规划的城市空间结构以及公共服务设施结构体系，通过分级分类的设施布局，实现与城市整体空间格局的深度融合。“平急两用”公共基础设施专项规划需要在总体规划的框架指导下，从设施结构布局、应急分区划定和具体设施布局三个层面深化空间布局，构建系统完善、分级有序的“平急两用”设施网络体系。

### **a 设施结构布局层面的系统衔接**

在设施结构布局层面，专项规划应充分对接总体规划确定的安全网络体系，并严格遵循总体规划划定的“三区三线”管控要求。通过构建“核心节点-区域枢纽-社区网点”三级设施布局结构，形成与城市空间结构相协调的“平急两用”设施网络。这一层级体系的确立，既体现了与总体规划空间格局的深度契合，也确保了应急设施服务的全域覆盖和高效运行。



核心节点的布局具有战略性意义，应当优先布局在城镇开发边界内的城市重点功能区。这些节点对应市级应急指挥中心、大型医疗设施等战略性设施，其布局必须确保与城市主要功能中心的空间协同，充分利用总体规划预留的重大基础设施廊道。核心节点的选址需要考虑与城市交通枢纽、行政中心的密切联系，同时要保证其在灾害发生时的可达性和安全性，形成城市应急体系的"大脑"和"心脏"。

区域枢纽的布局承担着承上启下的关键作用，需要结合区级公共服务核心进行统筹安排。这些枢纽承担片区级应急服务功能，服务半径通常覆盖多个街道或乡镇。在用地保障方面，应当充分利用总体规划确定的公共服务设施用地，优先使用存量建设用地的低效用地，通过功能复合和空间共享，提高土地利用效率，实现应急服务与日常公共服务的有序衔接。

社区网点作为应急服务体系的基础单元，其布局直接关系到应急服务的"最后一公里"效能。这些网点需要通过盘活低效用地和存量建筑，在社区层面实现基层应急服务的全覆盖。在布局过程中，必须严格避让永久基本农田和生态保护红线，同时要充分考虑服务半径和人口分布特征，确保在应急状态下能够快速响应、有效服务。

## **b 应急分区划定层面的精准衔接**

在应急分区划定层面，专项规划应基于总体规划的防灾

分区，进一步细化划定“平急两用”功能区。这些功能区的划定需要综合考虑行政区划、人口分布、灾害风险、设施现状等多重因素，并严格遵循城镇开发边界约束，形成分级负责、属地管理的应急空间单元体系。

城镇开发边界内是“平急两用”设施布局的重点区域，应当重点布局高密度、高频率使用的设施类型。这些区域要充分利用城市更新机会，通过整合低效用地，提升设施服务效能。具体而言，可以在城市更新项目中同步配建社区级应急设施，通过对存量建筑的改造利用，实现应急功能的嵌入式发展。同时，要注重设施的服务半径覆盖，确保在应急状态下能够快速响应。

城镇开发边界外的设施布局需要更加注重生态保护和集约用地。在这些区域，可以在避让永久基本农田和生态保护红线的前提下，适度布局大型仓储基地、区域性隔离设施等占地规模较大的应急设施。这类设施的选址要确保其与周边生态环境相协调，同时考虑到与主要交通干道的连接，保障应急救援和物资运输的效率。对于确实需要占用少量耕地的项目，要严格执行“占补平衡”政策。

### **c 具体设施布局层面的实施衔接**

在具体设施布局层面，专项规划应优先将应急避难设施、城郊大型仓储基地等关键设施布局在总体规划预留的“急时”弹性空间内，并充分衔接各类空间管控要求。这一层面的布

局直接关系到规划的实施效果，需要结合具体设施类型制定差异化的布局策略。

应急避难设施的布局要充分利用城市公园、广场、体育场馆等开敞空间，优先选择总体规划中确定的战略性留白用地。这些设施的布局要确保其与救援走廊的有效连接，同时要配备必要的基础设施，满足应急状态下的基本生活需求。在设计中要考虑到不同灾害类型的特殊性，制定相应的启用预案和管理办法，确保在需要时能够快速启用并有效运行。

城郊大型仓储基地的选址需要综合考虑多重要素，既要避让优质耕地和生态敏感区，又要优先利用总体规划中的物流仓储用地和低效工业用地。这类设施应当与物流枢纽、产业园区等形成功能协同，实现平时物流与急时物资保障的有机统一。在空间布局上，要紧密结合高速公路出入口、铁路货站等交通枢纽，保障物资运输的高效畅通，同时要预留足够的发展空间，满足未来应急保障需求的变化。

医疗应急服务点的布局要结合现有医疗卫生设施体系，重点加强基层网点的应急功能配置。通过城市更新整合零星低效用地，完善社区级医疗服务网络，形成分级诊疗、快速响应的医疗应急体系。在设施配置上，要按照"市级-区级-社区级"三级体系，实现医疗应急服务的全域覆盖。特别要加强基层医疗机构的应急能力建设，使其在平时承担基本医疗服务，在急时能够快速转换为应急医疗点。

市政旅游配套基础设施的协同建设。充分考虑总体规划的路网体系对“平急两用”市政旅游配套基础设施的要求。一是道路系统衔接要依据总体规划确定的道路等级和功能，合理配置应急交通设施。主要应急通道应满足大型救援设备通行要求，次要通道要保障应急疏散需求。对于旅游集聚区，要统筹考虑平时旅游交通和急时救援交通的双重需求，建立可转换的交通组织方案。二是市政基础设施要按照“适度超前、留有余量”的原则进行规划建设。供水系统要形成环状网络，配备应急水源和净化设施，考虑即使需求；供电系统要建立双电源保障，重要设施应配备应急发电设备；通信系统要实现多重备份，确保极端情况下的通信畅通。通景公路要统筹考虑游客疏散和应急救援的需求。

### **4.3 协同其他专项规划的内容**

#### **4.3.1 与综合防灾规划衔接：建立“风险评估-空间布局-设施配置”衔接**

“平急两用”公共基础设施专项规划与综合防灾规划衔接，需要从风险防控到设施配置总体考虑，综合防灾规划也是“平急两用”公共基础设施专项规划制定重要参考。具体通过以下三个层面建立深度衔接：

##### **（1）风险评估层面的基础数据衔接**

在风险评估层面，建立直接采用与转化应用的衔接机制。专项规划可直接采用综合防灾规划已完成的灾害风险评估

成果，包括地震灾害风险评估报告、洪涝风险区划图、地质灾害易发分区图等权威数据。将评估确定的灾害高风险区直接划定为“平急两用”设施的禁止建设区域，中风险区作为限制建设区域，低风险区则作为优先选址区域。

同时，建立风险评估成果的转化应用机制。根据不同类型灾害的风险特征，制定差异化的设施设防标准，例如位于地震高烈度区的设施，抗震设防标准应在本地区标准基础上提高一度；在地质灾害中风险区建设的设施，必须完成相应的边坡治理和地基加固工程。通过这种衔接，确保“平急两用”设施在选址阶段就充分考虑了各类灾害风险因素。

## （2）空间布局层面衔接

在空间布局层面，建立设施体系与避难场所系统的对应衔接机制。将综合防灾规划确定的避难场所体系与“平急两用”设施体系进行直接对应和功能整合。具体对应关系如下：

中心避难场所与市级核心节点对应，承担区域级应急指挥、医疗救治和物资调配功能；固定避难场所与区级区域枢纽对应，提供片区级应急服务；紧急避难场所与社区网点对应，满足基层应急需求，服务半径 500 米。

此外，建立统一的空间配置标准体系。包括：人均应急避难面积不低于 2 平方米等，应急供电容量满足基本照明和医疗设备运行需求。通过这些统一标准的实施，确保两大规

划体系在空间布局上的协调一致。

### (3) 设施配置层面衔接

在设施配置层面，重点推进救援通道网络与生命线系统的协同建设。将综合防灾规划确定的救援通道系统与"平急两用"设施的应急交通需求进行空间叠加和功能整合。具体包括：

救援主干通道与"平急两用"核心节点的连接通道统一按照综合防灾规划的应急通道要求。同时，在通道沿线统一设置应急标识系统，包括夜间反光标志、应急指示牌等。

在生命线系统建设方面，建立统一的工程技术标准。包括应急供水系统采用双回路设计，配备应急水源和净化设备；供电系统实现双电源保障，重要设施配备应急发电设备；通信系统建立多路由保障，确保应急状态下通信畅通。通过这些统一的标准和要求，实现两大规划在基础设施配置层面的深度融合。

## 3.2 与公共卫生规划的具体衔接

建立"数据共享-标准统一-资源调配"衔接机制。共享医疗卫生设施数据库，包括医院等级、床位数、ICU床位比例等28项核心数据。统一设施配置标准，将哨点医院服务半径限定在3公里以内，发热门诊纳入15分钟医疗圈规划。建立医疗资源动态调配机制，明确三级医院在应急状态下可转换床位比例不低于20%，ICU转换比例不低于30%，并制定

具体的转换流程和时限要求。

### **4.3.2 与公共卫生规划衔接：数据、标准统一与医疗设施衔接**

"平急两用"公共基础设施专项规划与公共卫生规划从数据共享到资源调配的全过程协同。这一衔接机制的确立，将确保公共卫生应急资源与基础设施空间布局实现有效对接，提升城市应对突发公共卫生事件的能力。

#### **(1) 基础数据的对接和共享**

建立医疗卫生基础数据的实时共享机制是规划衔接的基础。专项规划应直接对接公共卫生规划的医疗卫生设施数据库，实现核心数据的动态更新与共享。这些数据包括医疗机构的基础信息、床位资源配置、重症救治能力、人员配备情况和设备配置状况等关键要素。通过建立统一的数据共享平台，实现"平急两用"设施管理部门与卫生健康部门之间的数据实时交互，为规划决策提供准确依据。

为确保数据的有效性和可靠性，需要建立完善的数据质量管控机制。这包括制定统一的数据采集标准、明确每月更新的频率要求，以及建立严格的数据核查程序。通过这些措施，可以确保共享数据的准确性、及时性和完整性，为"平急两用"设施的规划布局和资源配置提供可靠的数据支撑。

#### **(2) 配置标准统一**

在设施配置标准方面，需要建立与公共卫生规划相统一的技术标准体系。首先是设施布局标准，要求哨点医院服务半径严格限定在 3 公里以内，发热门诊纳入 15 分钟医疗圈规划范围，定点救治医院布局要与人口分布密度相匹配。这些标准的统一将确保医疗资源的合理分布和有效覆盖。

其次是具体的设施配置标准，包括普通病床单元面积不低于 8 平方米，ICU 床单元面积不低于 15 平方米，负压病房换气次数不低于 12 次/小时等重要指标。同时，还需要制定设备配置标准，如每床配备监护仪比例不低于 1:1，每 10 床配备呼吸机不少于 1 台等要求。这些统一的标准将确保"平急两用"医疗设施的建设质量和服务能力。

### （3）充分利用公共卫生规划中现有以及规划的设施

充分对接公共卫生规划中的现有医疗设施体系，系统整合各级医疗机构资源。重点将综合医院、专科医院、社区卫生服务中心等现有设施纳入"平急两用"体系，通过功能优化和设施改造，实现日常医疗与应急救治的有效衔接。对规划新建的医疗设施，要求在项目前期就融入"平急两用"设计理念，预留应急转换空间和设备接口。

将规划确定的区域医疗中心、县域医疗中心作为重大疫情救治基地，承担重症患者集中救治功能；将二级医院作为应急救治主力，配备可转换病区和应急医疗设备；扩展基层医疗卫生机构作为疫情监测哨点，发挥早期发现和初步处置



作用。通过分级配置，形成覆盖全域、层次分明的应急医疗救治网络。

### **4.3.3 与交通物流规划衔接：城郊大仓的选址和布局**

"平急两用"公共基础设施专项规划需依托现有交通路网和物流设施布局，建立科学合理的城郊大仓选址体系，确保应急状态下物资保障的高效可靠。

#### **（1）基于现状交通条件的选址原则**

专项规划应严格遵循"依托现有、优化提升"的选址原则，充分对接交通物流规划中的现状路网体系和物流设施布局。在交通可达性方面，可以优先选择同时毗邻高速公路出入口和国省干道的区域，确保至少有两个不同方向的对外连接通道。选址点与城市中心区的通行时间应控制在 30 分钟以内，与区域交通枢纽的距离不超过 50 公里，以保证应急物资的快速集散。

在设施基础条件评估方面，重点考察现有物流园区、工业仓储区的改建条件。包括评估建筑结构安全性/核查空间尺度/检测地面荷载能力等。同时，还需要考察周边市政配套设施，确保双回路供电、应急供水和污水处理能力满足应急运营需求。

#### **（2）分级分类的设施布局体系**

根据交通物流规划确定的物流节点体系，构建分级分类

的城郊大仓布局网络。一级核心枢纽选址于区域性物流枢纽周边，依托高速公路网络和铁路货运站，参考区域枢纽的服务范围和用地规模，配备完善的装卸货区和专业化仓储设施。

二级区域节点布局在主要公路交汇处。这些节点重点保障地区性物资调配，配备标准化仓库。三级终端网点则结合城乡配送体系，主要承担"最后一公里"配送功能，实现与社区级应急设施的有效衔接。

#### **4.3.4 与文旅规划衔接：旅游居住设施与酒店民宿的衔接**

"平急两用"公共基础设施专项规划与文旅规划的核心衔接点在于酒店设施的统筹布局与功能复合利用。

##### **(1) “平急两用”规划中旅居隔离设施与现有酒店配置和分布衔接**

基于文旅规划中的酒店级别，尽量选择三星及以下酒店，因为没有配置中央空调，符合隔离要求。并且选择产权相对单一，便于协调的酒店。民宿选择连片以及尽量由企业开发管理的。

布局上空间相对独立的酒店和民宿。选择酒店设施选址于山区或城郊并且交通便捷的，要求客房规模不少于 50 间，具备完善的配套设施和独立排污和空调。民宿选择郊区连片民宿，集中房间不少于 30 间。

## **(2) 文旅规划考虑一定规模的隔离酒店新建和改建**

文旅规划中根据隔离规模要求，建议确定一定合适的新建酒店项目选址必须满足“平急两用”的基本要求：避开地震断裂带、洪涝灾害高风险区等地质灾害区域；保证双通道出入，确保应急交通畅通；与周边居民区保持适当距离，设置必要的缓冲隔离带。

对现有酒店设施进行改造潜力评估，重点考察建筑结构安全性、空间布局合理性、设施设备完备性等要素。建立酒店设施改造清单，按照“优先改造、分批实施”的原则，制定三年改造计划。改造内容主要包括：通风系统升级、给排水系统分离、应急电源配置、医疗废物处理设施增设等。

### **4.3.5 与城市更新规划的衔接：空间和设施的整理和预留**

“平急两用”公共基础设施专项规划与城市更新规划需要通过系统化的衔接机制，将应急功能有机植入城市更新全过程。这一衔接机制的确立，将有效盘活存量空间资源，提升建成区的综合应急保障能力。

#### **(1) 空间改造层面的系统整合**

在空间改造层面，考虑用地预留。比如要求老旧小区更新改造必须预留不低于总用地面积10%的应急空间，其中5%用于固定应急设施建设，5%作为弹性发展备用地。应急空间

的选址需满足以下标准：地势相对较高，避开地质灾害易发区；保证双通道出入，确保应急交通畅通；与主要建筑保持适当安全距离。具体预留可考虑社区广场平时作为居民活动场所，应急状态下 24 小时内转换为临时安置区；地下停车场在 48 小时内转换为应急医疗点；社区服务中心在 12 小时内转换为应急指挥所

针对不同类型更新区域制定差异化改造策略。在老旧住区重点改造闲置建筑和低效空间，将废弃锅炉房、闲置车库等改造为应急物资储备点；在工业区更新中保留结构良好的厂房空间，改造为区域性应急指挥中心；在商业区更新中合理利用地下空间，建设具备防护功能的应急避难场所等。

## **（2）设施增配层面的精准施策**

在设施增配层面，可以在更新规划中考虑建立分级分类的设施配置体系。社区级应急设施按照“5 分钟应急响应圈”配置，包括应急供水点、微型物资储备库和紧急医疗点等。区域级设施配置标准化应急指挥中心、中型物资储备库和临时安置点。

### **4.3.6 与地下空间规划衔接：设施和空间衔接**

#### **（1）地下空间设施体系的统筹整合**

可以考虑将合适的人防工程、地下综合体、地下停车场等各类地下空间纳入“平急两用”设施体系。重点将早期人防

工程改造为应急物资储备库，要求单个工程储备面积不低于一定面积，配备完善的通风、除湿和消防系统。

地下停车场设置应急功能区，预留不少于总停车位 10% 的应急车辆停放区，并配备专用通道和充电设施。地下商业空间规划预留应急指挥、医疗救护功能区域。

## **(2) 地下空间布局的协同优化**

在地下空间布局层面，建立与地面应急设施的立体化衔接。重点在以下区域布局地下应急设施：城市中心区的地下空间与地面应急指挥中心直连；居住区地下空间与社区应急避难场所互通；重要交通枢纽地区的地下空间预留应急疏散和物资转运功能。

建立地下空间互联互通。地下空间需要形成网络化布局。满足应急车辆通行需求。在地下空间节点位置设置应急照明、通风和导引系统，确保应急状态下的安全使用。同时，严格控制地下空间开发强度，保证足够的结构安全储备。

## **4.4 指导详细规划编制控制性指标、布局、控制线等**

"平急两用"公共基础设施专项规划与控制性详细规划（以下简称"控规"）的衔接是实现规划落地实施的关键环节。专项规划作为承上启下的重要规划层次，既要落实总体规划的战略要求，又要通过控规实现空间落地和建设管控。这种衔接不仅体现在空间布局的传导，更需要建立完善的指标体

系、管控规则和实施机制，确保“平急两用”设施在规划、建设、运营全周期中能够实现平急功能的有机转换。

### **一是在控规单元层面总体管控：**

#### **（1）规划指标的逐级传导**

专项规划应当将总体规划确定的“平急两用”设施规模、覆盖标准等宏观指标，科学分解到各个控规单元。这一过程需要建立量化的指标体系，包括但不限于：每个单元内应急避难场所的最小面积要求、医疗应急服务点的服务人口基数、物资储备设施的服务半径等。例如，对于应急避难场所，可以按照服务人口 1.5-2.0 平方米/人的标准，结合单元内预测人口规模，确定具体的用地面积指标。

在指标分解过程中，需要充分考虑各单元的人口特征、空间特征和风险特征。对于人口密集的老城区，应当适当提高设施配置标准；对于灾害风险较高的区域，需要增加设施冗余度。同时，要建立指标的动态调整机制，根据城市发展和人口变化情况，定期评估和优化指标分配。

#### **（2）空间布局的精准落位**

专项规划应当指导控规单元明确各类“平急两用”设施的具体空间布局。这包括确定设施的具体用地边界、建设规模、空间形态以及与周边环境的关系。例如对于应急医疗设施，要明确其与主要居住区、交通枢纽的空间关系；对于物资储

备设施，要确保其与物流通道的有效连接。

另外，将社区服务设施、公建配套、商业服务、绿地开敞空间、规划留白地等“平急两用”专项规划中系统规划的内容纳入可转换空间清单，在空间地块中列出可转换空间规模及设施数量和分布位置。

### **（3）指导控制线体系的细化落实**

专项规划应当指导控规单元细化落实各类控制线要求。包括明确应急通道的控制红线，确保其宽度和线型满足应急通行需求；划定重要设施的安全防护范围，建立必要的隔离缓冲带等。

### **（4）可转换空间清单的建立**

专项规划应当指导控规单元建立完善的“平急两用”可转换空间清单。这个清单应当包括：社区服务设施中的可转换空间，如社区中心、文化活动站等；公建配套中的可转换空间，如学校体育馆、图书馆等；商业服务设施中的可转换空间，如大型商场、酒店等；绿地开敞空间中的可转换空间，如公园绿地、广场等；以及规划留白用地中的可转换潜力。

在清单建立过程中，需要对每个可转换空间进行详细评估，包括其现状条件、转换潜力、改造难度、运营成本等要素。同时，要明确不同空间在不同应急场景下的转换功能和转换时序，形成层次分明、功能清晰的可转换空间体系。这

个清单应当作为控规的重要附件，指导后续的规划管理和设施建设。

### **（5）工程条件的细化要求**

专项规划应当指导控规单元细化落实"平急两用"设施转换所需的各项工程条件。在交通组织方面，要明确应急状态下的交通流线组织、停车需求、出入口设置等要求；在给排水系统方面，要确定应急供水量标准、污水处理要求、雨水管理措施等；在电力系统方面，要明确供电负荷等级、备用电源配置、配电设施布局等；在通信系统方面，要确保应急通信的覆盖范围和信号质量。

这些工程条件的细化要求应当与城市基础设施专项规划充分衔接，确保技术标准的统一和系统运行的协调。同时，要考虑到不同设施的特殊需求，制定差异化的工程配置标准。例如，对于承担重要指挥功能的设施，应当采用更高的供电和通信保障标准；对于人员密集的避难场所，需要配置更完善的给排水和卫生设施。

## **二是指导地块层面的精细化管控：**

### **（1）平急双态设计的管控要求**

在规划许可阶段，应当建立"平急双态设计"的强制性报批要求。这一要求应当包括：明确建设项目在规划和建筑设计阶段就必须同时考虑平时使用和应急转换的双重需求；要



求设计单位提供详细的功能转换方案，包括空间转换方式、设施设备配置、流线组织调整等具体内容；建立设计方案的双重审查机制，确保平时功能和应急功能都得到充分保障。

对于不同类型的“平急两用”空间，应当制定差异化的设计标准。例如，对于可转换为应急医疗设施的建设项目，需要重点考虑病房单元的模块化设计、医患流线分离、通风系统转换等技术要求；对于可转换为应急指挥中心的建设项目，需要特别关注信息基础设施的冗余配置、安全防护措施、应急供电保障等特殊需求。

## **（2）权属关系与使用边界管理**

在地块管控中，必须明确“平急两用”设施在平时和应急状态下的权属关系、使用边界和开放条件。这包括：界定设施在应急状态下的征用条件和补偿机制；明确不同权属主体在设施维护、管理和使用中的责任义务；建立设施转换时的协调机制和决策程序。

对于权属复杂的设施，应当通过法律协议明确各方的权利义务，确保在应急状态下能够快速实现功能转换。同时，要建立使用边界的管理制度，包括平时使用时的限制条件、应急启用时的管理要求、以及功能转换时的过渡安排。这些内容都应当作为规划许可的附加条件，在项目审批时予以明确。

### **(3) 功能转换条款的制定**

在地块管控中，必须制定详细的功能转换条款。这些条款应当包括：明确不同应急情景下的功能转换触发条件和转换流程；规定临时设施的布置要求和设置标准；制定人员疏散和安置的组织方案；明确应急状态结束后的恢复条件和程序。

功能转换条款的制定需要结合具体设施的特点和可能面临的应急场景，确保其可操作性和实效性。例如，对于承担应急避难功能的设施，要详细规定避难区域的划分、基本生活设施的配置、卫生防疫措施的实施等具体要求；对于承担应急医疗功能的设施，要明确病区划分标准、医疗设备配置、感染控制要求等专业内容。

## **4.5 编制内容衔接小结**

根据具体衔接内容，梳理形成两个表格，一是“平急两用”公共基础设施专项规划编制中需要参考或者协调的内容，如附表 1。另外，是根据“平急两用”公共基础设施专项规划的要求，建议其他规划增补的内容，如附表 2。通过这两个表格，更好建立编制过程中“平急两用”公共基础设施专项规划与其他各类规划的衔接机制。

## 5. “平急两用”公共基础设施专项规划建设实施和评估 反馈的衔接

### 5.1 建设实施衔接：从规划方案到项目落地

#### 5.1.1 衔接核心：构建“规-建-治”闭环，破解项目落地难题

“平急两用”公共基础设施专项规划的生命力在于实施。其核心使命，是将关于安全与韧性的战略蓝图，系统转化为可落地、可考核、可运营的实体工程与管理能力。当前，我国在此领域尚处于探索阶段，普遍存在“规划-建设-治理”链条断裂的困境。规划成果往往停留在空间布局方案层面，与后续的项目建设计划、投资安排、土地供应、运营管理衔接不畅，导致“规划一套、做起来另一套”。同时，平急两用设施横跨住房城乡建设、自然资源、发展改革、应急管理、卫生健康、交通运输等多个部门，权责边界模糊，信息壁垒林立，协同推进难度巨大。因此，本章节旨在系统构建从规划到实施的全链条衔接路径，核心任务是解决两大问题：一是如何形成“规-建-治”全过程的制度化闭环，确保规划目标和具体布局方案的顺畅传导与动态落实；二是如何建立跨部门、多主体的高效协同机制，保障设施在全生命周期内均能高效运转。最终目标是形成以规划为统领、项目为抓手、治理为支撑的有机整体，保证“平急两用”设施可以落地。

### 5.1.2 主体协同：明确“政府-市场-社会”的权责边界

实现“平急两用”设施的有效落地与运维，必须构建一个权责清晰、分层负责、多元共治的责任共同体。首先，决策与监管层是体系的“大脑”。地方政府作为最终责任主体，负责顶层设计、统筹协调与监督考核，将专项规划的核心目标纳入城市公共投资与基础设施建设的中长期计划。住房城乡建设部门作为行业牵头单位，负责技术标准制定、建设过程指导与工程质量监管。发展改革部门负责项目立项审批与全生命周期绩效管理，其决策需紧密对接总体规划的近期建设计划与专项规划形成的“项目一张图”。财政部门则负责建设与运营资金的预算保障与拨付监管，并需前瞻性地研究制定“急时”征用与启用的财政补贴、税收减免等激励政策。

其次，执行与实施层是体系的“手脚”。项目业主或投资方（可能是政府平台公司、社会资本或政企合作的项目公司）是项目建设的直接责任主体，全面负责从设计、采购、施工到竣工验收的全过程管理。设计单位的职责至关重要，必须在建筑方案与施工图设计阶段，就将“平急转换”的功能需求、空间布局、流线组织、技术参数等刚性要求融入其中。施工与监理单位则需确保工程实体质量完全符合“平急两用”的特殊标准，保障结构安全可靠、设备系统冗余备份、管线接口预留充分。设施建成后，运营管理机构承担起日常维护与应急转换的双重职责，必须确保设施“平时”服务品质与“急时”

一键响应的能力。

最后，建立多主体协同机制是打破部门壁垒的关键。需要通过建立联席会议制度、联合审查机制、信息共享平台等制度化安排，构建起“政府主导、企业主体、社会参与”的纵向责任链与横向协作网，确保规划、建设、治理各环节信息畅通、职责衔接、行动同步。

### **5.1.3 流程闭环：打通从“蓝图”到“项目”的传导路径**

为确保规划目标能逐级分解并转化为具体的城市建设行动，必须建立一个稳定、可预期的项目生成与推进机制。这一机制体现为从宏观到微观的六级传导路径。

**（1）从规划方案到行动计划。** 将“平急两用”设施纳入近期建设规划体系，实现规划一项目的嵌合。衔接国民经济与社会发展五年规划，并且在“平急两用”公共基础设施专项规划中提出具体的行动计划方案；明确未来 1-3 年的建设重点领域、空间导向、与发展规划对接形成估算总投资和牵头责任部门，将长远战略分解为可执行的阶段性任务。

**（2）从行动计划到项目储备库。** 各行业主管部门和区县依据行动计划，提报具体项目构想，进入动态管理的项目储备库。此阶段的关键是建立项目筛选标准，优先纳入规划符合度高、需求紧迫、用地落实条件好、前期工作成熟度高的项目，并初步按政府直接投资、市场化运作、政企合作等建设模式进行分类管理。

**（3）从项目储备库到年度建设计划。** 每年，发改部门会同住建部门，根据财政承受能力、土地供应计划和政治优先级，从储备库中筛选项目，形成《XX 年度“平急两用”项目建设计划》。该计划必须作为城市年度固定资产投资计划的专项子计划，确保其严肃性和资源保障。

**（4）从年度计划到项目可行性论证与立项。** 对于纳入年度计划的项目，由确定的建设主体组织开展可行性研究、初步设计等深度前期工作。此环节的**核心控制点**是建立“平急”功能专项审查制度，由住建、应急管理等部门组织专家，对项目的转换方案进行技术审查，实行“一票否决”，确保应急功能不因成本或设计简化而被牺牲。

**（5）从项目立项到资源精准配置。** 立项获批标志着项目正式进入实施通道。此时，项目信息必须同步至自然资源部门的“多规合一”业务协同平台，确保其空间坐标、控制指标与国土空间规划“一张图”无缝衔接。自然资源部门需据此制定**年度供地保障方案**，实现“地等项目”，为后续规划许可和施工许可提供基础。

**（6）从资源配置到开工建设与运营。** 在土地、资金等要素保障到位后，项目进入常规的工程建设程序。至此，规划方案成功转化为具体的城市建设工程，并通过严格的工程管理，最终形成实实在在的“平急两用”设施供给能力。

### 5.1.4 要素保障：做实“用地-资金-政策”的精准支撑

上述流程的顺畅运转，依赖于土地、资金、政策等关键要素的精准、协同保障。

在**用地保障**方面，需要与自然资源部门协同，根据项目类型采取差异化策略。对于**政府投资**的避难场所、物资储备库等纯公益性设施，以**划拨**方式供应土地，并在控制性详细规划中提前锁定用地性质。对于**市场化运作**的隔离酒店、物流仓储等设施，在土地“招拍挂”方案中，就必须将“平急两用”的规划设计条件、建设标准、应急征用与补偿协议作为前置条件，并可探索“规定功能、竞地价”等弹性出让方式。对于学校、体育场馆等**复合利用**的现有设施，重点是通过规划许可和资金补贴，激励产权方进行“平急”功能改造与提升。

表 5-1 “平急两用”项目的用地保障

| 项目类型              | 用地保障策略      | 操作要点                                         |
|-------------------|-------------|----------------------------------------------|
| 政府投资类（避难场所、物资仓库等） | 划拨或协议出让为主   | - 在控规中落实用地性质（如 U1 公用设施用地）。                   |
|                   |             | - 使用预留的公益性用地指标，优先保障。                         |
|                   |             | - 探索“代建租用”模式，降低政府初期土地成本。                     |
| 市场化类（隔离酒店、物流仓储等）  | 公开出让或长期租赁为主 | - 在土地出让前置条件中，明确“平急两用”的规划设计条件、建设标准、应急征用与补偿协议。 |
|                   |             | - 推行“规定功能、竞地价”或“规定地价、竞转换方案”等弹性出让方式。          |
| 复合利用类（体育中心、学校等）   | 现状用地功能提升    | - 不涉及新增用地，重点是通过规划许可，在改扩建时强制要求增加“平急”转换设计。     |
|                   |             | - 通过 <b>资金补贴或容积率奖励</b> ，激励产权单位进行适应性改造。       |

在**资金保障**方面，需构建多元化、可持续的投融资体系。**纯公益性项目**主要依靠**财政资金**，包括申请超长期特别国债、中央预算内投资、纳入地方政府专项债券项目库等。**准经营性项目**（如兼具物流与应急储备功能的仓储设施）应采用“**财政+金融+社会资本**”的**混合模式**，如设立政府引导基金、提供政策性贷款贴息、推广基础设施 REITs 等。对于**经营性项目**，关键在于建立清晰、可预期的“**急时**”征用补偿机制和**运营期补贴政策**，以稳定社会资本的投资回报预期，消除其后顾之忧。

**表 5-2 “平急两用”项目的资金保障**

| 项目类型   | 资金保障策略           | 操作要点                                    |
|--------|------------------|-----------------------------------------|
| 纯公益性项目 | 财政资金主导           | - 申请超长期特别国债、中央预算内投资等国家资金。               |
|        |                  | - 纳入地方政府专项债券支持范围，发行“韧性城市”专项债。           |
|        |                  | - 由市级财政专项资金直接安排。                        |
| 准经营性项目 | “财政+金融+社会资本”混合模式 | - 设立“平急两用”引导基金，通过股权投资吸引社会资本。            |
|        |                  | - 推广基础设施 REITs，盘活存量资产，为新项目融资。           |
|        |                  | - 提供政策性贷款贴息，降低融资成本。                     |
| 经营性项目  | 社会资本主导           | - 完善“急时”征用补偿机制，明确补偿标准、流程和资金来源，消除社会资本顾虑。 |
|        |                  | - 提供运营期补贴，弥补因承担应急功能带来的额外成本或收入损失。        |



在政策与制度保障方面，需进行一系列创新。首要任务是建立审批“绿色通道”，推行联合评审、并联审批，大幅压缩项目前期工作时间。其次，要加快制定覆盖设计、建设、转换、运营各环节的技术标准体系，如《“平急两用”设施设计导则》，为实践提供权威技术依据。最后，必须建立全生命周期绩效评估与动态管理机制，定期对已建成设施的“平急转换”效能进行评估，并将结果反馈至规划的修编和项目储备库的优化调整中，从而实现“规划-实施-反馈-优化”的良性循环，确保“平急两用”能力随着时间的推移而不断迭代增强。

## **5.2 评估反馈重点：形成“编制-建设实施-评估”的流程衔接闭环**

### **5.2.1 构建覆盖项目全周期的多层次评估体系**

为实现从宏观战略到微观运营的全方位把控，必须超越单一、孤立的评估模式，构建一个由**四大核心评估**构成的、贯穿“前-中-后”全周期的评估生态系统。该体系通过系统地回答“项目是否值得建？”、“建的是否符合要求？”、“运营得是否高效可靠？”以及“最终是否达成了战略目标？”这四个核心问题，形成一个从宏观到微观、从过程到结果的全息诊断系统。

### **5.2.2 事前评估：可行性评估——从源头规避决策风险**

可行性评估是项目生成的“过滤器”和规划落地的“第一块基石”。其核心目的在于项目立项或规划编制前，对项目的

必要性、合理性与可持续性进行前瞻性研判，确保公共资源投入的精准性和有效性。主要考虑以下内容：

战略必要性：重点考察项目与《国务院办公厅关于积极稳步推进超大特大城市“平急两用”公共基础设施建设的指导意见》等国家顶层战略的契合度，以及其在弥补城市应急体系短板、优化城市安全韧性格局中的具体作用。例如，需论证一个城郊大型仓储基地是否服务于构建“物资保障”核心模块，其布局是否与总体规划的应急空间结构相衔接。主要与“平急两用”专项规划中确定的项目进行对接和确认。

经济与财务可行性：这是实现“以平养急”的关键。需进行全生命周期成本效益分析，不仅要估算建设成本，更要精准预测“平时”运营的收入与成本，计算“运营成本覆盖率”。同时，必须设计可持续的投融资模式，明确财政资金、社会资本（如基础设施 REITs）、政策性贷款等不同资金的比例与回报机制，评估其在“急时”征用补偿政策下的财务韧性。

社会风险与可接受性：提前识别并评估项目的“邻避效应”，通过问卷、访谈等方式了解公众认知与接受度，为后续的公众沟通和参与策略制定提供依据，从源头预防社会不稳定因素。

### **5.2.3 事中评估：过程监测与合规性评估——确保建设过程不走样**

事中评估是对项目建设过程的动态控制，其核心是确保

工程实体严格遵循规划、设计与投资预算，是规划蓝图能否转化为高质量实体设施的关键环节。

进度与投资控制监测：依托“平急两用”公共基础设施管理系统，动态追踪项目是否按计划节点推进，资金使用是否合规、高效。将“建设累计完成投资额”等指标与年度计划进行比对，及时发现偏差并预警。

质量与合规性监测：这是事中评估的重中之重。审查工程建设质量是否达标，并专项核查“平急”功能的落实情况。例如，是否严格按照《“平急两用”公共基础设施“平急”功能转换技术标准》进行了冗余设计（如双回路供电、备用供水源）、是否预留了足够的设备接口和转换空间、建筑结构荷载是否满足应急仓储要求等。此阶段评估是对设计文件承诺的“实体化”验证。

功能符合性检查：在施工关键节点，检查建设的实体是否具备规划所要求的“平急”双重功能雏形，避免功能设计在施工阶段被简化或遗漏。

#### **5.2.4 事后评估**

##### **（1）安全监测与双适应评估——保障设施单元持续战备**

本评估在设施投入运营后启动，聚焦于单个设施单元的运营状态，是其持续保持“平时可用、急时顶用”能力的根本

保障。该评估体系需分级分类展开，根据不同设施类型（如旅居设施、医疗点、仓储基地）制定差异化的监测指标。

安全监测体系。包括监测对象与指标的评估，比如涵盖设施环境（如空气质量、水质）、结构安全、设备运行状态（如消防、供电、通风系统）、人员操作规范等。例如，对医疗应急服务点，需持续监测其 ICU 病房的负压系统、应急电源；对城郊大仓，需监测其仓储环境的温湿度、消防设施完好率。监测频次与方法结合实时自动化监测（如传感器）与定期人工巡检，形成“设施安全监测合格率”的量化结果。

双适应评估体系。一是平时运行能力与成本评估，用于评估设施在非应急状态下的服务能力、运营效率及成本效益，直接关联“平时运营可持续性”与“闲置设施数量占比”等指标。二是急时转换效率与成本评估，核心评估“已编制设施平急转换方案的设施占比”及方案的可行性。通过演练和测试，量化评估转换流程的顺畅度、转换耗时、资源消耗。例如，评估一个体育馆转换为方舱医院所需的时间、人力、物资投入，以及转换后医疗功能的完备性。三是效益综合评估。权衡“平时”运营收益与“急时”转换及维持成本，判断该设施双态运营的综合效益，为运营补贴和优化提供数据支撑。

## （2）实施效果综合评估——衡量战略层面的整体成效

从城市或区域宏观视角，对“平急两用”工作在一定周期内的整体成效进行系统性复盘，其结论直接服务于政府的战

略决策。其框架应涵盖三大维度，并借鉴国际国内先进评估体系（如 ISO 37123 韧性城市指标、安全韧性城市评价指南）的核心理念。

一是评估制度与机制建设情况：

政策体系完备度：评估地方实施方案与配套政策（土地、资金、审批）的成熟度，以及标准规范体系（设计、建设、运维）的健全性。

机制与资源保障：重点评估“跨部门协同工作机制健全性”和“财政补贴与补偿机制有效性”，判断是否建立了打破部门壁垒的治理结构和可持续的资金循环。

规划统筹与衔接：考核“平急两用专项规划编制”质量及其“与国土空间规划衔接度”，以及“项目列入规划、计划情况”，确保项目具有法定地位和资源保障。

二是评估建设与运营能力：

规划实施与建设成效：通过“设施规划目标完成率”、“设施空间布局合理性”、“项目结构合理性”等指标，评判设施网络的体系化建设成果。

“平时”运营水平：通过“运营可持续性”、“闲置设施占比”等，检验“以平养急”模式的实际成效。

“急时”转换与响应效能：通过“转换方案编制率”、“年度多部门联合演练频次”、“转换演练达标率”等，评估体系的实

战准备状态。

智慧化管理水平：通过“应用智能化技术的设施覆盖率”和“接入统一管理平台的设施覆盖率”，衡量体系的现代化治理能力。

三是效益与韧性提升：

经济效益：评估“创造就业岗位数量”和“拉动社会投资规模”，体现工作对经济发展的带动作用。

社会效益：评估“存量设施改造率”（盘活城市存量资源）和“宣传推广工作成效”（形成社会共识与示范效应）。

韧性提升：核心评估“公众认知与参与度”（社会动员能力）和“设施能力冗余度”（系统可靠性），直接反映城市整体安全韧性的增强程度。

**5.2.5 明晰权责一致的组织实施机制是评估工作落地的基本保障**

科学评估体系的运转，依赖于清晰的组织分工、规范的流程与可靠的数据基础。

**表 5-3 评估组织方式**

| 评估类型       | 建议牵头组织主体           | 核心评估对象        | 关键参与方                  | 建议评估周期 |
|------------|--------------------|---------------|------------------------|--------|
| 可行性评估      | 发展改革部门、住房城乡建设部门    | 拟纳入项目储备库的单个项目 | 自然资源、财政、行业主管部门、第三方咨询机构 | 项目立项前  |
| 过程监测与合规性评估 | 各行业主管部门（交通、卫健、文旅等） | 处于建设期的项目      | 项目建设单位、监理单位            | 季度/半年度 |

|                    |                                       |                              |                                         |                              |
|--------------------|---------------------------------------|------------------------------|-----------------------------------------|------------------------------|
| 安全监测<br>与双适应<br>评估 | 设施运营单位<br>(执行), 行业<br>主管部门 (监<br>管核查) | 已投入运营<br>的单个设施               | 设施管理团队、专<br>业检测机构                       | 实时监测+<br>年度评估                |
| 实施效果<br>综合评估       | 城市人民政府<br>(牵头), 住<br>建、发改部门<br>(具体组织) | 整个城市或<br>区域的“平<br>急两用”工<br>作 | 所有相关职能部<br>门、第三方权威机<br>构、专家委员会、<br>公众代表 | 每 2-3 年<br>(与规划<br>周期衔<br>接) |

### 5.2.6 构建刚性反馈闭环机制，推动系统持续优化

评估成果的有效转化与应用是衡量评估体系价值的关键所在。为实现“平急两用”公共基础设施从建设到运营全过程的持续改进，必须建立制度化、规范化的反馈路径，形成“评估-反馈-优化”的螺旋式上升闭环管理机制。

#### (1) 规划决策层面的反馈机制

反馈路径：实施效果综合评估与可行性评估的结论，应作为《“平急两用”公共基础设施专项规划》修编的核心依据，实现评估成果向规划决策的有效传导。

运行机制：目标体系动态校准机制：建立基于评估结果的规划目标调整程序。当评估显示某类设施“规划目标完成率”低于预期或“项目结构合理性”存在失衡时，启动规划修编程序，重新论证设施总量、类型配比和建设时序等关键参数。

空间布局持续优化机制：依据“设施空间布局合理性”评估结论，对服务覆盖盲区、应急响应薄弱环节进行精准识别，在规划修编中优先安排补点项目建设，并对全域设施网络进行战略性结构调整。

政策标准迭代升级机制：将“财政补贴与补偿机制有效性”评估结果直接应用于配套政策优化，同时基于安全监测中发现的共性技术问题，推动地方标准导则的制定与修订工作。

## **（2）建设管理层面的反馈机制**

反馈路径：过程监测与合规性评估数据，直接对接项目库动态管理系统，作为建设资源配置和项目管理决策的重要依据。

项目库分级管理制度：建立评估结果与项目状态联动的管理机制。对评估中发现严重质量或合规问题的项目，实施“暂停资金拨付-限期整改-重新论证”的处理流程，并将其从实施阶段的“建设库”退回至前期阶段的“储备库”。

资源分配激励约束机制：将过程评估结果与后续资源分配直接挂钩。对评估表现优良的项目，在后续资金安排和用地指标分配上给予优先支持；对评估不达标的项目，则采取相应的限制措施。

## **（3）运营优化层面的反馈机制**

反馈路径：安全监测与双适应评估结果，直接关联设施运营许可、财政补贴发放和更新改造计划，形成运营阶段的持续改进循环。

运营绩效挂钩机制：建立评估等级与政策支持的对对应关系。将年度安全与转换效能评估等级作为运营补贴、税费减



免等政策支持的核心依据,对评估不合格的设施实施“暂停补贴-整改达标-恢复支持”的管理措施。

系统优化触发机制:通过评估发现的转换流程瓶颈或设备缺陷,自动触发设施更新改造计划和应急预案的修订程序。对于共性问题,推动设立“设施更新改造专项资金”,实现系统性问题的集中解决。

#### **(4) 政策资源层面的反馈机制**

反馈路径:各类评估的综合性结论,通过专报形式汇交至城市人民政府,服务于宏观政策调整和跨部门资源统筹。

绩效考核应用机制:将实施效果综合评估结果纳入相关部门和下级政府的年度绩效考核体系,建立“评估-考核-问责”的联动机制。

政策创新驱动机制:基于评估反映的投融资模式等问题,由市政府统筹出台更具针对性的社会资本参与政策。同时,借鉴城市更新经验,建立《“平急两用”可复制经验做法清单》和典型案例定期发布制度。

公共治理推进机制:建立《“平急两用”年度评估白皮书》发布制度,通过信息公开促进公众认知与参与,增强政府公信力,构建共建共治共享的治理格局。

## **6. 政策建议**

为推动“平急两用”公共基础设施专项规划与建设实施

的有效衔接，建立从规划统筹到项目建设、再到运营治理的全链条支撑体系，应从制度建设、要素保障、投融资机制、实施监管与绩效反馈五个方面提出可操作的政策建议，并在制度完善、试点示范、用地保障、资金支持、能力建设五个方面提出政府工作的建议，见附表 3，并形成文件建议，见附件 3。

## **6.1 完善体制机制**

通过制度创新，确立“平急两用”工作的法定地位与权威性，构建权责清晰、协同高效的长效治理架构，为各项工作提供坚实的组织与制度保障。

**(1) 首要任务是推动“平急两用”专项规划的法定化。**应将其依法纳入国土空间规划体系，明确其作为重要专项规划的法定地位、编制程序与管控要求，确保其与国民经济和社会发展规划、国土空间总体规划等在目标、空间与时序上的深度融合，实现规划层面的“多规合一”。

**(2) 构建跨部门、跨层级的协同治理网络。**建议成立由市领导牵头的“平急两用”建设工作领导小组，并设立常设办公室(可设于发展改革委员会/住建部门)，统筹重大决策。核心是要建立“联合审查、并联审批”的常态化工作流程，将发改、自然资源、财政、应急管理、卫健等部门的职责有机整合，破除行政壁垒，形成政策合力。

**(3) 完善项目的全生命周期动态管理制度。**依托信息

化平台，构建“谋划库-储备库-建设库”三级项目清单，实现项目从生成、建设到运营的全流程可追溯管理。这一制度的关键在于实现项目库与发改、财政、自然资源等部门业务系统的数据共享与业务协同，确保项目推进与城市安全需求、资金计划和建设时序始终保持一致。

具体措施来看，可以考虑：

（1）建立审批“绿色通道”：建立“平急两用”项目联合审批机制，压缩立项、规划、环评、施工许可等环节的办理时限。

（2）完善标准与规范体系：加快制定《“平急两用”设施设计导则》、《“平急”转换技术标准》和《应急启用与恢复工作指南》，为设计、建设和运营提供技术依据。

（3）优化绩效评估与动态管理：建立项目后评估制度，重点考核“规划符合度”、“投资效率”、“平急转换效能”。评估结果作为责任单位绩效考核的依据，并用于动态调整和优化项目储备库，形成“规划-实施-反馈-优化”的闭环管理。

## **6.2 创新国土空间保障模式**

突破传统用地保障模式，为“平急两用”设施提供合法、稳定且富有弹性的空间载体，实现“平时”功能与“急时”需求在空间上的有机统一与高效转换。

核心举措之一是实施空间资源的战略性预留与精细化

**的清单管理。**不仅要在国土空间总体规划和控详规中同步落实“平急两用”设施的专项用地与战略性留白空间，更要建立全域“城市可转换空间清单”，将体育场馆、学校、宾馆酒店、公园绿地等大量具备转换潜力的存量公共设施纳入其中，进行台账化管理，为快速应急响应奠定空间基础。

**与之协同的是推行灵活高效的用地保障政策。**对“平急两用”项目用地实行“指标优先、审批从快”的保障机制，并积极探索“先租后让”、“弹性年期出让”等创新供地模式，以有效降低项目初期用地成本，提升社会资本参与的积极性。

**为确保空间保障的实质效能，必须在规划建设源头强化功能融合。**即在规划许可环节，将“平急双态设计方案”作为强制性审查内容，确保各类设施在空间布局、流线组织、结构荷载及设备接口等方面，全面满足应急转换的刚性技术要求，避免出现“有空间、无功能”的窘境。

### **6.3 创新多元化资金与投融资体系**

厘清政府与市场边界，形成财政引导、金融助力、社会资本积极参与的多元化、可持续投融资格局，确保项目“建得成、运得稳”，实现长期可持续发展。

**首先，要精准界定并发挥财政资金的引导与托底作用。**对应急指挥中心、核心物资仓库等公益性强的设施，应以中央预算内投资、超长期特别国债和地方财政资金为主要来源。同时，建议设立“城市韧性发展基金”，专项用于支持

设施的“平急转换”设备更新、数字化运维与常态化应急演练。

其次，要大力创新并拓宽市场化投融资路径。对隔离酒店、物流仓储等具备稳定现金流特征的设施，应积极推广基础设施 REITs 等模式吸引社会资本。地方政府还可结合城市更新，运用容积率奖励、开发权转移等政策工具，激励市场主体主动提供或改造“平急两用”空间。

最为关键的是，要建立清晰稳定的投资回报与风险分担机制。必须制定并公开《“平急两用”设施应急征用与补偿办法》，明确征用条件、程序、补偿标准与资金来源，彻底消除社会资本的后顾之忧。同时，完善“平时”运营收益反哺机制，允许并规范运营方通过市场化经营获取收益，并明确其将部分收益用于设施维护与应急储备的责任，从而形成投入与产出的良性循环。

#### **6.4 强化建设实施与运行治理联动**

为确保“平急两用”公共基础设施实现从高标准建设到高效能运营的无缝衔接，必须建立建设与治理一体化的联动机制，核心在于通过标准控制、经济激励与契约保障，确保设施在全生命周期内均能实现“平时可用、急时顶用”的核心目标。

其一，建立贯穿建设全过程的标准化质量管控体系。推动“平急两用”设施建设标准、技术导则与审查机制的体系化落地，是确保工程实体具备可靠转换能力的根本。关键在于

全面推行“平急双态设计与专项审查制度”，在项目方案设计与施工图审查阶段，设立强制性专项审查环节，对空间转换的可行性、流线组织的合理性、设备系统的冗余备份（如双回路供电、冗余通信接口）及管线预留等关键技术要求进行严格把关，从源头上杜绝因设计缺陷导致的“转换失灵”风险。

其二，完善运营期的可持续经济循环机制。为实现设施的长期良性运营，需构建“平时”运营收益反哺“急时”功能保障的循环机制。明确要求设施运营方建立专用账户，将常态化运营中获得的部分收益，定向用于设施的日常维护、设备周期性更新及应急物资储备，从而减轻政府长期财政负担，并通过经济手段激励运营主体主动维持设施的应急战备状态，有效解决“重建设、轻运维”的普遍难题。

其三，以规范化协议明确权责，稳定社会资本预期。为有效吸引并保障社会资本积极参与，必须制定标准化的《平急两用设施服务协议》。该协议应作为项目投资、建设或运营合同的核心组成部分，明确约定应急状态下的设施启用条件、征用程序、使用期限、补偿标准、成本核算方式及事后恢复与结算规则。通过法律契约形式固化各方权责利，为社会资本提供清晰、稳定的政策预期，是其敢于投入、愿意长期运营的关键保障。

其四，建立建设与运营数据的移交与共享机制。在项目竣工验收阶段，强制要求将包含“平急”转换功能在内的全部

设计图纸、设备参数、操作手册等关键信息，作为竣工档案完整移交至运营单位及市级统一管理平台。此举可确保运营团队精准掌握设施转换的全部技术要点，为后续的日常维护、应急演练和快速转换提供精准的信息支撑，实现从建设到运营的“无缝知识传递”，闭合全周期管理链条。

## 参考文献:

- [1] 李燕, 张垒, 赵星烁. 基于韧性城市理论的“平急两用”公共基础设施国土空间规划应对策略研究[J]. 小城镇建设, 2025, 43(01): 92 - 98.
- [2] 中华人民共和国住房和城乡建设部. 城市综合防灾规划标准: GB/T 51327- 2018[S]. 北京: 中国计划出版社, 2018.
- [3] 王后雄. 城市防灾空间布局与应急管理体系研究[J]. 城市规划, 2015, 39(4): 45 - 52.
- [4] 张小雷. 基于 GIS 的城市综合防灾空间布局研究[J]. 地理科学, 2017, 37(8): 1231 - 1239.
- [5] 中华人民共和国自然资源部. 城乡公共卫生应急空间规划规范(试行): TD/T 1074-2023[S]. 北京: 中国标准出版社, 2023.
- [6] 何青菁. 城市公共服务设施的“平急转换”空间预留策略研究——以武汉市为例[J]. 规划师, 2022, 38(9): 45 - 52.
- [7] 陆玉麒. 城市安全韧性与国土空间规划体系协同研究[J]. 城市发展研究, 2021, 28(6): 17 - 25.
- [8] 吴志强. 基于数字孪生的城市应急空间动态管理体系构建[J]. 城市建筑, 2020, 17(23): 10 - 15.
- [9] 中华人民共和国自然资源部. 平急功能复合的韧性城市规划与土地政策指引[R]. 北京: 自然资源部办公厅, 2024.
- [10] 郭璐宇, 翟国方. 基于时间转换与空间复用的城市基础设施韧性规划模型研究[J]. 城市规划学刊, 2024, 48(2): 33 - 42.



- [11] 王凯. 北京市“平急两用”公共基础设施布局优化研究[J]. 城市规划汇刊, 2022, 44(5): 67 - 74.
- [12] 陈静, 李鹏, 孙晓岚. 城市公园绿地的防灾与应急双重功能研究——以上海市为例[J]. 国际城市规划, 2023, 38(3): 56 - 64.
- [13] 中华人民共和国自然资源部. 国土空间规划“一张图”实施监督信息系统建设技术要求[R]. 北京: 自然资源部办公厅, 2022.
- [14] 王金南, 张军, 孙然. “多规合一”视角下的国土空间信息平台建设与应用[J]. 中国国土资源经济, 2021, 34(6): 3 - 10.
- [15] 李志刚, 胡滨. “一张图”与城市空间治理数字化转型研究[J]. 城市规划学刊, 2023, 47(4): 22 - 31.
- [16] 沈体雁. “三区三线”划定的空间管控逻辑与实施机制研究[J]. 城市发展研究, 2022, 29(5): 1 - 9.
- [17] 周乾. “一张图”系统在国土空间规划审批中的技术集成应用[J]. 规划师, 2023, 39(12): 98 - 105.
- [18] 张尚武. “规建治”一体化的城市空间治理模式探讨[J]. 城市问题, 2022, 41(8): 14 - 22.
- [19] 刘彦随. 空间治理体系现代化与国土空间规划转型[J]. 地理科学进展, 2020, 39(12): 1911 - 1922.
- [20] 陈露. 城市“平急两用”公共基础设施复合布局研究——以广州为例[J]. 规划师, 2021, 37(11): 89 - 96.
- [21] 郝兵. 数字化背景下的城市规划实施监管体系创新研究[J]. 现代城市研究, 2022, 28(10): 44 - 51.

- [22] 上海市规划和自然资源局. 上海市综合防灾减灾安全韧性分区建设导则[R]. 上海: 上海市规划和自然资源局, 2023.
- [23] 广东省自然资源厅. 广东省“平急两用”公共基础设施建设设计指引(试行)[R]. 广州: 广东省自然资源厅, 2024.
- [24] 中华人民共和国自然资源部. 国土空间规划体检评估工作指引(试行)[R]. 北京: 中国标准出版社, 2023.
- [25] Bertalanffy L von. General System Theory: Foundations, Development, Applications[M]. New York: George Braziller, 1968.
- [26] Berke P, Godschalk D. Searching for the Good Plan: A Meta-Analysis of Plan Quality Studies[J]. Journal of Planning Literature, 2009, 23(3): 227–240.
- [27] Ansell C, Gash A. Collaborative Governance in Theory and Practice[J]. Journal of Public Administration Research and Theory, 2008, 18(4): 543–571.
- [28] Pressman J L, Wildavsky A. Implementation: How Great Expectations in Washington Are Dashed in Oakland[M]. Berkeley: University of California Press, 1973.

## 附表

**附表 1 “平急两用”公共基础设施专项规划编制主要内容与其他规划衔接**

| 衔接规划类型/平急两用专项规划内容 | 设施体系构建                 | 需求评估                          | 规划目标                                      | 指标体系                     | 配置标准与设施布局           | 转换部署与实施管理 |
|-------------------|------------------------|-------------------------------|-------------------------------------------|--------------------------|---------------------|-----------|
| 国民经济和社会发展规划       | 城市韧性建设任务；<br>公共服务资源体系  | 参考公共服务能力与安全保障指标约束             | 核心输入：<br>• 安全韧性发展目标；<br>• 城市运行安全底线目标      | 约束性指标传导：<br>• 应急能力建设相关指标 | 公共服务均衡城乡协同布局要求      | —         |
| 国土空间总体规划          | 市一区一社区设施结构；开放空间分类；防灾设施 | 双评估/双评价结果；<br>预测人口，包括总人口和分区人口 | 核心输入：<br>• 城市安全格局；<br>• 防灾分区；<br>• 整体韧性格局 | 分区设施规模；<br>韧性城市指标传导      | 公共服务设施布局；<br>防灾安全布局 | —         |
| 国土空间详细规划          | —                      | —                             | —                                         | 参考单元控制指标                 | —                   | —         |

|        |                |                                                 |                                                                                 |   |                                                             |                                                        |                                       |
|--------|----------------|-------------------------------------------------|---------------------------------------------------------------------------------|---|-------------------------------------------------------------|--------------------------------------------------------|---------------------------------------|
|        |                |                                                 |                                                                                 |   | • 每万人应急设施面积                                                 |                                                        |                                       |
| 其他专项规划 | 综合<br>防灾<br>规划 | 核心衔接：<br>• 应急设施体系结构<br>• 避难/指挥/救援体系             | 核心输入：<br>• 避险容量测算<br>• 灾种峰值疏散需求<br>• 重点灾害及其影响范围和人数                              | — | 指标协同：<br>• 人均避难面积<br>• 疏散时间指标                               | 核心输入：<br>• 灾害风险地图<br>• 风险等级区划<br>• 避让建设区管控             | 流程协同：<br>• 启动等级<br>• 转移路线<br>• 场所启用流程 |
|        | 公共<br>卫生<br>规划 | 核心衔接：<br>• 医疗救治体系<br>• 哨点医院/发热门诊/定点医院/疾控中心等相关设施 | 核心输入：区域医疗中心、综合医院（含中医医院）、社区卫生服务中心（站）、乡镇卫生院等医疗卫生设施，依据本市医疗卫生专项规划，评估医疗卫生服务设施在总量和均好性 | — | 指标协同：<br>• 哨点医院覆盖率<br>• ICU 床数量及占比<br>• 发热门诊布点<br>• 所有医院床位数 | 输入和协同内容：<br>• 15 分钟医疗圈<br>• 公共服务设施空间分布<br>• 疫情期间隔离场所布局 | 流程协同：<br>• 平急转换流程<br>• 普通→隔离转换        |

|        |                                                                                    |                                                                        |                |                                                                                                                         |                                                                                    |                                                                                     |  |
|--------|------------------------------------------------------------------------------------|------------------------------------------------------------------------|----------------|-------------------------------------------------------------------------------------------------------------------------|------------------------------------------------------------------------------------|-------------------------------------------------------------------------------------|--|
|        |                                                                                    |                                                                        | 方面的缺口，拟定“平时”需求 |                                                                                                                         |                                                                                    |                                                                                     |  |
| 文化旅游规划 | 核心衔接： <ul style="list-style-type: none"> <li>• 酒店体系</li> <li>• 民宿体系</li> </ul>     | 核心输入：城市旅游居住设施的发展目标和布局，分析民宿、酒店、度假村、旅居集散基地等设施的拟建资源，评估按需筹建、改造旅游居住设施的数量、布局 | —              | 指标协同： <ul style="list-style-type: none"> <li>• 酒店房间数</li> <li>• 酒店数据（总量和分区县）</li> <li>• 民宿房间数（总量和分区县）</li> </ul>        | 布局标准： <ul style="list-style-type: none"> <li>• 酒店分布</li> <li>• 民宿分布</li> </ul>     | —                                                                                   |  |
| 物流交通规划 | 核心衔接： <ul style="list-style-type: none"> <li>• 物流节点体系</li> <li>• 城郊仓储枢纽</li> </ul> | 核心输入：依据本市仓储物流专项规划，分析物流模式、发展趋势，评估应急供应链的韧性和布局                            | —              | 能力指标： <ul style="list-style-type: none"> <li>• 物资周转天数</li> <li>• 仓储设施建筑面积</li> <li>• 仓库存储量</li> <li>• 通道通行能力</li> </ul> | 布局标准： <ul style="list-style-type: none"> <li>• 高速出口选址</li> <li>• 物流廊道布局</li> </ul> | 机制建立： <ul style="list-style-type: none"> <li>• 物资调配优先级</li> <li>• 分拨路线规划</li> </ul> |  |

|  |                |                                    |   |   |                                                |                                          |   |
|--|----------------|------------------------------------|---|---|------------------------------------------------|------------------------------------------|---|
|  | 城市<br>更新<br>规划 | —                                  | — | — | —                                              | 布局标准：<br>• 嵌入式更新<br>标准<br>• 微型社区设<br>施布局 | — |
|  | 地下<br>空间<br>规划 | 核心衔接：<br>• 地下避难体系<br>• 储备/指挥中<br>心 | — | — | 贡献指标：<br>• 地下避难容量<br>• 物资储备能力<br>• 人防工程转换<br>率 | 布局标准：<br>• 节点布局要<br>求                    | — |

附表 2 其他各类规划增加“平急两用”公共基础设施规划相衔接内容的建议

| 协同规划类型   | 建议增补或强化的核心内容                                                   | 强化衔接的预期效益                                           |
|----------|----------------------------------------------------------------|-----------------------------------------------------|
| 国土空间总体规划 | 1. 明确安全韧性网络：在总体空间结构中明确提出包含防护格局、救援走廊、安置节点的安全网络。                 | 为“平急两用”专项规划提供最顶层的空间战略依据和弹性用地保障，确保应急设施布局与城市长远发展结构一致。 |
|          | 2. 预留“急时”弹性空间：在城市重点地区（如更新区、功能区）的用地布局中，明确预留用于应急转换的弹性用地或战略留白。    |                                                     |
|          | 3. 纳入“平急两用”管控要素：在总体规划的强制性内容或指引性内容中，增加对“平急两用”设施体系构建和空间落位的原则性要求。 |                                                     |
| 详细规划     | 1. 传导量化指标：将专项规划分解的设施规模、服务半径等指标落实到具体地块。                         | 实现“平急两用”设施从宏观布局到微观落地，通过法定图则确保设施在建设和使用阶段均能满足平急转换需求。  |

|        |                                                                                                                                                                |                                        |
|--------|----------------------------------------------------------------------------------------------------------------------------------------------------------------|----------------------------------------|
|        | <p>2. 划定控制线：细化落实应急通道红线、重要设施安全防护范围等。</p> <p>3. 建立“可转换空间清单”：在控规中明确列出各类公共服务设施、绿地、留白用地等可作为“平急两用”的空间及其转换要求。</p> <p>4. 纳入规划许可条件：要求相关建设项目在报批时提供“平急双态设计”方案和功能转换条款。</p> |                                        |
| 综合防灾规划 | <p>1. 统一工程技术标准：与“平急两用”设施协同，统一应急通道、生命线系统的设防标准与标识系统。</p> <p>2. 深化协同响应机制：在应急预案中明确纳入“平急两用”设施的启用流程、管理主体和协作关系。</p>                                                   | 形成标准统一、响应联动的防灾减灾体系，提升整体运作效率。           |
| 公共卫生规划 | <p>1. 预留应急转换空间：在新建或改扩建医疗设施时，强制要求预留一定比例的可转换病房（如 20%）、ICU 床位（如 30%）及设备接口。</p> <p>2. 制定动态调配预案：细化各级医疗机构在应急状态下的资源（床位、人员、设备）统一调配机制与时限要求。</p>                         | 显著增强医疗系统的弹性与扩展能力，确保在重大公共卫生事件中快速扩容收治能力。 |



|        |                                                        |                                       |
|--------|--------------------------------------------------------|---------------------------------------|
| 文旅规划   | 1. 明确“平急两用”导向：在酒店项目审批或星级评定中，增加对其应急转换潜力的评估要求。           | 系统化、标准化地扩充应急隔离资源，避免临时征用的混乱。           |
|        | 2. 制定改造计划：建立现有酒店设施的“平急两用”改造清单和分期实施计划。                  |                                       |
| 城市更新规划 | 1. 强制预留应急空间：在更新规划导则中明确规定各类更新项目必须配套建设或预留特定规模和标准的应急空间。   | 将应急能力建设有机嵌入城市存量发展过程，以更新为契机系统性提升建成区韧性。 |
|        | 2. 鼓励功能复合设计：提倡在更新项目中优先采用利于平急转换的建筑设计 and 空间布局。          |                                       |
| 地下空间规划 | 1. 强化互联互通：在规划中重点落实关键地下应急空间之间的连通性，并确保其结构与通道满足应急通行和运输要求。 | 最大化发挥地下空间的战备效益和防护能力，构建地上地下一体化的应急保障系统。 |
|        | 2. 设置专用应急功能区：在大型地下综合体规划中，强制要求划定并设计专用的应急指挥、医疗、物资储备区域。   |                                       |

**附表 3 政府工作建议表**

| 工作类别     | 序号  | 重点工作任务                                      | 牵头部门              | 完成时限 |
|----------|-----|---------------------------------------------|-------------------|------|
| 1. 完善制度类 | 1.1 | 推动“平急两用”专项规划法定化，明确其在国土空间规划体系中的地位与编制要求。      | 自然资源部门、住房城乡建设部门   | 中长期  |
|          | 1.2 | 成立市级“平急两用”建设工作领导小组及常设办公室，建立跨部门协同推进机制。       | 市政府办公厅            | 近期   |
|          | 1.3 | 制定并推行“平急两用”项目联合审查与并联审批制度，建立审批绿色通道。          | 发展改革部门、住房城乡建设部门   | 近期   |
|          | 1.4 | 构建“谋划库-储备库-建设库”三级项目清单动态管理体系，实现全流程信息化管理。     | 发展改革部门、住房城乡建设部门   | 中期   |
|          | 1.5 | 出台《“平急两用”设施应急征用与补偿办法》，稳定社会资本预期。             | 司法部门、财政部门、应急管理部门  | 中期   |
| 2. 试点示范类 | 2.1 | 遴选一批基础好的区县或项目，开展“平急两用”综合试点。                 | 住房城乡建设部门、发展改革部门   | 近期启动 |
|          | 2.2 | 针对不同类型设施（如酒店、体育场馆、物流仓库），开展“平急双态设计”与标准化转换试点。 | 住房城乡建设部门、相关行业主管部门 | 中期   |

|          |     |                                           |                     |      |
|----------|-----|-------------------------------------------|---------------------|------|
|          | 2.3 | 推动《“平急两用”设施设计导则》和《转换技术标准》在试点项目中先行先试与应用验证。 | 住房城乡建设部门、市场监督管理部门   | 中期   |
|          | 2.4 | 探索“平急两用”与城市更新、新区建设融合的投融资与实施模式创新试点。        | 发展改革部门、住房城乡建设部门     | 中长期  |
| 3. 要素保障类 | 3.1 | 在国土空间规划中落实“平急两用”专项用地与战略性留白空间。             | 自然资源部门              | 中长期  |
|          | 3.2 | 建立全域“城市可转换空间清单”，对存量设施进行台账化管理与潜力评估。        | 自然资源部门、各设施主管部门      | 中期   |
|          | 3.3 | 推行“先租后让”、“弹性年期出让”等创新型供地模式，降低项目用地成本。       | 自然资源部门              | 持续推行 |
|          | 3.4 | 在规划许可中强制审查“平急双态设计方案”，确保空间与功能的应急兼容性。       | 自然资源部门、住房城乡建设部门     | 近期推行 |
| 4. 资金支持类 | 4.1 | 设立“城市韧性发展基金”，支持设施转换设备更新、数字化运维与演练。         | 财政部门、发展改革部门         | 中期   |
|          | 4.2 | 积极争取超长期特别国债、中央预算内投资等资金，支持公益性设施建设。         | 发展改革部门、财政部门         | 持续争取 |
|          | 4.3 | 推广基础设施REITs等模式，吸引社会资本参与经营性设施建设运营。         | 发展改革部门、证监会（协调）、地方政府 | 持续推动 |

|          |     |                                        |                      |      |
|----------|-----|----------------------------------------|----------------------|------|
|          | 4.4 | 完善“平时”运营收益反哺机制，明确收益用于维护与应急储备的要求。       | 财政部门、各行业主管部门         | 中期   |
| 5. 能力建设类 | 5.1 | 制定并发布《“平急两用”设施设计导则》、《平急转换技术标准》等系列技术文件。 | 住房城乡建设部门、市场监督管理部门    | 近期完成 |
|          | 5.2 | 建立“平急双态设计与专项审查”制度，纳入工程建设项目审批流程。        | 住房城乡建设部门             | 近期推行 |
|          | 5.3 | 建立覆盖规划、建设、运营的全周期评估体系，并将结果与预算、考核硬性挂钩。   | 住房城乡建设部门、发展改革部门、财政部门 | 中期建立 |
|          | 5.4 | 建设城市级“平急两用”数字孪生平台，推动设施全面接入与数据驱动治理。     | 住房城乡建设部门、政务服务数据管理部门  | 中长期  |

## 附件

附件 1 “平急两用”公共基础设施专项规划推荐指标一览表

| 维度       | 序号 | 指标项                                         | 指标内涵                                                 |
|----------|----|---------------------------------------------|------------------------------------------------------|
| 应急<br>隔离 | 1  | “平急两用”旅游居住设施隔离房间数（间）                        | “平急两用”旅游居住设施中可用于应急隔离、隔离医学观察的房间数量。                    |
|          | 2  | “平急两用”旅游居住设施可承接隔离人员规模（人）                    | “平急两用”旅游居住设施中可承接应急隔离、隔离医学观察人员的最大人数规模。                |
|          | 3  | 可临时启用的城市大型公共建筑面积（万平方米）                      | 医院内外会议中心、体育馆等大型公共建筑能够快速响应及转换为临时隔离设施的建筑面积。            |
|          | 4  | 可临时启用的城市大型公共建筑可承接最大人员规模（万人）                 | 医院内外会议中心、体育馆等大型公共建筑完成平急转换后可承接最大人员规模（万人）。             |
| 应急<br>医疗 | 5  | 承担主要救治任务的二级及以上医院重症监护病床（ICU）床位数占医院总床位数的比例（%） | 在城市“急时”承担主要救治任务的医院中，重症监护病床（ICU）占医院总床位数的比例。           |
|          | 6  | 疫情监测哨点医院覆盖率（%）                              | 具有信息收集与报告、初步原因性疾病预警功能的医疗应急服务机构覆盖建设用地面积占辖区建设用地总面积的比例。 |
|          | 7  | 城市二级及以上医院覆盖率（%）                             | 医区内二级及以上医院 4 公里（公共 15 分钟车程）服务半径覆盖面的建设面积占辖区建设用地面积的比例。 |
|          | 8  | 具备快速审查发热门诊条件的二级及以上医院占比（%）                   | 医区内具备快速审查发热门诊条件的二级及以上医院数量占辖区内二级及以上医院数量的比例。           |

|      |    |                              |                                                          |
|------|----|------------------------------|----------------------------------------------------------|
|      | 9  | 镇卫生院和社区卫生服务中心覆盖发热门诊（诊室）比例（%） | 医区内设置发热门诊（诊室）的镇卫生院和社区卫生服务中心数量占镇卫生院和社区卫生服务中心数量的比例。        |
|      | 10 | 每千常住人口医疗卫生机构床位数（张）           | 医区内医疗卫生机构床位数/辖区内常住人口数×1000。                              |
| 物资保障 | 11 | “平急两用”城市大仓基地用地面积（亩）          | 医区内建设“平急两用”城市大仓基地的用地规模。                                  |
|      | 12 | “平急两用”城市大仓基地应急仓储面积（万平方米）     | 医区内“平急两用”城市大仓基地中可用于储存和保障重要生活物资、救援设备、救灾救援药品、医疗用品等物资的建筑面积。 |
|      | 13 | 动用粮食储备规模（万吨）                 | 医区内粮食储备规划为应对可能的重大灾害、疫情或市场波动等情况而预先储存的粮食总量。                |
|      | 14 | 生活物资多样化周转场地数量（个）             | 医区内可用于应急状态下快速调拨生活物资的商贸流通类、农产品交易类生活物资周转场所数量。              |
|      | 15 | 生活物资应急投放网点建设面积（平方米）          | 医区内用于应急状态下生活必需品应急投放、投放点覆盖面的建设用地面积。                       |
|      | 16 | 生活物资临时转运投放数量（个）              | 医区内“急时”用于生活物资临时储备、中转和投放的场所数量。                            |

资料来源：《“平急两用”公共基础设施专项规划编制指南》（征求意见稿）

## 附件 2

### 1. 北京

#### (1)《北京市韧性城市空间专项规划(2022-2035 年)》

北京在全国率先“平急两用”纳入韧性城市顶层设计，形成了以分层分级布局(“1+3+5”格局)、设施复合利用(医疗、交通、教育、文旅等公共空间平急转换)、分布式组团保障(组团自给互助)、战略留白与政策工具箱(用地、资金、标准)以及数字化管理平台为支撑的完整体系，并在门头沟灾后重建中开展全灾种、全场景的实战探索，构建了“规划—建设—标准—演练”闭环，整体经验可总结为：空间分层、设施复合、政策保障、数字支撑、灾后试点，为超大城市安全韧性提升提供了可推广模式。

为深入推进韧性城市规划建设，加强空间领域的顶层设计和规划引领，北京市编制了《北京市韧性城市空间专项规划(2022 年-2035 年)》。

##### 1) 制定韧性发展目标

规划以保障首都安全为核心，构建安全可靠、灵活转换、快速恢复、有机组织、适应未来的首都韧性城市空间治理体。规划 2025 年初步形成韧性空间框架，2035 年建成兼具维持力与恢复力的韧性格局，2050 年建成国际一流韧性城市典范。

## 2) 构建韧性城市空间格局

以极限思维为导向，依托市域、圈层、韧性城市组团、韧性街镇单元、韧性社村生活圈等空间单元，构建“集中式+分布式”的韧性城市空间布局结构。一是，立足京津冀协同发展，统筹生态网络、防灾网络和生命线系统，构建“三环八廊多支点”的市域韧性城市支撑体系。二是，结合“一核一主一副，两轴多点一区”北京城市空间结构，提出差异化圈层韧性要点，引导区域韧性统筹提升。三是，结合各区资源禀赋条件和功能定位，拟合供水、排水、电力、燃气、物资供应等生命线保障系统分区，建立具备基本城市运行能力的分布式韧性城市组团。四是，依托韧性城市组团，以街道(乡镇)行政边界为基础细分单元，明确单元类型与分区施策重点，形成具有风险治理能力的韧性街镇单元。五是，结合15分钟社区生活圈，按照1000-1500米范围构建以社区、乡村为主体的韧性基本空间组织单元，形成邻里自治互助的韧性社村生活圈。

## 3) 精准提升城市保障能力

一是加强应对极端情景的战略储备。提升本地水源战略地储备能力，加强本地电源供应保障韧性。二是推动生命线系统的分布式建设。完善多源多向的水源保障体系，强化电力供应体系韧性，提升重要交通廊道韧性水平，多通道保障



重要物资的进出畅通，建设生命线工程高韧性节点。三是实现区域协同的韧性互助体系。强化应急条件下韧性城市组团、韧性街镇单元间的交通联系，强化市政基础设施互联互通与应急能力建设，着力提升应急物资的储备与调运能力。四是统筹拓展超大城市“平急两用”功能内涵。推动“平急两用”公共基础设施战略性布局，强化战略留白用地的应急转化功能，深度提升防疫设施平稳转化条件，持续探索韧性视角下多元设施平稳转换。五是以数字孪生强化风险感知应对能力。通过各级各类智慧手段，持续加深不同类型灾害认识，多方式提升应急通信保障能力，加强跨部门、跨地域的监测预警信息共享和会商研判，通过新技术新手段提升韧性应对能力。六是强化社会共治的多元化治理能力。建立高度敏感、全域覆盖的传染病监测筛查网络，加强“家庭-社区-组团”的物资储备能力建设，夯实基层应急动员机制。

#### 4) 案例借鉴要点：

一是空间预留。将战略留白用地作为“平急两用”的重要战略储备空间，推动布局优化、实地留白，强化市政基础设施接入条件，为城市应对危机提供缓冲空间。

二是设施融合。推动交通、医疗、公园等公共空间平急功能复合利用。例如，医疗机构预留扩展空间，实现“平疫转换”；交通枢纽、公园绿地、学校操场预设应急避难与物资调配功能；浅山区步道改造为防火逃生通道等。

三是分布式韧性。构建韧性城市组团，按人口与功能划分组团，确保各组团具备供水、供电、物资储备等基础运行能力，实现灾时自给自足与互助支援。

四是基层单元。构建韧性涉村生活圈，以社区/村为单元（半径 1000-1500 米），整合超市、菜站、药店等设施，建立“家庭-社区-组团”三级物资储备体系（每级保障 3 天需求）。

五是数字平台。建立城市风险“一网统管”平台，部署灾害感知终端，强化预警精准度与应急响应效率。

## （2）北京市人民政府办公厅印发《关于推进本市“平急两用”公共基础设施建设总体实施方案》的通知

### 1) 总体要求

以“平急两用”公共基础设施建设为重要抓手，贯通应用场景、建设标准、政策体系、实战演练等各个环节，着力补齐隔离安置房源、医疗卫生服务、应急物资转运、防灾避险设施等短板，打造“功能可转换、空间可承载、发展可持续、经济有支撑、安全有保障”的“平急两用”体系，持续增强城市安全韧性能力。

构建全市“1+3+5”的“平急两用”格局，“1”即平谷区创建国家“平急两用”发展先行区，承担中心城区、城市副中心及本区的隔离和安置任务；“3”即门头沟区、房山区、

昌平区结合“23·7”灾后恢复重建落实“平急两用”工作要求；“5”即顺义区、大兴区、怀柔区、密云区、延庆区承担本区隔离和防灾避险人员安置任务。

到 2025 年，建设改造一批具备紧急集中安置条件、具有疫情隔离功能的旅游居住设施，归集纳管的房源不少于 2 万间。启动建设一批具备快速中转能力的城郊大仓基地，逐步完善提升一批医疗卫生服务设施；结合“23·7”灾后恢复重建，建成一批“平急两用”的防灾避险设施，初步形成相关标准、资金、用地等政策保障体系，具备较为成熟的应急管理处置能力。到 2027 年，归集纳管的旅游居住设施房源约 4.4 万间，城郊大仓基地布局建设稳步推进，物流体系平急转换和应急物资保障能力进一步匹配应急需求，应对全场景、超预期风险的综合能力稳步提升，城市健康治理现代化能力显著提高，安全韧性水平进一步增强。

## 2) 平急结合：日常与应急功能转换体系

从功能设计原则上，设施需同时满足“平时”服务功能（旅游、物流、医疗）和“急时”应急功能（隔离、物资保障、救治）双重属性；严格遵循“三区两通道”规范（隔离区/缓冲区/工作区，人员/物资通道），确保快速切换。在实施机制方面，建立“平急转换预案”，明确启用条件、流程和责任主体；搭建智能信息管理平台，实现“平时监测演练，急

时指挥调度”。

表 2 核心设施分类及量化目标

| 设施类型        | 平时功能        | 急时功能          | 量化目标<br>(2025 年) |
|-------------|-------------|---------------|------------------|
| 旅游居住设施      | 酒店、乡村<br>民宿 | 紧急隔离安置<br>点   | 房源≥2 万间          |
| 城郊大仓基地      | 生活物资中<br>转  | 应急物资调配<br>站   | 升级马驹桥等物<br>流基地   |
| 医疗应急服<br>务点 | 日常诊疗        | 疫情监测/重<br>症救治 | 乡镇全覆盖医疗<br>点     |

3) 平灾结合：防灾功能嵌入公共设施

在灾害场景覆盖上，重点防御洪灾、火灾等自然灾害，山区设施增设地质监测和通讯保障；山区交通采用“穿山越岭”设计，构建环形生命线通道，确保灾时多路通达。在设施改造要点方面，学校、体育场馆嵌入防灾避险功能，预留应急物资储备空间；乡村布局“应急安全小屋”，集成用电、供水、医疗救助功能。灾后重建区（门头沟、房山、昌平）优先建设综合性防灾设施，融合气象监测与空中救援能力。

4) 平会结合：大型活动场所应急兼容

在设施复用设计方面，高速公路服务区（如金海湖）增设地下空间，“平时”为旅游集散中心，“急时”转为物资储备站；展览馆、体育馆预留疫情隔离改造接口，通过流线优化实现功能兼容。通过运营支撑经济可持续性，例如，加强周边绿化景观和商业配套，“以平养急”提升盈利能力。

## 5) 实施机制保障

建立“政策工具箱”(用地+财政+金融),吸引民间资本参与运营。在土地保障方面,纳入国土空间规划,优先安排用地指标,推行“净地出让”简化流程;在资金支持方面,组合运用专项债、中央预算内投资、社会资本(如PPP模式),制定应急征用补偿政策。

将设施数据融入城市智慧管理平台,强化沙盘演练与实战指挥衔接。搭建智能信息平台,集成“一单(资源清单)、一图(分布图)、一表(流程表)”,实现平急转换全程可控。

打破部门壁垒,以任务清单压实责任,强化跨部门协同。在责任捆绑机制方面,每项任务明确主责单位(如文旅局管旅游设施、交通委管服务区)和协作部门(规自委、卫健委等);建立专班推进机制,市级专班统筹项目论证与动态更新,纳入“一单”储备库优先实施。

## 6) 案例借鉴要点:

一是多场景融合导向。统筹“平时”服务功能(旅游、物流、休闲)与“急时”应急功能(防疫、防洪、防灾),避免设施闲置。规划需预设多场景转换路径,明确功能嵌入标准。

二是空间分层布局策略。构建“1+3+5”梯度格局(1个先行区+3个灾后重建区+5个基础保障区),按区域禀赋分级承担任务。根据地理区位、风险等级划分责任分区,实现资

源高效调配。

三是设施多功能改造。优先利用存量设施改造，降低新建成本；制定差异化建设标准（如乡村民宿 vs 城市酒店）。

四是韧性支撑体系建设。聚焦关键短板（如物资中转、山区通讯），通过基础设施“平急双能”提升系统韧性。

五是分阶段量化目标。明确 2025 年（房源 2 万间+仓储 470 万吨）、2027 年（房源 4.4 万间+物流能力提升）里程碑节点。设定可考核的阶段性指标，确保规划落地。

#### （4）北京市发改委《积极稳步推进”平急两用“公共基础设施建设 提升超大城市安全韧性》

“平急两用”设施建设是北京市持续稳增长、扩内需、兴产业、促增收的重要抓手。要坚持政府引导、市场主导原则，通过存量挖潜、增量织补、远近结合，从明确项目建设时序、建设一批功能设施、提升城市韧性能力、搭建信息化平台提升平急转换能力、加强要素保障等六方面入手，统筹推进本市“平急两用”公共基础设施建设，确保“平时用得着，急时用得上”，为全国开展此项工作提供北京经验和样板。

##### 1) 统筹推进各区各类建设进度

一是规划引领。衔接韧性城市、应急体系、公共卫生、物流体系等专项规划，统筹城市更新、乡村振兴、文旅物流等任务。二是分步实施。近期聚焦先行区建设，形成可复制

的政策、标准和模式，中长期结合灾后重建，按条件成熟度逐步推进。三是功能集成。综合设定应急标准，通过预留接口、设施组合实现“一场多用”。

## 2) 建设应对多场景的设施体系

一是建设一批旅游隔离酒店。试点酒店民宿改造，解决用地与收益问题；发展应急主题博物馆、体验馆等“黑色旅游”。二是储备一批单体大型场馆。改造体育场馆、会展中心等大空间，实现“平时多元业态整合，急时物资存储切换”。三是升级一批医疗应急服务点。将方舱设施升级为医疗点，配备除颤仪、呼吸机等设备，探索临时医疗点与互联网医疗。四是打造一批乡村休闲综合体。盘活闲置农宅和集体用地，打造古村落、红色旅游村等特色项目，引入高品质服务设施。

## 3) 全方位提升城市韧性水平

一是拓展空间韧性。统筹广场、绿地、公园等作为应急避难所，确保 1 公里紧急避险覆盖，战略物资储备满足 60% 人口 3-5 天需求。二是强化工程韧性。提升生命线工程抗灾能力，在高速公路服务区布局防灾避险综合体，建设乡村“应急安全小屋”。三是提升管理韧性。成立市级专班，制定职责清单；加快制定平战、平灾设施转换标准，纳入项目审查重点。四是培育社会韧性。到 2025 年应急志愿者达常住人口 1%；共建应急体验馆，加强公众实景演练。

## 4) 搭建信息化高效管理平台

一是，推进管理方式现代化升级。融合人工智能、物联网等技术，构建覆盖安全生产、自然灾害等业务的智能信息管理系统。二是，加强应急人才队伍储备和调用。建立分类梯次人才库，落实“人员在册、能力达标、战时在岗”；推动基层救援队伍“一队多能”。

#### 5) 不断提升平急转换实战能力

一是强化演练评估。完善年度应急演练制度，提高专业救援能力，夯实基层应急职能。二是加强科研支撑。鼓励企业、高校研发巨灾推演场景，联动国家应急管理大学建设科研基地。

#### 6) 创新要素保障相关政策

一是创新土地政策。探索“点状征收集体用地+点状供地”模式，满足乡村旅游和乡村振兴用地需求。二是丰富融资工具。支持中长期贷款、基础设施 REITs；设立专项补助资金，降低市场主体成本。三是加强政府资金支持。统筹中央预算内投资、地方专项债等，对公益性设施给予补贴。

### (5) 北京市规划和自然资源委员会《公共服务设施嵌入“平急两用”功能设计指南》

指南重点针对北京市域内“平急两用”中小学校、体育馆、展览馆三类设施在灾害发生时用于受灾人员隔离观察、临时安置等需求的规划设计。



通用设计要求适用于所有“平急两用”公共服务设施(中小学校、展览馆、体育馆),重点关注应急场景分类、选址、风险评估和转换机制。中小学校需兼顾日常教学和应急功能,展览馆需支持大型活动与应急安置,体育馆需支持赛事与应急避难,区分基础级(防灾)和防疫级(疫情隔离)两类要求。

表 3 中小学校、展览馆、体育馆要求整理

|       |       | 中小学校                                                                                                                                                   | 展览馆                                                                                                                                                                       | 体育馆                                                                                                              |
|-------|-------|--------------------------------------------------------------------------------------------------------------------------------------------------------|---------------------------------------------------------------------------------------------------------------------------------------------------------------------------|------------------------------------------------------------------------------------------------------------------|
| 基础级要求 | 总平面设计 | <p>至少两个出入口通向市政道路,操场直通道路。</p> <p>道路设计:双车道 <math>\geq 6\text{m}</math>, 单车道 <math>\geq 3.5\text{m}</math>, 满足救援车辆通行。</p> <p>流线组织:避免平时师生与应急时避难人员流线交叉。</p> | <p>交通便利,室外场地 <math>\geq</math> 展厅面积 50%, 满足集散要求 (<math>0.20 \text{ m}^2/\text{人}</math>)。</p> <p>道路:双车道 <math>\geq 7\text{m}</math>, 单车道 <math>\geq 4\text{m}</math>。</p> | <p>室外场地预留临时用房空间,急救车专用车位临近出入口。</p> <p>流线:确保避难人员、工作人员、物资流线独立。</p>                                                  |
|       | 建筑设计  | <p>优先使用操场、体育馆等大空间作为应急避难场所。</p> <p>材料:防水、防潮、易清洁材质(如不吸附污物)。</p> <p>设施:预留无障碍通道、应急设备接口。</p>                                                                | <p>多功能空间设计,便于快速转换避难场所。</p> <p>材料:地面易清洁、防水防潮。</p> <p>设施:预留特殊群体(老人、残疾人)安置空间。</p>                                                                                            | <p>室内地面标高 <math>\geq 20</math> 年一遇洪水位 + <math>0.3\text{m}</math> 安全超高。</p> <p>材料:防水防潮易消毒。</p> <p>设施:卫生设施数量符合</p> |

|       |       | 中小学校                                                                                                                                                           | 展览馆                                                                                                                                     | 体育馆                                                                                                     |
|-------|-------|----------------------------------------------------------------------------------------------------------------------------------------------------------------|-----------------------------------------------------------------------------------------------------------------------------------------|---------------------------------------------------------------------------------------------------------|
|       |       |                                                                                                                                                                |                                                                                                                                         | 避难标准。                                                                                                   |
|       | 结构设计  | 多道抗震防线，抗震设防烈度提高一度。                                                                                                                                             | 优化抗震、抗风设计（GB 55001 标准），考虑复合灾害。                                                                                                          | 多道抗震防线（重点设防类），基本风压按 100 年一遇设计。                                                                          |
|       | 机电设计  | <p>给排水：双水源保障，应急储水（饮用水 3L/人·日，生活水 10L/人·日）。</p> <p>通风与空调：满足新风需求（GB 50736 标准），供暖确保冬季室内 <math>\geq 18^{\circ}\text{C}</math>。</p> <p>电气与智能化：应急供电、照明、通信系统预留接口。</p> | <p>给排水：应急储水（3 天用量），污水集水池容积 <math>\geq 3</math> 天排水量 1.25 倍。</p> <p>通风与空调：自然或机械通风，新风量符合 GB 51143。</p> <p>电气与智能化：预留自备电源接口，设置广播系统分区控制。</p> | <p>给排水：应急储水（3 天用量），热水系统热源备用（电热）。</p> <p>通风与空调：供暖热源备用（电热），新风防护灾难影响。</p> <p>电气与智能化：供电满足一级负荷，设置应急通信设备。</p> |
| 防疫级要求 | 总平面设计 | 严格分区（“三区两通道”：隔离区、工作准备区、缓冲区），避免流线交叉。急救车专用停车位临近出入口。                                                                                                              | 分区明确（清洁区与污染区），医患流线分离，急救车专用场地。室外预留临时医疗设施空间。                                                                                              | 与周边建筑间距 $\geq 30\text{m}$ ，分清洁区与污染区，污物运输专用通道。                                                           |
|       | 建筑设计  | 减少使用学生密集空间，优先室外或易消杀区域。                                                                                                                                         | 实现“三区两通道”，大跨度无柱空间便于布置隔离单元。                                                                                                              | 严格“三区两通道”，通道宽度满足病床                                                                                      |

|  |      | 中小学校                                                                                                   | 展览馆                                                                                                                               | 体育馆                                                                                                                             |
|--|------|--------------------------------------------------------------------------------------------------------|-----------------------------------------------------------------------------------------------------------------------------------|---------------------------------------------------------------------------------------------------------------------------------|
|  |      | <p>增设污洗间、垃圾暂存间等污染区设施。</p> <p>改造要求：按 GB 50849 标准，如病床区设于宿舍或教室。</p>                                       | 元。地面荷载预留医疗设备，材料耐腐蚀易消杀。                                                                                                            | <p>转运。</p> <p>医 护 与 患 者 卫 生 间 分 设。</p>                                                                                          |
|  | 结构设计 | 按“平时教学”和“疫时隔离”双场景包络设计。                                                                                 | 考虑人员密集使用对结构的影响（如隔墙增加荷载）。                                                                                                          | 抗震措施强化（如楼梯间加固），混凝土抗渗等级 $\geq$ P8。                                                                                               |
|  | 机电设计 | <p>给排水：分区独立系统，污水消毒处理。</p> <p>通风与空调：污染区采用直流式全新风系统，避免回风交叉感染。</p> <p>电气与智能化：应急供电强化，配电按非管控区、缓冲区、管控区分设。</p> | <p>给排水：污染区独立排水系统，全密闭敷设，污水处理强化消毒。</p> <p>通风与空调：清洁区与污染区分设系统，污染区排风消毒后高空排放。</p> <p>电气与智能化：供电满足一级负荷，电缆燃烧性能 <math>\geq</math> B1 级。</p> | <p>给排水：污染区给排水独立，生活热水温度 <math>\geq 60^{\circ}\text{C}</math> 或消毒。</p> <p>通风与空调：缓冲区气流控制。</p> <p>电气与智能化：应急场所强化等电位联结，预留照明及插座接口。</p> |

(6)北京市《门头沟区灾后重建规划平急两用设施与应急救援专项规划》

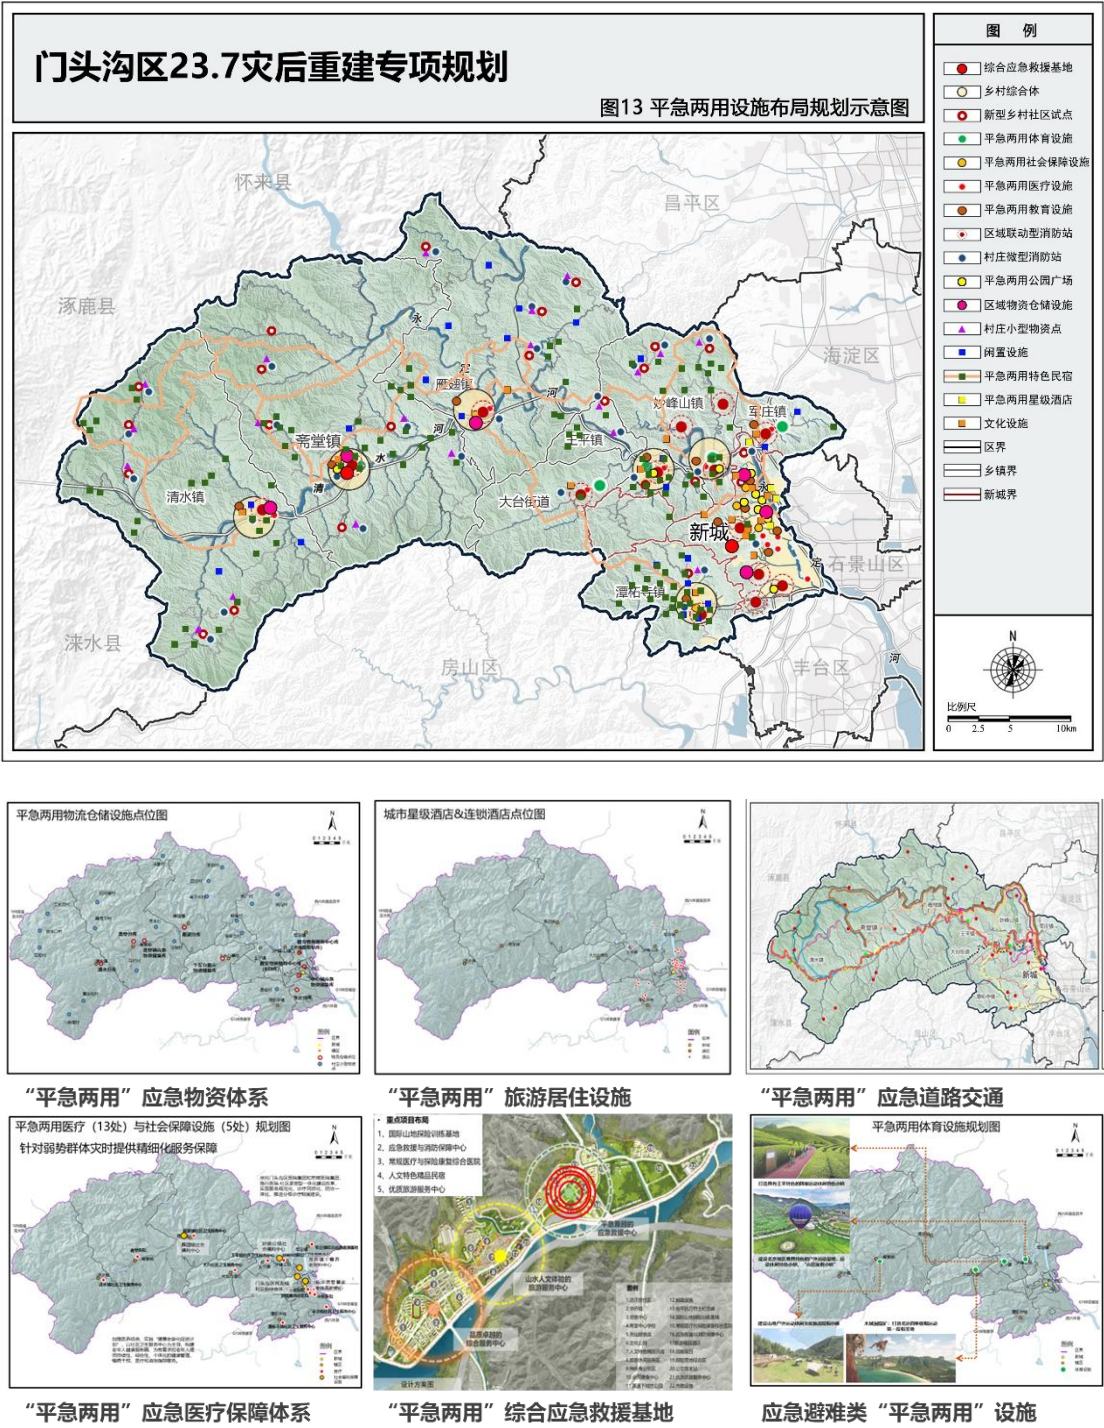

图 1 门头沟区“平急两用”设施布局规划示意图

门头沟区是全国第二个启动“平急两用”设施规划编制的城市。规划以问题为导向，通过门头沟暴雨洪涝、地质、地震等历史灾害特征和本次灾情调查，结合城镇国土空间规划，系统分析门头沟“平急两用”公共基础设施分灾种分类型建设需求范畴，合理分析及预测城市设定最大灾害效应情景下人员安置、隔离、疏散和生活物资储备及运输等“急”时需求规模，重点解决“建多少、在哪建、怎么建、用什么地、如何配套、如何管理”等问题，实现灾时“平急两用”公共基础设施顺利转换。

规划方案考虑了罕遇地震情景模拟、“23.7”特大暴雨情景模拟、地质灾害情境下应急物资配置等全灾种、全场景需求，构建“平急两用”设施一张图+清单，打造物资、安置、通行、医疗、救援、避难 6 个“平急两用”设施应用场景。

## 2. 成都

成都市在“平急两用”公共基础设施规划与建设中突出以数据支撑、统筹协同和标准引领为特色：一方面通过互联网大数据与基础数据结合，增强需求分析的精准性；另一方面提出功能、空间、设施、资源四大统筹策略，兼顾市区联动与存量增量匹配；同时构建“1+3”技术标准体系，细化布局、设计、建设与转换要求，确保规划落地可执行。其经验表明，规划编制需以量化分析和多源数据为基础，结合部门

事权设定指标体系，强化技术导则支撑，从而实现设施的合理布局与高效实施，对九江具有重要借鉴意义。

成都市自然资源规划局组织编制《成都市“平急两用”公共基础设施专项规划》，在专项规划编制过程中：一是结合地形与交通等特征划定空间分区，明确各类设施规模。在现状需求分析阶段，结合用地、交通、项目等数据，补充携程网、途家网等互联网大数据，扩展了现状分析的数据来源，使得现状资源更符合市场实际情况；二是提出了四大统筹策略，从功能统筹、空间统筹、设施统筹、资源统筹角度，考虑供需匹配关系、空间适配关系、市级与区县的协同关系、设施耦合关系、存量与新增的关系；三是结合成都实际情况建立指标体系，包含医疗卫生、城郊大仓、旅游居住、配套设施4大维度，从规模指标、覆盖指标、标准指标3个方面提出22项发展指标。

除此之外，成都市住房和城乡建设局牵头，会同市发改委、市文广旅局、市卫健委、市交通运输局编制形成《成都市“平急两用”公共基础设施建设技术指南（2024版）》，以及旅游居住设施、医疗应急服务点、城郊大型仓储基地3个建设技术导则，形成“1+3”技术标准体系，明确了建设导则与指引。例如《成都市“平急两用”公共基础设施建设技术指南（2024版）》明确了成都市“平急两用”公共基础设施建设的布局、选址、规划、功能配置、配套设施等总体技术

要求，以及平急转换、运行与维护的共性技术要求，分别针对三大类设施，从基本要求、选址条件、总平面、建筑、结构、给排水、通风与空调、电气、智能化、平急转换、运行与维护等方面制定了相应的配套建设技术导则。

《成都市“平急两用”公共基础设施专项规划》的特点是强化目标导向，以量化分析支撑需求研判，专业部门按事权划分统筹衔接相关工作。九江在规划编制的过程中，也应收集政府部门、市场等多源数据，充分分析供给和需求的数量和空间分布特征，为“平急两用”公共基础设施的布局提供更加扎实的基础和依据。同时，设施的规划和建设要求需结合各部门的事权，设定合理的考核指标，推动设施的落地实施。



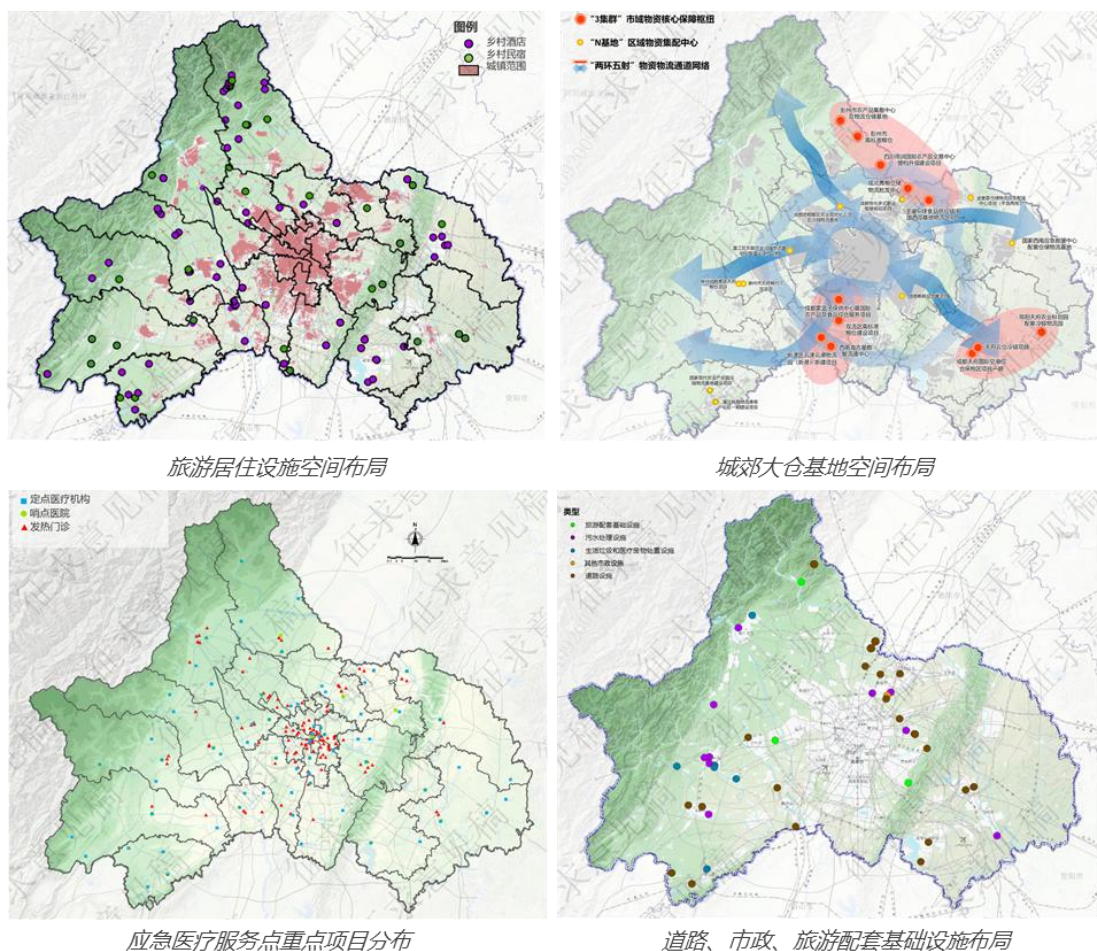

图 2 成都市“平急两用”公共基础设施空间布局

资料来源：《成都市“平急两用”公共基础设施专项规划》

### 3. 西安

西安市“平急两用”公共基础设施规划以体系构建为核心，突出与国土空间总体规划及相关专项规划的统筹衔接，通过多规合一、集约发展、依法选址三大策略，强化设施体系的完整性与可实施性。其做法包括：一是整合公共卫生、防灾、市政交通等专项成果，将文化体育设施、大型开敞空间、社区服务设施纳入“平急两用”体系；二是分级布局市县—乡镇—社区三级设施，便于与规划实施管理衔接；三是



结合开发边界开展空间底数梳理与冗余评估，建立需求测算、动态更新和启用次序机制，确保资源精准匹配。其经验表明，九江在规划编制中应注重与上位规划和专项规划的耦合，分层分类完善设施体系，并通过冗余与需求测算建立动态更新机制，以增强规划的科学性与操作性。

在《指导意见》以及省、市有关政策要求的基础上，西安市“平急两用”公共基础设施规划与《西安市国土空间总体规划（2021-2035 年）》设施体系、相关专项规划相衔接，整合了公共卫生、综合防灾、市政交通等相关专项规划成果，完善了设施体系。规划提出三大策略：一是多规合一，统筹布局。整合公共卫生、综合防灾、市政交通等相关专项规划成果，将“平急两用”公共基础设施与城乡空间、发展需求融合。二是规划引领，集约发展。与其他城乡空间相协调，保障设施全生命周期的安全使用。三是依法合规，科学选址。统筹重大突发公共事件应对和中心城区功能运转基础，衔接西安市国土空间规划建设管理体系，将“平急两用”公共基础设施用地和留白空间纳入“一张图”管理。

具体来看，规划一方面完善了设施体系，将应急道路交通设施等进行细化，并将大型文化/体育设施、大型开敞空间、社区服务设施纳入其他类型“平急两用”公共基础设施。另一方在设施分级上，结合国土空间规划管理体系，将平急两用设施层级分为市区（县）级、乡镇（街道）级、社区（村）

级，便于与规划实施管理相衔接。

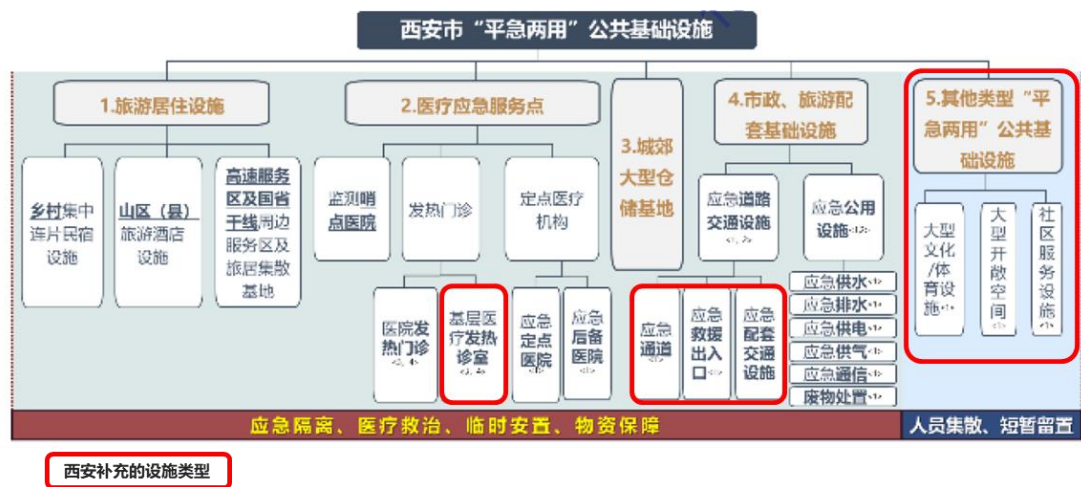

图 3 西安市“平急两用”公共基础设施体系

资料来源：《西安市“平急两用”公共基础设施专项规划（征求意见稿）》

同时，西安市按照城市开发边界内、外的划分，系统梳理设施承载空间和设施类型，明确空间底数的同时，也便于与规划传导中的城市开发边界内、外的详细规划管控相呼应。设施规划考虑冗余与需求测算，对已建已用的设施，进行冗余评估，对待建的设施重点进行急时需求测算，加强资源精准匹配。建立空间规划指引，强调分类分级进行落位和布局优化，提出总量要求、规划指引，建立设施动态更新机制，例如对于旅游居住设施，提出结合可利用地、人口密度、交通可达性等，对房源分配进行校核，参照突发事件应急预案，建立启用次序表；对于医疗卫生设施，提出增设的监测哨点医院、定点医院、医院发热门诊设施宜基于图斑独立选址，非独立占地的逐步从清单滚动调出；对于城郊大仓，结合等时圈、承载量等计算承储系数，承储系数越高越需布局

城郊大仓，分级规划核心仓+重点仓+中转站和配送点，远期中心城区的大仓基地由城区向外迁移。

西安市贯彻国家、省有关政策要求，加强项目与规划的衔接，构建本地“平急两用”公共基础设施体系。九江市的规划编制也应加强与相关政策、国土空间总体规划、专项规划的衔接，从空间层级、设施类型上进一步完善设施体系。

# 关于加强“平急两用”公共基础设施专项 规划与其他规划和建设实施衔接政策建议

## 一、背景与意义

当前，我国城镇化进程深入推进，城市系统复杂性日益增强，各类突发公共事件风险挑战增多。加快推进“平急两用”公共基础设施建设，是提升城市重大风险防控能力、保障人民群众生命财产安全的重大举措。“平急两用”公共基础设施专项规划作为指导“平急两用”设施体系化建设的重要依据，其与其他规划的衔接程度、与建设实施的结合深度，直接关系到设施体系的转换能力和实际效能。目前，在规划统筹、项目实施、要素保障等方面仍存在衔接不够顺畅等问题，亟需完善政策机制，构建从规划编制到建设运营的全链条管理体系。

## 二、基本原则

（一）战略引领，统筹布局。坚持立足当前、着眼长远，将“平急两用”设施建设纳入城市发展总体布局，与相关规划紧密衔接，实现设施体系与城市空间结构、功能布局有机融合。

**（二）平急结合，高效转换。**遵循“平时可用、急时管用”的功能定位，确保设施在规划设计阶段即兼顾日常功能与应急需求，实现两种状态下的快速、安全、高效转换。

**（三）政府主导，市场参与。**强化政府在规划统筹、政策制定、标准引领等方面的主导作用，同时创新投融资模式，充分调动社会力量参与设施建设与运营。

**（四）标准先行，规范管理。**加快建立覆盖规划设计、建设施工、运营管理、功能转换全周期的标准规范体系，提升设施建设管理的规范化、精细化水平。

**（五）协同联动，压实责任。**建立健全跨部门、跨层级的协同工作机制，明确各方责任，形成工作合力，确保各项任务落到实处。

### **三、重点任务**

#### **（一）健全规划统筹衔接机制**

**1.强化规划体系融合。**将“平急两用”公共基础设施专项规划依法纳入国土空间规划体系，作为详细规划和相关专项规划编制的重要依据。专项规划需严格落实国土空间总体规划确定的空间布局和管控要求。

**2.深化专项规划协同。**建立“平急两用”专项规划与发展改革、应急管理、卫生健康、交通运输、文化和旅游、生态环境等领域专项规划的协调衔接机制。重点在目标设定、设施布局、建设标准、实施时序等方面加强对接，确保规划内

容协调一致。

**3.保障规划空间落地。**在国土空间总体规划中前瞻性预留“平急两用”设施发展空间。在控制性详细规划编制和修改中，明确设施的空间位置、用地边界、控制指标以及“平急”转换的特定规划条件，为项目落地提供法定规划依据。

## **（二）优化项目全周期管理**

**4.完善项目生成机制。**建立“平急两用”项目联合筛查论证机制，由发展改革、住房城乡建设、自然资源等部门共同参与，对项目的功能定位、建设规模、空间布局、转换方案等进行综合论证，确保项目科学性和可行性。

**5.实施项目库动态管理。**依托现有“平急两用”信息平台，建立“平急两用”项目“谋划库、储备库、建设库”，实行分级分类、动态更新管理。纳入储备库的项目应达到规定的深度要求。

**6.畅通项目审批通道。**优化“平急两用”项目审批流程，在立项、用地、规划、环评等环节建立绿色通道，推行并联审批、容缺受理等模式，提高审批效率。

## **（三）强化资源要素保障**

**7.创新土地利用政策。**对“平急两用”设施用地计划指标予以优先保障。鼓励采用长期租赁、先租后让、弹性年期出让等方式供应土地。支持对具备条件的存量建筑和低效用地进行改造利用，挖掘空间潜力。

**8.加大财政支持力度。**积极争取中央预算内投资、超长期特别国债等资金支持。地方财政部门应结合财力可能，将“平急两用”设施建设和运维资金纳入年度预算。鼓励地方依法依规设立相关基金，支持设施能力提升和持续运营。

**9.拓宽多元化融资渠道。**对具备一定收益性的设施，积极引导社会资本参与，稳妥推进基础设施领域不动产投资信托基金（REITs）。完善“急时”征用补偿制度，保护社会投资者合法权益。

#### **（四）完善标准与建设运营管理**

**10.加快标准规范制定。**住房城乡建设主管部门应会同相关部门，加快制定和完善“平急两用”设施在设计、施工、验收、运维及功能转换等方面的技术标准、导则和工法，形成完善的标准体系。

**11.严格建设过程管控。**全面推行“平急双态”设计，在方案设计和施工图审查中强化对应急功能实现路径、设备系统冗余、管线接口预留等关键内容的专项审查。加强施工质量安全监管，确保工程实体按图施工、符合标准。

**12.提升智慧运维水平。**推动“平急两用”设施智能化改造和数字化转型，鼓励接入城市信息模型（CIM）平台等管理系统。建立设施运行监测和定期维护制度，完善“平急”转换预案并加强实战演练，确保设施持续处于良好状态。

## **四、组织保障**

**加强组织领导。**地方各级人民政府要切实承担主体责任，建立由政府负责同志牵头的协调推进机制，明确住房城乡建设、发展改革部门为牵头单位，统筹协调自然资源、财政、应急管理、卫生健康等相关部门，及时解决规划衔接和项目落地中的重大问题。

**强化监督评估。**建立健全“平急两用”公共基础设施建设实施的动态监测、定期评估和反馈机制。将规划实施、项目建设、设施运维等情况纳入相关考核体系，评估结果作为优化政策、安排投资、改进管理的重要依据。

**鼓励试点先行。**支持有条件的地方和项目开展试点示范，在规划协同、用地保障、投融资模式、建设运营机制等方面进行创新探索。及时总结提炼可复制的经验做法，加强宣传交流与推广。
