# Supplementary material
Source: Research Square preprint supplement (doi:10.21203/rs.3.rs-9461961/v1)
Supplement: Supplementary file 3 [file 关于印发北京市推动“平急两用”公共基础设施建设工作专班组建方案的通知.pdf › Supplementary materias/关于印发北京市推动“平急两用”公共基础设施建设工作专班组建方案的通知.pdf]

# 北京市发展和改革委员会文件

京发改〔2024〕471号

## 北京市发展和改革委员会 关于印发北京市推动“平急两用”公共基础设施建设工作专班组建方案的通知

北京市推动“平急两用”公共基础设施建设工作专班成员单位：

经市政府批准同意，本市设立推动“平急两用”公共基础设施建设工作专班。现将《北京市推动“平急两用”公共基础设施建设工作专班组建方案》印发给你们，请认真履行成员单位职责，扎实有效开展工作，高质量推动“平急两用”公共基础设施建设。

请贵单位（区）明确1名领导同志担任工作专班成员，1名联络员负责具体协调沟通事宜。请于3月28日之前反馈人员名单。

特此通知。

- 附件：1. 北京市推动“平急两用”公共基础设施建设工作专班组建方案
2. 北京市推动“平急两用”公共基础设施建设工作专班成员名单

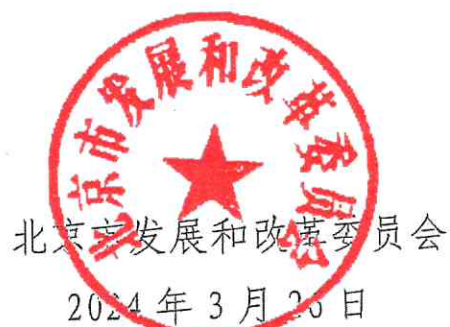

(联系人：区域处 郭向荣； 联系电话：55590209)

附件 1

## 北京市推动“平急两用”公共基础设施建设 工作专班组建方案

按照国务院办公厅《关于积极稳步推进超大特大城市“平急两用”公共基础设施建设的指导意见》（国办发〔2023〕24号）、国家发展改革委《关于积极稳步推进超大特大城市“平急两用”公共基础设施建设的通知》要求，经市政府批准同意，拟设立本市推动“平急两用”公共基础设施建设工作专班（以下简称“工作专班”），并制定以下工作规则。

### 一、主要职责

工作专班主要负责统筹本市“平急两用”公共基础设施战略布局、建立完善配套支持政策和标准规范、协调解决项目推进过程中的重大问题、开展综合评估和宣传推广等工作。具体包括：

（一）建立完善工作专班工作机制。

（二）研究制定本市“平急两用”公共基础设施建设总体实施方案。组织制定年度工作计划和项目清单。

（三）协调指导具备条件的区编制“平急两用”公共基础设施建设方案，谋划储备“平急两用”公共基础设施项目，有序推动“平急两用”体系建设。

（四）统筹推进完善“平急两用”公共基础设施建设相关支持政策，分类制定“平急两用”公共基础设施建设标准规范。

（五）建立完善“平急两用”相关应用场景预案，组织开展



“平急两用”压力测试和沙盘演练。

(六) 搭建“平急两用”信息化管理平台。

(七) 组织召开工作专班会议，定期协调调度，协助解决重点难点问题，及时将重要情况向市政府报告。

(八) 组织开展宣传推广和总结评估工作，总结交流先进工作经验和典型工作案例。

(九) 完成市政府交办的其他相关事项。

## 二、组织架构

工作专班实行高位统筹，由常务副市长任总召集人，市政府分管副秘书长、市发展改革委主要负责同志任召集人，各成员单位分管负责同志为专班成员。工作专班成员单位由推动“平急两用”公共基础设施建设的市有关部门和相关区组成，包括市发展改革委、市财政局、市规划自然资源委、市生态环境局、市住房城乡建设委、市交通委、市农业农村局、市商务局、市文化和旅游局、市卫生健康委、市应急局、市园林绿化局、市国动办、市消防救援总队、中国人民银行北京市分行、国家金融监管总局北京监管局、市委金融办、市疾控局、国家开发银行北京分行、中国农业发展银行北京分行及平谷区、门头沟区、房山区、昌平区、顺义区、大兴区（含北京经济技术开发区）、怀柔区、密云区、延庆区等相关区。

工作专班下设办公室和政策研究组、设施标准组、项目推进组、预案演练及信息化组。工作人员根据需要从成员单位临时抽调。

### 三、职责分工

#### （一）工作专班办公室

牵头单位：市发展改革委。

配合单位：工作专班所有成员单位。

工作职责：统筹协调工作专班各项工作，牵头研究制定本市“平急两用”公共基础设施建设总体实施方案，组织编制全市年度工作计划和项目清单，加强协调调度，组织开展年度总结评估和宣传推广工作等。

#### （二）政策研究组

牵头单位：市发展改革委。

配合单位：市财政局、市规划自然资源委、市农业农村局、市住房城乡建设委、市商务局、市文化和旅游局、市应急局、中国人民银行北京市分行、国家金融监管总局北京监管局、市委金融办等。

工作职责：落实国家推动“平急两用”公共基础设施建设的“1+N”政策体系要求，围绕财政资金、建设用地、项目管理、金融支持、产业扶持等方面出台本市支持“平急两用”公共基础设施建设的配套政策。

#### （三）设施标准组

牵头单位：市规划自然资源委、市住房城乡建设委。

配合单位：市卫生健康委、市应急局、市交通委、市农业农村局、市商务局、市文化和旅游局、市应急局、市园林绿化局、市国动办、市疾控局、市消防救援总队、平谷区政府等。

工作职责：充分总结疫情防控 and 抢险救灾工作经验教训，开

展摸底调查，摸清新冠疫情高峰期间和“23·7”特大暴雨洪涝灾害转运人员数量，统计防灾避险设施数量和转急设施数，有针对性的提出预设应用场景，为全市“平急两用”公共基础设施建设提供依据。围绕旅游居住设施、高速公路服务区、多功能公共服务设施、城郊大仓等不同类型设施制定建设标准规范，完善“平急两用”标准体系。

#### （四）项目推进组

牵头单位：市发展改革委、市住房城乡建设委。

配合单位：工作专班所有成员单位。

工作职责：针对不同场景，组织各区谋划储备“平急两用”公共基础设施项目，针对储备项目开展联合审核，推动“平急两用”公共基础设施项目建设，项目建成后开展验收，纳入本市“平急两用”公共基础设施清单统一调配。

#### （五）预案演练及信息化组

牵头单位：市应急局。

配合单位：市卫生健康委、市交通委、市农业农村局、市商务局、市文化和旅游局、市园林绿化局、市疾控局、市消防救援总队、相关区政府等。

工作职责：负责建设“平急两用”智能信息管理平台，推动“平急两用”智能信息管理平台融入智慧城市体系，纳入全市应急管理体系统筹调配。围绕不同类型“平急两用”设施，针对公共卫生事件、防灾减灾等不同应用场景，分别制定平急转化预案体系，充分利用智能信息管理平台开展平急转化实战演练。



## 四、协调机制

### （一）会议及公文机制

工作专班会议分为全体会议、专题会议和办公室会议。全体会议、专题会议由总召集人召集，或者总召集人委托召集人召集，负责审议“平急两用”相关重大政策文件、年度重大项目及重点任务、协调调度需提请市委市政府决策的重大事项等。办公室会议由工作专班办公室召集，结合实际需要邀请相关成员单位及其他相关部门参加，负责调度或专题研究相关工作。相关会议根据需要不定期组织召开。

工作专班不刻印章，以工作专班办公室名义行文时，由市发展改革委代章。工作专班以会议纪要形式明确会议议定事项，印发有关单位。

### （二）总结评估

由工作专班办公室组织开展“平急两用”年度工作总结评估，并向市政府报告。适时组织交流典型经验和创新做法，开展宣传推广。

### （三）信息报送

各成员单位于每季度结束后五个工作日内将上季度工作开展情况报工作专班办公室，重大情况可随时报送，工作专班办公室汇总梳理形成信息或报告材料向市政府报告。

附件 2

北京市推动“平急两用”公共基础设施建设  
工作专班成员名单

|     | 姓名 | 单位 | 职务 | 联系方式 |
|-----|----|----|----|------|
| 成员  |    |    |    |      |
| 联络员 |    |    |    |      |
