# Supplementary material
Source: Research Square preprint supplement (doi:10.21203/rs.3.rs-9461961/v1)
Supplement: Supplementary file 4 [file 关于对推进本市 “平急两用”公共基础设施建设总体实施方案及工作专班组建方案征求意见的函.pdf › Supplementary materias/关于对推进本市 “平急两用”公共基础设施建设总体实施方案及工作专班组建方案征求意见的函.pdf]

# 关于对推进本市“平急两用”公共基础设施建设总体 实施方案及工作专班组建方案征求意见的函

各相关单位：

为贯彻落实国务院办公厅《关于积极稳步推进超大特大城市“平急两用”公共基础设施建设的指导意见》，按照市政府主要领导指示精神，市发改委会同市有关部门及相关区研究制定了《关于推进本市“平急两用”公共基础设施建设总体实施方案》《北京市推动“平急两用”公共基础设施建设工作专班组建方案》。

现将有关文件征求意见稿转去，请贵单位研提意见，并于12月4号（周一）下班前将修改意见反馈我委社会科邮箱 fgwshk@bjmtg.gov.cn，逾期不反馈视为无意见。

专此函达。

附件：1. 《关于推进本市“平急两用”公共基础设施建设总体实施方案》（征求意见稿）

2. 《北京市推动“平急两用”公共基础设施建设  
工作专班组建方案》（征求意见稿）

门头沟区发展和改革委员会

2023年12月1日

（联系人：社会科 陈雪松 房孝佳；联系电话：69857174）

## 附件 1

# 关于推进本市“平急两用” 公共基础设施建设总体实施方案

（征求意见稿）

为落实国务院办公厅《关于积极稳步推进超大特大城市“平急两用”公共基础设施建设的指导意见》，努力建设具有首都特色的“平急两用”公共基础设施体系，持续增强城市安全韧性能力，特制定本实施方案。

## 一、总体要求

### （一）指导思想

以习近平新时代中国特色社会主义思想为指导，深入贯彻落实习近平总书记关于疫情防控和“平急两用”公共基础设施建设的指示精神，坚持以人民为中心的发展思想，以新时代首都发展为统领，更好的统筹发展和安全，重点聚焦全面提升疫情防控能力，兼顾具备防洪、防火等防灾减灾等应用场景需要，以“平急两用”公共基础设施建设为重要抓手，贯通应用场景、建设标准、政策体系、实战演练等各个环节，着力补齐隔离安置房源、医疗卫生服务、应急物资转运、防灾避险设施等短板，打造“功能可转换、空间可承载、发展可持续、经济有支撑、安全有保障”的“平急两用”体系，为建设国际一流的和谐宜居之都奠定坚实基础。

## （二）基本原则

**坚持系统观念、底线思维。**统筹做好“平急两用”公共基础设施建设与疫情防控、韧性城市、乡村振兴、旅游休闲等相关工作的衔接，既要补齐应急、物流等能力短板，增强城市安全韧性，也要拉动上下游投资和消费，促进经济发展。居安思危，坚持宁可备而不用、不可用而无备，通过存量挖潜、增量织补、远近结合，系统推进设施建设和改造，并适当预留冗余能力。

**坚持政府引导、市场主导。**明确政府与社会的责任边界，政府负责规划编制、标准制定、资金引导、监督管理以及配套公益性基础设施建设等政策支持，创造良好营商环境，鼓励吸引市场主体特别是民间资本做好“平急两用”公共基础设施建设，以平养急、以产养能、成本共担，依靠产业形态保障项目全生命周期运营，实现可持续发展。

**坚持建管并重、能力为先。**按照不同应用场景开展设施建设和改造，健全完善配套政策、建设标准、实施细则、信息管理等管理措施，组织实地演练，重在优先形成“平急两用”转换能力，确保“平时”运营可持续、“急时”设施用得上、用得好。

**坚持试点先行、稳妥推进。**支持平谷区率先探索实践，积极创建国家“平急两用”发展先行区。其他各区尽力而为、量力而行，根据自身资源禀赋、投融资能力等实际情况推进工作。严守耕地和永久基本农田保护红线，统筹做好“平急两用”公共基础设施空间规划和用地保障。在保护农民利益、不改变乡村基本风



貌形态的基础上，对于乡村民宿和旅游酒店等资源丰富、建设改造条件成熟的优先启动建设，对资金筹措难、资源要素分散、经营收益不足的不强制要求，条件成熟后再启动，防止资源浪费。

### （三）主要目标

逐步构建本市“1+3+5”的“平急两用”格局，“1”暨在平谷区创建国家“平急两用”发展先行区，主要承担中心城六区、城市副中心及本区的隔离和避险避灾人员安置任务；“3”暨在门头沟区、房山区、昌平区3个区结合灾后重建落实“平急两用”工作要求，主要承担本区隔离和避险避灾人员安置任务，补齐防灾避险设施短板；“5”暨在顺义区、大兴区（含北京经济技术开发区）、怀柔区、密云区、延庆区有序落实“平急两用”工作要求，主要承担本区隔离和避险避灾人员安置任务。

到2025年，建设改造一批具备紧急集中安置条件、具有疫情隔离功能的健康型旅游设施房源，实现归集纳管规模达到2万间。启动建设一批具备快速中转能力的城郊大型仓储（下称大仓）基地，逐步完善提升一批医疗卫生服务设施，结合“23·7”灾后重建工作建成一批“平急两用”的防灾避险设施，初步形成相关标准、资金、用地等政策保障体系，具备较为成熟的应急管理处置能力。

到2027年，应对城市大规模突发事件、严重自然灾害等全场景、超预期风险的综合能力稳步提升，城市健康治理现代化能力显著提高，安全韧性水平进一步增强。建设改造具备紧急集中

安置条件、具有疫情隔离功能的归集纳管旅游设施房源约 4.4 万间；城郊大仓基地布局建设稳步推进，物流体系平急转换和应急物资保障能力进一步匹配应急需求。

## 二、重点任务

### （一）全力支持平谷区创建国家“平急两用”发展先行区

落实《北京市平谷区试点建设国家“平急两用”发展先行区实施方案》。到 2025 年，打造渔阳滑雪场等乡村休闲综合体以及南山等新型乡村社区，提供超 1 万间具有疫情隔离功能的旅游设施房源；建成京平综合物流枢纽，实施平谷智慧冷链产业园等一批重点物流项目，高标库面积达到 313 万平方米，物资储备能力达到 470 万吨；基本建成承平高速公路、轨道交通平谷线，推进平谷地方铁路与京哈铁路连接，打造骨干交通通道。明确“平急两用”转换预案，建立较为完善的政策体系、建设模式、建设标准等，形成一整套可向其他地区复制推广的经验成果，在全国率先打造“北京标杆”。（责任单位：平谷区政府、市发展改革委、市财政局、市规划自然资源委、市住房城乡建设委、市交通委、市商务局、市文化旅游局、市卫生健康委、市金融监管局、市疾控中心）

### （二）精准分类制定建设标准规范

研究论证突发重大疫情、重大灾害类型，按照疫情防控、防灾避险等需求尽快修编包括民宿、酒店等旅游居住设施，展览馆、体育馆、学校、公园绿地等公共服务设施以及高速公路服务区、

乡村公路等交通设施在内的不同类型设施建设标准规范，研究分布式能源、水源等实现路径，完善医疗卫生各级设施建设规范，在保障设施原有功能正常发挥的基础上，嵌入疫情防控和防灾避险功能，做到“设施可识别、功能可验收、资源可纳管”，实现融合、可持续发展。（责任单位：市卫生健康委、市住房城乡建设委、市教委、市文化和旅游局、市体育局、市商务局、市城市管理委、市交通委、市农业农村局、市应急局、市园林绿化局、市疾控中心、平谷区政府）

### （三）重点打造一批具备“平急两用”功能的旅游居住设施

综合考虑地理区位、旅游资源、交通条件等因素，在系统梳理全市应急设施和疫情防控隔离设施资源基础上，严格按照“三区两通道”（隔离区、工作准备区、缓冲区、工作人员通道、隔离人员通道）等传染病防治要求，因地制宜打造一批具备紧急隔离、集中安置、远程办公、休闲度假等多功能的民宿酒店设施。新城地区优先改造具备条件的新冠疫情隔离酒店设施，乡村地区优先选取资源集中连片、交通便利区域新建改造一批民宿设施。到2025年，改造提升顺义区川航大酒店等一批旅游酒店设施，新建、改造延庆区野鸭湖星辰营地等一批集中连片民宿，全市归集纳管健康型旅游居住设施总房源不少于2万间。（责任单位：市文化和旅游局、市农业农村局、市卫生健康委、市规划自然资源委、市住房城乡建设委、市发展改革委、市财政局、相关区政府）



#### （四）探索建设高速公路服务区旅居集散基地

结合中心城区通往山区旅游景点高速公路服务区建设，严格按照检疫检测、应急中转等应对大规模疫情实际需要的规范标准，加快推进承平高速公路金海湖服务区旅居集散地建设，打造集加油充电、餐饮住宿、停车休闲等多种功能于一体的旅居集散地。研究储备在国道 108 新线高速公路服务区、涞宝路新线高速公路服务区复制承平模式的可行性，“平时”作为旅游集散中心和汽车旅馆，缓解旅游旺季交通拥堵问题，“急时”转为应急隔离和物资储备设施。（责任单位：市交通委、市发展改革委、市文化和旅游局、市卫生健康委、市商务局、市住房城乡建设委、市规划自然资源委）

#### （五）补充完善医疗卫生应急服务体系

充分发挥中心城区高水平医院支援带动作用，按照“平急两用”公共基础设施建设规模和隔离人员承载数量，聚焦检验检测、感染防控、基本医疗卫生和急危重症患者应急救治需要，推动区级综合医院提标扩能，在乡镇、村优化储备医疗应急服务点，提升突发疾病和意外伤害救助能力，“平时”提升周边居民日常诊疗服务能力，“急时”转为定点医疗机构。（责任单位：市卫生健康委、市疾控中心、市农业农村局、市发展改革委、市财政局、市规划自然资源委、市住房城乡建设委、相关区政府）

#### （六）整体增强物资应急储备调配能力

打造城郊大仓基地，加强粮食、物流等战略物资储备，补齐

全市物流体系短板，强化应急保供功能，“平时”服务城市生活物资中转分拨，“急时”快速用于应急物资和生活物资保障。严格按照不同场景要求，合理布局物流基地和初级农产品批发市场等，保障城郊大仓面积不低于1000亩。推广公铁结合模式，完善物流仓储应急预案，实现平急快速转换。落实全市“6个大型物流基地+4个综合性一级农产品批发市场”的物资保障体系，升级改造顺义空港、通州马驹桥、大兴京南、平谷马坊物流基地，高标准建设房山窦店、昌平南口物流基地、北京鲜活农产品流通中心等，沿城市快速干线布局医药、初级农产品及其他生活物资专业服务型物流集散中心。加快建设通马路、密西路等配套路网建设，确保应急物资“运得进、存得住、调得出”。（责任单位：市商务局、市农业农村局、市发展改革委、相关区政府）

#### （七）推进建设一批多功能公共服务设施

充分考虑地形地质、电力通讯、市政配套等立地条件，在保证公共服务设施原有使用功能正常发挥的基础上，“平急两用”嵌入疫情隔离、防灾避险等功能，对门头沟区、房山区、昌平区等易受自然灾害的区，完善基层应急体系，结合学校、医院、文化活动场地恢复重建和功能提升，合理布局一批集防灾避险、物资保障、应急通讯、空中救援及气象、地勘监测等为一体的综合性设施。改造提升房山区河北镇中心校等，嵌入疫情隔离、应急物资储备等功能。扩大山区通信系统覆盖范围，适度超前布局民用卫星通讯基础设施。有序布局一批乡村应急安全小屋，满足乡



村应急用电、通讯、供水保障、医疗救助等需要。实现乡村公路、森林步道、防火路、旅游步道等“一路多功能”建设，打造一批具备融合功能的公共服务设施。（责任单位：市应急局、市教委、市卫生健康委、市文化和旅游局、市农业农村局、市园林绿化局、相关区政府）

#### （八）有序提升周边市政、旅游等配套设施服务水平

优先将“平急两用”公共基础设施配套道路、通信、垃圾污水处理、医疗废弃物处理等配套项目纳入市、区两级重点工程计划加快推进，按现行投资政策由政府投资予以支持。完善“平急两用”交通体系，采用“穿山越岭”方式建设山区主干生命线走廊，加强主干生命线内部联络线建设，与山区主通道形成环路。加强“平急两用”公共基础设施周边绿化景观、停车等旅游基础设施建设，积极开展城乡环境卫生清理整治，打造优质旅游资源，提升盈利水平，增强“以平养急”能力。（责任单位：相关区政府、市交通委、市发展改革委、市财政局、市住房城乡建设委、市规划自然资源委）

#### （九）加快搭建“平急两用”信息化管理平台

依托全市“平急两用”公共基础设施资源库，研究利用新技术、新手段搭建“平急两用”智能信息管理平台，“平时”用于“平急两用”公共基础设施日常管理、实时监测、沙盘演练等，“急时”用于指挥调度、监测预警、应急处置等。“平急两用”智能信息管理平台融入智慧城市体系，纳入全市应急管理体系系统

筹调配，切实提升平急转换效率，尽快形成应急保障能力。（责任单位：市应急局、市卫生健康委、市文化和旅游局、市农业农村局、市住房城乡建设委、市经济和信息化局、市发展改革委、市财政局、相关区政府）

#### （十）按照“实战”要求建立相关管理措施

以“用得好不好”作为检验“平急两用”公共基础设施建设成效的重要标准。在加快推进各类硬件设施建设的同时，针对不同应用场景，健全各领域、各环节的管理办法和工作指引，结合现有的应急指挥系统，市、区两级分别形成“一平台”（智能信息管理平台）、“一库”（设施资源库）、“一图”（设施分布图）、“一表”（启用流程表）、“一箱”（全链条的支持政策工具箱）。建立动态管理机制，完善平急转化预案体系，定期组织开展人员培训、沙盘演练，查漏补缺、及时补充完善起到关键作用的“小政策、小办法”。（责任单位：相关区政府、市应急局、市发展改革委、市住房城乡建设委、市规划自然资源委、市卫生健康委、市文化和旅游局、市农业农村局）

### 三、保障措施

#### （一）加强组织实施

实行专班推进，成立市领导牵头市级工作专班，办公室设在市发展改革委，市级相关部门和区参加，按照各自职责，主动对接国家部委，制定本市“平急两用”建设规模、标准、资金、用地等配套政策措施。项目化推进，充分利用本市现代化基础设施



体系重大项目评估筛选机制，加强项目论证，开展动态更新，不断完善协同实施机制。

## （二）强化要素保障

将“平急两用”公共基础设施用地纳入城乡规划各级各类规划，确保相关设施规划用地不冲突，确保节约集约用地。在需要实施土地出让的环节，必须实行“净地出让”，由政府主导推进土地整理开发储备，解决土地征收、拆迁补偿等问题，在没有法律纠纷的条件下，按规定出让或划拨用地。

## （三）创新支持方式

充分发挥市场机制作用，政府给予必要的投融资等政策支持，鼓励吸引社会资本，特别是更多民间资本参与“平急两用”公共基础设施建设改造和运营维护。对纳入“一库”的项目，统筹用好中央预算内投资、地方政府专项债券、市级财政性资金等支持方式，公益性设施由政府投资按照现行政策予以支持，经营性设施由政策性金融机构积极给予融资支持。通过出台“平急两用”公共基础设施应急征用补偿办法、纳入政府会议定点采购单位名录、发放消费券、评星级加分等鼓励措施，进一步增强社会资本吸引力。

## （四）加强监督管理

市级工作专班办公室要充分发挥综合协调作用，及时协调解决各项任务推进过程中遇到的困难和问题，加快推进各项工作落地落实，确保任务按期完成。同时，加强政策宣传解读，推广典



型经验做法，切实发挥“平急两用”公共基础设施在增强城市安全韧性，促进经济发展等方面重要作用。

## 附件 2

# 北京市推动“平急两用”公共基础设施建设 工作专班组建方案

(征求意见稿)

按照国务院办公厅《关于积极稳步推进超大特大城市“平急两用”公共基础设施建设的指导意见》(国办发〔2023〕24号)、国家发展改革委《关于积极稳步推进超大特大城市“平急两用”公共基础设施建设的通知》要求,经市政府批准同意,拟设立本市推动“平急两用”公共基础设施建设工作专班(以下简称“工作专班”),并制定以下工作规则。

### 一、主要职责

工作专班主要负责统筹本市“平急两用”公共基础设施战略布局、建立完善配套支持政策和标准规范、协调解决项目推进过程中的重大问题、开展综合评估和宣传推广等工作。具体包括:

(一)建立完善工作专班工作机制。

(二)研究制定本市“平急两用”公共基础设施建设总体实施方案。组织制定年度工作计划和项目清单。

(三)协调指导具备条件的区编制“平急两用”公共基础设施建设方案,谋划储备“平急两用”公共基础设施项目,有序推动“平急两用”体系建设。

(四)统筹推进完善“平急两用”公共基础设施建设相关支持政策,分类制定“平急两用”公共基础设施建设标准

规范。

（五）建立完善“平急两用”相关应用场景预案，组织开展“平急两用”压力测试和沙盘演练。

（六）搭建“平急两用”信息化管理平台。

（七）组织召开工作专班会议，定期协调调度，协助解决重点难点问题，及时将重要情况向市政府报告。

（八）组织开展宣传推广和总结评估工作，总结交流先进工作经验和典型工作案例。

（九）完成市政府交办的其他相关事项。

## 二、组织架构

工作专班实行高位统筹，由常务副市长任总召集人，市政府分管副秘书长、市发展改革委主要负责同志任召集人，各成员单位分管负责同志为专班成员。工作专班成员单位由推动“平急两用”公共基础设施建设的市有关部门和相关区组成，包括市发展改革委、市财政局、市规划自然资源委、市生态环境局、市住房城乡建设委、市交通委、市农业农村局、市商务局、市文化和旅游局、市卫生健康委、市应急局、市园林绿化局、中国人民银行北京营管部、市金融监管局、市疾控中心、国家开发银行北京分行、中国农业发展银行北京分行及平谷区、门头沟区、房山区、昌平区、顺义区、大兴区（含北京经济技术开发区）、怀柔区、密云区、延庆区等相关区。

工作专班下设办公室和政策研究组、设施标准组、项目推进组、预案演练及信息化组。工作人员根据需从成员单



位临时抽调。

### 三、职责分工

#### （一）工作专班办公室

牵头单位：市发展改革委。

成员单位：工作专班所有成员单位。

工作职责：统筹协调工作专班各项工作，牵头研究制定本市“平急两用”公共基础设施建设总体实施方案，组织编制全市年度工作计划和项目清单，加强协调调度，组织开展年度总结评估和宣传推广工作等。

#### （二）政策研究组

牵头单位：市发展改革委。

成员单位：市财政局、市规划自然资源委、市农业农村局、市住房城乡建设委、市商务局、市文化和旅游局、市应急局、中国人民银行北京营管部、市金融监管局等。

工作职责：落实国家推动“平急两用”公共基础设施建设的“1+N”政策体系要求，围绕财政资金、建设用地、项目管理、金融支持、产业扶持等方面出台本市支持“平急两用”公共基础设施建设的配套政策。

#### （三）设施标准组

牵头单位：市住房城乡建设委、市卫生健康委、市应急局。

成员单位：市交通委、市农业农村局、市商务局、市文化和旅游局、市应急局、市园林绿化局、市疾控中心、平谷区政府等。

工作职责：充分总结疫情防控和抢险救灾工作经验教训，开展摸底调查，摸清新冠疫情高峰期间和“23·7”特大暴雨洪涝灾害转运人员数量，统计防灾避险设施数量和转急设施数，有针对性的提出预设应用场景，为全市“平急两用”公共基础设施建设提供依据。围绕旅游居住设施、高速公路服务区、多功能公共服务设施、城郊大仓等不同类型设施制定建设标准规范，完善“平急两用”标准体系。

#### （四）项目推进组

牵头单位：市住房城乡建设委、市发展改革委。

成员单位：工作专班所有成员单位。

工作职责：针对不同场景，组织各区谋划储备“平急两用”公共基础设施项目，针对储备项目开展联合审核，推动“平急两用”公共基础设施项目建设，项目建成后开展验收，纳入本市“平急两用”公共基础设施库统一调配。

#### （五）预案演练及信息化组

牵头单位：市应急局、市经济和信息化局。

成员单位：工作专班所有成员单位。

工作职责：负责建设“平急两用”智能信息管理平台，推动“平急两用”智能信息管理平台融入智慧城市体系，纳入全市应急管理体系统筹调配。围绕不同类型“平急两用”设施，针对公共卫生事件、防灾减灾等不同应用场景，分别制定平急转化预案体系，充分利用智能信息管理平台开展平急转化实战演练。

### 四、协调机制

### （一）会议及公文机制

工作专班会议分为全体会议、专题会议和办公室会议。全体会议、专题会议由总召集人召集，或者总召集人委托召集人召集，负责审议“平急两用”相关重大政策文件、年度重大项目及重点任务、协调调度需提请市委市政府决策的重大事项等。办公室会议由工作专班办公室召集，结合实际需要邀请相关成员单位及其他相关部门参加，负责调度或专题研究相关工作。相关会议根据需要不定期组织召开。

工作专班不刻印章，以工作专班办公室名义行文时，由市发展改革委代章。工作专班以会议纪要形式明确会议议定事项，印发有关单位。

### （二）总结评估

由工作专班办公室组织开展“平急两用”年度工作总结评估，并向市政府报告。适时组织交流典型经验和创新做法，开展宣传推广。

### （三）信息报送

各成员单位于每季度结束后五个工作日内将上季度工作开展情况报工作专班办公室，重大情况可随时报送，工作专班办公室汇总梳理形成信息或报告材料向市政府报告。
