# Supplementary material
Source: Research Square preprint supplement (doi:10.21203/rs.3.rs-9461961/v1)
Supplement: Supplementary file 5 [file 团体标准《“平急两用”公共基础设施专项规划编制指南(征求意见稿)》.pdf › Supplementary materias/团体标准《“平急两用”公共基础设施专项规划编制指南(征求意见稿)》.pdf]

ICS号  
中国标准文献分类号

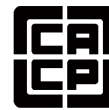

# 团体标准

T/CACP XXXX—XXXX

## “平急两用”公共基础设施专项规划 编制指南

(Guidelines for Spatial Plan of Public Infrastructures  
for Both Normal and Emergency Use)

(征求意见稿)

XXXX-XX-XX 发布

XXXX-XX-XX 实施

中国城市规划协会 发布



# 目 次

|                                                    |     |
|----------------------------------------------------|-----|
| 前 言 .....                                          | II  |
| 引 言 .....                                          | III |
| 1 范围 .....                                         | 1   |
| 2 规范性引用文件 .....                                    | 1   |
| 3 术语和定义 .....                                      | 2   |
| 4 一般性规定 .....                                      | 4   |
| 4.1 规划定位 .....                                     | 4   |
| 4.2 规划范围与期限 .....                                  | 4   |
| 4.3 编制原则 .....                                     | 4   |
| 5 现状调查与需求分析 .....                                  | 5   |
| 5.1 基础情况调查 .....                                   | 5   |
| 5.2 城市韧性评估 .....                                   | 7   |
| 5.3 设施需求分析 .....                                   | 8   |
| 6 规划目标与空间布局 .....                                  | 9   |
| 6.1 平急功能复合规划的目标制定 .....                            | 9   |
| 6.2 设施选址指引 .....                                   | 9   |
| 6.3 规划空间布局 .....                                   | 11  |
| 7 实施保障与平急转换指引 .....                                | 17  |
| 7.1 近期实施规划 .....                                   | 17  |
| 7.2 平急转换指引 .....                                   | 18  |
| 7.3 规划实施保障措施 .....                                 | 19  |
| 8 成果要求 .....                                       | 20  |
| 8.1 规划成果构成和形式 .....                                | 20  |
| 8.2 规划文本 .....                                     | 20  |
| 8.3 规划图件 .....                                     | 20  |
| 8.4 数据库 .....                                      | 21  |
| 8.5 规划附件 .....                                     | 21  |
| 附 录 A     （规范性） “平急两用”公共基础设施专项规划推荐指标 .....         | 23  |
| 附 录 B     （规范性） “平急两用”公共基础设施专项规划土地利用相关保障措施建议 ..... | 24  |
| 参 考 文 献 .....                                      | 25  |



# 引 言

“平急两用”公共基础设施是为应对各类城市安全风险隐患而体系化设立的公共基础设施，“平时”用作旅游、康养、医疗、休闲、仓储物流等功能，“急时”可转换为人员临时安置和救治、物资应急储存与中转场所，满足应急隔离、临时安置、医疗救治、物资保障等需求。“平急两用”公共基础设施是一种新类型的设施，当前相关专项规划编制工作仍处于探索阶段，为深入贯彻《国务院办公厅关于积极稳步推进超大特大城市“平急两用”公共基础设施建设的指导意见》（国办发〔2023〕24号），落实国家发展和改革委员会、自然资源部、住房和城乡建设部等国家部委相关政策文件要求，在总结各地实践经验的基础上，组织编制本文件，对“平急两用”公共基础设施专项规划的相关基础概念、技术要点、编制流程等进行指导，以提高相关专项规划的科学性、针对性、可操作性。



# “平急两用”公共基础设施专项规划编制指南

## 1 范围

本文件规定了“平急两用”公共基础设施专项规划的一般性规定、主要编制内容、技术要点、实施保障、成果要求等内容，适用于各城市“平急两用”公共基础设施专项规划编制工作。

## 2 规范性引用文件

下列文件中的内容通过文中的规范性引用而构成本文件必不可少的条款。其中，注日期的引用文件，仅该日期对应的版本适用于本文件；不注日期的引用文件，其最新版本（包括所有的修改单）适用于本文件。

- GB 18466-2005 医疗机构水污染物排放标准
- GB 51039-2014 综合医院建筑设计规范
- GB 50849-2014 传染病医院建筑设计规范
- GB 50320-2014 粮食平房仓设计规范
- GB 51143-2015（2021版）防灾避难场所设计规范
- GB/T 35428-2017 医院负压隔离病房环境控制要求
- GB/T 21334-2017 物流园区分类与规划基本要求
- GB/T 51327-2018 城市综合防灾规划标准
- GB/T 40947-2021 安全韧性城市评价指南
- GB 55025-2022 宿舍、旅馆建筑项目规范
- GB/T 44013-2024 应急避难场所 分级及分类
- 建标 107-2008 乡镇卫生院建设标准DK
- 建标 121-2009 救灾物资储备库建设标准
- 建标 163-2013 社区卫生服务中心、站建设标准
- 建标 173-2016 传染病医院建设标准
- 建标 172-2016 粮食仓库建设标准
- 建标106-2021 中医医院建设标准
- 建标110-2021 综合医院建设标准

CJJ\_T189-2014 镇（乡）村仓储用地规划规范

TD/T 1074-2023 城乡公共卫生应急空间规划规范

T/CECS 961-2021 医学隔离观察设施设计标准

T/CECS 661-2020 新型冠状病毒肺炎传染病应急医疗设施设计标准

T/UPSC 0001-2021 应急传染病医院的选址、设计、建设和运行管理导则

T/UPSC 0007-2021 城市防疫专项规划编制导则

### 3 术语和定义

下列术语和定义适用于本文件。

#### 3.1

**平急两用** Used in both Emergency and Normal conditions

在“平时”满足特定日常运营功能的基础上，“急时”可迅速转换，满足隔离、救治、物资配送等应急保障功能。其中，“平时”指日常运营状态，“急时”指自然灾害、事故灾难、公共卫生事件、社会安全事件等城市突发状态。

#### 3.2

**“平急两用”公共基础设施专项规划** Special Plan for Public Infrastructure for Both Normal and Emergency Use

“平急两用”公共基础设施专项规划是对城市一定时期内“平急两用”公共基础设施的应用场景、设施体系、规划目标、配置标准、设施布局、转换利用的综合部署、具体安排和实施管理。

#### 3.3

**“平急两用”公共基础设施** Public Infrastructure for Both Normal and Emergency Use

为应对自然灾害、事故灾难、公共卫生事件、社会安全事件等城市安全风险隐患而体系化设立的公共基础设施，“平时”用作旅游、康养、医疗、休闲、仓储物流等功能，“急时”可转换为人员临时安置和救治、物资应急储存与中转场所，满足应急隔离、临时安置、医疗救治、物资保障等需求，主要包括“平急两用”旅游居住设施、医疗应急服务点、城郊大仓基地、市政配套基础设施以及其他类型“平急两用”公共基础设施。

#### 3.4

**“平急两用”旅游居住设施** Tourist or Residential Infrastructure for Both Normal and Emergency Use

“平时”服务于居民旅游、康养、休闲、居住等需求，“急时”可快速转换隔离居住空间的设施，包括乡村集中连片民宿设施、旅游酒店设施、高速服务区周边旅居集散基地、康养综合体等。

#### 3.5

**“平急两用”医疗应急服务点** Medical Emergency Service Point for Both Normal and Emergency Use



“平时”满足周边居民日常诊疗服务需求，“急时”可快速转换为定点医疗机构，包括监测哨点医院、发热门诊和定点医疗机构（医院）三类。监测哨点医院、发热门诊主要作为信息收集与报送、疾病预警、病例排查、初步治疗等功能的医疗场所；定点医疗机构（医院）主要作为承担患者集中收治任务的医疗救治场所。

### 3.6

#### “平急两用”城郊大仓基地 Large-Scale Suburban Storage Facility for Both Normal and Emergency Use

位于城市城区外围的大型“平急两用”公共物流基础设施，集仓储、分拣、加工、包装、配送等功能于一体，“平时”服务城市生活物资高效中转分拨，“急时”可快速转换为应急物资和生活物资中转调运站、接驳点或分拨场地。

### 3.7

#### “平急两用”市政配套基础设施 Municipal Infrastructure for Both Normal and Emergency Use

专门服务于“平急两用”旅游居住设施、医疗应急服务点、城郊大仓基地等设施的市政配套设施，包括道路、供水、供电、供气、通信设施、污水处理和排水设施、生活垃圾和医疗废物处置设施等，主要为“平急两用”设施运营提供基础支撑。

### 3.8

#### 其他类型“平急两用”公共基础设施 Other Types of Infrastructure for Both Normal and Emergency Use

根据城市实际情况建设的，满足“平急两用”条件与需求的其他类型公共基础设施，包括但不限于公园绿地、体育场馆、学校、展馆等设施。

### 3.9

#### 城市韧性评估 Urban Resilience Assessment

采取一定技术方法，依托城市各部门、多领域基础数据、防灾规划成果，识别、分析城市各类灾害风险，评估城市防灾减灾能力与相关基础设施短板，从而明确“平急两用”公共基础设施体系、应用场景以及选址安全指引的过程。

### 3.10

#### 灾害风险分析 Analysis for Risks of Disaster

采用一定技术方法，识别城市灾害危险类型、频率、规模、成因、影响程度和空间分布特征的过程。

### 3.11

#### 城市防灾减灾能力评估 Assessment on a City's ability to prevent and mitigate disasters

基于城市灾害风险分析，摸查城市防灾设施建设情况，综合评价城市防灾减灾能力与短板的过程。

### 3.12

#### “平急两用”应用场景 Application Scenarios for Both Normal and Emergency Use

根据城市人口、社会经济、自然地理环境等特征以及灾害风险类型而明确的，城市“急时”情况的类型，以及“平急两用”公共基础设施在不同“急时”情况下的用途和功能。

### 3.13

#### “平急两用”功能区 Districts for Both Normal and Emergency Use

以应对城市各类灾害为目的，基于城市人口社会、自然地理、经济活动、防灾设施分布等特征，兼顾行政管理事权划定的、“急时”独立成体系的空间单位。城市在“急时”重点以“平急两用”功能区启用、调配“平急两用”公共基础设施，实施防灾减灾救灾行动。

### 3.14

#### 应急保障通道 Routes of Disaster Preparedness

服务于城市层面“急时”应急救援、物资运输、疏散避难等抢险抗灾行动的高快速路、主次干道及城市支路。

### 3.15

#### 设施启用次序表 Facility Activation Order Table

根据城市应急预案、“平急”转换预案指定的，描述各类“平急两用”公共基础设施重要信息和按需调度启用次序的表格。

### 3.16

#### 区域调度指引 Regional Dispatching Guidelines

面向各类“平急两用”应用场景，结合“平急两用”功能区“平急两用”公共基础设施供需情况分析而制定的，描述“急时”各类应急保障任务调度方向、规模的说明。

### 3.17

#### 三区两通道 Three Districts and Two Paths

“平急两用”公共基础设施在“急时”根据不同人员类别划分的相应区域和通道。“三区”为非管控区、缓冲区、管控区。“两通道”为非管控人员通道、管控人员通道。

## 4 一般性规定

### 4.1 规划定位

“平急两用”公共基础设施专项规划，是城市为应对自然灾害、事故灾难、公共卫生事件、社会安全事件等灾害，对本行政区域内平急功能复合设施、空间进行统筹安排的专项规划，是指导本行政区域内“平急两用”公共基础设施建设、管理、转换的重要依据以及提升城市韧性的重要安排。

### 4.2 规划范围与期限

规划范围宜为行政辖区范围，可结合自然灾害、事故灾难、公共卫生事件、社会安全事件等灾害特征，将城镇开发边界内的范围作为研究重点。规划期限宜与本行政区域国土空间总体规划相衔接，近期宜与国民经济和社会发展规划、国土空间近期建设规划相衔接，主要内容纳入国土空间详细规划。

### 4.3 编制原则

#### 4.3.1 人民至上、生命至上

以满足人民对美好生活的需要为出发点，贯彻落实总体国家安全观，指导推进“平急两用”公共基础设施建设、管理、转换，补齐城市安全韧性和公共服务设施“短板”，提升城市应急防灾能力。

#### 4.3.2 底线思维、极限思维

树立国家总体安全发展观和极限思维，在常住人口规模总量的基础上，统筹考虑城市实际管理服务人口和区域性安全保障的要求，适度提高“平急两用”公共基础设施的储备规模与标准。

#### 4.3.3 依法依规、集约发展

落实城市战略定位和城市应急防灾目标，衔接国土空间规划和相关专项规划，以底线思维为导向，在严守耕地和永久基本农田保护红线、生态保护红线、历史文化保护线、灾害风险控制线等底线约束的基础上，统筹做好“平急两用”公共基础设施空间保障。坚持存量优先，积极盘活城市低效和闲置资源。

#### 4.3.4 城乡融合、功能复合

将城乡作为生命共同体进行治理，结合过往灾害防控经验，综合确定“平急两用”公共基础设施应用场景、类型、规模、功能、空间布局，推动城乡要素平等交换、双向流动，发挥“平急两用”公共基础设施综合使用效能，“平时”服务生产生活，“急时”转换功能、抵御风险，带动乡村成为有效流量空间。依托地方特色产业与空间，指导相关实施主体探索建设多渠道投入、多功能改造、多场景应用、多元化运营的“平急两用”示范工程。

#### 4.3.5 总结经验、稳步推进

规划应充分考虑设施建设现状、地方财政能力以及各区地理区位、旅游资源、交通条件等因素，结合规划编制、实施与管理，推动相关设施在新建、改建、扩建时嵌入“急时”功能，渐进式提升城市应急防灾能力冗余，避免资源浪费，完善规划实施保障机制。

### 5 现状调查与需求分析

#### 5.1 基础情况调查

##### 5.1.1 基础资料收集

##### 5.1.1.1 城市概况数据

城市行政区划、地形地貌、人口和就业规模、气候特征、水文特征、社会经济水平、土地资源、城乡产业布局、公共设施与场地空间等。

##### 5.1.1.2 相关规划及实施评估资料

城市国民经济和社会发展规划、国土空间总体规划、详细规划及医疗卫生、灾害防治、应急管理、防灾减灾、旅游发展、物流仓储、综合交通、市政设施、公共服务设施、产业布局、地下空间、城市绿地系统、应急避难场所建设等相关专项规划成果，以及规划实施评估成果。

##### 5.1.1.3 突发公共卫生事件有关资料

突发公共卫生事件的组织体系和管理机制、应急预案、相关政策和标准，发热门诊、定点医疗机构（医院）、后备定点医疗机构（医院）等建设情况；疫情防控经验总结；其他疫情防控相关基础资料，包括但不限于政策文件、健康指南、医疗信息、旅行建议、检测信息、疫苗资料、统计数据、应急响应计划、心理健康资料、在线资源、物资供应信息、科研进展、国际合作信息及社区支持等。

#### 5.1.1.4 灾害风险资料

自然灾害综合风险普查成果、市域各类灾害历史资料、各类灾害风险评估成果、各类灾害风险区和主要灾害风险控制线划设成果、灾害安置点等资料，以及资源环境承载能力和国土空间开发适宜性评价等基础研究。

#### 5.1.1.5 资源资产调查数据

- a) 旅游业发展趋势报告，旅游市场游客画像数据，主要休闲旅游资源分布等，现状旅游居住设施客房数量及配套设施情况等。
- b) 城市仓储物流市场调研和行业报告，“急时”仓储和物流品类历史需求情况、供应链信息、应急物资储备场地及管理情况等。
- c) 医院、基层医疗卫生机构、专业公共卫生机构等医疗设施的位置、等级、用地面积、床位数、技术人员情况等。
- d) 道路交通、绿地以及通信设施、给水设施、污水处理设施、垃圾和医疗废物处置设施等市政设施的现状及规划规模、等级类型、服务范围、布局等。

### 5.1.2 座谈与访谈

#### 5.1.2.1 座谈访谈对象

开展市、区级发改、卫健、住建、交通、规划、应急管理、城市管理综合执法等政府部门，以及社区代表、专业机构、社会公众座谈访谈。

#### 5.1.2.2 访谈内容与要求

访谈内容包括但不限于各方对“平急两用”公共基础设施的需求及期望；“平急两用”公共基础设施实施的技术可行性、经济可持续性及其解决方案；城市突发事件的应对能力和基础设施的抗风险能力评估；不同部门、组织之间的协作方式及沟通机制。

### 5.1.3 现场调查

#### 5.1.3.1 城市重要灾害风险点调研

对确定的灾害风险点进行实地考察，评估其现状，包括周边环境、设施构造、历史灾害记录等，排查可能导致灾害的风险源，评估次生灾害。

#### 5.1.3.2 城市应急响应设施调研

确认重要的应急响应设施与风险点的相对位置，应急物资储备布局建设及响应机制，分析设施、与物资的可达性和反应时间。考察避难场所可达性，确保其通畅且无障碍物，适合紧急逃生使用。

#### 5.1.3.3 城市市政配套设施进行调研

- a) 应急交通设施调研。实地踏勘应急通道，检查其通畅性、标识是否清晰、维护情况等。检查市内重要的交通枢纽（如高速公路出入口、公共交通站点）在紧急情况下的可用性与疏散能力。
- b) 水、电、气等市政设施调研。调查供水管网、燃气管网的现状以及在紧急情况下的供应能力。评估市政供电系统能力与稳定性，了解应急供电的准备情况。评估应急通讯和网络系统能力与稳定性。
- c) 重要设施的应急响应能力。识别应急指挥中心、临时医疗点、消防设施等重要设施的布局，确保其与主要交通干道、居民区的连接性。检查市政设施设计是否有冗余性，以便在某一设施失效时，其他设施可以支持应急响应。

## 5.2 城市韧性评估

### 5.2.1 灾害风险分析

#### 5.2.1.1 灾害识别

应依托国土空间基础信息平台，整合、梳理全国自然灾害综合风险普查、重大危险源调查、资源环境承载力评价和国土空间开发适宜性评价、年度城市体检等城市各部门、多领域基础数据与防灾规划成果，重点识别城市面临的自然灾害的类型、特征、空间分布；事故灾难的潜在风险因素、发生概率和影响程度、脆弱性、灾难情景；公共卫生事件的法定传染病发生率、疾病模式、传播途径、健康影响、脆弱人群分布、疫苗接种、健康教育和环境卫生；社会安全事件的目标领域定义（犯罪、恐怖主义、社会冲突）、情报收集、趋势和潜在危险、社会安全和影响、情景模拟、经济、社会、文化和政治因素分析等。

#### 5.2.1.2 风险分析

分析各类灾害可能发生的频率与规模，以及灾害的成因、影响程度，确认需要预防的重点灾害种类、防御内容和标准，设定最大灾害效应，并从灾害危险性、人口与经济分布、后果严重程度（包括灾害的链式反应及其后果）、风险控制和减缓能力等方面界定城市各类灾害风险区、主要灾害控制线等范围。

### 5.2.2 城市防灾减灾能力评估

5.2.2.1 城市防灾减灾能力评估应充分衔接城市各类防灾规划，统筹考虑灾害影响和各类防灾要求，对防灾设施资源开展调查和统计，摸清防灾设施的类型、规模、分布情况与状态。

5.2.2.2 城市防灾减灾能力评估应结合城市各部门、多领域基础数据，运用大数据、人工智能等新技术新方法，对城市防灾设施的服务范围、抗灾性能、应急保障和服务能力进行综合评价，找出城市防灾设施在空间布局和基础设施配置等方面的问题和短板。

### 5.2.3 “平急两用”应用场景分析

5.2.3.1 根据城市人口分布、土地资源、产业布局、地理环境、基础设施抗灾能力等特点，从“平疫”“平灾”“平假”“平赛”等“平急两用”应用场景出发，统筹城乡旅居居住设施、城郊大仓、应急医疗服务点等设施布局，完善避难安置、防疫隔离、医疗救援、物资供应等应急保障功能，提高城市应对突发公共事件的能力，增强城市发展韧性。

5.2.3.2 平疫结合。在公共基础设施建设、改造中，预先植入疫情防控的工程要素，疫情来临时，酒店、乡村民宿、新型乡村社区等设施可快速转换为应急隔离设施，有效阻断疫情蔓延。公共卫生体系

需满足日常医疗服务需求，同时具备良好的卫生条件和疾病预防措施，在疫情爆发时，应能迅速转换为隔离区、治疗中心或疫苗接种点，具备隔离和治疗传染病的能力。

5.2.3.3 平灾结合。根据所处地域灾害类型（气象灾害、海洋灾害、洪水灾害、地质灾害、地震灾害等）特点，使公共基础设施具备安置人员、储备基本生活物资等功能和容量，实现灾害来临时功能快速转换。

5.2.3.4 平假结合。指公共设施和交通系统应满足城市日常运营的需求，同时考虑节假日的休闲娱乐需求，提供足够的公共空间和活动设施。在特殊情况下，有能力转变为支持中心，具备提供必要的生活支持和服务的能力。

5.2.3.5 平赛结合。指在公共基础设施建设中，充分考虑举办大型赛事的需要，使其既能保障比赛正常进行，又能不扰乱正常生活生产秩序，也能使其在赛后产生持续效益。

#### 5.2.4 “平急两用”公共基础设施选址安全指引

5.2.4.1 “平急两用”公共基础设施应符合所在城市国土空间规划相关要求，不得与耕地和永久基本农田保护红线、生态保护红线、历史文化保护线、灾害风险控制线等底线相冲突。

5.2.4.2 “平急两用”公共基础设施应避开灾害风险高、用地防灾适宜性差的区域和地段，优先选择灾害风险低、用地防灾适宜性好的区域和区段。工程项目选址应避免因工程建设诱发新的灾害。

### 5.3 设施需求分析

#### 5.3.1 “平急两用”公共基础设施体系构建

5.3.1.1 依托国土调查、地籍调查、不动产登记、资源资产清查等法定数据成果，梳理社区服务设施、公共管理与公共服务设施、商业服务业设施、绿地与开敞空间等符合转换条件的存量空间、潜在资源，明确平急功能复合的设施载体，因地制宜构建“平急两用”公共基础设施体系。

5.3.1.2 以平疫结合的应用场景为基础，结合城市韧性评估结果，研究确认各类“平急两用”公共基础设施的“平时”功能、适宜的“急时”应用场景与功能、服务能级与启用条件。

#### 5.3.2 设施规模测算

##### 5.3.2.1 分级分类测算“急时”需求

综合考虑城市人口规模、城市韧性评估结果，参考相关防灾设施建设标准，面向各类“平急两用”应用场景，对“急时”集中安置与隔离、物资储存与保供、公共卫生应急等需求进行分析。

##### 5.3.2.2 衔接相关规划“平时”需求

充分衔接旅游、仓储物流、医疗、市政等相关专项规划文件，结合城市体检相关结论，分析确认“平急两用”旅游居住设施、医疗应急服务点、城郊大仓基地等设施的“平时”需求规模。

##### 5.3.2.3 匹配分析隔离、医疗、仓储等设施“平急两用”需求

重点围绕城市“急时”设施需求，开展“平急”需求综合匹配分析。对于“急时”需求规模超过“平时”需求规模的情况，溢出部分需求原则上应以预留战略性留白用地和场所，用于“急时”建设防灾设施的方式满足，防止盲目建设造成资源浪费；对于“平时”需求规模大于“急时”的情况，应重点考虑“平急”需求的空间匹配性，以及“急时”各类设施启用可行性、使用便捷性和改造成本等因素，提高“平急转换”的效率。

##### 5.3.2.4 测算“平急两用”市政配套基础设施需求

综合考虑城市人口规模、城市韧性评估结果以及“平急两用”旅游居住设施、医疗应急服务点、城郊大仓基地等设施需求情况，对比城市道路交通、垃圾处理、污水处理、供水、排水等设施供应现状，测算新建、改（扩）建“平急两用”市政配套基础设施需求。

## 6 规划目标与空间布局

### 6.1 平急功能复合规划的目标制定

#### 6.1.1 规划目标制定

结合城市韧性评估，研究提出城市平急功能复合的总体要求，从提升灾害风险预防应对能力出发，合理确定“平急两用”公共基础设施建设、管理的规划目标和要求。其中超大特大城市至2027年具备隔离功能的房源不少于2万间和1万间，疫情监测哨点医院覆盖辖区所有区二级以上医院具备快速扩容发热门诊条件，承担主要救治任务的三级重症监护病区床位比例不低于10%，各地可结合城市实际情况提出适宜指标。

#### 6.1.2 指标体系制定

统筹综合防灾、公共卫生、地下空间、旅居设施、物流体系、市政设施体系等专项规划的目标与指标，结合地方发展阶段和特征，从功能类型、空间结构、建设规模、转换标准等方面，确定“平急两用”公共基础设施建设、管理等方面的量化指标。

### 6.2 设施选址指引

#### 6.2.1 总体原则

6.2.1.1 依法依规。“平急两用”公共基础设施选址应符合城市国土空间总体规划相关要求。

6.2.1.2 安全环保。“平急两用”公共基础设施选址应避开自然灾害易发区，周边环境应具备较高安全稳定性，避免选址在污染严重、社会治安状况不佳的区域，具备建设隔离区（带）的可能性。综合考虑气候、地形、地貌等自然环境因素，确保基础设施在建设和运行过程中对环境的影响最小化。

6.2.1.3 交通便捷。“平急两用”公共基础设施建设应选择交通便捷的区域，易于人员、物资的快速集散，应优先选择靠近主要交通干道或交通枢纽的地点，应具备设置两个及以上独立出入口的条件。重要“平急两用”公共基础设施与主要风险点、交通枢纽之间有不小于两条高效、便捷的干道联系，以提高路网的可靠性。

6.2.1.4 配套完善。“平急两用”公共基础设施宜选择水电供应、通信网络等市政基础设施成熟且具备一定冗余条件或改造空间，不对周边居民日常生活造成影响。

6.2.1.5 节约集约。“平急两用”公共基础设施选址应优先选择城乡存量建筑或低效用地，盘活相关闲置资源。

6.2.1.6 共享共建。应考虑结合“平急两用”公共基础设施选址、建设，引导并鼓励市场主体全过程、实质性、高效率参与“平急两用”公共基础设施建设和运营，使“平急两用”公共基础设施成为城乡融合发展和乡村振兴的重要资源资产。

#### 6.2.2 基本要求

##### 6.2.2.1 新建设施选址基本要求

- a) 符合“平急两用”公共基础设施选址要求的用地包括但不限于医疗卫生用地、旅馆用地、一类物流仓储用地、公园绿地、广场用地、图书、展览设施用地、体育场馆用地等，可结合地

方实际，考虑将农村宅基地纳入选址用地范围，应按照国土空间规划的有关管控要求落实“平急两用”公共基础设施选址，各类“平急两用”公共基础设施之间宜有快速便捷的通道联系。

b) 涉及公共卫生防控的“平急两用”公共基础设施原则上应远离：

- 1) 水源保护区；
- 2) 人口密集区；
- 3) 幼儿园、学校、老年人照护设施等场所；
- 4) 工业污染源和食品和饲料加工生产企业区域；
- 5) 强噪声、振动和强电磁场区域；
- 6) 易燃易爆场所等。

c) “平疫”场景的“平急两用”公共基础设施，应位于地质条件良好、市政配套设施较齐备、交通便利、环境安静、常年洪水位以上地段，与周边建筑之间宜有不小于 20 米的绿化隔离间距，当不具备绿化条件时，其隔离距离不宜小于 30 米；应结合防疫实际需要，综合考虑城市主导风向的影响补充选址条件。服务“平赛”“平假”场景的“平急两用”公共基础设施，须充分考虑赛场、旅游设施与安置服务设施之间的便捷联系。

#### 6.2.2.2 存量改（扩）建设施选址基本要求

a) 存量改（扩）建设施选址在满足第 6.2.2.1 条有关选址要求的基础上，满足以下筛选条件：

- 1) 宜具备一定规模集中室外场地。
- 2) 权属清晰、无争议，不存在查封、冻结等限制情形。
- 3) 取得相关竣工证明并为合法建筑，符合竣工时国家建筑结构、消防、抗震、环保等规范要求。
- 4) 具有完善的给排水、排水、供电、消防给水系统，室外应具备污水处理设施安装场地。
- 5) 服务“平疫”场景的“平急两用”存量设施，需具备屋面高位排放系统或改造后满足高位排放的要求，且各房间空调回风独立处理并设置新风系统，满足减少改造内容、施工方便、快捷等优势。

b) 服务“平疫”场景的“平急两用”存量设施应有多个出入口保证“急时”流线的合理组织，如不具备多个出入口时，也可采取隔断、分流等工程措施，但需满足医学转运要求。

#### 6.2.3 “平急两用”旅游居住设施选址

6.2.3.1 旅游居住设施应独立成区，如与其他非“平急两用”公共基础设施组合建设，或共用出入口、停车场、暖通、排水等，需具备条件改造为独立成区或能够通过采取有效措施保证其独立性。

6.2.3.2 依照国家的指导意见，旅游居住设施宜结合城市关于乡村振兴的有关规划与行动方案，优先在城市山区、郊区进行布局。

6.2.3.3 服务“平疫”场景的旅游居住设施应与入境口岸，传染病医院、定点救治医院等医疗机构有便捷的交通路线。



#### 6.2.4 “平急两用”医疗应急服务点选址

6.2.4.1 医疗应急服务点宜设置在医院、社区卫生中心、乡镇卫生院等医疗设施的独立区域，设置在医院内的医疗应急服务点应与急诊、传染病楼有便捷联系。

6.2.4.2 医疗应急服务点选址应考虑周边是否有足够的医疗资源、物资储备以及人力支持，确保在紧急情况下能够迅速响应和调配资源。

#### 6.2.5 “平急两用”城郊大仓基地选址

6.2.5.1 城郊大仓基地选址宜位于高速路口出入口等交通便捷的城郊区域，结合地方实际情况，可考虑将城郊大仓基地建设在航空、铁路、港口码头周边区域。

6.2.5.2 城郊大仓基地选址应位于地质条件良好、市政配套设施较齐备、交通便利、常年洪水位以上的地段。

#### 6.2.6 “平急两用”市政配套基础设施选址

6.2.6.1 生活垃圾和医疗废物处置设施、污水处理设施与周边设施、场所之间宜设置绿化隔离带。

6.2.6.2 生活垃圾和医疗废物处置设施、污水处理设施应布置于常年主导风向下风向。

### 6.3 规划空间布局

#### 6.3.1 总体要求

结合城乡生活圈规划构建城市健康安全单元和安全基础设施网络，明确适应不同灾种、城乡一体、分级响应的“平急两用”公共基础设施的空间布局方案，构建规模适宜、选址安全、平急功能兼备、空间相对独立的“平急两用”功能组团。

#### 6.3.2 “平急两用”功能区划定

6.3.2.1 “平急两用”功能区应结合城市的人口分布、社会经济、资源禀赋、公共服务设施和基础设施、用地结构、灾害分布与影响等特征，在充分衔接城市的国土空间总体规划、相关专项规划、详细规划并兼顾行政管理事权的基础上，进行分级与划定。

6.3.2.2 针对“平急两用”功能区，需结合“平急两用”应用场景分析，明确其所承担功能、服务人口规模、服务范围等内容，以及“平急两用”公共基础设施配置类型、规模等布局要求，按照分级负责、属地管理的原则，因地制宜形成职责清晰、运转高效的“平急两用”公共基础设施体系。

6.3.2.3 城市应以“平急两用”功能区为基础，建立市、区（县）、街道（镇）、社区（村）多级联动的应急保障与设施管理机制，制定针对各类灾害风险的应急预案，明确“急时”组织体系，以及监测预警、应急响应、后期处置、应急保障等方面的措施。

#### 6.3.3 应急保障通道布局

6.3.3.1 梳理对外联系的交通廊道和可发挥应急救援疏散功能的道路，构建应急救援疏散运输通道网络，保障应急物资供应通道畅通，适度提高生命线工程的冗余度。

6.3.3.2 应考虑主要灾害源及重大危险源分布和区域救援情况，分散设置多个疏散救援出入口，综合利用水、陆、空等交通方式合理设置应急陆路、水路、空中应急保障通道，提出应急通道管控措施和建设要求。

6.3.3.3 结合城市综合交通系统，合理预控陆路的应急保障通道，确保城市应急救援出入口不少于 2 个。其中，大城市不少于 4 个，每个方向至少有 2 个及以上的应急通道，宜与航空、铁路、航运、高等级公路等交通设施连接，形成多通道相互支撑的应急交通走廊。

6.3.3.4 应考虑灾害规模效应和城市组团内部的应急通行，提高救灾干道、疏散主通道的有效宽度设置标准，并宜分别考虑救援和疏散要求分开设置。

6.3.3.5 沿海、沿江河、沿湖的城市还应设置应急码头，建设对外对内水上应急航道，优先保障应急物资运输。

6.3.3.6 鼓励有条件的城市设置应急救援直升机起降场地，预控空中应急救援通道，并结合城市公园、大型体育场地设置物资空投点，创新使用直升机、无人机、电动垂直起降飞行器等低空飞行器，实现城市内部短途运输。

#### 6.3.4 “平急两用”旅游居住设施规划

##### 6.3.4.1 总体要求

坚持因地制宜、因城施策，综合考虑城乡地理区位、旅游资源、交通条件等因素，在充分尊重产权方前提下，盘活利用率不高的集中连片住宅等存量资源、有条件的旅游景区高速沿线服务区周边等空间资源，在新建、扩建或改造时嵌入隔离等功能要求，建设储备一批“平急两用”旅游居住设施，明确布局方向、类型和数量，提出功能配置和建设管理要求。

##### 6.3.4.2 规划布局要求

- a) 结合灾害防控经验和“平急两用”功能区划定情况，分级构建“平急两用”旅游居住设施群。“平急两用”旅游居住设施规划布局应考虑人口分布、城市空间结构、疏散避难空间布局情况，以及与医疗应急服务点、城郊大仓基地等其他类型“平急两用”公共基础设施的空间联系。
- b) “平急两用”乡村集中连片民宿设施优先选取周边具备已开发的旅游资源或者有开发潜力的村庄。根据乡村资源条件，因地制宜布局，突出山、海、林、田、园及建筑等村庄特色，保证“平时”住宿、餐饮、休闲等旅游服务设施不干扰村民正常生产生活，避免“急时”启用隔离功能对周边乡村构成安全隐患。
- c) “平急两用”旅游酒店设施应符合环境保护方面的有关法规和标准。山区新建旅游酒店设施应采用低冲击开发模式，充分利用地形、地貌，依山就势，不对原地貌进行大开挖和深填方。
- d) “平急两用”高速服务区周边旅居集散基地规划布局应结合本地综合交通规划及地方相关规划标准，利用中心城区通往山区县（区）旅游景点高速沿线的服务区资源，优先选择已具备应急服务功能的、周边具有潜力资源的高速公路服务区。结合高速服务区地理区位、资源优势、服务区类型等因素，补足和完善配套服务功能。做好功能分区，保障“急时”转为应急隔离设施后不影响高速服务区的基本交通集散功能。加大对停车场、加油（气）站、充电站等重点区域及食品安全等重点领域安全防范，健全管理制度和应急预案。
- e) “平急两用”旅游居住设施涉及历史文化名村、传统村落的，应符合历史文化名村保护规划和传统村落保护发展规划，新建设施应保持传统格局、历史风貌和空间尺度，不得改变与其相互依存的自然景观和环境，不得损害历史文化遗产的真实性和完整性。

##### 6.3.4.3 功能配置要求

- a) “平急两用”乡村集中连片民宿设施。功能包括隔离、度假、远程办公、餐饮、住宿等，“平时”用作城市近郊旅游居住设施，“急时”转为隔离观察场所，并启用餐饮配送、布草消毒清洗、垃圾污水处理、医疗废物和污水处置等功能。

- b) “平急两用”旅游酒店设施。包括客房、餐饮、娱乐等，结合具体规模可增加会议服务、游览服务等功能。“平时”作为安全、优质、适宜的旅游居住设施，“急时”满足隔离居住功能要求。
- c) “平急两用”高速服务区周边旅居集散基地。集加油、充电、停车、餐饮、住宿、休闲、农产品展销等多功能于一体，“平时”作为旅游集散中心和汽车旅馆，“急时”转为应急隔离设施。

### 6.3.5 “平急两用”医疗应急服务点规划

#### 6.3.5.1 总体要求

通过发挥优质医疗机构的引领作用，推动县级医疗机构及区域次级医疗中心实施基础设施升级与服务能力提升工程。科学规划应急医疗服务站点网络，明确各节点的空间分布、类别划分及数量规模，并制定标准化功能模块配置方案与规范化运营管理细则。强化突发公共卫生事件应急处置水平，构建平急结合的灵活运行机制，“平时”满足周边居民日常诊疗服务需求，“急时”转为定点医疗机构，实现医疗资源在常规诊疗与应急救治场景间的智能化切换，形成分级分类的区域医疗服务保障体系。

#### 6.3.5.2 规划布局要求

- a) 监测哨点医院。整合基层医疗卫生服务体系（社区卫生服务中心/站、乡镇卫生院及村卫生室），通过存量改造与增量建设并行实现监测哨点医疗机构的动态配置。建立分级监测预警机制，形成覆盖城乡的三级传染病监测网络。
- b) 发热门诊。符合资质要求的综合医院（二级及以上）及专科儿童医院需设立标准化发热诊疗专区，并预留应急扩展空间。实施发热门诊网格化布点方案，遵循“一县（区）一单元”原则构建分级诊疗网络，同步建立跨区域协同机制，有效阻断就诊人群非必要流动。
- c) 定点医疗机构。遵循“三重隔离”原则——地理隔离（远离城市核心区与人口聚集区）、环境隔离（规避危险品生产储存区域）、生物隔离（间隔食品加工等特殊产业区），构建“1+N”应急救治体系，每县（区）配置1个标准化传染病救治中心，同步规划预备型定点机构作为战略储备，依据公共卫生风险评估实行动态分级启用机制。

#### 6.3.5.3 功能配置要求

- a) “平急两用”医疗应急服务点在“急时”应依照《医院隔离技术规范》《临时特殊场所卫生防护要求》《传染病医院建筑设计规范》等相关技术规范，按照“三区两通道”进行分区运行使用。
- b) 监测哨点医院应发挥哨点功能，规划配置预检分诊点、发热诊室（门诊）、（临时）隔离点（室）、采样点和转运场所等应急空间，兼具疾病预防控制和“平时”医疗救治职能。监测哨点医院应符合《乡镇卫生院建设标准 DK》（建标 107-2008）和《社区卫生服务中心、站建设标准》（建标 163-2013）相关规定，应急空间占地面积、建筑面积等配置标准应符合《城乡公共卫生应急空间规划规范》附录 F 的规定。
- c) 发热门诊应按照《发热门诊设置管理规范》（联防联控机制医疗发〔2021〕80 号）建设，设置于医疗机构独立区域的独立建筑，标识醒目，具备独立出入口。医院门口、门诊大厅和院区相关区域要设立醒目的指示标识，指示发热门诊方位、行走线路、接诊范围及注意事项等。

- d) 定点医疗机构（医院）和后备定点医疗机构（医院）均宜设置独立的传染病区，执行《综合医院建设标准》（JG 110-2021）、《中医医院建设标准》（JG 106-2021）、《传染病医院建设标准》（JG 173-2016）等标准。

### 6.3.6 “平急两用”城郊大仓基地规划

#### 6.3.6.1 总体要求

构建“平急两用”战略物资储备体系。科学规划城郊大仓基地的布局、类型和数量，制定模块化功能配置标准及平急转换技术规范。推动储备基地与国家级物流枢纽、区域分拨中心等物流骨干网络实现设施互联与信息共享，打造“干线-支线-终端”三级物资调配通道，同步研发智能调度算法模型，实现常规保障与应急响应场景下的物资精准匹配与动态路线优化。

#### 6.3.6.2 规划布局要求

- a) “平急两用”城郊大仓基地需与已规划的大型综合物流园区、分拨中心及批发市场等物流节点网络相衔接，依据城市空间布局及人口分布，划分应急仓储物流配送区域及物资保障区域。
- b) “平急两用”城郊大仓基地应根据不同应急物资的存储需求及仓储物流节点的服务覆盖范围，综合考虑设施选址、布局及规模评估，合理决定新建设施或在现有基础上改扩建。
- c) 强化数据分析能力，识别在重大疫情及突发公共事件中起关键作用的仓储物流基础设施，整合应急物资的仓储与配送中心功能，明确城郊大仓基地的物流通道连接。
- d) “平急两用”城郊大仓基地应选址于交通便捷区域，以确保货物的高效接收与分发。
- e) “平急两用”城郊大仓基地应规划于城市外围，连片集中分布，具备优越的交通运输和仓储配送条件，以保障在紧急情况下能迅速完成生活物资的应急调运、分拣及配送。具体布局原则包括：
  - 1) 确保与高速公路出入口的有效连接。
  - 2) 优先考虑靠近铁路、机场、港口等主要交通枢纽，以及国家骨干冷链物流基地、国家物流枢纽、国家级示范物流园区、大型物流园区及分拨配送中心等物流设施。
  - 3) 优先布局于大型批发市场、企业商品仓库等商贸设施及生活物资生产工厂附近。
  - 4) 避免选址于危险品仓储设施周边、地质灾害频发区、矿产开采区、采空区、能源走廊、生态敏感区及水源保护区等不适宜建设区域。
  - 5) 对于合作共建的城郊仓储基地，可根据实际情况在城市群或都市圈范围内进行布局，并进行风险评估，根据项目类型及规模开展环境影响评价、交通影响评价及能源技术评价等。

#### 6.3.6.3 功能配置要求

- a) 科学规划仓储基地功能区划，设置独立设置的物资接收、发运及行政管理功能区。
- b) 仓储基地内部构建灵活高效的作业动线，实现物资流转全流程的便捷操作。
- c) 统筹“平时”、“急时”物流通道，健全功能区配置体系，确保“急时”具备独立物资暂存区、装卸作业场、运输通道及应急指挥场所。
- d) 基于物资品类特性、规格参数及流通需求，配置基础仓储、集散中转、战略储备功能，同时强化农副产品存储、冷链生鲜、医药物资冷藏等专业化仓储模块，完善功能性配套体系。

- e) 依据“平时”与“急时”物资特性及仓储环境标准，配置温湿度调节及空气循环系统，确保不同物资的适宜储存环境参数。
- f) 强化城郊大仓基地的防灾冗余设计，在建设指标中预留适当的弹性储备空间。
- g) 基地建设应配置双回路供电系统及应急水源，确保多向交通疏散通道，规划自动化运输设备及货柜车辆专用作业区，部署高可靠通信网络，同步建设节能照明、光伏发电、中水回用等绿色基础设施。
- h) 推行智能化仓储管理系统，运用物联网及大数据技术实现物资动态监测。建立分级预警机制与应急补货体系，开发物资追踪溯源及智能调度平台。构建运营模式快速切换机制，实现常规与应急仓储方案的无缝衔接。

### 6.3.7 “平急两用”市政配套基础设施规划

#### 6.3.7.1 道路设施

- a) 布局要求。宜统筹建设“平急两用”公共基础设施内部与外部的道路，形成衔接高效、安全韧性的配套道路体系。
- b) 空间要求。配套道路以“平急两用”公共基础设施周边高速公路，一级公路，快速路以及主干路为骨架，以其他道路为连接线布局，提升“平急两用”公共基础设施与城市路网的连通能力。
- c) 技术指标要求。“平急两用”配套道路不宜设置单一通道，宜设有备用通道，优先选用沿线桥梁少、隧道少的道路，限高及限宽标准、抗灾设防能力和重要节点连通方式应充分保障“平时”旅游与生产生活需求、“急时”物资运输与人员转运需求，满足《城市综合防灾规划标准》（GB/T51327）中相关规定。
- d) 特殊设计。“平急两用”道路应满足快速通行和安全使用要求，特别是大型客车、大型物流车辆及其他特需车辆的通行要求。

#### 6.3.7.2 供水设施

应构建多源互补的供水格局，建设应急和备用水源，在平急转换时，供水设施应确保实现备用水源和应急水源的快速切换。超大特大城市应提高供水系统的设防要求，供水工程的防洪及排涝标准应高于所在城市设防标准。水厂净化处理工艺应考虑极端情况，输配水管材管径应根据使用场景适当提高建设标准，优先采用柔性接口进行管道连接。水厂、建筑小区加压调蓄设施等重点工程应强化双线路用电保障和设施安全防范要求，避免因设备进水、供电中断导致生产中断。“平急两用”公共基础设施应配置具有取水、净水和检测功能的应急供水装备，以便应对突发情况下的基本用水需求。具有隔离功能的旅游居住设施、医疗应急服务点的供水系统，应当根据功能需要，分区独立运行。

#### 6.3.7.3 供电设施

“平急两用”公共基础设施应明确应急电源、变电站、输配电线路的布局。应急供电设施应采用双重电源或双回路供电，并配置应急电源系统，确保双重电源的任一电源及双回路的任一回路均可独立工作，并应满足正常用电负荷需求。

#### 6.3.7.4 供气设施

“平急两用”公共基础设施应结合城市能源结构、资源状况和气源条件，预测应急用气负荷，合理选择应急气源，明确应急燃气厂站布局、管网布置、调峰和应急储备设施布局，应急燃气管网应布置成环，保证供气不间断。

### 6.3.7.5 通信设施

“平急两用”公共基础设施及周边地区的广电设施、通信基站、通信机楼、通信枢纽、通信线路、宽带网络、微波通道等通信设施应与各级应急指挥系统保持互联互通，整合公安、消防、地震、防汛、市政、气象、防疫等应急指挥专用通信平台，协调共享应急通信专线和数据通道等资源，保障“平急两用”公共基础设施通信服务全覆盖。

### 6.3.7.6 污水处理和排水设施

- a) “平急两用”公共基础设施及周边应采用雨污分流排水体制，设计预留污水排放、雨水蓄滞等空间，配套建设雨水抽排泵站和设备，为污水处理站预留水、电等接入条件和场地。具有隔离功能的旅游居住设施、医疗应急服务点的排水系统应当根据应急场景进行分区设计，“急时”实现快速分区，清洁区与污染区的排水系统应相互独立不串接。排水管网、调节池、提升泵站、消毒和处理设施等应实现在“急时”状态下产生的污水全收集、全处理、全过程控制。
- b) 完善定点医疗机构（医院）、后备定点医疗机构（医院）排水管网建设，独立建设公共卫生污（雨）水处理站。疫情监测哨点医院配套建设排水管网和临时性污水处理罐（箱），确保污水不直接排入环境。“平急两用”公共基础设施下游无污水处理厂时，就近设置污水处理系统，水质满足国家或地方有关要求后方可排放。

### 6.3.7.7 生活垃圾和医疗废物处置设施

- a) 生活垃圾应急处理设施应具备必要的防护和隔离条件，符合消杀防疫设计要求。医疗废物的收集、消毒、包装、贮存、运输、处置等设施应满足医疗废物全过程控制需要。
- b) “平急两用”公共基础设施应设置或者预留生活垃圾收集转运设施及场地，确保“急时”相关设施设备可快速安装投入使用。按照永久临时结合、常态备用的原则，预留市级和区级医疗废物处置中心用地。疫情情况下，医疗垃圾由规划医疗废物处置中心处理。若规划医疗废物处置中心难以满足处理需求时，需根据疫情防控需要，启动市级应急医疗废物处置中心或区级应急医疗废物处置中心建设，或将部分生活垃圾焚烧厂（或焚烧炉）改造为医疗废物处置设施进行应急处置。定点医疗机构（医院）、后备定点医疗机构（医院）的医疗废物和受污染的生活垃圾运至医疗废物处置中心集中处置。疫情监测哨点医院的医疗废物和受污染的生活垃圾运至医疗废物处置中心或通过其他高温热处置设施集中处置。

### 6.3.8 其他类型“平急两用”公共基础设施规划

#### 6.3.8.1 总体要求

以极限思维与弹性思维为导向，结合城市韧性评估与“平急两用”公共基础设施需求分析情况，根据国家、省、市有关标准规范和指引，将具备“急时”改造条件的体育场馆、展览中心、应急医疗、大型文化教育设施等设施，以及公园、广场、露营地等公共开敞空间纳入“平急两用”公共基础设施体系中，作为“平急两用”旅游居住设施、医疗应急服务点、城郊大仓基地等设施的补充。以其他类型“平急两用”公共基础设施作为全灾种应对设施的备用改造场所，明确设施不同“急时”状态下改造方向、功能与建设管理要求，参考应急避难、综合防灾等空间场所要求深化完善空间场所，适度预留设施安全冗余。

#### 6.3.8.2 规划布局要求

其他类型“平急两用”公共基础设施应依照“平急两用”功能区划定情况，在考虑人口规模和密度分布的基础上，按照一定服务半径进行布局。其他类型“平急两用”公共基础设施应优先考虑公园绿地、广场、大型公共建筑、大型文化教育设施等公共设施资源，以便于管理和按需及时启用。

### 6.3.8.3 功能配置要求

其他类型“平急两用”公共基础设施应结合城市灾害防控需要，作为对“平急两用”旅游居住设施、医疗应急服务点、城郊大仓基地等设施的补充，确保“急时”改造后可满足集中安置与隔离、物资储存、医疗救治等需求中某一项或多项的需求。

## 7 实施保障与平急转换指引

### 7.1 近期实施规划

衔接国民经济和社会发展规划五年规划与国土空间总体规划，结合现状调查中的城市韧性评估，对规划近期做出统筹安排，制定近期实施规划。编制旅游居住设施、医疗应急服务点、城郊大仓基地、市政配套基础设施以及其他类型“平急两用”公共基础设施等重大项目清单，提出实施支撑政策。

#### 7.1.1 制定近期建设目标

##### 7.1.1.1 总体目标

通过开展“平急两用”公共基础设施专项规划，科学谋划、解决“平急两用”公共基础设施“建多少、在哪建、怎么建、用什么地、如何配套、如何管理”等问题，为城市用于应急隔离、临时安置、物资保障、医疗救治等功能的各类“平急两用”公共基础设施提供空间保障与建设、使用指引，推动实现“平急两用”公共基础设施的快速转换和高效利用，提升城市应对自然灾害、新发重大疫情、突发公共事件的能力，增强城市的安全韧性。

##### 7.1.1.2 具体指标

确定“平急两用”公共基础设施近期建设数量、布局和覆盖范围，设定应急响应时间、救援效率等量化指标。

#### 7.1.2 提出近期建设安排建议

围绕总体目标和具体指标，确定近期建设的重点任务和项目。优先选择对城市发展影响大、群众需求迫切、实施条件成熟的项目作为建设重点。

##### 7.1.2.1 时间安排

明确各项建设任务的起止时间，制定详细的时间表，确保各项任务按时推进。对于关键节点和里程碑事件，要设定明确的完成时间和验收标准。

##### 7.1.2.2 资源配置

合理配置人力、物力、财力等资源，确保各项建设任务得到有效保障。加强资金监管和使用效率，确保资金安全和使用效益最大化。

##### 7.1.2.3 责任分工

明确各相关部门和单位的职责分工，确保各项建设任务有人负责、有人落实。建立跨部门协调机制，加强信息共享和协同作战能力。

## 7.2 平急转换指引

为保障“平急两用”公共基础设施“急时”可迅速转换使用，应构建统一指挥、专常兼备的应急指挥体系，完善相关部门协同联动、各司其职的平急转换和急时管理机制。

### 7.2.1 平急转换要求

#### 7.2.1.1 明确设施启用条件与管理运营要求

研究提出各类“平急两用”公共基础设施的“急时”启用条件，明确各设施在“平时转急时”和“急时”阶段组织管理、转换演练、日常维护、场所管理、工作人员管理、物资管理等方面的要求，建立和完善“平急结合、功能转换、协同反应”的管理机制。

#### 7.2.1.2 提出平急转换方案编制要求

对各类“平急两用”公共基础设施，结合相关设计指引与标准规范，提出在各“平急两用”应用场景下，“平时转急时”设计方案、实施方案和“急时”运行方案编制要求，指导相关责任单位完善“平急两用”公共基础设施的平急转换实施内容、施工预算和时间计划、“急时”管理运行方式，为后续“平急两用”公共基础设施的高效启用提供指引。

#### 7.2.1.3 明确建设验收要求

研究提出各类“平急两用”公共基础设施在不同“平急两用”应用场景下“急时”改造验收条件、责任主体以及组织方式。

#### 7.2.1.4 明确设施平急转换要求

- a) “平急两用”旅游居住设施“急时”人流和物流宜分别设置出入口，隔离区内应设置污物清运电梯、工作人员使用的房间或工作站。隔离用房“急时”应采取措施防止隔离人员之间相互接触，“平时”送、排风系统应满足或改造后满足“急时”过滤消毒和压差要求。每间隔离用房应独立设置卫生间，卫生间排风宜采取集中排风，保持室内排风管道均处于负压状态。
- b) “平急两用”医疗应急服务点“急时”清洁区、污染区应各自成一区，给水系统宜各自独立设置。向污染区供水的给水道上应设置减压型倒流防止器，倒流防止器应设置在清洁区。污染区给水管与卫生器具及设备连接应设置空气隔断或者倒流防止器，不应直接相连，给水主管入口宜设置消毒剂投加接口，并配置消毒剂投加设备和计量设备。污染区内应设置污物清运电梯，并与垃圾收集设施连接便捷。清洁区、潜在污染区、污染区的机械通风和空调系统应按区域独立设置。定点医疗机构（医院）重症监护床位含可转换的重症监护床位，不应小于医院编制床位总数的10%，重症监护病区内宜设置1-2间负压隔离病房。
- c) “平急两用”城郊大仓基地“急时”缓冲区应设置货车甩挂、司机交换场地、车辆消杀及检验检疫的区域。对于“急时”状态时有车辆消毒杀菌需求的，应设置独立的车辆洗消管道系统，并设置防水质污染措施。冲洗废水需经消毒处理达标后方可排入市政污水管网。“急时”存储非危险品的物流仓应采用自然通风或通风量不小于2次/h的机械通风措施；药品存储间应根据温湿度需求设置空调系统，低温药品库可采用阴凉库空调。更衣间与本地控制室宜预留双向对讲系统安装条件。



- d) “平急两用”市政配套基础设施方面，“平急两用”公共基础设施的专用支线道路，在“急时”应设置路障或隔离设施。明确“急时”服务于“平急两用”公共基础设施的独立的垃圾收集设施。“急时”污、废水应消毒后排放。“急时”使用的污水处理设施、消毒池与化粪池等应封闭，废气应集中收集和消毒，相应通气管应引至人员稀少处或通至屋面。
- e) 其他类型“平急两用”公共基础设施应明确“急时”明确改造方向与功能配置，包括但不限于医疗保障、隔离、仓储等功能，参考《方舱医院设计导则（试行）》（国卫办规划函〔2022〕254号）、《新冠肺炎应急救治设施负压病区建筑技术导则（试行）》（国卫办规划函〔2020〕166号）、《医学隔离观察临时设施设计导则（试行）》（国卫办规划函〔2021〕261号）等指引文件实施平急转换。

## 7.2.2 设施启用次序

### 7.2.2.1 制定设施储备清单

建立“平急两用”公共基础设施台账与一张图，明确各设施“急时”的层级、管理责任主体、主要功能、服务能级、服务范围、平急转换时限等内容。

### 7.2.2.2 建立梯次启用机制

结合“平急两用”公共基础设施应急服务能级、交通可达性、平急转换效率等条件，制定“平急两用”公共基础设施启用次序表，明确各设施启用时限。

## 7.2.3 区域调度指引

### 7.2.3.1 构建应急指挥调度体系

面向各类“平急两用”应用场景，明确各类灾害防控组织体系的建设要求，指导属地政府构建统筹全面、统一指挥、专常兼备、反应灵敏、上下联动的应急指挥体系。

### 7.2.3.2 明确城市内部区域调度方向与内容

结合人口规模与空间分布、“平急两用”公共基础设施规划储备情况，以区（县）、街道（镇）为基本单元，分析属地内各类“平急两用”公共基础设施的供需对比情况，针对各“平急两用”应用场景，明确“急时”各基本单元所需承担外溢和需对外转移的应急保障任务、对应“平急两用”公共基础设施启用清单与次序、各单元间的对口调度方向。

## 7.3 规划实施保障措施

### 7.3.1 资金保障

完善“平急两用”公共基础设施资金保障措施，引导和鼓励市场主体积极参与“平急两用”设施建设和利用，灵活运用财政资金、超长期特别国债、地方政府专项债券、基金、企业债券、信贷、融资租赁等财政和金融工具。

### 7.3.2 规划衔接与实施

制定“平急两用”公共基础设施规划与国土空间总体规划、详细规划以及专项规划的衔接建议，确保“平急两用”公共基础设施布局符合国土空间规划要求。明确规划实施评估与监管要求，对照国土空间规划“一张图”信息系统和“平急两用”公共基础设施管理信息平台（如有），持续优化和调整相关设施布局。

### 7.3.3 土地利用

依照国家、省、市的相关支持政策以及国土空间规划和用途管制要求，完善“平急两用”公共基础设施项目前期策划的支撑措施，指导规划部门参与项目选址选线工作，重点关注红线底线要素，在规划设计条件、国有建设用地划拨决定书或国有建设用地使用权出让合同等规划、用地文件中，明确项目的“平急”功能转换要求。研究提出“平急两用”公共基础设施建设用地保障、项目审批管理等方面的建议。

### 7.3.4 设施管理

构建统筹全面、统一指挥、专常兼备、反应灵敏、上下联动的应急指挥体系，对各类“平急两用”公共基础设施实施台账式管理。指导相关责任单位制定“平急两用”公共基础设施平急转换方案，明确启用条件、平急转换方式和“急时”运转模式，完善运行管理、人员队伍、物资储备、信息数据等规章制度。统筹考虑城市食物供应体系，建立粮食、医药产品等重要商品储备制度，提升城市食物供应链韧性。

## 8 成果要求

### 8.1 规划成果构成和形式

#### 8.1.1 制定近期建设目标

##### 8.1.1.1 成果构成

规划成果由规划文本、规划图件、数据库和规划附件组成。

#### 8.1.2 成果形式

8.1.2.1 规划成果形式为纸质文档和电子文档。

8.1.2.2 纸质文档采用 A4 幅面竖开本装订，其中，规划图集宜采用 A3 幅面印制并折页装订，与规划文本、附表合并装订成册。

8.1.2.3 电子文档采用通用的文件存储格式，其中，文本可采用 PPT、DOC、PDF 等文本格式或图形格式，图纸文件应采用 JPEG、PSD、CAD、GIS 等矢量文件格式存储，数据成果矢量数据采用 GDB、SHP 格式。

### 8.2 规划文本

#### 8.2.1 文本内容

规划文本内容一般包括总则、工作基础、规划目标、选址与建设指引、“平急两用”公共基础设施总体空间布局、“平急两用”旅游居住设施规划、“平急两用”医疗应急服务点规划、“平急两用”城郊大仓基地规划、“平急两用”市政配套设施规划、实施保障措施等。

#### 8.2.2 表述要求

8.2.2.1 规划文本应以章节体表述规划结论，内容准确规范，明确简练，具有指导性和可操作性。

8.2.2.2 强制性规划内容应采用与其他规划内容有明显区别的字体或格式进行表述。

### 8.3 规划图件

### 8.3.1 图件内容

规划图件一般包括但不限于以下内容：

- a) 现状用地资源分布图
- b) “平急两用”公共基础设施综合限制要素分析图
- c) 具备“平急两用”潜力的旅游居住设施现状分布图
- d) 具备“平急两用”潜力的医疗设施现状分布图
- e) 具备“平急两用”潜力的大型仓储基地现状分布图
- f) 具备“平急两用”潜力的市政配套基础设施现状分布图
- g) 具备“平急两用”潜力的其他类型公共设施现状分布图
- h) “平急两用”公共基础设施总体布局规划图
- i) “平急两用”旅游居住设施规划布局图
- j) “平急两用”医疗应急服务点规划布局图
- k) “平急两用”城郊大仓基地规划布局图
- l) “平急两用”市政配套基础设施规划布局图
- m) 其他类型“平急两用”公共基础设施规划布局图
- n) 其他相关分析图

### 8.3.2 绘制要求

- 8.3.2.1 规划图纸所表达的内容应清晰、准确，与规划文本内容相符，保持图数一致。
- 8.3.2.2 现状图、规划图和分析图应保持图例一致。
- 8.3.2.3 规划图集应按现状图、规划图、分析图的顺序排列。
- 8.3.2.4 规划图纸比例一般采用：大中城市为 1/10000~1/25000，小城市为 1/5000~1/10000。

## 8.4 数据库

### 8.4.1 数据内容

提交符合数据汇交要求的电子成果数据，包括规划文本、规划说明、专题研究报告、栅格文件、规划表格、矢量数据和数据说明文档等。

### 8.4.2 数据坐标系

规划图件、矢量数据、栅格文件等涉及平面坐标的成果，应采用“2000国家大地坐标系”。

### 8.4.3 数据管理要求

数据库建设应与规划编制工作同步推进，并及时纳入国土空间基础信息平台 and “一张图”实施监督系统。

## 8.5 规划附件

### 8.5.1 规划说明书

- 8.5.1.1 规划说明书应由正文和附件两部分组成。
- 8.5.1.2 正文应与规划文本的条文相对应，对规划文本条文做出详细说明。
- 8.5.1.3 附件应主要包括现状分析评价报告、其他专题研究报告、相关部门建议以及公众意见。

### 8.5.2 专题研究报告

可针对“平急两用”公共基础设施建设设施需求评估、“平急两用”公共基础设施建设应用场景研究、国内外标杆城市案例研究、“平急两用”公共基础设施用地保障政策研究、“平急两用”公共基础设施全生命周期管理研究等重大专题开展研究，形成专题研究报告。

### 8.5.3 基础资料汇编

基础资料汇编应包括规划涉及的相关基础资料、参考资料、相关地方标准规范、相关政策文件说明、会议纪要、专家审查意见、部门及地方意见等。

## 附录 A

## (规范性)

## “平急两用”公共基础设施专项规划推荐指标

## A.1 概述

“平急两用”公共基础设施建设是提升城市安全韧性的重要举措，建议结合城市应对新冠疫情、自然灾害、安全事故等灾害的经验，重点围绕应急隔离、应急医疗、物资保障等维度，设置相关指标。

## A.2 推荐指标体系

各城市可在推荐指标的基础上，结合本地发展阶段，构建符合地方实际的指标体系。

表 A.1 “平急两用”公共基础设施专项规划推荐指标一览表

| 维度   | 序号 | 指标项                                        | 指标内涵                                                        |
|------|----|--------------------------------------------|-------------------------------------------------------------|
| 应急隔离 | 1  | “平急两用”旅游居住设施隔离房源数（间）                       | “平急两用”旅游居住设施中可用于应急隔离、隔离医学观察的房间数量。                           |
|      | 2  | “平急两用”旅游居住设施可承载隔离人员规模（人）                   | “平急两用”旅游居住设施中可承接应急隔离、隔离医学观察人员的最大数量。                         |
|      | 3  | 可临时征用的城市大型公共建筑面积（万平方米）                     | 辖区内会展中心、体育馆等大型公共建筑中能够快速响应及转换为临时隔离设施的建筑面积。                   |
|      | 4  | 可临时征用的城市大型公共建筑可承载最大人员规模数（万人）               | 辖区内具备“平急两用”条件的会展中心、体育馆等大型公共建筑完成平急转换后可承接应急隔离、隔离医学观察人员的最大数量。  |
| 应急医疗 | 5  | 承担主要救治任务的三级医院重症监护病区（ICU）床位数占医院编制床位总数的比例（%） | 辖区内“急时”承担主要救治任务的三级医院中，重症监护病区（ICU）床位数占该医院编制床位总数的比例。          |
|      | 6  | 疫情监测哨点医院覆盖率（%）                             | 具有首诊信息收集与报送、不明原因性疾病预警功能的医疗应急服务点服务区域覆盖建设用地面积占辖区建设用地总面积的比例。   |
|      | 7  | 城市二级及以上医院覆盖率（%）                            | 辖区内二级及以上医院4公里（公交15分钟可达）服务半径覆盖的建设用地面积占辖区内建设用地面积的比例。          |
|      | 8  | 具备快速扩容发热门诊条件的二级及以上医院（含二级）占比（%）             | 辖区内具备快速扩容发热门诊条件的二级及以上医院数量占辖区内二级及以上医院数量的比例。                  |
|      | 9  | 镇卫生院和社区卫生服务中心设置发热门诊（诊室）的比例（%）              | 辖区内设置发热门诊（诊室）的镇卫生院和社区卫生服务中心数量占镇卫生院和社区卫生服务中心数量的比例。           |
|      | 10 | 每千常住人口医疗机构床位数（张）                           | 辖区内医疗卫生机构床位数/辖区内常住人口数×1000。                                 |
| 物资保障 | 11 | “平急两用”城郊大仓基地用地面积（亩）                        | 辖区内建成“平急两用”城郊大仓基地的用地规模。                                     |
|      | 12 | “平急两用”城郊大仓基地应急仓储面积（万平方米）                   | 辖区内“平急两用”城郊大仓基地中专门用于储存和保管重要生活物资、农产品、救灾物资、救援设备、医疗用品等物资的建筑面积。 |
|      | 13 | 城市粮食储备规模（万吨）                               | 城市政府或相关机构为应对可能的粮食短缺、自然灾害或其他紧急情况而预先储存的粮食总量。                  |
|      | 14 | 生活必需品交易备用场地数量（个）                           | 辖区内为应对紧急情况而专门设立的用于储存、中转和交易生活必需品的场地数量。                       |
|      | 15 | 生活必需品应急投放网络覆盖率（%）                          | 辖区内生活必需品应急储备库、运输系统、投放点可覆盖的建设用地面积占辖区建设用地总面积的比例。              |
|      | 16 | 生活物资临时转运接驳站数量（个）                           | 辖区内“急时”用于生活物资的临时储存、中转和交接的场所数量。                              |

附录 B  
(规范性)

“平急两用”公共基础设施专项规划土地利用相关保障措施建议

B.1 概述

结合国务院、相关部委政策文件，以及有关省、市的实践经验，梳理、总结“平急两用”公共基础设施在土地利用方面的实施保障措施建议。

B.2 土地利用相关的规划实施保障措施建议

各城市参考以下清单，制定、完善“平急两用”公共基础设施专项规划实施保障措施。

表 B.1 “平急两用”公共基础设施专项规划土地利用相关保障措施建议

| 土地利用相关保障措施 | 序号 | 具体建议                                                                                                                                       |
|------------|----|--------------------------------------------------------------------------------------------------------------------------------------------|
| 优化规划管理许可   | 1  | 完善“平急两用”公共基础设施项目前期策划的支撑机制，依据国土空间规划和用途管制要求，指导规划部门积极参与项目选址选线工作，重点关注红线底线要素并提出建设性意见。                                                           |
|            | 2  | 在规划设计条件、国有建设用地划拨决定书或国有建设用地使用权出让合同等规划、用地文件中，明确项目的“平急”功能转换要求，以及不动产相关权利限制事项。                                                                  |
|            | 3  | 探索制定规划许可豁免清单并完善监管机制，支持“平急”功能快速转换，以及应急状态下先行使用土地或者使用临时用地。                                                                                    |
| 明确建设用地保障方式 | 4  | 依照国家、省、市的相关支持政策，按照“项目跟着规划走，土地要素跟着项目走”的要求，明确“平急两用”公共基础设施建设用地保障的方式，包括但不限于优先保障用地计划、优化建设项目用地报批，以及将城镇开发边界外的“平急两用”公共基础设施优化纳入城镇开发边界后，按照批次用地实施征收等。 |
| 完善审批管理机制   | 5  | 根据自然资源部颁布的规划许可管理办法，以及各城市法律法规、政策文件要求，对于划拨用地的“平急两用”公共基础设施项目，鼓励实行减环节。                                                                         |
|            | 6  | 根据自然资源部颁布的规划许可管理办法，以及各城市法律法规、政策文件要求，对于出让用地的“平急两用”公共基础设施项目，鼓励建设用地规划许可证采用免申即领。                                                               |
|            | 7  | 根据自然资源部颁布的规划许可管理办法，以及各城市法律法规、政策文件要求，依托“多规合一”业务协同平台，开展项目联审，对符合条件的相关项目，实施“告知承诺制”审批，实行“多证齐发”。                                                 |
| 其他措施       | 8  | 支持降低用地成本，包括但不限于合理确定土地使用年限和出让底价，鼓励利用存量低效土地，支持分期缴纳土地价款等。                                                                                     |
|            | 9  | 支持使用集体建设用地，如支持采取入股、联营等方式使用集体建设用地。                                                                                                          |
|            | 10 | 按国家部署开展农村集体经营性建设用地入市的地区，鼓励采取出让、出租等方式使用农村集体建设用地。                                                                                            |
|            | 11 | 鼓励与村集体共建“平急两用”公共基础设施项目。                                                                                                                    |

## 参 考 文 献

- [1] 中华人民共和国城乡规划法
- [2] 中华人民共和国土地管理法
- [3] 中华人民共和国突发事件应对法
- [4] 国务院应对新冠肺炎疫情联防联控机制综合组关于印发大型隔离场所建设管理卫生防疫指南（试行）的通知（联防联控机制〔2021〕132号）
- [5] 卫生健康委办公厅 发展改革委办公厅关于印发综合医院“平疫结合”可转换病区建筑技术导则（试行）（国卫办规划函〔2020〕663号）
- [6] 国务院办公厅关于积极稳步推进超大特大城市“平急两用”公共基础设施建设的指导意见（国办发〔2023〕24号）
- [7] 自然资源部办公厅关于统筹做好“平急两用”公共基础设施国土空间规划和用地保障工作的通知（自然资办函〔2023〕1592号）
- [8] 城郊大仓基地建设实施方案（发改经贸〔2023〕1813号）
- [9] 国家卫生健康委关于印发贯彻落实《国务院办公厅关于积极稳步推进超大特大城市“平急两用”公共基础设施建设的指导意见》实施方案的通知（国卫规划发〔2023〕32号）
- [10] 交通运输部贯彻落实《国务院办公厅关于积极稳步推进超大特大城市“平急两用”公共基础设施建设的指导意见》的实施方案（交办规划〔2023〕53号）
- [11] 住房和城乡建设部办公厅关于加强“平急两用”公共基础设施配套市政建设管理的意见（建办城〔2023〕39号）
- [12] 住房和城乡建设部贯彻落实《国务院办公厅关于积极稳步推进超大特大城市“平急两用”公共基础设施建设的指导意见》的实施方案（建质〔2023〕59号）
- [13] “平急两用”公共基础设施建设专项规划编制技术指南（试行，建办质〔2023〕43号）
- [14] 平急功能复合的韧性城市规划与土地政策指引（自然资办发〔2024〕19号）
- [15] 广东省“平急两用”公共基础设施建设设计指引（试行，粤建市〔2024〕160号）
- [16] 广东省“平急两用”公共基础设施配套市政设施建设管理实施方案（粤建城〔2024〕63号）
- [17] 浙江省医疗应急服务点“平急两用”技术导则（试行，公告〔2024〕13号）
