# Supplementary material
Source: Research Square preprint supplement (doi:10.21203/rs.3.rs-9461961/v1)
Supplement: Supplementary file 6 [file 团体标准《“平急两用”公共基础设施专项规划编制指南(征求意见稿)》编制说明.pdf › Supplementary materias/团体标准《“平急两用”公共基础设施专项规划编制指南(征求意见稿)》编制说明.pdf]

“平急两用”公共基础设施专项规划  
编制指南编制说明  
(征求意见稿)

《“平急两用”公共基础设施专项规划编制指南》编制团队

二〇二五年四月

## 目 次

|                                              |    |
|----------------------------------------------|----|
| 一、工作简况 .....                                 | 1  |
| (一) 背景与任务来源 .....                            | 1  |
| (二) 目的意义 .....                               | 2  |
| (三) 主要工作过程 .....                             | 3  |
| (四) 参与单位与主要起草人 .....                         | 4  |
| 二、《指南》编制原则和确认主要内容的依据 .....                   | 4  |
| (一) 编制原则 .....                               | 4  |
| (二) 确定《指南》主要内容的依据 .....                      | 5  |
| 三、主要试验(或验证)的分析、综述报告、技术经济论证，预期的经济效益 .....     | 6  |
| (一) 《指南》主要内容 .....                           | 7  |
| (二) 重要问题说明 .....                             | 8  |
| (三) 预期效果 .....                               | 9  |
| 四、采用国际标准和国外先进标准的程度，以及与国际、国外同类标准水平的对比情况 ..... | 9  |
| (一) 相关理论基础与韧性城市评估方面 .....                    | 9  |
| (二) 综合防灾规划研究与实践方面 .....                      | 10 |
| 五、与有关的现行法律、法规和强制性国家标准的关系 .....               | 11 |
| 六、重大分歧意见的处理经过和依据 .....                       | 12 |
| 七、标准作为强制性国家标准或推荐性国家标准的建议 .....               | 12 |
| 八、贯彻标准的要求和措施建议 .....                         | 12 |
| 九、废止现行有关标准的建议 .....                          | 12 |
| 十、其他应予说明的事项 .....                            | 12 |

## 一、工作简况

### （一）背景与任务来源

2022年，党的二十大报告将“提高防灾减灾救灾和重大突发公共事件处置保障能力，加强国家区域应急力量建设”作为推进国家安全体系和能力现代化，坚决维护国家安全和社会稳定的核心任务。在此背景下，城市的规划与建设需要进一步统筹考虑安全与发展，但传统公共基础设施主要是为满足人民日常需求而建设，缺乏对于应急事件的快速响应能力。

2023年7月，《国务院办公厅关于积极稳步推进超大特大城市“平急两用”公共基础设施建设的指导意见》（国办发〔2023〕24号，以下简称“《指导意见》”）提出，超大特大城市人口规模大、人员流动快，新发重大疫情和突发公共事件始终是潜在的重大威胁，需要积极稳步推进“平急两用”公共基础设施建设，“平时”用作旅游、康养、休闲等，“急时”可转换为隔离场所，满足应急隔离、临时安置、物资保障等需求，实现城市更高质量、更可持续、更为安全发展。此外，《指导意见》明确了规划先行的工作要求。为指导超大、特大城市贯彻落实好“平急两用”公共基础设施建设工作，国家发改委、住建部、自然资源部等部门围绕国务院《指导意见》，先后出台“N+X”政策文件（合计约26项）。其中，住房和城乡建设部印发了《“平急两用”公共基础设施建设专项规划编制技术指南（试行）》（建办质〔2023〕43号），自然资源部印发了《平急功能复合的韧性城市规划与土地政策指引》（自然资办发〔2024〕19号），为“平急两用”公共基础设施建设专项规划编制提供了指导。

在此背景下，各超大、特大城市启动了对“平急两用”公共基础设施专项规划编制的探索。从实践情况看，当前“平急两用”公共基础设

施专项规划编制仍处于探索阶段，部分地区缺乏编制经验，各地规划实践在概念界定、技术路径、编制流程、成果内容等方面缺乏有效的参考与指导。为此，编制团队结合相关规划编制经验，开展了《“平急两用”公共基础设施专项规划编制指南》（以下简称“《指南》”）研究工作，以规范专项规划的编制工作。本标准于2024年列入中国城市规划协会标准编制计划。

## （二）目的意义

本指南旨在贯彻落实人民至上、生命至上的原则，指导各城市综合人口、物资、交通等要素，编制“平急两用”公共基础设施专项规划，明确本行政区域内“平急两用”公共基础设施的设施体系、目标指标、空间布局、保障措施与管理要求，推动建设总量充足、区域平衡、适度集约的“平急两用”公共基础设施群，探索平急功能复合、兼顾弹性与刚性的国土空间规划管理机制。

### （1）研究构建平急功能复合的公共基础设施体系，为城市提升综合防灾能力提供支撑

2020—2022年，新冠疫情对我国的规划建设管理方方面面的影响，也暴露了城市面对突发公共事件，存在着公共医疗资源短缺与结构不合理、应急物资储备与保供配送体系不完善、基层治理能力有待提升等诸多问题。为了增强城市应对突发公共卫生事件的能力，2023年，国务院印发了《关于积极稳步推进超大特大城市“平急两用”公共基础设施建设的指导意见》，发改、住建、卫健、规划、商务等部委围绕该指导意见，先后印发了19份配套政策文件，构建了“1+N+X”政策体系。为了落实上级部门的有关要求，切实提升超大特大城市应对各类安全风险隐患的能力，需研究完善平急功能复合的公共基础设施体系，为后续相关的城市规划建设管理工作提供基础框架，为城市应对多种类型的灾害风

险提供应对的思路。

## （2）推动完善平急功能复合国土空间规划体系

自然资源部印发的《关于统筹做好“平急两用”公共基础设施国土空间规划和用地保障工作的通知》提出，“平急两用”项目及其专项规划，要统筹纳入国土空间规划一张图、城市详细规划单元，确保相关设施在空间上合理布局、功能协调、环境融合、用地节约，并依据国土空间规划实施国土空间规划许可和用途管制。相关城市的自然资源部门应对规划编制的实施和土地利用状况，加强动态评估和监督管理。为推动“平急两用”公共基础设施落地，需结合相关规划实践，研究明确“平时”与“急时”规划的内容，探索出一条具有普适性的“平急两用”公共基础设施规划技术路径，将平急功能复合的规划要求融入国土空间规划体系。

## （三）主要工作过程

### （1）团队组建与前期研究（2024年4月至5月）。

根据2024年度中国城市规划协会标准编制计划，制定工作框架，收集、梳理国家、省、地市有关政策文件与案例，分析研究“平急两用”公共基础设施专项规划定位、目标任务，明确工作版块、成果形式、组织方式等，构建编制团队并明确各版块分工。

### （2）《指南》编制阶段（2024年5月至7月）

在前期研究的基础上，编制团队结合广州、北京、安徽、武汉等地“平急两用”公共基础设施专项规划、技术指引编制实践，对核心问题进行技术攻关，于2024年7月形成《“平急两用”公共基础设施专项规划编制指南》（初步成果）。

### （3）意见征询阶段（2024年7月至10月）

编制团队的各单位分别组织开展内部征求意见和全国行业内专家

函审，结合审查意见进一步完善《“平急两用”公共基础设施专项规划编制指南》。

#### （4）成果评审阶段（2024年11月至2025年3月）

依照中国城市规划协会的工作安排开展专家评审，结合评审意见完善团标成果，形成《“平急两用”公共基础设施专项规划编制指南》（征求意见稿）。

### （四）参与单位与主要起草人

#### （1）起草单位

本文件起草单位包括广州市城市规划勘测设计研究院有限公司、北京清华同衡规划设计研究院有限公司、安徽省城乡规划设计研究院有限公司、武汉市规划研究院（武汉市交通发展战略研究院）、湖北省轨道交通设计研究院股份有限公司。

#### （2）主要起草人

本文件主要起草人：邓兴栋、陈志敏、张佶、王建军、詹美旭、鄢金明、周小天、代欣召、张永雄、刘昆烨、焦白路、刘巍、曹力维、汪树群、孙冰洁、黄晓芳、徐晶、张美意、秦荆华。

## 二、《指南》编制原则和确认主要内容的依据

### （一）编制原则

#### （1）依法依规。

《指南》以满足人民对美好生活的需要为出发点，在贯彻落实总体国家安全观，全面落实国土空间规划底线管控方面的有关要求，在指导各地严守耕地和永久基本农田保护红线、生态保护红线、城镇开发边界和历史文化保护线、灾害风险控制线等底线约束的基础上，依据规划统筹做好“平急两用”公共基础设施空间保障。

#### （2）科学合理。

充分吸收国家部委相关政策文件指引、相关技术标准指引，对《指南》中规划内容、编制方法、工作流程等多方面进行优化，提升科学性与合理性。

### **（3）实施导向**

结合实地调研、部门座谈等方式，充分挖掘、梳理各地在推进“平急两用”公共基础设施建设过程中遇到的规划、选址、设计等方面的困难与瓶颈，并将各地的解决思路、技术路径充分融入《指南》中。

### **（4）差异化导向**

《指南》编制充分尊重不同地域在资源条件、发展水平、发展阶段、城市防灾要求等方面的差异，通过资料分析、调研咨询、会议讨论等方式，多种形式了解各地“平急两用”公共基础设施专项规划编制情况、特点，不强求模式化统一，鼓励创新。需持续监测全国各地“平急两用”公共基础设施规划与建设情况，必要时可对本文件相关内容进行调整完善。

## **（二）确定《指南》主要内容的依据**

### **（1）党中央重大决策部署**

党的二十大、二十届三中全会重大决策部署。

### **（2）国务院指导意见**

《中共中央国务院关于建立国土空间规划体系并监督实施的若干意见》（中发〔2019〕18号）《国务院办公厅关于积极稳步推进超大特大城市“平急两用”公共基础设施建设的指导意见》（国办发〔2023〕24号）对编制“平急两用”公共基础设施规划，推进“平急两用”公共基础设施建设做出了明确的部署。

### **（3）国家部委相关政策文件**

《国家发展改革委关于印发〈城郊大仓基地建设实施方案〉的通知》

（发展经贸〔2023〕1813号）《国家卫生健康委关于印发贯彻落实〈国务院办公厅关于积极稳步推进超大特大城市“平急两用”公共基础设施建设的指导意见〉实施方案的通知》（国卫规划发〔2023〕32号）《住房和城乡建设部关于印发贯彻落实〈国务院办公厅关于积极稳步推进超大特大城市“平急两用”公共基础设施建设的指导意见〉的实施方案的通知》（建质〔2023〕59号）《自然资源部办公厅关于统筹做好“平急两用”公共基础设施国土空间规划和用地保障工作的通知》（自然资办函〔2023〕1592号）《交通运输部办公厅关于印发《交通运输部贯彻落实〈国务院办公厅关于积极稳步推进超大特大城市“平急两用”公共基础设施建设的指导意见〉的实施方案》的通知》（交办规划〔2023〕53号）等26项国家部委关于“平急两用”公共基础设施建设的政策文件，从各行业领域对“平急两用”公共基础设施规划编制、建设任务、管理要求等方面做出了明确的规定。

#### （4）相关指南规范要求

《卫生健康委办公厅 发展改革委办公厅关于印发综合医院“平疫结合”可转换病区建筑技术导则（试行）》（国卫办规划函〔2020〕663号）《“平急两用”公共基础设施建设专项规划编制技术指南（试行）》（建办质〔2023〕43号）《平急功能复合的韧性城市规划与土地政策指引》（自然资办发〔2024〕19号）《广东省“平急两用”公共基础设施配套市政设施建设管理实施方案》（粤建城〔2024〕63号）《浙江省医疗应急服务点“平急两用”技术导则》（试行，公告〔2024〕13号）等相关指南规范，对“平急两用”公共基础设施专项规划的相关概念、技术方法、规划目标、规划内容等进行了明确。

**三、主要试验（或验证）的分析、综述报告、技术经济论证，预期的经济效果**



## **（一）《指南》主要内容**

### **（1）范围**

本文件规定了“平急两用”公共基础设施专项规划的一般性规定、主要编制内容、技术要点、实施保障、成果要求等内容，适用于各城市“平急两用”公共基础设施专项规划编制工作。

### **（2）规范性引用文件**

将与“平急两用”公共基础设施专项规划编制密切相关的标准作为规范性引用文件。

### **（3）术语和定义**

包括17个术语与定义，对“平急两用”公共基础设施专项规划涉及的专业术语进行了解释。

### **（4）一般性规定**

包括规划定位、规划范围与期限、编制原则、编制主体四部分内容。

### **（5）现状调查与需求分析**

包括基础情况调查、城市韧性评估、设施需求分析三个部分，其中：

1) 基础情况调查包括基础资料收集、座谈与访谈、现场调查。

2) 城市韧性评估包括灾害风险分析、城市防灾减灾能力评估、“平急两用”应用场景分析、“平急两用”公共基础设施选址安全指引。

3) 设施需求分析包括“平急两用”公共基础设施体系构建、“急时”与“平时”需求分析、“平急”需求匹配分析、“平急两用”市政配套基础设施需求测算。

### **（6）规划目标与空间布局**

包括平急功能复合规划的目标制定、设施选址指引、规划空间布局三部分内容，其中：

1) 平急功能复合规划的目标制定包括规划目标、指标体系制定。

2) 设施选址指引包括总体原则、基本要求以及各类“平急两用”公共基础设施细化的选址要求。

3) 规划空间布局包括总体要求、“平急两用”功能区划定、应急保障通道布局,以及各类“平急两用”公共基础设施具体的规划要求。

### **(7) 实施保障与平急转换指引**

包括近期实施规划、平急转换指引、规划实施保障三个部分。其中:

1) 近期实施规划包括制定近期建设目标与提出近期建设安排建议。

2) 平急转换指引包括平急转换要求、设施启用次序和区域调度指引。

3) 规划实施保障主要是针对资金保障、规划衔接与实施、土地利用、设施管理等方面提出实施保障建议。

### **(8) 成果要求**

包括规划成果构成、形式,规划文本、图纸与附件等。

### **(9) 附录**

包括“平急两用”公共基础设施专项规划推荐指标和“平急两用”公共基础设施专项规划土地利用相关保障措施建议。

## **(二) 重要问题说明**

### **(1) “平急两用”概念与设施体系**

目前,《指导意见》中提出的“急时”主要是新发重大疫情和突发公共事件,而在现实中,洪涝、台风、地震等自然灾害,交通事故、安全生产事故、火灾等人为灾害,亦是影响城市正常运行的严重隐患,只有科学的界定“急时”范围,才能制定针对性的灾害防治策略。因此,《指南》对“急”的概念进行了扩展,主要由各城市结合相关灾害评估成果与过往灾害防控经验综合确定,结合各类自然灾害、事故灾难、公共卫生事件、社会安全事故的案例与防治经验举措,面向广义的“急时”

概念，科学构建“平急两用”公共基础设施体系，明确各类“平急两用”公共基础设施的“平时”功能与“急时”功能。

## （2）“平急两用”公共基础设施的要素保障体系

“平急两用”公共基础设施作为一种新类型的设施，相较传统的设施新增了“急时”功能，在用地等方面的保障措施与管控要求目前仍在探索阶段，需明确设施选址、土地供应、规划管理等方面的要求，《指南》结合自然资源部有关政策文件，以及各地在“平急两用”公共基础设施建设方面的实践经验，总结了设施选址要求，并提出了实施保障内容编制方面的指引。

## （三）预期效果

通过构建平急功能复合的国土空间规划体系、公共基础设施体系与规划编制技术方法，为各城市编制“平急两用”公共基础设施规划提供指引，实现国家、省、市提高防灾减灾救灾和重大突发公共事件处置保障能力的要求。具体包括：

一是进一步完善“平急两用”的概念，面向广义的“急时”情景，指导各城市因地制宜构建“平急两用”公共基础设施体系，拓展“平急两用”公共基础设施应用场景，提升公共基础设施安全冗余。

二是完善平急功能复合的国土空间规划技术体系，在住建部、自然资源部相关指引文件的基础上，优化了“平急两用”公共基础设施专项规划的适用范围、编制基础、编制重点、技术路线等内容，推动增强各地“平急两用”公共基础设施建设工作的系统性、整体性、协同性。

## 四、采用国际标准和国外先进标准的程度，以及与国际、国外同类标准水平的对比情况

### （一）相关理论基础与韧性城市评估方面

“平急两用”是基于城市韧性理论发展出的一种概念，是对基于

城市韧性的城市安全治理理论的一种拓展。目前，学者和专家在韧性城市理论、社区韧性评估、城市组织韧性评估、城市基础设施韧性评估及各灾种下城市韧性评估等方面多有研究进展。在韧性城市理论方面，美国洛克菲勒基金会提出的CRF/CRI体系，是目前得到广泛应用的韧性城市框架理论体系；日本法政大学也对韧性城市评价指标体系进行探索，针对性地对城市系统气候变化和自然灾害进行韧性评定。

《指南》充分吸收了国际韧性城市相关评估体系与评价标准，将之融入“城市韧性评估”版块中。

## （二）综合防灾规划研究与实践方面

“平急两用”公共基础设施专项规划，本质上也是综合防灾规划的分支。针对安全风险防治的城市综合防灾规划研究，主要涉及城市防灾规划的制定、实施和评估等方面。这种规划的目标是通过整合各种资源、制定有效的措施和政策，以提高城市对各种灾害和风险的应对能力和恢复能力。

国外具有代表性的研究实践韧性思想也被逐渐引入城市防灾减灾研究中。如英国奥雅纳（ARUP）提出城市韧性框架（CRF），提供全面的、技术驱动的、适用全球的韧性城市解决方案。新加坡-ETH中心围绕城市系统和关键基础设施，联合政府部门开展韧性系统研究，构建和提升城市基础设施网络的安全韧性。同时，纽约、伦敦等城市在新一轮城市规划中已实施了韧性城市构建，从长远的、全局的和变化的视野，提升城市应对气候变化灾害的适应能力，着力解决从离散到整合、从短期到长期、从响应到适用、从刚化到韧性、从静态到动态等问题。

本《指南》结合我国“平急两用”公共基础设施规划、建设、管理实践经验，吸收了国内外城市综合防灾规划在设施评估、选址、空

间布局等方面的内容。

## 五、与有关的现行法律法规和强制性国家标准的关系

本《指南》严格执行现行法律法规。

本《指南》引用了以下标准：

GB 18466-2005 医疗机构水污染物排放标准

GB 51039-2014 综合医院建筑设计规范

GB 50849-2014 传染病医院建筑设计规范

GB 50320-2014 粮食平房仓设计规范

GB 51143-2015（2021版） 防灾避难场所设计规范

GB/T 35428-2017 医院负压隔离病房环境控制要求

GB/T 21334-2017 物流园区分类与规划基本要求

GB/T 51327-2018 城市综合防灾规划标准

GB/T 40947-2021 安全韧性城市评价指南

GB 55025-2022 宿舍、旅馆建筑项目规范

GB/T 44013-2024 应急避难场所 分级及分类

建标 107-2008 乡镇卫生院建设标准DK

建标 121-2009 救灾物资储备库建设标准

建标 163-2013 社区卫生服务中心、站建设标准

建标 173-2016 传染病医院建设标准

建标 172-2016 粮食仓库建设标准

建标106-2021 中医医院建设标准

建标110-2021 综合医院建设标准

CJJ-T189-2014 镇（乡）村仓储用地规划规范

TD/T 1074-2023 城乡公共卫生应急空间规划规范

T/CECS 961-2021 医学隔离观察设施设计标准

T/CECS 661-2020 新型冠状病毒肺炎传染病应急医疗设施设计标准

T/UPSC 0001-2021 应急传染病医院的选址、设计、建设和运行管理导则

T/UPSC 0007-2021 城市防疫专项规划编制导则

## 六、重大分歧意见的处理经过和依据

无。

## 七、标准作为强制性国家标准或推荐性国家标准的建议

建议作为推荐性行业标准实施。

## 八、贯彻标准的要求和措施建议

《指南》在编制过程中注重因地制宜，结合各城市地方实际与特征，在国务院《指导意见》，住建部、自然资源部等部委指导政策文件的基础上，预留了差异化落实的空间，鼓励各地在贯彻落实时进一步创新。建议《指南》发布后，利用好新闻媒体进行宣传，推动业界有关单位将《指南》应用到各地、各层级“平急两用”公共基础设施专项规划编制工作中。长期跟踪各地“平急两用”公共基础设施专项规划编制进展以及技术问题，做好反馈记录。

## 九、废止现行有关标准的建议

无。

## 十、其他应予说明的事项

无。
