# Supplementary material
Source: Research Square preprint supplement (doi:10.21203/rs.3.rs-9461961/v1)
Supplement: Supplementary file 7 [file 第10稿-平急两用公共基础设施专项规划编制技术指南-汇报稿(2).pdf › Supplementary materias/第10稿-平急两用公共基础设施专项规划编制技术指南-汇报稿(2).pdf]

# **“平急两用”公共基础设施建设专项规划**

## **编制技术指南**

（试行）



## 目 录

|                  |    |
|------------------|----|
| 前 言 .....        | 1  |
| 一、 适用范围 .....    | 2  |
| 二、 相关规范性文件 ..... | 2  |
| 三、 术语和定义 .....   | 2  |
| 四、 总体要求 .....    | 6  |
| 五、 主要编制内容 .....  | 7  |
| 六、 成果要求 .....    | 25 |
| 附录：基础资料收集 .....  | 28 |



## 前 言

为深入贯彻党中央、国务院有关部署，落实《国务院办公厅关于积极稳步推进超大特大城市“平急两用”公共基础设施建设的指导意见》（国办发〔2023〕24号）（以下简称《指导意见》）要求，依据《住房和城乡建设部贯彻落实〈国务院办公厅关于积极稳步推进超大特大城市“平急两用”公共基础设施建设的指导意见〉的实施方案》（建质〔2023〕59号）（以下简称《实施方案》），做好“平急两用”公共基础设施规划、建设、管理、转换相关工作，应对新发重大疫情和突发公共事件，提升城乡整体应急隔离保障能力，打造宜居、韧性、智慧城市，依据国家相关法律法规和标准规范，编制本指南。

本指南提出“平急两用”公共基础设施建设的一般性规定、设施体系、需求与选址安全评估、设施布局、实施保障、全生命周期管控、技术要点等编制内容。建议各地因地制宜深化技术指引。

本指南由中华人民共和国住房和城乡建设部组织编制，工程质量安全监管司负责管理和解释。

本指南主要起草单位：中国城市规划设计研究院、中规院（北京）规划设计有限公司。

请各单位在试行版本使用过程中，总结实践经验，提出意见和建议。

## 一、适用范围

本指南适用于超大特大城市“平急两用”公共基础设施建设专项规划的编制和实施。其它大城市可参照执行。本指南未涉及的内容，应按照国家相关标准规范执行。

## 二、相关规范性文件

《城市综合防灾规划标准》（GB/T 51327-2018）

《城市防疫专项规划编制导则》（T/UPSC 0005-2021）

《城乡公共卫生应急空间规划规范》（TD/T 1074-2023）

《物流园区分类与规划基本要求》（GB/T 21334-2017）

## 三、术语和定义

### （一）“平急两用”公共基础设施专项规划

对一定时期内城市“平急两用”公共基础设施规划目标、设施体系、配置标准、设施布局的综合部署、具体安排和实施管理。

### （二）“平急两用”公共基础设施

为应对突发大规模疫情或其他重大突发事件，体系化设立的满足应急隔离、临时安置、物资保障、医疗救治等需求的公共设施 and 基础设施。以下简称“平急两用”设施。

本指南按照《指导意见》，采取4类项目分类。各城市可按照因地制宜原则，增加符合自身需求和能力的设施体系，按需调整或增加设施类型，实现城市更高质量、更可持续、更为安全发展。

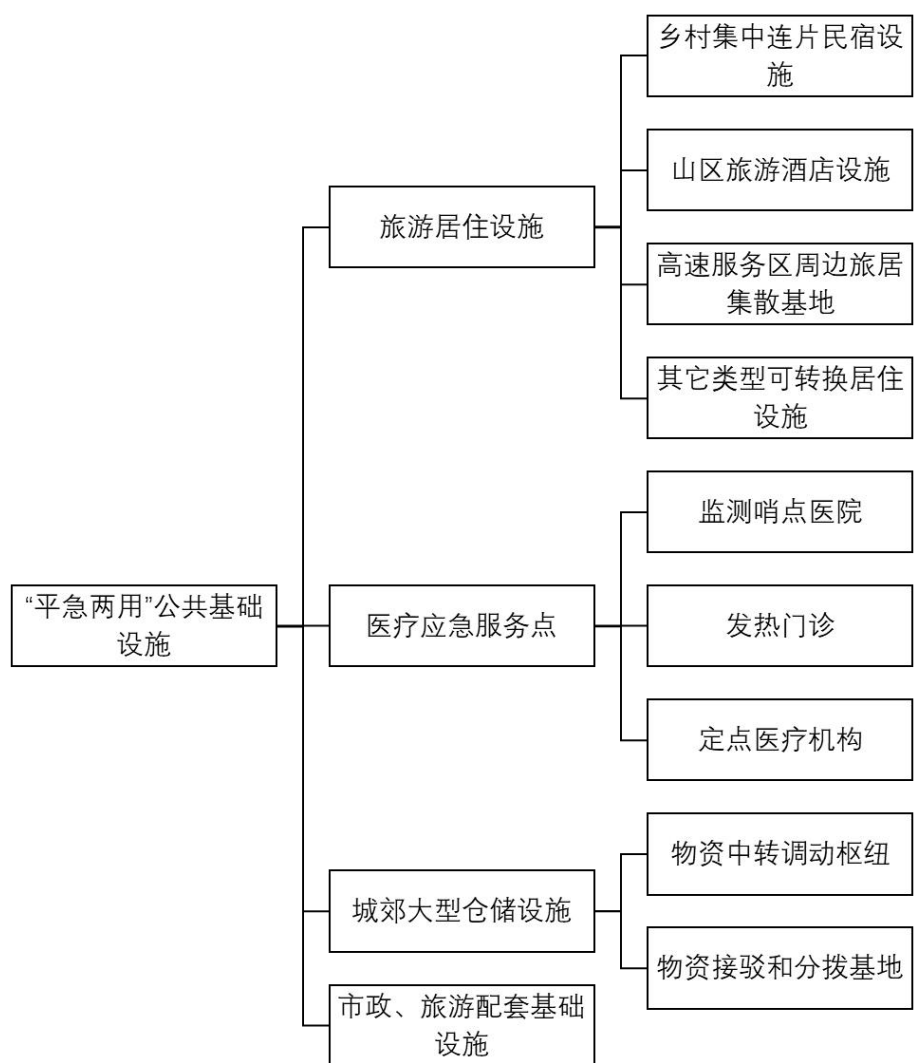

“平急两用”公共基础设施体系分类图

### （三）旅游居住设施

包括乡村集中连片民宿设施、山区旅游酒店设施、高速服务区周边旅游集散基地、其他类型等。“平时”服务于居民旅游、康养、休闲等居住需求。“急时”可迅速腾挪、转为隔离居住空间。

### （四）乡村集中连片民宿设施

主要盘活利用存量农村住宅、农村集体经营性建设用地，建设或改造的具有隔离、度假、远程办公等多功能的乡村民宿设施。

#### （五）山区旅游酒店设施

位于山区等旅游资源丰富地区，通过新建落实隔离功能要求或改造符合基本条件的酒店，提供安全、优质、适宜的旅游居住条件。

#### （六）高速服务区周边旅居集散基地

在中心城区通往山区县（区）旅游景点高速沿线的服务区周边，集加油、充电、停车、餐饮、住宿、休闲、农产品展销等多功能于一体的旅居集散基地。

#### （七）其它类型可转换居住设施

根据各地实际情况建设的，具备“急时”紧急疏散能力、完备隔离条件的居住设施。

#### （八）医疗应急服务点

“平时”满足周边居民日常诊疗服务需求，“急时”可转为满足应对突发疾病和救治意外伤害需求的定点医疗机构。包括监测哨点医院、发热门诊和定点医疗机构三类。

#### （九）监测哨点医院

为加强流行病或传染性疾病的预防控制，具有首诊信息收集与报送、不明原因性疾病预警功能的设施和场所。包括设置发热筛查门诊或发热门诊（或诊室）的社区卫生服务中心（站）、乡镇卫生院和村卫生室。



#### （十）发热门诊

正规医院门诊部在防控流行病或者传染性疾病期间根据上级指示设立的，专门用于排查疑似病例、治疗患者等的专用诊室。

#### （十一）定点医疗机构

包括定点医院和后备定点医院。定点医院是在突发公共卫生事件预案启动时，由人民政府指定本行政区域内综合实力较强、设施完备的综合医院（含中医医院）承担患者集中收治任务的医疗救治机构；后备定点医院是当定点医院无法满足需求时，可作为定点医院的补充。

#### （十二）城郊大型仓储基地

包括物资中转调动枢纽、物资接驳和分拨基地两类。“平时”服务城市生活物资中转分拨，“急时”可快速改造为应急物资和生活物资中转调动站、接驳点或分拨场地。

#### （十三）设施分布图

为便于“平急两用”设施体系管理和应急转换，标注具备“平急”转换能力公共基础设施重要信息的分布图。

#### （十四）启用次序表

依据“平急”转换预案制定的，描述各类具备“平急”转换能力公共基础设施重要信息和按需调度启用次序的表格。

## 四、总体要求

### （一）规划定位

本专项规划是超大特大城市“平急两用”设施建设领域的专项规划，是指导“平急两用”设施建设、管理、转换的重要依据，是保障城市韧性发展的重要安排。

### （二）规划期限和范围

规划期限至 2027 年，近期到 2025 年。

规划范围宜为市域行政辖区范围。

### （三）编制原则

规划应遵循以人为本的发展理念，坚持统筹规划、集约发展、平急结合、着眼长远、因地制宜，稳步有序的原则，统筹设施规划、建设、管理、转换全周期，提高城市高质量发展的安全韧性。

#### 1. 统筹规划、集约发展

落实城市战略定位和城市应急防灾目标，衔接国土空间规划和相关专项规划，保护耕地、保护生态环境，确定合适的规模、合理的功能。根据城市新冠疫情高峰时段人员“急时”外转情况，综合考虑在城市山区改造住宅等闲置资源及新建相关设施的实际条件，存量优先，积极盘活城市低效和闲置资源。

#### 2. 平急结合、着眼长远

与年度城市体检评估等结合，补齐城市安全韧性和公共服务设施“短板”。发挥“平急两用”设施综合使用效能，在新建、扩

建或改造时嵌入急时隔离等功能要求，提升城市应急防灾能力冗余。平时功能以服务民众、激发市场活力为出发点，鼓励产权主体和社会力量积极参与，促进规划实施。

### 3. 因地制宜，稳步有序

结合设施建设现状和地方财政能力，综合考虑区县地理区位、旅游资源、交通条件等因素，展现当地特有的山水风景，融合历史人文，体现地方特色。加强政策支持，不断完善相关标准、资金、用地等政策机制，持续完善城市“平急两用”设施体系。

### （四）编制主体

城市人民政府负责“平急两用”公共基础设施建设专项规划组织编制工作，市级发展改革、住房城乡建设、卫生健康主管部门共同牵头会同相关部门承担具体编制工作。

## 五、主要编制内容

### （一）设施需求评估和选址安全评估

根据疫情期间需求评估、旅游居住和仓储的市场分析，按照城市体检、综合防灾和防疫专项规划等，开展设施需求评估和选址安全评估。

#### 1. 设施需求评估

急时需求分析。各城市可参考《城市防疫专项规划编制导则》（T/UPSC 0005-2021）等标准规范，对急时的隔离救治能力、物流仓储能力和配套设施能力进行需求分析。具体可根据国家、省、

市应对公共卫生等突发事件的总体防控策略，根据对疫情强度、波及广度、严重程度预测以及防控实际需求综合研判，可基于疫情期间应对经验，按照逐级递增、升级加力的原则，设定疫情蔓延可能出现的情景，分别做好本地有隔离功能的旅游居住设施、大型仓储基地和医疗应急服务点的规模测算。

平时需求分析。结合旅游、仓储、医疗等相关专项规划文件，分析旅游居住设施、医疗应急服务点、城郊大型仓储基地的平时需求。汇总梳理城市旅游居住设施的发展目标和布局，分析民宿、酒店、度假村、旅居集散基地等设施的拟建资源，评估按需筹建、改造旅游居住设施的数量、布局。汇总梳理仓储基地的平时能力，依据本市仓储物流专项规划，分析物流模式、发展趋势，评估应急供应链的韧性和布局。汇总梳理区域医疗中心、综合医院、中医医院、社区卫生服务中心（站）、乡镇卫生院等医疗卫生设施，依据本市医疗卫生专项规划，评估医疗卫生服务设施在总量和均好性方面的缺口，拟定平时需求的规划清单。

平急需求综合匹配。将急时需求规模与平时需求匹配，统筹做好“平急两用”设施的规模测算，作为项目策划和选址依据，防止资源浪费。

## 2. 选址安全评估

参照《城市综合防灾规划标准》（GB/T 51327-2018）和《国土空间综合防灾规划编制规程》（报批稿），进行“平急两用”设施选址防灾安全评估。

汇总既有相关成果。以全国自然灾害综合风险普查为基础，汇总本地各类灾害历史资料、各项灾害风险评估成果、“双评价”、年度城市体检等，汇总城市各类灾害防灾专项规划成果，梳理城市各类灾害风险区、主要灾害风险控制线划定成果、重大危险源调查评估、灾害风险评估、用地安全评估、应急保障和服务能力评估等成果，确定防御灾种及重点内容，作为选址基础。

分析城市灾害风险。结合各类灾害危险源和主要灾害风险区的空间分布，做好旅游居住设施、城郊大仓、医疗应急服务点项目的选址，明确其防灾标准和规划要求。“平急两用”设施选址应避开灾害高风险区、用地不适宜地段、可能发生特大灾难性事故影响的设施与地区、应急保障服务能力薄弱区等城市防灾薄弱环节。

保障选址安全。结合灾害危险源和各类主要灾害风险区的空间分布，做好旅游居住设施、城郊大仓、医疗应急服务点项目的选址，明确其防灾标准和规划要求。

## （二）规划目标

### 1．总体目标

到 2025 年，超大特大城市“平急两用”公共基础设施建设积极稳步推进，一批具有隔离功能的旅游居住设施加快布局，一批具备快速中转能力的城郊大型仓储基地布局建设，配套医疗卫生服务设施逐步完善，相关标准、资金、用地等政策保障体系基本成形。到 2027 年，超大特大城市隔离、应急医疗和物资保障体系

更加健全，统筹重大突发公共事件应对和中心城区功能运转的基础更加坚实。“平急两用”公共基础设施的规划、建设、管理、转换机制全面形成。

## 2. 重要指标

原则上，到 2027 年，超大、特大城市规划储备具有隔离功能的房源分别不少于 2 万间、1 万间；超大特大城市疫情监测哨点医院覆盖辖区内所有区县，二级以上医院具备快速扩容发热门诊条件，承担主要救治任务的三级医院重症监护病区床位（含可转换重症救治床位）数占医院编制床位总数的比例不低于 10%。超大特大城市城郊大仓基地布局建设稳步推进，物流体系平急转换和应急物资保障能力进一步提升。各地根据历史经验数据和人口需求合理调整建设指标规模。

### （三）分区分级

#### 1. 基本要求

系统谋划布局：构建集隔离、应急医疗和物资保障于一体、有机衔接、系统完善的“平急两用”设施建设整体解决方案。

重视选址安全：应考虑“平急两用”设施自身的安全，选择布局在城市灾害风险类型少，风险危害程度较低的位置。

衔接相关规划：注重与国土空间规划体系相衔接，加强与城市更新、防震减灾、排水防涝、人防、消防、防疫等专项规划相协同。统筹垃圾废物等转运、集中处置需求，避开饮用水源保护区等敏感区域。尽可能不占或少占耕地，严格避让永久基本农田，

推进节约集约用地。

空间相对独立：考虑人口密度和社区风险，应与周边现状居住用地适度隔离，并具备较好的周边环境与卫生条件，以增加社会接受度和减少抵触情绪。

配套基本完善：应考虑医疗资源分布、交通便利性和社区接受度等因素，进行综合评估，选择具备足够空间和基础设施支持的选址。隔离防疫设施应靠近医疗资源丰富的区域，以便及时提供医疗支持和紧急救治。

兼顾平时功能：考虑可持续运营条件，旅游居住设施宜选择自然环境和休闲旅游条件较好地区布局，如靠近旅游景点、特色村镇、自然风景区、海滨或山区等。

保证一定规模：考虑应急隔离管理和配套设施成本，民宿设施应适度集中，避免“小而散”。

## 2. 分区规划

根据疫情防控管理经验，为加强城区与郊区协同，可根据人口分布、城市空间结构、社会经济和交通联系、疏散避难空间，合理划定以区（县）行政边界为基础的“平急两用”设施应急分区。在各应急分区内，明确各街道（乡镇）的城市隔离、应急医疗和物资保障的体系、设施目标、数量和关联网络，提出分区管控措施和要求。

## 3. 分级管理

依据规划分区，按照分级负责、属地管理的原则，因地制宜

形成职责清晰、运转高效的“平急两用”设施体系，制定应急预案，明确责任分工要求，落实分级响应，结合本地行政事权建立分级设施管理体系。

#### 4. 设施分布一张图

按照项目清单管理要求，将符合规划体系的综合旅游居住设施、城郊大型仓储基地、医疗应急服务点、配套设施在信息平台上图落位，纳入全生命周期管理，形成设施分布一张图。

### （四）旅游居住设施规划

#### 1. 规划要求

坚持因地制宜、因城施策，综合考虑超大特大城市山区县（区）地理区位、旅游资源、交通条件等因素，在充分尊重农民意愿前提下，盘活利用率不高的集中连片住宅等存量资源、农村集体经营性建设用地、有条件的旅游景区高速沿线服务区周边等空间资源，在新建、扩建或改造时嵌入隔离等功能要求，建设储备一批旅游居住设施，明确布局方向、类型和数量，提出功能配置和建设管理要求。

#### 2. 规划布局

乡村集中连片民宿设施。优先选取田园景观优美、周边具备已开发的旅游资源或者有开发潜力的村庄，为乡村集中连片民宿设施可持续发展打好基础。根据乡村资源条件，结合美丽乡村建设工作，因地制宜布局，突出山、海、林、田、园及建筑等村庄特色。民宿设施应适度集中，避免“小而散”，提高资源利用效率。



民宿设施应布局合理，保证“平时”住宿、餐饮、休闲等旅游服务设施不干扰村民正常生产生活，避免“急时”启用隔离功能对周边乡村构成安全隐患。

山区旅游酒店设施。规划选址应当符合《自然保护区条例》和《中华人民共和国自然保护区条例实施办法》等国家有关山区环境保护方面的法规和标准，以确保山区规划建设活动的合法性和可持续性。选址要结合双评估结果，保障山区旅游酒店设施的建设和使用安全。山区新建旅游酒店设施应采用低冲击开发模式，应充分利用地形、地貌，依山就势，不应対原地貌进行大开挖和深填方，合理开发利用山区资源。

高速服务区周边旅居集散基地。选址工作应结合本地综合交通枢纽规划及地方相关规划标准，结合中心城区通往山区县（区）旅游景点高速沿线的服务区资源，优先选择已具备应急服务功能的、已策划旅游主题的、周边具有潜力资源的高速公路服务区。结合高速服务区地理区位、资源优势、服务区类型等因素，统筹高速服务区现状功能配置短板，补足和完善“平时”以交通需求为导向的配套服务功能。高速服务区要做好“平时”和“急时”功能分区，保障“急时”转为应急隔离设施后不影响高速服务区的基本交通集散功能，做到可分可合、动静分离。要加大对停车场、加油（气）站、充电站等重点区域及食品安全等重点领域安全防范，提升安全意识，健全管理制度和应急预案，规划一批畅通、安全、舒适、美丽的服务区集散基地。

以上设施针对历史文化名村、传统村落，应注重符合历史文化名村保护规划和传统村落保护发展规划，新建乡村集中连片民宿设施应注重保持传统格局、历史风貌和空间尺度，不得改变与其相互依存的自然景观和环境，不得损害历史文化遗产的真实性和完整性。

### 3. 功能配置

乡村集中连片民宿设施。功能包括隔离、度假、远程办公、餐饮、住宿等，“平时”用作城市近郊旅游居住设施，“急时”转为隔离观察场所，并启用餐饮配送、布草消毒清洗、垃圾污水处理、医疗废物和污水处置等。

山区旅游酒店设施。包括隔离、客房、餐饮、娱乐等，结合具体规模可增加会议服务、游览服务等功能。“平时”作为安全、优质、适宜的旅游居住设施，“急时”满足隔离功能要求。

高速服务区周边旅居集散基地。集加油、充电、停车、餐饮、住宿、休闲、农产品展销等多功能于一体，“平时”作为旅游集散中心和汽车旅馆，缓解旅游旺季交通拥堵问题，“急时”转为应急隔离设施。

以上设施应严格按照“三区两通道”（隔离区、工作准备区、缓冲区，工作人员通道、隔离人员通道）的标准。

## （五）医疗应急服务点规划

### 1. 规划要求

疫情监测哨点医院覆盖辖区内所有区县，二级以上医院具备

快速扩容发热门诊条件，承担主要救治任务的三级医院重症监护病区床位（含可转换重症救治床位）数占医院编制床位总数的比例不低于 10%。通过中心城区高水平医院支援带动，支持县级医院、县域医疗卫生次中心等医疗卫生机构提标扩能，优化储备一批医疗应急服务点，提升突发疾病和意外伤害救治能力，“平时”满足周边居民日常诊疗服务需求，“急时”转为定点医疗机构。明确布局方向、类型和数量，提出功能配置和建设管理要求。

## 2. 规划布局

监测哨点医院。基层社区尤其是农村地区，对应人口规模，依托社区卫生服务中心（站）、乡镇卫生院、村卫生室，采用改扩建和新建相结合的方式灵活设置疫情防控监测哨点，每个社区（村）宜配备 1 处监测哨点医院。

发热门诊。二级及以上综合医院、所有儿童专科医院应在医院独立区域规范设置发热门诊和留观室，或具备“急时”快速扩容发热门诊条件。新建发热门诊外墙与周围建筑或公共活动场所间距不小于 20 米。发热门诊应采取网格化方式规划布局，确保各地每个县（区）均有发热门诊，避免患者跨县（区）就诊。

定点医疗机构。按照社会影响小、安全性高的原则确定选址，应远离城市中心和居民区、幼儿园、学校等人口密集区域，远离有易燃易爆有害气体生产储存场所，远离食品和饲料加工生产企业等区域。定点医院和后备定点医院根据全市公共卫生和防疫要求确定，每个县（区）宜设置 1 所区级定点医院。

### 3. 功能配置

监测哨点医院。兼具疾病预防控制和“平时”医疗救治职能，应发挥哨点功能，规划配置应急空间。应急空间包括预检分诊点、发热诊室（门诊）、（临时）隔离点（室）、采样点和转运场所。监测哨点医院应符合《乡镇卫生院建设标准》（建标 107-2008）和《社区卫生服务中心、站建设标准》（建标 163-2013）相关规定。监测哨点医院应急空间占地面积、建筑面积等配置标准应符合《城乡公共卫生应急空间规划规范》附录 F 的规定。

发热门诊应设置于医疗机构独立区域的独立建筑，标识醒目，具备独立出入口。医院门口、门诊大厅和院区内相关区域要设立醒目的指示标识，内容包括发热门诊方位、行走线路、接诊范围及注意事项等。发热门诊建设，按照《发热门诊设置管理规范》（联防联控机制医疗发〔2021〕80 号）执行。

定点医院和后备定点医院均宜设置独立的传染病区，宜在《综合医院建设标准》（JG 110-2021）、《中医医院建设标准》（JG 106-2021）、《传染病医院建设标准》（JG 173-2016）标准上增加不少于 3%的用地面积和不少于 5%的建筑面积。

### （六）城郊大型仓储基地规划

#### 1. 规划要求

“平急两用”城郊大型仓储基地在“平时”服务城市生活物资中转分拨，“急时”可快速改造为应急物资和生活物资中转调动站、接驳点或分拨场地。加强城郊大仓基地与国家物流枢纽等重

大物流基础设施衔接，加快完善城市生活物资物流设施网络，进一步提升“急时”快速就近调运物资能力。明确布局方向、类型和数量，提出功能配置和建设管理要求。

## 2. 规划布局

应统筹开展设施选址布局、规模测算，确定新建或结合现址改扩建。应梳理规划中的大型综合物流园区（物流基地）、分拨中心（仓储配送中心）、批发市场等仓储物流的节点网络，分析低效和闲置资源，依据城市空间结构、城乡人口分布、仓储物流覆盖范围等，结合不同类型的应急物资储存要求，确定城市应急仓储物流配送分区、应急物资保障分区。应结合历史经验，识别并确定重大疫情和突发公共事件情境下的关键仓储物流基础设施。应统筹各类应急物资的仓储和配送中心功能，明确城郊大型仓储基地的物流通道联系。

城郊大仓应布局于交通便利的地方，方便接收和分发货物。选址应符合国土空间规划、规划设计通则、满足项目准入条件等。应评估防范各类风险，根据项目类型、建设规模开展设施环境影响评价、交通影响评价、能源技术评价等，不宜布局在危险品仓储和使用设施周边、地质灾害易发地段、矿产开采区、采空区、能源走廊、生态敏感区、水源保护区等不适宜建设范围。

## 3. 功能配置

合理划分仓库功能区域，应设有专门的接收进货、分发出货和办公管理区域。仓库内部布局应高效、灵活，便于货物的接收、

存储和分发。应优化平时、急时分别的货物流路径，完善内部设施布局，保证急时有专门的货物存储区域、装卸区、行车道、办公区域等。应根据货物的性质、尺寸和流通要求，提供普通仓储、收储中转、物资储备，以及农副仓储、生鲜冷链、医疗产品冷藏等不同类型的仓储功能，补齐功能性设施短板。根据平时和应急货物的特性和仓库环境的要求，仓库应有相应的空调和通风系统等环境控制设施，以保持适宜的温度、湿度和空气质量等。

每处设施建筑面积宜大于 6 万平方米(用地面积大于 6 公顷)，含 3 个以上用地基本单元(用地面积按 2 公顷计)。按照不低于一类保护物(建筑)标准开展“平急两用”改造，提升设施的抗灾冗余性与防护水平，适当预留备用仓储建筑面积。仓库宜配建双重电源、备用水源，保证两个以上交通出入方向等。预留货运设备场地，如叉车、货柜车和自动化设备等。仓库应配置可靠的网络和通信基础设施；考虑环境保护和可持续性因素，如节能照明系统、太阳能发电、雨水收集系统等。应采取智慧化的库存管理方式，应用信息化技术与数字化工具，确保应急物资库存的准确性和实时性，通过合理的库存预警机制，及时调配补充应急物资；利用信息技术手段，建立应急物资跟踪、调度指挥和物资调配系统，可按照平时与急时的不同预案便捷切换物流网络、仓库管理方案。

## （七）配套设施规划

### 1. 旅游配套设施

加强“平急两用”设施周边重大旅游基础设施建设，促进优质旅游资源扩容。开展城乡环境卫生清理整治，营造干净、整洁、舒适的旅游居住环境，为相关设施“平时”运营提供基础支撑。鼓励围绕优质旅游资源，在周边及相关道路沿线打造“平急两用”设施集聚区，推动隔离居住设施与旅游设施融合发展，满足“平时”市民多元旅游居住需求，保障“急时”集中转换使用需要。

旅游基础设施规划。结合规划旅游居住设施，挖掘当地旅游潜力，布局旅游项目，扩容旅游资源。挖掘、梳理、展示当地特色，进行风貌特色保护、绿化景观、建筑、环境小品等景观风貌与村庄设计引导；涉及历史文化保护要素地区的，应对要素周边建设的风貌提出控制引导要求。因地制宜布局治理农村生活垃圾和污水的配套措施，实现环境干净整洁有序。对于以发展旅游观光为特色的村庄，可因地制宜规划绿道、骑行道、慢行道等旅游特色道路，可结合现有道路设置，也可以单独设置。

旅游公共基础设施集聚区规划。按照城乡基本公共服务均等化要求和乡村生活圈理念，结合村庄居民点布局以及村民实际需求，梳理“平急两用”设施周边现状缺少及配置不达标的公共服务设施项目，配置各类村庄公共服务设施，具体包括村委会、文化礼堂、文化活动场所、健身场地、快递服务、农贸市场、养老服务设施、教育设施等。确定公共服务设施配置内容和建设要求，

明确各类设施的规模、布局、标准等。集聚建设村、整治提升村和特色保护村应根据现状公共服务设施分布、村民住宅布局等情况，在满足建设要求的基础上，采用新建、扩建等多种方式灵活布局。特色保护村应根据村庄特色需求，可重点考虑配置一些与文化旅游相关的公共服务设施。城郊融合村可根据自身区位条件与需要，因地制宜与城镇公共服务设施共享配置，从合理性和避免重复建设出发，适当调整设施配置项目和标准。

## 2. 道路设施

统筹建设“平急两用”设施内部与外部的道路，形成衔接高效、安全韧性的配套道路体系。配套道路应衔接各级交通专项规划，以“平急两用”设施周边高、快速路，主干路及一级公路为骨架，以其他等级道路为连接线布局，提升“平急两用”设施与城市路网的连通能力。原则上不能设唯一通道，应有备用通道，优先选用沿线桥梁少、隧道少的道路。

道路的限高及限宽标准、抗灾设防能力和重要节点连通方式应充分保障“平时”旅游与生产生活需求，“急时”物资运输与人员转运需求，特别是大型客车、大型物流车辆及其它特需车辆的通行要求，并满足《城市综合防灾规划标准》（GB/T 51327）中应急通道相关规定。

## 3. 通信设施

“平急两用”设施及周边地区的广电设施、通信基站、通信机楼、通信枢纽、通信线路、宽带网络、微波通道等通信设施应



与各级应急指挥系统保持互联互通，整合公安、消防、地震、防汛、市政、气象、防疫等应急指挥专用通信平台，协调共享应急通信专线和数据通道等资源，保障“平急两用”设施通信服务全覆盖。定点医院、后备定点医院、疫情监测哨点医院应满足应急通信服务全覆盖。应急通信设施应为多路由、接入3个或以上方向。城郊大仓基地应满足应急通信服务全覆盖，应急通信设施应为双路由、接入2个或以上方向。

#### 4. 污水处理设施

“平急两用”设施及周边应采用雨污分流排水体制，设计预留污水排放、雨水蓄滞等空间，配套建设雨水抽排泵站和设备，为污水处理站预留水、电等接入条件和场地。

具有隔离功能的旅游居住设施、医疗应急服务点的排水系统应当根据应急场景进行分区设计，平时相互连通，急时实现快速分区，清洁区与污染区的排水系统应相互独立不串接。排水管网、调节池、提升泵站、消毒和处理设施等排水设施应满足在“急时”状态下产生的有传染性的污水全收集、全处理、全过程控制的需要，污水收集管网全覆盖。

定点医院、后备定点医院排水管网建设完善，独立建设公共卫生污（雨）水处理站。疫情监测哨点医院配套建设排水管网和临时性污水处理罐（箱），确保污水不直接排入环境。“平急两用”设施下游无污水处理厂时，就近设置污水处理系统，水质满足国家或地方有关要求后方可排放。

## 5. 生活垃圾和医疗废物处置设施

生活垃圾应急处理设施应具备必要的防护和隔离条件，符合消杀防疫设计要求，其日均应急处理能力不低于上年度日平均处理量的 10%。医疗废物的收集、消毒、包装、贮存、运输、处置等设施应满足医疗废物全过程控制需要。

“平急两用”设施应设置或者预留生活垃圾收集转运设施及场地，确保“急时”相关设施设备可快速安装投入使用。疫情期间医疗垃圾生产量将迅速增长，重点管控生活垃圾和医疗垃圾产生量随疫情规模发生变化。按照永久临时结合、常态备用的原则，预留好市级和区级医疗废物处置中心用地。一般疫情情况下，医疗垃圾由规划医疗废物处置中心处理；若规划医疗废物处置中心不能满足处理需求时，需根据疫情防控需要，启动市级应急医疗废物处置中心或区级应急医疗废物处置中心建设，或将部分生活垃圾焚烧厂（或焚烧炉）改造为医疗废物处置设施进行应急处置。定点医院、后备定点医院的医疗废物和受污染的生活垃圾运至医疗废物处置中心集中处置；疫情监测哨点医院的医疗废物和受污染的生活垃圾运至医疗废物处置中心或通过其他高温热处理设施集中处置。

### （八）实施保障

#### 1. 实施组织

各城市人民政府应按照本市应急体系框架，建立规划实施机制，因地制宜建立完善建设管理、维护监管、平急转换、资金保

障、监督实施、人员培训等机制和技术体系，保障规划内容的实施落到实处。

编制规划时宜同步制定实施方案，衔接城市体检、城市更新等行动要求，对规划的主要目标、任务进行分解，明确要求和责任，与专项规划同步批复。城市人民政府有关部门和单位宜按照职责制定完善本地区“平急两用”设施落实保障机制，指导各实施主体制定行动计划或实施方案，加强不同项目间各类资源的共建共享，促进跨领域、跨部门配置资源、融合发展。

## 2. 支持保障

各城市按照同应急需求相适应、与政府财力相匹配的原则，提出政府保障项目投入、激励选拔、运行维护、“平急”转换的资金分期使用计划，建立与“平急”转换预案匹配的资金保障机制，推动本规划确定项目的资金足额落实到位。充分发挥市场机制作用，尊重产权人、运营权人意愿，合理构建“平急”两用体系。

应将“平急两用”设施专项规划纳入国土空间专项规划体系，重大项目合理采取单独选址方式保障用地，相关用地和留白空间统筹纳入国土空间规划“一张图”实施监督系统，用好土地依法划拨、农村集体经营性建设用地入市等配套政策。

## 3. 公众参与

充分调研人民群众对“平急两用”设施需求，客观评估项目落地可行性。健全专家领衔咨询机制，组建包括各相关领域专家的综合性咨询团队，鼓励专业机构参与规划。形成通俗易懂的成

果，充分征求有关部门、社会各界意见，及时公开并接受社会公众监督。加强宣传教育和引导，提高人民群众对“平急两用”设施重要性的认识，鼓励人民群众积极参与、监督设施的建设、运行和维护。考虑城市居民对于隔离防疫设施的接受度和反馈，在选址安全评估中，应进行公众参与和沟通，尽量减少不必要的抗议和阻力。

#### 4. 评估修改

规划实施过程中，城市人民政府相关部门宜建立实施跟踪监测机制，结合城市体检适时对实施情况、应急能力转换开展专项评估，稳步提高设施转换和保障能力，保障规划指导建设的能力。规划经评估或者因其他原因需要进行修订的，建设项目的调整宜采取简单程序调整，中长期规划目标、分区部分的调整宜按原审批流程和层级批准。

#### 5. 全生命周期管控

“平急两用”设施对规划建设和平时急时运营转换管理有整体性、系统性要求，应落实项目清单管理制度，采取“全生命周期管理”方式。专项规划应研究建设、管理、转换等环节，以顺畅转换和质量安全为核心，以服务全市“设施分布一张图、启用次序一张表、建设管理信息系统平台”为目标，构建从规划建设、到施工验收、再到运维转换的闭环管理制度。

## “平急两用”设施项目清单和建设管理信息系统平台全生命周期管控

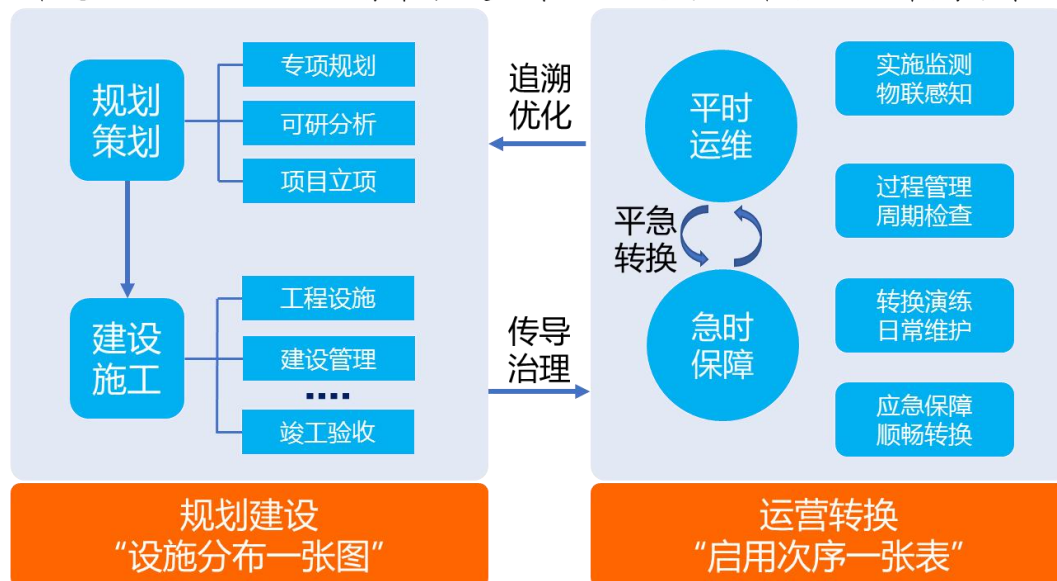

### “平急两用”设施全生命周期管控

## 六、成果要求

### (一) 成果构成、形式

规划成果由规划文本、规划图纸和规划说明组成。

成果形式为纸质文档和电子文档。纸质文档采用 A4 幅面竖开本装订，其中，规划图集宜采用 A3 幅面印制并折页装订。电子文档采用通用的文件存储格式，其中文本可采用 PPT、DOC、PDF 等文本格式或图形格式，图纸文件应采用 CAD、GIS 等矢量文件格式存储。

### (二) 规划文本

规划文本内容一般包括总则、规划目标、设施布局、旅游居住设施规划、医疗应急服务点规划、城郊大型仓储基地规划、医疗应急服务点规划、配套设施规划、分期建设和规划实施保障措

施等。

1. 总则主要包括指导思想、规划依据、规划原则、规划期限和范围等；

2. 规划目标主要包括“平急两用”设施建设规划总体目标和重要指标等；

3. 设施布局主要包括“平急两用”设施布局分区、设施分类、项目布局等；

4. 旅游居住设施规划包括乡村集中连片民宿设施规划、山区旅游酒店设施规划和高速服务区周边旅居集散基地规划；

5. 医疗应急服务点规划包括疫情监测哨点医院规划、发热门诊规划和定点医疗机构规划；

6. 城郊大型仓储基地规划包括中转调动站、接驳点或分拨场地等规划；

7. 配套设施规划包括旅游配套、道路、通信、污水处理、生活垃圾和医疗废物处置等规划；

8. 规划实施保障机制建议包括规划实施组织、清单管理、用地保障、公众参与、评估修改和全生命周期管理。

规划文本应以条文方式表述规划结论，内容明确简练，具有指导性和可操作性。

### （三）规划图纸

规划图纸一般应包括以下内容：

1. “平急两用”公共基础设施现状图

2. “平急两用”公共基础设施规划图
3. 旅游居住设施规划图
4. 城郊大型仓储基地规划图
5. 医疗应急服务点规划图
6. “平急两用”建设配套设施规划图
7. “平急两用”设施建设分区指引图
8. 近期建设规划图（到 2025 年）

9. 相关分析图规划图纸所表达的内容应清晰、准确，与规划文本内容相符。可根据图示内容及比例尺，酌情分拆出图。现状图、规划图和分析图应保持图例一致。

#### （四）规划说明

规划说明应由正文和附件（可选）组成。

正文应与规划文本的条文相对应，对规划文本条文做出说明，并增加现状分析（如现状设施、存量房屋建筑资源等）、能力评估和需求预测（急时防疫能力评估、急时与平时设施建设需求预测）、灾害风险分析等内容章节。附件可包括专题研究报告、基础资料汇编、相关地方标准规范、资金、用地等政策文件说明、会议纪要、部门及地方意见等。

## 附录：基础资料收集

基础资料收集应包括社会经济、城乡规划、疫情防控、灾害风险、旅游居住、大型仓储（城郊大仓）、医疗卫生、市政、旅游资源等，并注重资料数据的全面性、准确性、时效性。

1. 城市社会经济方面包括城市概况、地形地貌、行政区划、人口及用地规模，城市布局形态、用地分布，城市土地利用、人口及就业岗位分布。

2. 城乡规划方面包括国土空间总体规划、控制性详细规划、综合交通规划、城市物流、历史文化名城、名镇、名村、传统村落、通信、环卫、医疗废弃物、污水、医疗卫生、防疫和综合防灾等相关专项规划等。

3. 疫情防控方面包括疫情防控的组织体系和管理机制，疫情防控和突发公共卫生事件应急预案，本省市应对疫情出台的隔离、救治、交通、物资储备类、市政设施类相关政策和标准，发热门诊、定点医院、后备定点医院、方舱医院建设情况。

4. 灾害风险方面包括全国自然灾害综合风险普查成果、全域各类灾害历史资料、各类灾害风险评估成果、各类灾害风险区和主要灾害风险控制线划设成果、本级国土空间总体规划的基础研究“资源环境承载能力和国土空间开发适宜性评价”、“灾害风险评估”成果等。

5. 旅游居住方面包括收集人口统计数据 and 人口流动情况，包括旅游人口、外来人口等；收集城市旅游市场的数据、旅游业发



展趋势报告，了解游客和目标客群的数量、偏好、消费水平等；收集城市主要休闲旅游资源、景点分布、文化活动等，结合城市主要旅游交通网络，评估景点资源可达性；评估城郊旅游居住设施服务水平，如客房数量、公共设施、餐饮设施、娱乐设施等。

6. 大型仓储方面包括收集重点仓储物流设施地址与交通区位、用地规划和建设许可、仓储品种和储备规模等信息；收集相关部门城市突发事件应急预案；收集城市仓储物流市场调研和行业报告；收集物流基地历史库存和进出库数据、供应链数据等；收集急时仓储和物流品类的供应历史数据、供应链信息。

7. 医疗卫生方面包括区域医疗中心、综合医院、社区卫生服务中心（站）、乡镇卫生院、村卫生室和中医医院的位置、等级、用地面积、床位数、技术人员情况。

8. 市政方面包括城乡河湖水系现状规模等级，道路交通、通信设施、污水处理设施、垃圾和医疗废物处置设施、绿地等市政设施的现状规模、等级类型、服务范围、布局。

9. 旅游方面包括收集人口统计数据 and 人口流动情况，旅游人口、外来人口等；城市旅游市场的数据、旅游业发展趋势报告，了解游客和目标客群的数量、偏好、消费水平等；城市主要休闲旅游资源、景点分布、文化活动等，结合城市主要旅游交通网络，评估景点资源可达性；评估城郊旅游居住设施服务水平，如客房数量、公共设施、餐饮设施、娱乐设施等。
