# Supplementary material
Source: Research Square preprint supplement (doi:10.21203/rs.3.rs-9461961/v1)
Supplement: Supplementary file 8 [file 送审稿《公共服务设施嵌入“平急两用”功能设计指南》.pdf › Supplementary materias/送审稿《公共服务设施嵌入“平急两用”功能设计指南》.pdf]

# 公共服务设施嵌入“平急两用”功能设计指南

Design Guideline for Embedding the "Both Regular and Emergency  
Use" Function of Public Service Facilities

(送审稿)

北京市规划和自然资源委员会

2025 年 11 月

# 前 言

为贯彻落实党的二十大精神，推动《北京城市总体规划（2016 年-2035 年）》及《“十四五”发展规划及 2035 年愿景目标纲要》的实施，按照《北京市“十四五”时期规划和自然资源标准化工作规划（2021 年-2025 年）》的通知的要求，结合《北京市韧性城市空间专项规划（2022 年-2035 年）》相关规定，编制组在广泛调查研究、认真总结实践经验、吸取科研成果以及广泛征求意见的基础上，完成本指南的编制工作。

本指南共分 8 章，主要内容包括：1 总则；2 术语；3 基本规定；4 通用设计要求；5 中小学校；6 展览馆；7 体育馆；8 配套设施。

本指南由北京市规划和自然资源委员会归口管理，北京市规划和自然资源标准化中心负责日常管理，北京市建筑设计研究院股份有限公司（地址：北京市西城区南礼士路 62 号，邮编：100045，电话：88042286，邮箱：yangyinan@biad.com.cn）负责具体技术内容解释工作。本指南执行过程中如有意见和建议，请寄送至北京市规划和自然资源标准化中心（电话：55595000，邮箱：bjbb@ghzrzyw.beijing.gov.cn），以供今后修订时参考。

**本 指 南 主 编 单 位：**北京市建筑设计研究院股份有限公司

清华大学建筑设计研究院有限公司

**本指南主要起草人：**

**本指南主要审查人员：**

# 目 次

|     |                 |    |
|-----|-----------------|----|
| 1   | 总 则 .....       | 4  |
| 2   | 术 语 .....       | 5  |
| 3   | 基本规定 .....      | 7  |
| 4   | 通用设计要求 .....    | 8  |
| 4.1 | 应急场景分级分类 .....  | 8  |
| 4.2 | 规划选址 .....      | 9  |
| 4.3 | 资源调查与风险评估 ..... | 9  |
| 4.4 | 平急转换要求 .....    | 10 |
| 4.5 | 设计通用要求 .....    | 10 |
| 5   | 中小学校 .....      | 14 |
| 5.1 | 基础类型要求 .....    | 14 |
| 6   | 展览馆 .....       | 17 |
| 6.1 | 基础类型要求 .....    | 17 |
| 6.2 | 防疫类型要求 .....    | 18 |
| 7   | 体育馆 .....       | 22 |
| 7.1 | 基础类型要求 .....    | 22 |
| 7.2 | 防疫类型要求 .....    | 23 |
| 8   | 配套设施 .....      | 26 |
| 8.1 | 交通组织 .....      | 26 |
| 8.2 | 能源条件 .....      | 26 |
| 8.3 | 供水系统 .....      | 26 |
| 8.4 | 排水处理 .....      | 26 |
| 8.5 | 垃圾收集 .....      | 27 |
| 8.6 | 通信设施 .....      | 27 |
| 8.7 | 物资储备 .....      | 27 |
|     | 指南用词说明 .....    | 28 |
|     | 引用标准名录 .....    | 29 |

# 1 总 则

**1.0.1** 为更好统筹首都发展和安全，聚焦全面提升疫情防控能力，兼顾防洪、防火等防灾减灾应用场景需要，打造“功能可转换、空间可承载、发展可持续、经济有支撑、安全有保障”的“平急两用”体系，持续增强城市安全韧性能力，规范和指导北京市“平急两用”公共服务设施的建设，特制定本指南。

**1.0.2** “平急两用”公共服务设施通过“空间复用、快速转换、智慧运维”等措施，将成为传统应急避难场所的重要补充，并显著提升城市应对突发灾害的韧性与效率。

**1.0.3** 本指南适用于北京市行政区域内新建、改扩建“平急两用”公共服务设施建设要求，重点针对中小学校、展览馆、体育馆三类公共服务设施在紧急情况发生时人员隔离观察、临时安置、应急指挥、应急医疗、物资保障等需求，制定本指南。

**1.0.4** “平急两用”公共服务设施的设计、建设除参考本指南外，还应符合国家、行业及北京市现行相关的法律法规、标准规定的规定。

## 2 术 语

### 2.0.1 “平急两用”公共服务设施

指兼具日常服务功能和突发事件应急响应能力的公共服务设施,旨在通过兼容设计和管理,使其平时既能满足群众日常生活需求,紧急情况(地震、水灾等灾害为主,统筹兼顾气象灾害、突发地质灾害、危险化学品事故、火灾事故、矿山事故、重大传染病疫情、恐怖袭击事件等灾害,兼容其他相关灾害风险)发生时,具备快速转换为受灾人员隔离观察、临时安置等需求的应急场所及设施。

本指南应对灾害种类主要依据《北京市应急避难场所规划(2022年—2035年)》总则第六条 规划对象中相关规定:针对北京市主要灾害类型及应急避难场所功能特征,以应对地震、水灾等灾害为主,统筹兼顾气象灾害、突发地质灾害、危险化学品事故、火灾事故、矿山事故、重大传染病疫情、恐怖袭击事件等灾害,兼容支撑其他相关灾害风险,建立适应多灾种的安全庇护职能。

### 2.0.2 基础类型

指为应对突然发生,造成或者可能造成公众健康严重损害的紧急情况(地震、水灾等灾害为主,统筹兼顾气象灾害、突发地质灾害、危险化学品事故、火灾事故、矿山事故、恐怖袭击事件等灾害,兼容其他相关灾害风险),“平急两用”公共服务设施应达到的响应要求。

地震灾害发生后,当地震为孤立型或主震—余震型地震时,可开展平急转换;当余震对建筑造成新的损伤或破坏时,应重新对已开展平急转换的建筑进行应急评估。”此外,由于地震具有破坏力强、影响面广、不可完全预见性等特点,对于地震后的防灾、救灾及灾后救援等工作,主要应遵循国家及地方相关专项法规、标准要求。如《地震应急避难场所场址及配套设施》(GB 21734-2008)、《北京市地震灾害风险防治工作方案》、《2025年北京市区级防震减灾和抗震救灾工作要点》等。

### 2.0.3 防疫类型

指为应对突然发生,造成或者可能造成公众健康严重损害的重大传染病疫情等紧急情况时,“平急两用”公共服务设施应达到的响应要求。

### 2.0.4 三区两通道

指防疫模式启用时,“平急两用”公共服务设施设计、建设平面布局所应达到的基本要求。“三区”即隔离区、工作准备区、缓冲区;“两通道”即工作人员通道、隔离人员通道。“三区两通道”运行模式在传染性疫情隔离观察时启用。

### 2.0.5 隔离区

指防疫模式启用时,隔离人员接受隔离、医学观察的区域,由若干隔离观察单元组成。

根据需要设置管理用房、服务用房、应急医疗用房及垃圾暂存间、污水处理设施等配套用房。可按建筑单体、楼层等,将隔离区划分为不同的隔离观察单元。

### 2.0.6 工作准备区

指防疫模式启用时,隔离区外工作人员工作及休息的区域。

包括工作人员办公室、值班室、休息室、物资库房,开水间、备餐间、设备机房等,可根据需要设置警务工作站、厨房、工作人员餐厅、宿舍等用房。

### **2.0.7 缓冲区**

指防疫模式启用时，设于隔离区与工作准备区之间，供工作人员及物资由工作准备区进入隔离区、由隔离区返回工作准备区时进行卫生处置的区域。

包括工作人员换鞋、更衣、洗手、淋浴，以及穿戴、卸去防护用品的操作空间，并应安排物资配送通道。

## 3 基本规定

**3.0.1** “平急两用”公共服务设施应按《北京城市总体规划（2016-2035 年）》及《关于推进本市“平急两用”公共基础设施建设总体实施方案》要求，合理确定规模及功能。

北京市“1+3+5”的“平急两用”格局，“1”即平谷区创建国家“平急两用”发展先行区，主要承担中心城区、城市副中心及本区的隔离和防灾避险人员安置任务；“3”即门头沟区、房山区、昌平区结合“23.7”灾后恢复重建落实“平急两用”工作要求，主要承担本区隔离和防灾避险人员安置任务；“5”即顺义区、大兴区（含北京经济技术开发区）、怀柔区、密云区、延庆区，主要承担本区隔离和防灾避险人员安置任务。

**3.0.2** “平急两用”公共服务设施应基于相关规划要求及其自身功能特点，科学评估，实事求是，确保平急转换后既能发挥“急时”作用，又便于恢复原有建筑功能。

满足“平时”使用功能的同时，在新建、扩建或改造时合理兼顾相应的防控应急服务功能要求。预留适当的空间和设施接口，确保功能转换的便捷性和高效性。

**3.0.3** 既有存量公共服务设施改造利用为“平急两用”公共服务设施时，应遵循韧性城市及相关专项规划指引，依据本指南及相关标准规范要求，提前进行场地安全、结构安全及“平急两用”转换能力评估。

**3.0.4** “平急两用”公共服务设施应加强数据管理，结合数据分级、网络隔离、应急状态日志留存、隐私与敏感信息保护、网络安全审计与渗透测试频次等措施，融入智能化管理手段，提升急时运行效率。根据需要规划必要的设备及物资储备空间，满足“急时”需求。通过物联网、大数据、人工智能等技术，实现设施的实时监控、资源调度和应急响应。同时，设施的设计应预留一定的扩展性，便于未来根据需求进行功能扩展和升级。

**3.0.5** “平急两用”公共服务设施在日常维护过程中应当定期巡查相应系统、设备的运行状态，检查应急状态下设备设施接口，按照相关规定定期进行检查评估，及时整修维护，确保应急状态下快速转换的安全和顺畅。

应当定期开展必要的日常培训和应急演练。空气消毒设备、空调系统、净化系统等设施应根据使用频率、运行状况等开展定期常规巡检。

**3.0.6** “平急两用”临时设施宜采用模块化设计理念，并应注重标准化、通用性和轻型化。

“急时”新增的物理隔断、设施、室外临时建筑等使用的材料：其耐火性能、污染指标应符合相关消防、环保的标准和规定；其主要构件和材料应选用难燃或不燃材料，并应符合现行国家标准《建筑防火通用规范》GB 55037、《建筑内部装修设计防火规范》GB 50222、《建筑设计防火规范》GB 50016-2014（2018 版）的规定。

**3.0.7** “平急两用”公共服务设施的建筑、结构、给排水、通风与空调、电气与智能化等专业“平时”和“急时”的两套方案，均应满足国家、行业、北京市现行相关规范、标准的要求。

## 4 通用设计要求

### 4.1 应急场景分级分类

**4.1.1** 结合《应急避难场所 分级和分类》DB11/T 2141、《防灾避难场所设计规范》GB51143-2015、《北京市应急避难场所规划(2022 年—2035 年)》等相关标准、专项规划要求,对本指南中“平急两用”公共服务设施安置时长、有效安置面积、可容纳人数、灾害响应等级等要求如下:

**表 4.1.1-1 “平急两用”公共服务设施基于避难安置时长分类表**

| 类目             | 说明                     |
|----------------|------------------------|
| 紧急“平急两用”公共服务设施 | 安置时长 $\leq 24\text{h}$ |
| 短期“平急两用”公共服务设施 | 安置时长 2d~14d 之间         |

**表 4.1.1-2 “平急两用”公共服务设施有效避难面积控制指标表**

| 类目             | 说明                       |                            |             |
|----------------|--------------------------|----------------------------|-------------|
|                | 有效避难面积 (m <sup>2</sup> ) | 人均有效避难面积 (m <sup>2</sup> ) | 可容纳安置人数     |
| 紧急“平急两用”公共服务设施 | $\geq 1800$              | $\geq 3.0$                 | $\geq 600$  |
| 短期“平急两用”公共服务设施 | $\geq 7200$              | $\geq 4.5$                 | $\geq 1600$ |

- 注: 1. 紧急“平急两用”公共服务设施可容纳安置人数测算方法: 可容纳安置人数= (场所有效避难面积-设施设备及物资占地面积)/人均有效安置面积。
2. 短期“平急两用”公共服务设施可容纳安置人数测算方法: 可容纳安置人数=应急宿住区有效避难面积/人均有效安置面积。

**表 4.1.1-3 “平急两用”公共服务设施灾害响应等级表**

| 响应等级 | 应对灾种                                                                | 急时功能 | 说明                   |
|------|---------------------------------------------------------------------|------|----------------------|
| 防疫类型 | 重大传染病疫情                                                             | 隔离观察 | 按“三区两通道”要求进行设计、建设、验收 |
| 基础类型 | 地震、水灾等灾害为主, 统筹兼顾气象灾害、突发地质灾害、危险化学品事故、火灾事故、矿山事故、恐怖袭击事件等灾害, 兼容其他相关灾害风险 | 临时安置 | 直接启用                 |

注: 北京市作为超大型城市和首都, 面临着多种自然灾害和事故灾害的威胁。根据北京市应急管理相关规划(如《北京城市总体规划(2016年—2035年)》、《北京市应急避难场所规划(2022 年—2035 年)》等), 北京防灾、减灾主要以应对地震、水灾等灾害为主, 统筹兼顾气象灾害、突发地质灾害、危险化学品事故、火灾事故、矿山事故、重大传染病疫情、恐怖袭击事件等灾害, 兼容支撑其他相关灾害风险。

**4.1.2** 结合中小学校、展览馆、体育馆建筑特点及《北京市应急避难场所规划(2022 年—2035 年)》中主要灾种情况, 对公共服务设施“平急转换”启用时序建议如下:

**表 4.1.2 “平急两用”公共服务设施应急启用时序表**



| 灾种                                                      | 优先启用         | 备用   | 主要功能                          |
|---------------------------------------------------------|--------------|------|-------------------------------|
| 重大传染病疫情                                                 | 体育馆、展览馆      | 中小学校 | 应急指挥、物资保障、应急医疗功能为主, 隔离观察为备用功能 |
| 地震、水灾、气象灾害、突发地质灾害、危险化学品事故、火灾事故、矿山事故、恐怖袭击事件等灾害, 兼容其他相关灾害 | 体育馆、展览馆、中小学校 |      | 人员安置、应急指挥、应急医疗、物资保障           |

注：对于中小学等学校类建筑，考虑卫生安全及社会影响等因素，不建议作为重大传染病疫情事件发生时隔离观察、人员安置使用，但可作为应急指挥、物资转运等功能使用。

## 4.2 规划选址

**4.2.1** “平急两用”公共服务设施选址应符合上位国土空间总体规划、详细规划、分区规划及其他相关专项规划要求。重点与《北京市韧性城市空间专项规划(2022年—2035年)》、《北京市应急避难场所规划（2022年—2035年）》等相衔接。

**4.2.2** “平急两用”公共服务设施的选址应结合重大危险源调查、各项灾害风险、用地安全、应急保障及服务能力评估和资源环境承载力评价、国土空间开发适宜性评价、年度城市体检等结果，确保设施安全性和应急保障能力。

**4.2.3** 选址应优先满足以下条件：

- （1）交通便利，临近城市主干道或次干道，确保应急车辆快速通行；
- （2）市政基础设施完善，具备供水、供电、通信等冗余保障能力；
- （3）疏散条件良好，周边道路具备临时拓宽或应急集散能力。

**4.2.4** 选址应避开以下区域：

- （1）地质条件不良区域（如地震断裂带、地质灾害易发区（山体滑坡、地面塌陷等））；
- （2）洪涝灾害高风险区（如行洪通道、蓄滞洪区、历史内涝点等）；
- （3）环境敏感区（如饮用水源保护区、污染场地、高噪音或强电磁干扰区等）；
- （4）危险化学品生产、储存设施的安全防护范围内（参照相关国家标准）；
- （5）航空限高区、军事管制区等特殊管控区域。

**4.2.5** 用于防疫的“平急两用”公共服务设施除满足上述要求外，还应避开：

- （1）首都功能核心区及城市副中心核心区；
- （2）大型医院、交通枢纽、冷链物流基地等潜在风险集中区域周边；
- （3）高密度居住区核心地带或人员高度聚集场所。

## 4.3 资源调查与风险评估

**4.3.1** 通过对公共服务设施基本信息、场址安全、设防情况、周边环境、配套设施情况等开展资源调查，经资源评估后，将符合要求的公共服务设施纳入应急避难资源管理，经评估符合条件的公共服务设施可按程序改造为“平急两用”应急避难场所。

**4.3.2** 应采用文档资料收集与现场勘查相结合的方法开展资源调查。文档资料调查应重点收集公共服务设施的基本信息、物资储备信息、功能分布图灾害事故风险及设防要求等材料。现场勘查宜选择采用现场调查结合资料分析等方式，获取公共服务设施场址安全、建筑布局、

结构设防、周边环境、设施配置、开敞空间的场地数量、所在楼层、室内使用面积等情况信息。

**4.3.3** 资源调查主要围绕基本信息、场址安全、设防情况、周边环境情况、配套设施情况等展开。整体评估结论应给出公共服务设施是否可纳入室内应急避难资源管理、适用应对灾种、可容纳避难人数等判定。

**4.3.4** 在启动平急转换前应对公共服务设施的使用风险和启用转换条件开展评估。

## **4.4 平急转换要求**

**4.4.1** “平急两用”公共服务设施的平急转换应快速、便捷。基础类型宜在 8 小时内完成平急转换，防疫类型宜在 48 小时内完成平急转换。

**4.4.2** “平急两用”公共服务设施项目的设计应包含“平时”使用设计图纸及“急时”转换设计方案图纸，并编制平急转换设计专篇（包括“急时”的功能分区、流线组织，以及平急转换技术措施等）。防疫级“平急两用”公共服务设施转换专篇应增加机电急时运行方案、隔离措施等。

平急转换后：不应占用原有消防车道、消防救援场地；不应改变建筑原有防火分区的划分及消防疏散路由。

**4.4.3** “平急两用”公共服务设施应制定明确的平急转换双向技术方案。制定“平转急”方案，明确“平时”功能退场要求和“急时”功能完工条件，对转换过程中必要的工程措施提前做好施工组织设计，按照设施规模大小和使用状况，确定平急转换时限要求。同时，制定“急转平”方案，明确“急时”功能退场要求和“平时”功能复原条件。确保紧急情况下的快速转换及事后功能快速恢复。

**4.4.4** “平急两用”公共服务设施应同时设置“平急转换”标识系统。当转换成“急时”状态时，便于立即启用、引导、管理，“平急转换”标识系统应明确标识人员进入、安置、转运、离开的流线和工作人员工作、巡视的流线。

平急转换的室内外导视牌标识应满足“平时”及“急时”使用场地导视牌标识要求。“急时”标识的色彩、尺寸及装置位置，应具备高度醒目、高识别性。

**4.4.5** “平急两用”公共服务设施“急时”功能空间应与“平时”功能同步建设、同步验收。室外场地临时设施（移动厕所、室外应急用水、用电等）可预留场地、接口，紧急情况下采用装配式部品安装施工。

**4.4.6** 平急转换完成后的设施应满足属地政府相关部门与急时使用团队的相关要求，且应通过相关部门验收通过后方可投入使用，并同步移交相关归档资料。

**4.4.7** “平急两用”公共服务设施应建立“平急两用”公共服务设施统筹管理机制，相关部门和“平急两用”公共服务设施运营主体应制定平急转换管理办法和制度，明确双向转换管理要求。

**4.4.8** “平急两用”公共服务设施应适时检查相应系统、设备的状态，并每三年至少开展一次平急转换演习，保证各系统、设备及应急处置体系处于正常状态。

## **4.5 设计通用要求**

**4.5.1** 总平面设计通用要求：

### **4.5.1.1 基础类型**

1 “平急两用”公共服务设施应合理规划内部车行道路、人行路、绿化、集散场地，在“平时”应避免观众、工作人员、货运以及垃圾运输流线交叉，在“应急”时应满足安置人员和工作人员、物资配送流线独立且不交叉；

2 “平急两用” 公共服务设施应具备良好的交通条件，并有开阔的室外场地，能合理、高效地响应应急功能转换需要，满足人员、物资、车辆的集散要求，并设置应急物资的装卸存放场地；

3 “平急两用” 公共服务设施场地内应有应急停车区域及回车场地或应急停车设施设置在周边 100m，设置可用于消防车、应急救援车等车辆的停车位，停车场出入口宽度和高度满足应急救援车辆通行。应急停车区域应预留物资和急救车停车场，根据避难场所的规模、功能要求确定。其中，主、次通道设计除考虑避难人员通行外，尚需考虑消防、救护、运输等通行要求，应满足《防灾避难场所设计规范》GB51143 第 5.4.4 条、《应急避难场所 场址及配套设施》DB11/T2142 第 6.2.13 条的相关规定。急救车停车场应设置车辆消毒设施，满足急救车快速抵达和消毒后安全撤离的要求。

4 “平急两用” 公共服务设施新建、改建工程出入口与城市道路衔接，应满足《城市道路工程设计规范》CJJ37、《城市道路空间规划设计标准》DB11/T 1116 等相关规范。

5 “平急两用” 公共服务设施竖向设计时应考虑尽量减少土方工程量、合理解决场地排水问题，整体符合工程技术经济性及方便施工的要求。

#### 4.5.1.2 防疫类型

总平面应分为清洁区和污染区。清洁区应设置医护人员、医药及物资临时用房和运行保障设施。污染区应设置患者登记临时用房和等候场地，临时厕所和污物处理设施；医患、洁污、人车的流线组织应避免相互交叉；清洁区分设医护和管理人员出入口、医药和物资入口。污染区分设患者出入口和污物运输口。清洁区和污染区之间应设置有效的隔离设施并有明显标识；

#### 4.5.2 建筑设计通用要求：

##### 4.5.2.1 基础类型

1 “平急两用” 公共服务设施应设置避难人员、物资运输和污物清运的通道和出入口；

2 “平急两用” 公共服务设施使用区域的地面应采用便于清扫、冲洗和消毒的材料及构造，满足防水、防潮、防虫和防鼠的要求；

3 “平急两用” 公共服务设施出入口的宽度应满足该区域最大人数的疏散要求，所有疏散门应向外开启；

4 展览馆、体育馆、学校设计应考虑到未来可能的扩展需求和技术升级，确保在灾害应对方面的设施和技术能够随着技术的发展不断更新和完善。

##### 4.5.2.2 防疫类型

展览馆、体育馆建筑平面应实现“三区两通道”的格局，保证医患分离、洁污分离，并满足国家相关规范标准。

#### 4.5.3 结构设计通用要求：

1 “平急两用” 公共服务设施抗震设计应符合下列规定：

1) 应采用设置多道抗震防线的结构体系；

2) 建筑形体应规则，抗侧力构件在平面内的布置应规则对称，结构刚度和承载力沿竖向应均匀变化；

3) 应当按不低于重点设防类的要求采取抗震设防措施；

4) 单层建筑的抗震要求和抗震措施应按层数为两层的建筑选取；

5) 建筑的楼梯间应采取加强的抗震措施；

6) 对于建筑非结构构件和建筑附属机电设备，其自身及其与主体结构的连接应进行抗震设计，并应采取与主体结构加强连接或柔性连接的措施，达到与应急建筑相同的抗震设防目标。

7) “平急两用” 建筑宜对抗震设防性能进行提高。

2 “平急两用” 公共服务设施结构布置、荷载、构造做法应同时满足应急转化改造前后建筑功能使用的要求。

3 “平急两用” 公共服务设施需满足其他专业对应急转化的设置要求，如土建风道、设备基础等功能。

4 “平急两用” 公共服务设施结构设计应考虑应急转化机电设备的安装要求，预留设备安装荷载。

5 展览馆、体育馆应急情况时可能受到污染的埋地检查井、预消毒池、化粪池、污水池等混凝土抗渗等级不宜低于 P8，最大裂缝的宽度限值不宜大于 0.2mm。

#### 4.5.4 给水排水设计通用要求：

##### 4.5.4.1 基础类型

1 “平急两用” 公共服务设施的给水排水设计应符合《建筑给水排水设计标准》GB50015、《建筑给水排水与节水通用规范》GB 55020、《建筑设计防火规范》GB50016 等现行给水排水、消防给水技术规范、标准；

2 有“平急两用”需求的建筑或区域，给水排水系统设计应满足《防灾避难场所设计规范》GB51143、《应急避难场所 场址及配套设施》DB11/T2142 等的规定；

3 生活给水系统的人员用水量应按照《防灾避难场所设计规范》GB51143 中相关规定设计，且储水量不应小于 3d 的饮用水和基本生存生活用水的水量之和；

4 生活给水水质应满足现行《生活饮用水卫生标准》GB5749，宜设置或预留给水消毒设施；

5 生活污水集水池的总有效容积，应大于应急使用时污水 3d 内排水量的 1.25 倍，且宜预留移动排水设施。

##### 4.5.4.2 防疫类型

1 展览馆、体育馆给水系统和排水系统应根据清洁区和污染区的划分，分别设置

2 展览馆、体育馆生活热水系统水加热设备的出水温度低于 60℃时，应设置消灭致病菌的消毒设施或采取系统内热水定期升温的灭菌措施。

3 展览馆、体育馆污染区空调冷凝水应集中收集，且应进行消毒合格后，方可排放。

4 展览馆、体育馆排水系统通气管出口应设置在远离人员活动区并且通风良好的室外部位，污染区的排水系统通气管出口应设置高效过滤器或其他可靠的消毒设施。

#### 4.5.5 供暖、通风与空调设计通用要求：

##### 4.5.5.1 基础类型

1 “平急两用” 公共服务设施的供暖、通风与空调设计应符合《民用建筑供暖通风与空气调节设计规范》GB50736、《建筑节能与可再生能源利用通用规范》GB55015、《建筑设计防火规范》GB50016 等现行暖通空调、防烟排烟技术规范、标准；

2 应设置应急时使用的自然通风或机械通风设施，且宜与平时使用的相关设施合用；

3 人员新风量应按照《防灾避难场所设计规范》GB51143 中相关规定设计，且新风口应有不受灾难影响的防护措施。

##### 4.5.5.2 防疫类型

展览馆、体育馆通风系统和空调系统应根据清洁区和污染区的划分，分别设置；供暖系统宜根据清洁区和污染区的划分，分别设置。

#### 4.5.6 电气与智能化设计通用要求

##### 4.5.6.1 基础类型

1 “平急两用” 公共服务设施的电气、智能化设计应符合《民用建筑电气设计标准》GB51348、《建筑电气与智能化通用规范》GB55024、《安全防范工程通用规范》GB55029、《消防设施通用规范》GB55036、《建筑防火通用规范》GB55037 及专项规范等现行技术规

范、标准；

**2** 有“平急两用”需求的建筑或区域，设计应满足《防灾避难场所设计规范》GB51143、《应急避难场所 场址及配套设施》DB11/T2142 等的相关规定，并为应急场所预留充足临时用电条件；

**3** 有“平急两用”需求的建筑或区域，电力电缆、通信电缆和光缆，应选择燃烧性能不低于 B1 级、产烟毒性不低于 t1 级、燃烧滴落物/微粒等级不低于 d1 级的线缆；

**4** 有“平急两用”需求的建筑或区域，应设置火灾自动报警系统。

#### **4.5.6.2 防疫类型**

展览馆、体育馆应划分清洁区和污染区，配电箱、控制箱宜设置在污染区外，清洁区、污染区应分别设置配电回路。

## 5 中小学校

### 5.1 基础类型要求

#### 5.1.1 适宜性分析

**5.1.1.1** 为保障未成年人身体健康，防止疾病大范围传播，中小学校不作为防疫场所使用。

**5.1.1.2** “平急两用”中小学校在规划设计时应充分整合现有日常设施资源,进行应急避难专项设计。需根据《室内型应急避难场所平急转换技术要求中小学校》DB11/T2461 的要求设计应急转换方案，确保灾时能够快速启用并部署到位。

**5.1.1.3** 中小学校正常教学期间发生突发事件需要应急避难时，应首先满足本校师生应急避难需求；假期或学生不在校期间，发生突发事件需要应急避难时，可作为应急避难场所对外开放。改造设计应充分结合与利用现状条件，尽量减少应急状态下对原建筑空间的改动和破坏。

**5.1.1.4** 中小学校主要功能分区包括室外操场和活动场地、教学楼、宿舍楼、报告厅、风雨操场等场馆空间、车库和辅助用房等。室外操场和活动场地、风雨操场等大场馆能够快速搭建临时避难休息区；教学用房可以改造为应急指挥中心、物资存储点或临时医疗区；教学楼、宿舍楼可作为应急住宿区；停车区和库房可用于集中存放救灾物资和大型救灾设备。

**5.1.1.5** 根据现行标准《中小学校设计规范》GB50099 和《北京市中小学校办学条件标准》中对学校规模的要求，考虑到校园内各项设施的综合承载能力,校园灾时所容纳人数以校园平时使用人数为人数控制上限,对应规模可安置人员如下：

表 5.1.1.5 “平急两用”中小学校可容纳安置人员指标表

| 学校类型 | 建筑面积（m <sup>2</sup> ） | 可容纳安置人员（人） |
|------|-----------------------|------------|
| 小学   | 10452                 | ≤528       |
|      | 13208                 | ≤792       |
|      | 16464                 | ≤1056      |
|      | 19099                 | ≤1320      |
|      | 22027                 | ≤1584      |
| 初中   | 15826                 | ≤792       |
|      | 18959                 | ≤1056      |
|      | 22435                 | ≤1320      |
|      | 25660                 | ≤1584      |
|      | 31750                 | ≤2112      |
| 高中   | 18036                 | ≤891       |
|      | 21645                 | ≤1188      |
|      | 25099                 | ≤1485      |
|      | 29280                 | ≤1782      |
|      | 37037                 | ≤2376      |
| 完中   | 17619                 | ≤842       |
|      | 21447                 | ≤1122      |
|      | 28381                 | ≤1683      |
|      | 35578                 | ≤2244      |
|      | 16079                 | ≤792       |

|      |       |             |
|------|-------|-------------|
| 九年制校 | 20278 | $\leq 1188$ |
|      | 24382 | $\leq 1584$ |
|      | 28356 | $\leq 1980$ |
|      | 33265 | $\leq 2376$ |

注:按照各类型学校中不同班额学校所对应的在校师生人数,作为可容纳安置人员数的上限

## 5.1.2 总平面设计

**5.1.2.1** “平急两用”中小学校的选址充分考虑安全性因素,至少有两个方向不同的出入口通向周边市政道路,且校园操场与周边市政道路有便捷的联系。

**5.1.2.2** “平急两用”中小学校应合理规划内部车行道路、人行路、绿化、集散场地,在“平时”应避免学生教师、后勤、行车、货运以及垃圾运输流线交叉,在“应急”时应避免避难人员、工作人员、物资配送流线交叉。

**5.1.2.3** “平急两用”中小学校设施应符合现行国家标准的相关规定。双车道宽度不应小于7m;单车道宽度不宜小于4m,应满足运输、救援车辆的快速通行要求。

**5.1.2.4** 移动充电车预留位置临近校园主要出入口或应急通道,与避难人员主要活动区、医疗救治区、物资储备区等保持安全距离,确保充电作业不干扰人员疏散和救援。

## 5.1.3 建筑设计

**5.1.3.1** “平急两用”中小学校应根据防灾的时限长短(长期、短期、紧急)配置不同的功能空间,紧急及短期防灾校园可优先选择操场、体育馆、大型多功能厅等大空间作为应急避难的场所。

**5.1.3.2** “平急两用”中小学校的设计应考虑地震、洪水等各种灾害的应对措施。结构设计和材料选择应确保建筑物的稳定性,同时设置应急通道和避难区域,确保人员在紧急情况下的安全疏散。

**5.1.3.3** “平急两用”中小学校需提前做好抗灾期间的分区运行管理预案,并根据预案提前在建筑内预留好水暖电接口,且校园内预留好到达接口的通路。

**5.1.3.4** “平急两用”中小学校建筑宜设置多部电梯,方便不同人员物品使用。

**5.1.3.5** “平急两用”中小学校建筑装饰材料尽量采用不易吸附污物,能够彻底清洁的材质。标识设计,具备紧急时段快速转换的条件。

## 5.1.4 结构设计

**5.1.4.1** “平急两用”中小学校的场地选址优先选择地势较高、地质条件稳定、远离危险源(如滑坡、洪水易发区)的地段。建筑内部二次结构墙安全性提高。

**5.1.4.2** “平急两用”中小学校结构设计应采取多道抗震防线,并按本地区抗震设防烈度提高一度的要求采取抗震措施。

**5.1.4.3** “平急两用”中小学校结构改造时应对原有建筑结构体系进行全面评估,若原结构体系不满足新的使用要求,应采用合理的加固方法或改变结构形式,确保建筑安全。

## 5.1.5 给排水设计

**5.1.5.1** “平急两用”在“平时”和“灾时”的设计中,均应符合《建筑给水排水设计标准》GB50015、《建筑给水排水与节水通用规范》GB 55020、中小学校设计规范》GB50099等现行给水排水、消防给水技术规范、标准。

**5.1.5.2** 平急结合区的给排水、消防系统应兼顾平时和灾时,符合平时高效运行的前提下,满足灾情期间快速有效转换。体现平急工况的差别,减少转换的工作量,改造难度大的项目如管网应一次性设计满足灾情标准,在灾情期间可快速加装成型的项目可在设计时做好预留条件,灾情时快速有效实施。

**5.1.5.3** “平急两用”中小学校宜采用两路市政供水,接口宜位于不同市政路段。

**5.1.5.4** 平急两用场所应保障灾时基本生活用水,急时可增设储水罐、应急水箱、供水车等

为灾时人员提供冷、热水服务，保障饮用水和基本生存生活用水的具体要求如下：

- 1 饮用水和基本生存生活用水应急储水装置宜分别单独设置；
- 2 灾时用水量标准为:饮用水满足 3L/(人·日)，生活用水满足 10L/(人·日)；
- 3 生活饮用水可采用管道直饮水、电开水器、桶装水等供应方式。开水供水量按 1~2L/(人·日)计，其用水量可计入饮水量中；
- 4 饮用水和基本生活用水的水质应不低于现行国家标准《生活饮用水卫生标准》GB 5749 的规定。

**5.1.5.5** 平急两用场所应生活热水系统宜采用闭式热水系统。应结合平时需求设计，急时可增设局部热水系统，急时增设局部热水系统宜采用电热，预留安装、水电接口条件。

**5.1.5.6** 平急两用场所给水系统主管入口应预留水质检测口，宜设置在线水质检测系统。

**5.1.5.7** 平急两用场所排污设施应保障灾时排污需求，应设灾时基本生活污水集水池，基本生活污水集水池的有效容积应大于避难场所开放 3d 产生的全部污水量的 1.25 倍。必要时可增设移动污水收集设施污水吸运设备，保障应急排污需求。

**5.2.5.8** 室外灾时临时用水点，应预留给水排水接口。

### **5.1.6 通风与空调设计**

**5.1.6.1** “平急两用”中小学校需提供“平时”和“急时”可靠的供暖方式，满足人员供暖需求，前期设计需预留后期能独立运行的条件。“急时”供暖系统的热源可采用电加热。保障冬季室内温度不应低于 18 摄氏度。

**5.1.6.2** 中小学校“平急两用”空调通风设计需满足人员新风需求，尽量利用既有满足条件的房间。

### **5.1.7 电气与智能化设计**

**5.1.7.1** “平急两用”中小学校电气与智能化系统除满足平时需求外，应满足灾害时应急避难的需求（如设备机房、设备容量、改造条件以及相关改造接口等），在灾害发生时可及时转换为“急时”电气系统。

**5.1.7.2** “急时”电气系统包括：应急供电设施、应急照明设施、应急消防设施、应急通信设施、指挥管理设施。“急时”电气系统设计应按《应急避难场所 场址配套设施》DB11T2142 执行。

**5.1.7.3** “平急两用”电气系统具体要求如下：

- 1 供电系统包括：多路电网供电系统或太阳能供电系统、柴油发电机（或预留发电机接口条件）、充电桩、充电设备等，供电系统应能满足“急”时所有负荷用电需求。当预留发电机接口条件时，室外应预留移动柴油发电车或箱式柴油发电机组的位置；

- 2 照明系统包括常用照明和备用照明系统，备用照明系统应具备接入灾时避难区域的备用照明及值班照明的条件。

**5.1.6.4** “平急两用”智能化系统具体要求如下：

- 1 通信系统应具备灾时有线、无线网络接入的接口条件，根据灾时需求预留有线、无线通信系统容量及进出线路由；

- 2 视频监控系统及信息发布系统、公共广播系统根据灾时需求预留有线、无线通信系统容量及出线路由。

**5.1.7.5** “急时”所需的等电位联结端子箱、强弱电线路的桥架、保护管及接线箱（盒）等宜先期预留、预埋到位，且不应影响“平时”状态的使用功能和建筑效果



## 6 展览馆

### 6.1 基础类型要求

#### 6.1.1 适宜性分析

**6.1.1.1** 平急转换应遵循“安全至上”的原则，确保在“平急两用”状态下的消防、建筑结构和设施设备运行的安全性，确保“平急两用”状态下各类使用人群的安全。（在既有建筑进行平急转换改造前，应对改造后应急保障设施的规模及建筑物的整体安全性检测评估。）

**6.1.1.2** 对具备“平急两用”功能的新建展览馆，应充分考虑“平急两用”的结合。应从结构安全、设备容量、消防疏散、设备空间等方面预留应急转换的条件，制订应急转换方案，其平急转换设计宜与展览馆功能设计同时完成或预留应急期间的相关接口。

**6.1.1.3** 改造设计应充分结合与利用现状条件，尽量减少应急状态下对原建筑空间的改动。

**6.1.1.4** 新建类和改造类“平急两用”展览馆的规划、设计除满足本《指南》要求外，还应符合现行国家、北京市相关法律法规、设计规范及技术标准的规定。

**6.1.1.5** 利用既有改造类展览馆，通过对给排水、电力供应等进行合理改造，实现储备、应急避险、应急宿住等功能。新建类的展览馆在满足展览展示等功能的同时，一并考虑应急指挥、应急宿住、物资储备等应急救援功能。

**6.1.1.6** 展览馆主要功能分区包括展厅区和辅助用房的主体区域以及室外观众集散广场、停车区和室外展场区域。展厅区能够快速搭建临时避难休息区；辅助用房可以改造为应急指挥中心、物资存储点或临时医疗区；室外观众集散广场可作为人员疏散和临时安置场所；停车区和室外展场可用于集中存放救灾物资和大型救灾设备。

**6.1.1.7** 根据现行行业标准《展览建筑设计规范》JGJ218 中对展览建筑规模的要求，展览建筑规模有特大型展览、大型展览、中型展览、小型展览；展厅的等级按其展览面积划分为甲等、乙等和丙等；展厅平时使用人数依据《建筑设计防火规范》GB50016 中 5.5.21 第 6 条，展厅人员密度不宜小于 0.75 人/m<sup>2</sup>，应急时，展览馆对应规模可安置宿住人员如下：

表 6.1.1.7 “平急两用”展览馆可容纳安置人员指标表

| 建筑规模 | 总展览面积 S (m <sup>2</sup> ) | 展厅等级 (展厅面积 m <sup>2</sup> )     | 可容纳安置人员 (人) |
|------|---------------------------|---------------------------------|-------------|
| 特大型  | S>100000                  | 甲等 (展厅面积>10000 m <sup>2</sup> ) | ≥3000       |
| 大型   | 30000<S≤100000            | 甲等 (展厅面积>10000 m <sup>2</sup> ) | ≥3000       |
| 中型   | 10000<S≤30000             | 乙等 (展厅面积 5000<S≤10000)          | 1600~3000   |
| 小型   | S≤10000                   | 丙等 (展厅面积≤5000)                  | ≤1600       |

#### 6.1.2 总平面设计

**6.1.2.1** 总体布局应符合北京市相关城市管理规定的要求。设计重点是“平急两用”展览馆设施整体布局的有机衔接与快速便捷的转换设计。

**6.1.2.2** 在“平时”室外卸货场和展场应有宽敞的空间，在“应急”可利用室外场地搭建临时用房，用于安装医疗设备用房以及临时库房。室外场地的面积不宜少于展厅占地面积的 50%，展览建筑应按不小于 0.20 m<sup>2</sup>/人配置集散用地，应符合《展览建筑设计规范》JGJ218-2010 的有关规定。

**6.1.2.3** 展览馆总体布局应符合现行国家标准的相关规定。用于应急的道路双车道宽度不应小于 7m；单车道宽度不宜小于 4m，应满足运输、救援车辆的快速通行要求，应符合《民用建筑设计统一标准》GB50352 的有关规定。

**6.1.2.4** 应充分利用信息化手段和自助服务技术，将展览馆的智慧化设计结合“应急”需求

设置，以减少人员聚集的风险。

### **6.1.3 建筑设计**

**6.1.3.1** 展览馆应多功能性设计，既能用于日常展览，也能在灾害发生时转换为应急安置场所。设计时应考虑展览区域与应急安置区域的灵活分隔，确保在紧急情况下能够满足转换用途。

**6.1.3.2** “平急两用”展览馆的安全性设计，展览馆的设计应考虑各种灾害的应对措施，包括地震、洪水等自然灾害的防护措施。结构设计和材料选择应确保建筑物的稳定性，同时设置应急通道和避难区域，确保人员在紧急情况下的安全疏散，应对措施应满足《防灾避难场所设计规范》GB51143 第 3.2 条得相关规定。

**6.1.3.3** 卫生间的设施数量应满足安置场所相关规定。

**6.1.3.4** 建筑内应设置婴幼儿、老人、行动困难的残疾人和伤病员等特殊群体的安置住宿空间，安置避难场所应满足无障碍设计要求和《防灾避难场所设计规范》GB51143 的相关规定。

**6.1.3.5** 建筑内宜设置电梯，方便人员和物资运输。

### **6.1.4 结构设计**

**6.1.4.1** 展厅设计时需统筹地震、风灾、火灾、水灾等复合型灾害的叠加效应，优化结构冗余度与逃生通道布局。

**6.1.4.2** 针对自然灾害发生时的特殊工况，建议补充抗连续倒塌设计，通过拆除构件法验证关键构件失效后的结构稳定性，保证多道传力路径，提升局部破坏后的整体刚度。

**6.1.4.3** 位于山区、河道周边等可能受到洪灾影响的项目，需考虑洪水冲击、地下水位上升、水体浸泡等对结构构件的不利影响。

### **6.1.5 给水排水设计**

**6.1.5.1** 市政直供低区系预留与应急时储存加压系统的接口。

**6.1.5.2** 展馆预留应急使用时电热水器和电开水器安装条件，且应根据用水点位置，采用局部设置。

### **6.1.6 供暖、通风与空调设计**

**6.1.6.1** 展览馆的空调，除需满足平时使用要求外，应按照应急时新风和室内环境要求校核空调选型。

### **6.1.7 电气与智能化设计**

**6.1.7.1** 展览馆的供电电源条件，除需满足日常使用要求外，应预留自备电源接入条件，需提前规划应急发电设备设置位置，并就近预留应急电源接入柜。

**6.1.7.2** 展览馆宜设有光伏等分布式电源接入，系统宜预留储能装置安装、接入条件，并应就近规划储能装置安装位置。

**6.1.7.3** 展览馆在设有正常照明、应急照明的基础上，还应设置值班照明。

**6.1.7.4** 展览馆应设有有线通讯机网络系统，并应设有无线宽带网络、移动通信室内信号覆盖系统。

**6.1.7.5** 展览馆内应设置广播系统，并根据业务部门、使用需求划分功能分区，实现分区广播功能，并具备消防广播功能。

## **6.2 防疫类型要求**

### **6.2.1 适宜性分析**

**6.2.1.1** 利用既有改造类展览馆，通过对给排水、电力供应等进行合理改造，实现储备、应急避险、应急住宿等功能。新建类的展览馆在满足展览展示等功能的同时，一并考虑应急指挥、临时安置住宿、物资储备、医疗救助等应急救灾功能。

**6.2.1.2** 展览馆主要功能分区包括展厅区和辅助用房的主体区域以及室外观众集散广场、停车区和室外展场区域。展厅区能够快速搭建临时病床区；辅助用房可以改造为医疗救助用房；室外观众集散广场可作为非医护工作区；停车区和室外展场可用于集中存放医疗设备和医护工作区。

**6.2.1.3** 根据现行行业标准《展览建筑设计规范》JGJ218 中对展览建筑规模的要求，展览建筑规模有特大型展览、大型展览、中型展览、小型展览；展厅的等级按其展览面积划分为甲等、乙等和丙等；展厅平时使用人数依据《建筑设计防火规范》GB50016 中 5.5.21 第 6 条，展厅人员密度不宜小于 0.75 人/m<sup>2</sup>，应急时，展览馆对应规模可安置宿住人员如下：

**表 6.2.1.3 “平急两用”展览馆可容纳安置人员指标表**

| 建筑规模 | 总展览面积 S (m <sup>2</sup> ) | 展厅等级 (展厅面积 m <sup>2</sup> )     | 可容纳安置人员 (人) |
|------|---------------------------|---------------------------------|-------------|
| 特大型  | S>100000                  | 甲等 (展厅面积>10000 m <sup>2</sup> ) | ≥2000       |
| 大型   | 30000<S≤100000            | 甲等 (展厅面积>10000 m <sup>2</sup> ) | ≥2000       |
| 中型   | 10000<S≤30000             | 乙等 (展厅面积 5000<S≤10000)          | 1000~2000   |
| 小型   | S≤10000                   | 丙等 (展厅面积≤5000)                  | ≤1000       |

**6.2.2 总平面设计**

**6.2.2.1** “平急两用”展览馆总体布局应合理规划内部车行道路、人行路、绿化、集散场地，在“平时”应避免观众、工作人员、货运以及垃圾运输流线交叉，在“应急”时应满足避难人员和工作人员、物资配送流线独立且不交叉。

**6.2.2.2** 临近安置人员出入口应设置急救车专用停车位和回车场地。

**6.2.2.3** 移动充电车预留位置临近场馆主要出入口或应急通道，与避难人员主要活动区、医疗救治区、物资储备区等保持安全距离，确保充电作业不干扰人员疏散和救援。

**6.2.2.4** 室外场地应有宽敞的空间，可搭建临时用房，用于安装医疗设备以及临时库房。

**6.2.3 建筑设计**

**6.2.3.1** 新建建筑，在满足平时使用功能的前提下，应兼顾转换后的功能、空间、设施、设备的使用要求。

**6.2.3.2** 展览馆建筑，在满足“平时”展览、配套用房使用功能的前提下，应兼顾应急转换后的隔离住宿区、物资存储、应急指挥等功能，严格做好平时和应急的进行各类功能区设计，并应制定建设时序及应急启用的转换方案。

**6.2.3.3** 应结合现状条件，充分利用原有空间，预留应急情况下对避难住宿隔离、安全疏散、食品供应、垃圾收集和管理服务等设施的位置与规模进行设计，且应符合《防灾避难场所设计规范》GB51143 的有关规定。

**6.2.3.4** 展览馆可通过划分独立功能模块（如病患舱、洗消舱、物资存储舱、检验舱等），实现“平急”功能快速切换。

**6.2.3.5** “平急两用”展览馆空间布局需遵循“三区两通道”原则：清洁区（医护办公）、半污染区（卫生通过）、污染区（病房），并设置独立出入口以避免交叉感染。

**6.2.3.6** “平急两用”展览馆的大跨度无柱空间灵活性设计，展览馆主体结构宜采用大跨度设计，减少承重柱对空间分割的影响，便于快速布置床位或隔离单元。

**6.2.3.7** “平急两用”展览馆地面荷载设计需预留医疗设备安装需求，如 CT 机、移动手术台等重型设备等。

**6.2.3.8** “平急两用”展览馆的墙面、地面选用耐腐蚀、易清洁材料，便于高频次消杀。

**6.2.3.9** 建筑内部通道有高差时应用坡道连接，满足人员转运的无障碍通行，宽度确保移动病床及陪护人员同时通过。

**6.2.3.10** 展览馆宜使用首层作为主要的医疗隔离空间，平时的人员密集场所展览配套功能可满足应急期间的使用，如卫生间、库房等。

**6.2.3.11** 医护人员和患者的卫生间应分开设置。医护人员的卫生间应配置洗漱、厕位和淋浴的设施。患者的卫生间宜在场馆外独立设置，并按照 1:1 比例分设男女卫生间。

**6.2.3.12** “平急两用”展览馆用地内通过设施划分污染区和清洁区，进入污染区需进行防护。清洁区应设置医护人员、医药及物资临时用房和运行保障设施。污染区应设置患者登记临时用房和等候场地，临时厕所和污物处理设施。

**6.2.3.13** 清洁区分设医护和管理人员出入口、医药和物资入口。污染区分设患者出入口和污物运输口。清洁区和污染区之间应设置有效的隔离设施并有明显标识。

**6.2.3.14** “平急两用”展览馆所在地在保证正常功能使用外，应急时应严格做好“隔离与管理”分区运行预案。

## **6.2.4 结构设计**

**6.2.4.1** 展厅设计时需考虑疫情期间，人员密集使用、增加建筑隔墙、增加设备电气吊挂等特殊情况对结构布置及受力计算的影响。

## **6.2.5 给水排水设计**

**6.2.5.1** 污染区的给水干管宜单独接自室外给水管道，应在管道接入点预留断流水箱安装条件，当采用断流水箱供水有困难时，可预留减压型倒流防止器安装接口条件。清洁区给水管道不宜布置在污染区内。

**6.2.5.2** 为室外急救车辆停放处及医疗废物暂存间的预留给排水条件，并且接入污染区给排水管道。

**6.2.5.3** 污染区污水处理应采用二级生化处理，当排入有城市污水处理厂的城市污水管道时，其污水处理可采用强化消毒处理工艺。需提前规划处理设备或消毒设备设置位置，并预留安装条件。

## **6.2.6 供暖、通风与空调设计**

**6.2.6.1** 污染区集中空调通风系统可采用直流式机组配合间接热回收方式，或采用新风机组配合风机盘管方式。如采用全空气一次回风空调系统，机组新风量应满足补风要求，按照回风口设置高中效的空气过滤设备计算空调机组静压，如果与空调机组平时工况不同空调机电机设置变频满足不同工况需求。

**6.2.6.2** 污染区卫生间应设置机械排风设施，排风量不小于 12 次/h。

**6.2.6.3** 污染区及其卫生间的排风应预留消毒装置安装条件。

**6.2.6.4** 污染区排风宜高空排放，且与任何进风口水平距离不得小于 20 米，或高于新风取风口不小于 6 米。污水通气管与送风系统取风口应保持安全距离，如果不能满足需预留转换延长风道条件。

## **6.2.7 电气与智能化设计**

**6.2.7.1** 展览馆的供电系统应能满足一级负荷用电的要求，或预留自备电源接入条件。系统设计时应预留充足的临时用电条件，需提前规划应急发电设备设置位置，并就近预留应急电源接入柜。

**6.2.7.2** 主要用电负荷的分级应满足《会展建筑电气设计规范》等规范要求，且重要公共区域的送排风机负荷等级不应低于二级。

**6.2.7.3** 展览馆在设有正常照明、应急照明的基础上，还应设置值班照明。

**6.2.7.4** 建筑内应做好等电位联结与共用接地系统，如预留有自备电源接入条件时，也应预留等电位接地接引条件，确保供电系统的安全。规划盥洗间、淋浴间及有淋浴功能的卫生间、机房等场所，应预留局部等电位联结条件。

**6.2.7.5** 展览馆应设有有线通讯机网络系统，并应设有无线宽带网络、移动通信室内信号覆

盖系统。

**6.2.7.6** 展览馆内应设置广播系统，并根据业务部门、使用需求划分功能分区，实现分区广播功能，并具备消防广播功能。

**6.2.7.7** 除在各出入口、门厅（大堂）、主要通道、电梯轿厢等场所设置监控摄像机外，还应预留临时增设监控摄像机接入条件。

## 7 体育馆

### 7.1 基础类型要求

#### 7.1.1 适宜性分析

**7.1.1.1** 平急两用的体育馆应进行应急避难专项设计，在规划时应充分整合现有日常设施资源。场馆内的设施设备需预先设计应急转换方案，确保灾时能够快速启用并部署到位。

**7.1.1.2** 体育馆主要功能分区包括场地区、看台和辅助用房的主体区域以及室外观众集散广场、停车区和器材库的配套区域。场地区和观众休息区能够快速搭建临时避难休息区；看台下方的空间和辅助用房可以改造为应急指挥中心、物资存储点或临时医疗区；室外观众集散广场可作为人员疏散和临时安置场所；停车区和器材库可用于集中存放救灾物资和大型救灾设备。

**7.1.1.3** 根据现行行业标准《体育建筑设计规范》JGJ31，体育馆可分为特大型、大型、中型和小型体育馆，不同类型体育馆的场地规格有不同的要求。应急时，体育馆场地按照 3 m<sup>2</sup>/人的人均有效安置面积计算安置人员人数。场地面积对应可安置人员人数如下：

表 7.1.1.3-1 “平急两用”体育馆场地可容纳安置人员指标表

| 建筑分类 | 观众席容量人数（人） | 最小场地面积（m <sup>2</sup> ） | 可容纳安置人员（人） |
|------|------------|-------------------------|------------|
| 特大型  | >10000     | ≥2800                   | ≥933       |
| 大型   | 6000-10000 | ≥2800                   | ≥933       |
| 中型   | 3000-6000  | ≥1056                   | ≥352       |
| 小型   | <3000      | ≥760                    | ≥253       |

除场地区外，观众休息区也可搭建临时避难休息区。根据现行行业标准《体育建筑设计规范》JGJ31，观众休息区人均面积 0.1 m<sup>2</sup>~0.2 m<sup>2</sup>/人。应急时，体育馆观众休息区按照 3 m<sup>2</sup>/人的人均有效安置面积计算安置人员人数。场地面积对应可安置人员人数如下：

表 7.1.1.3-2 “平急两用”体育馆观众休息区可容纳安置人员指标表

| 建筑分类 | 观众席容量人数（人） | 观众休息区面积（m <sup>2</sup> ） | 可容纳安置人员（人） |
|------|------------|--------------------------|------------|
| 特大型  | >10000     | >1000                    | >333       |
| 大型   | 6000-10000 | 600-1000                 | 200-333    |
| 中型   | 3000-6000  | 300-600                  | 100-200    |
| 小型   | <3000      | <300                     | <100       |

#### 7.1.2 总平面设计

**7.1.2.1** 根据避难人数利用室外观众集散广场设置应急集散区，用于避难人员快速集散、等候和登记信息等，其面积不应小于 0.25 m<sup>2</sup>/人。

**7.1.2.2** 移动充电车预留位置临近场馆主要出入口或应急通道，与避难人员主要活动区、医疗救治区、物资储备区等保持安全距离，确保充电作业不干扰人员疏散和救援。

**7.1.2.3** 体育馆在应急时优先采用模块化集装箱式淋浴单元和更衣间，通过室外场地临时部署实现快速响应。

**7.1.2.4** 根据现行国家标准《应急避难场所设施设备及物资配置》YJ/T26-2024，每 100 人至少设置 1 个水龙头。平急两用的体育馆可按每 100 人设 1 个淋浴头作为基础参考密度，并配套污水收集系统。

**7.1.2.5** 临时更衣间应划分为男女独立区域，使用面积不低于 1.5 m<sup>2</sup>/人，并设置无障碍更衣间以满足特殊人群需求。

### **7.1.3 建筑设计**

**7.1.3.1** 体育馆的室内场地标高不低于 20 年一遇的防洪水位所确定的淹没水位加安全超高 0.3m。

**7.1.3.2** 体育馆的场地区和观众休息区应急时可转换为应急宿住。宿住区内还应为婴幼儿、老人、行动困难的残疾人和伤病员等特定群体设置专门的宿住区，并满足无障碍设计要求。

**7.1.3.3** 体育馆的场地区出入口的宽度应满足该区域最大人数的疏散要求，所有疏散门应向外开启。

**7.1.3.4** 避难人员使用的卫生间可利用体育馆内的观众卫生间。当场馆内数量不满足要求时，可考虑在体育馆室外广场或二层观众平台下方空间搭建临时卫生间。卫生间厕位数量不宜少于避难人数的 1%。卫生间区分男女设置时，女厕位的数量不宜低于男厕位数量的 1.5 倍。混合设置时，专用女厕位不宜低于总厕位数量的 20%。

**7.1.3.5** 工作人员更衣间、卫生间和淋浴间可利用体育馆内配备的运动员休息室设施。

### **7.1.4 结构设计**

**7.1.4.1** 体育馆建筑的基本风压应按不低于 100 年一遇的风压采用。

**7.1.4.2** 新建体育馆应按现行国家及地方标准要求，根据应急转化前后功能的改变进行整体建筑或局部范围包络设计。

**7.1.4.3** 新建体育馆应针对自然灾害发生时的特殊工况，补充抗连续倒塌设计，保证多道传力路径，提升局部破坏后的整体刚度。

### **7.1.5 给水排水设计**

**7.1.5.1** 生活热水系统在应急使用时，热源宜采用电热或预留安装条件，且应根据用水点位置，采用局部设置。

### **7.1.6 供暖、通风与空调设计**

**7.1.6.1** 严寒和寒冷地区应设置供暖系统，其他地区，根据室外气候条件，可设置供暖系统。供暖系统的热源可采用电热。

**7.1.6.2** 人员停留空间应保持正压，并防止由于灾难原因而产生的室外空气进入。

### **7.1.7 电气与智能化设计**

**7.1.7.1** 体育馆供电系统应满足《防灾避难场所设计规范》GB51143 中避难场所负荷等级的要求，并为应急场所预留充足临时用电条件。

**7.1.7.2** 体育馆的各种电气设备应具备就地手动控制功能。

**7.1.7.3** 体育馆的电气设备应选用便于安装、更换和防潮性能好的定型产品。

**7.1.7.4** 体育馆的场地区域正常照明和应急照明应满足应急场所的照度、显色性和防眩光等要求。

**7.1.7.5** 体育馆应配置应急通信设备并与应急指挥中心之间设置相互联络的直线或专线电话。

**7.1.7.6** 体育馆内应设置广播系统，应急场所使用的房间、场地等区域应根据功能分区分别设置广播分路和扬声器，并具备消防广播功能。

## **7.2 防疫类型要求**

### **7.2.1 适宜性分析**

**7.2.1.1** 平急两用的体育馆应进行应急隔离专项设计，在规划时应充分整合现有日常设施资源。场馆内的设施设备需预先设计应急转换方案，确保疫情时能够快速启用并部署到位。

**7.2.1.2** 体育馆主要功能分区包括场地区、看台和辅助用房的主体区域以及室外观众集散广场、停车区和器材库的配套区域。场地区能够快速搭建临时设转换为隔离区；看台下方的空间和辅助用房可以改造为临时医疗救助区、医护工作区、后勤区；室外观众集散广场可作为

人员疏散和临时安置场所；停车区和器材库可用于集中存放医疗设备和临时库房。

**7.2.1.3** 根据现行行业标准《体育建筑设计规范》JGJ31，体育馆可分为特大型、大型、中型和小型体育馆，不同类型体育馆的场地规格有不同的要求。应急时，体育馆场地按照 4.5 m<sup>2</sup>/人的人均有效安置面积计算安置人员人数。场地面积对应可安置人员人数如下：

表 7.2.1.3 “平急两用”体育馆场地可容纳安置人员指标表

| 建筑分类 | 观众席容量人数（人） | 最小场地面积（m <sup>2</sup> ） | 可容纳安置人员（人） |
|------|------------|-------------------------|------------|
| 特大型  | >10000     | ≥2800                   | ≥622       |
| 大型   | 6000-10000 | ≥2800                   | ≥622       |
| 中型   | 3000-6000  | ≥1056                   | ≥234       |
| 小型   | <3000      | ≥760                    | ≥168       |

## 7.2.2 总平面设计

**7.2.2.1** 室外场地应有宽敞的空间，可搭建临时用房，用于安装医疗设备以及临时库房。

**7.2.2.2** 隔离人员使用的卫生间和淋浴间应采用模块化移动设施，通过室外场地临时部署实现快速响应。厕位数量不少于隔离人数的 1%，并按照 1:1 比例分设男女卫生间。

## 7.2.3 建筑设计

**7.2.3.1** 建筑内部通道有高差时应用坡道连接，满足人员转运的无障碍通行，宽度确保移动病床及陪护人员同时通过。

**7.2.3.2** 体育馆宜使用首层作为主要的隔离空间。当使用二层及以上空间时，应设置专用电梯和独立流线，保证隔离人员、医护人员、物资和污物的运送。

**7.2.3.3** 医护人员卫生间应配置洗漱、厕位和淋浴，与隔离人员卫生间分开设置，可利用体育馆内配备的运动员休息室设施。

## 7.2.4 结构设计

**7.2.4.1** 体育馆的基本风压应按不低于 100 年一遇的风压采用。

**7.2.4.2** 新建体育馆应按现行国家及地方标准要求，根据应急转化前后功能的改变进行整体建筑或局部范围包络设计。

## 7.2.5 给水排水设计

**7.2.5.1** 给水系统和排水系统应根据清洁区和污染区的划分，分别设置。

**7.2.5.2** 清洁区的给水系统、排水系统应根据相关规范设计。

**7.2.5.3** 污染区的给水干管宜单独接自室外给水管道，应在管道接入点设置倒流防止器，清洁区给水管道不宜布置在污染区内。

**7.2.5.4** 生活热水系统水加热设备的出水温度低于 60℃时，应设置消灭致病菌的消毒设施或采取系统内热水定期升温的灭菌措施。

**7.2.5.5** 污染区空调冷凝水应集中收集，且应进行消毒合格后，方可排放。

**7.2.5.6** 污染区的排水管道应独立设置，且应以全密闭方式敷设，不得穿过清洁区。

**7.2.5.7** 排水系统通气管出口应设置在远离人员活动区并且通风良好的室外部位，污染区的排水系统通气管出口应设置高效过滤器或其他可靠的消毒设施。

**7.2.5.8** 室外临时用水点，应预留给水排水接口。在接入给水系统时，应采用断流水箱供水方式，且应设置消毒设备。排水采用全密闭方式敷设，经消毒合格后，可排放到室外管线，或经收集后统一处理。

## 7.2.6 供暖、通风与空调设计

**7.2.6.1** 通风系统和空调系统应根据清洁区和污染区的划分，分别设置；供暖系统宜根据清洁区和污染区的划分，分别设置。

**7.2.6.2** 清洁区的暖通空调系统应根据相关规范设计。



**7.2.6.3** 污染区应设置或预留自然通风或机械通风设施。

**7.2.6.4** 从清洁区进入到污染区，应设置缓冲区，并采取正压缓冲隔离方式，即气流流向从清洁区至隔离区。从隔离区返回清洁区，采取负压缓冲隔离方式，即气流流向从清洁区至污染区。

**7.2.6.5** 各缓冲隔间通风短管应配置手动关断阀，通风短管的设置位置应形成合理的气流通道，尽量保证不留通风死角。

**7.2.6.6** 污染区集中空调通风系统应设置消毒装置，宜采用直流式机组配合间接热回收方式，或采用新风机组配合风机盘管方式。采用一次回风方式，应设置全新风运行方式。

**7.2.6.7** 污染区内，空气循环设施，宜设置消毒装置。

**7.2.6.8** 确保新风取自室外，新风取风口及其周围环境必须清洁，保证新风不被污染。室外排风宜高空排放，且与任何进风口水平距离不得小于 20 米，或高于新风取风口不小于 6 米。污水通气管与送风系统取风口应保持安全距离。

## **7.2.7 电气与智能化设计**

**7.2.7.1** 体育馆供电系统应满足《防灾避难场所设计规范》GB51143 中避难场所负荷等级的要求，并为应急场所预留充足临时用电条件。

**7.2.7.2** 体育馆的电气设备应选用便于安装、更换的定型产品。

**7.2.7.3** 体育馆的应急场所通风设备控制箱，宜采用成套定型产品，并具备集中控制功能。

**7.2.7.4** 体育馆应采取总等电位连接措施，应急场所医疗用房应设置等电位端子箱。

**7.2.7.5** 体育馆内场地区域周边应预留增设照明及插座用电条件。

**7.2.7.6** 体育馆内综合布线系统应预留应急场所语音及数据的接入条件，设置无线 WIFI 并保证无线移动通信信号覆盖。

**7.2.7.7** 体育馆内应设置广播系统，应急场所使用的房间、场地等区域应根据功能分区分别设置广播分路和扬声器，并具备消防广播功能。

## 8 配套设施

### 8.1 交通组织

**8.1.1** “平急两用”公共基础设施的场所应至少具备 2 个不同方向的主要出入口，应急出入口应与城市道路顺畅衔接。

**8.1.2** “平急两用”公共服务设施的道路系统应满足快速通行和安全使用要求，特别是大型客车、大型物流车辆及其他特需车辆的通行要求。建议道路转弯半径为 9m-12m。

**8.1.3** “平急两用”公共服务设施的道路净高应满足大型客车、大型物流车辆的通行要求，且不应低于 4.5m。

**8.1.4** “平急两用”公共服务设施的专用支线道路不应少于双车道，设计标准可参照城市支路。

**8.1.5** “平急两用”公共服务设施的专用支线道路不得设置路内停车场，且应设置禁止路边停车的标识。

**8.1.6** “平急两用”公共服务设施周边的道路交通信号控制系统应具备应急优先功能，实现信号灯紧急控制。

### 8.2 能源条件

**8.2.1** “平急两用”公共服务设施的能源供应，应采用多元化供能方式，确保在“急时”能源供应的连续性、稳定性。

**8.2.2** “平急两用”公共基础设施的电力系统应在满足现行规范的基础上，增加一个备用电源接口，确保在“急时”可接入移动发电设备。

**8.2.3** “平急两用”公共基础设施的供暖系统在接入市政管网的同时，需具备电采暖等备用方式。

### 8.3 供水系统

**8.3.1** “平急两用”公共基础设施应保证双水源。平时使用市政供水，应急时可切换至备用水源（如地下水井或临时供水车等）。

**8.3.2** “平急两用”公共基础设施的供水系统应预留应急供水支管接口，便于快速连接临时供水设备。

### 8.4 排水处理

**8.4.1** “平急两用”公共服务设施场地内外应采用雨污分流排水体制，设计预留污水排放和处理、雨水蓄滞等空间，预留雨污水处理设施相关配套水、电等接入条件。

**8.4.2** “平急两用”公共服务设施应结合安置人员数量和特点，合理确定“急时”污水收集处理设施规模和工艺，确保安全可靠，经济合理。

**8.4.3** 防疫级“平急两用”公共服务设施的排水系统应具备污水分区收集处置的条件，预留应急处理设施场地。排水设施根据“急时”隔离或安置人员数量，污水特点，合理选择污水处理设施，实现在“急时”状态下产生的污水全收集、全处理、全过程控制。

## **8.5 垃圾收集**

**8.5.1** “平急两用”公共服务设施应预留“急时”垃圾收集、转运设施场地，确保“急时”相关设施设备可快速安装投入使用。

**8.5.2** 防疫级“平急两用”公共服务设施应结合安置人员数量和特点，预留“急时”医疗垃圾收集、转运设施的独立场地，并设置明确警示标识。医疗废物的收集、消毒、包装、贮存、运输、处置等设施应满足医疗废物全过程控制需要。

**8.5.3** 垃圾收集、转运设施场地，应远离人员活动区域，尽量减少对建筑物及周边环境的影响，设置围墙或绿化防护带与其它区域相对分隔，位置应位于隔离区下风向。

**8.5.4** 防疫级“平急两用”公共服务设施应配置“急时”垃圾运输专用通道。专用通道宽度不小于 3.5 米，并设置独立出入口。

## **8.6 通信设施**

**8.6.1** “平急两用”公共服务设施及周边地区的广电设施、通信基站、通信机楼、通信枢纽、通信线路、宽带网络、微波通道等通信设施，应与各级应急指挥系统保持互联互通，并整合公安、消防、地震、防汛、市政、气象、防疫等应急指挥专用通信平台，协调共享应急通信专线和数据通道等资源，保障“平急两用”公共服务设施应急通信服务全覆盖。

**8.6.2** 防疫级“平急两用”公共服务设施预留“急时”部署智能化的管理应用条件，用于人员定位、环境监测等。

## **8.7 物资储备**

**8.7.1** “平急两用”公共服务设施应预留“急时”物资储备空间。

**8.7.2** “平急两用”公共服务设施“急时”物资储备空间，应根据可容纳人数、保障标准和临时安置天数，确定规模。

## 指南用词说明

- 1 为便于在执行本指南条文时区别对待，对要求严格程度不同的用词说明如下：
  - 1) 表示很严格，非这样做不可的：正面词采用“必须”，反面词采用“严禁”；
  - 2) 表示严格，在正常情况下均应这样做的：正面词采用“应”，反面词采用“不应”或“不得”；
  - 3) 表示允许稍有选择，在条件许可时首先应这样做的：正面词采用“宜”，反面词采用“不宜”；
  - 4) 表示有选择，在一定条件下可以这样做的：采用“可”。
- 2 条文中指明应按其他有关标准执行的写法为：“应符合……的规定”或“应按……执行”。

## 引用标准名录

- 1 《建筑防火通用规范》 GB55037
- 2 《建筑内部装修设计防火规范》 GB50222
- 3 《防灾避难场所设计规范》 GB51143
- 4 《消防设施通用规范》 GB55036
- 5 《建筑给水排水设计标准》 GB50015
- 6 《建筑给水排水与节水通用规范》 GB55020
- 7 《民用建筑供暖通风与空气调节设计规范》 GB50736
- 8 《建筑节能与可再生能源利用通用规范》 GB55015
- 9 《建筑设计防火规范》 GB50016
- 10 《民用建筑设计统一标准》 GB50352
- 11 《传染病医院建筑设计规范》 GB50849
- 12 《工程结构通用规范》 GB55001
- 13 《混凝土结构通用规范》 GB55008
- 14 《钢结构通用规范》 GB55006
- 15 《生活饮用水卫生标准》 GB5749
- 16 《民用建筑电气设计标准》 GB51348
- 17 《建筑电气与智能化通用规范》 GB55024
- 18 《安全防范工程通用规范》 GB55029
- 19 《中小学校设计规范》 GB50099
- 20 《应急避难场所 设施设备及物资配置》 GB/T 24439
- 21 《展览建筑设计规范》 JGJ218
- 22 《体育建筑设计规范》 JGJ31
- 23 《城市道路工程设计规范》 CJJ37、
- 24 《城市道路空间规划设计标准》 DB11/T 1116
- 25 《应急避难场所 分级和分类》 DB11/T 2141
- 26 《应急避难场所 场址配套设施》 DB11/T 2142
- 27 《室内型应急避难场所平急转换技术要求中小学校》 DB11/T2461
